# Supplementary material for: Pyrrolylsulfonium salts: stable, accessible and versatile pseudohalides for Stille couplings
Source: Royal Society of Chemistry journal article supplement (doi:10.1039/d4qo01793e), 2024-01-01
Supplement: d4qo01793e1.pdf [file d4qo01793e1.pdf]

## Pyrrolesulfonium salts: Stable, accessible and versatile pseudohalides for Stille couplings.

Jodie L. Hann,<sup>a</sup> Catherine L. Lyall,<sup>b</sup> Gabriele Kociok-Köhn,<sup>c</sup> and Simon E. Lewis<sup>\*a,d</sup>

- Department of Chemistry, University of Bath, Bath, BA2 7AY, United Kingdom.  
[S.E.Lewis@bath.ac.uk](mailto:S.E.Lewis@bath.ac.uk)
- Chemical Characterization Facility, University of Bath, Bath, BA2 7AY, United Kingdom.
- Physical Structure Characterization Facility, University of Bath, Bath, BA2 7AY, United Kingdom.
- Institute of Sustainability and Climate Change, University of Bath, Bath, BA2 7AY, United Kingdom.

### ELECTRONIC SUPPORTING INFORMATION

|                                                                                             |           |
|---------------------------------------------------------------------------------------------|-----------|
| General Experimental Details                                                                | Page S2   |
| Preparation of pyrrolylsulfonium salts <b>2•OTf</b> , <b>4•OTf</b> and <b>10•OTf-13•OTf</b> | Page S4   |
| General procedure for Stille coupling of pyrrolylsulfonium salts                            | Page S8   |
| Preparation of 3-substituted pyrroles <b>5a-5j</b>                                          | Page S9   |
| Preparation of 2-substituted pyrroles <b>7a-7f</b>                                          | Page S14  |
| Preparation of multiply-substituted pyrroles <b>14-18</b>                                   | Page S17  |
| <i>N</i> -deprotection of <b>5b</b> to give <b>20</b>                                       | Page S20  |
| NMR and IR spectra                                                                          | Page S21  |
| References Page                                                                             | Page S113 |

## General Experimental Details, Synthetic chemistry and compound characterisation.

### Reagents

Reagents were purchased from Fluorochem, Merck and Tokyo Chemical Industries. Trifluoromethanesulfonic anhydride was purchased from Merck only and used within 30 days of opening.

### Solvents

Reactions were carried out under an atmosphere of nitrogen, by purging the vessel with a flow of nitrogen. Dichloromethane, toluene and methanol were dried and degassed by passing through anhydrous alumina columns using an Innovative Technology Inc. PS-400-7 solvent purification system. DMF and *t*-butanol were commercial anhydrous grade, over 4Å molecular sieves. Pet Ether refers to petroleum ether, bp 40-60 °C. Solvents were removed using Büchi rotary evaporators and with high vacuum on a Schlenk line.

### Melting Points

Capillary melting points were recorded on a Büchi 535 melting point apparatus and are uncorrected.

### NMR Spectroscopy

<sup>1</sup>H, <sup>13</sup>C and <sup>19</sup>F NMR spectra were obtained using a 500 MHz Agilent ProPulse 500 or a 400 MHz Bruker Avance NEO NMR spectrometer, for which proton decoupling was active for <sup>13</sup>C NMR. Spectra were acquired at 298 K and were referenced to residual solvent peaks. Chemical shifts are reported in parts per million (ppm) relative to residual chloroform ( $\delta = 7.26$  ppm, <sup>1</sup>H; 77.16 ppm, <sup>13</sup>C) or DMSO ( $\delta = 2.50$  ppm, <sup>1</sup>H; 39.52 ppm, <sup>13</sup>C). Coupling constants, *J*, reported in Hz, were calculated using MestreNova x64 to the nearest 0.1 Hz. <sup>1</sup>H and <sup>13</sup>C{<sup>1</sup>H} assignments for novel compounds are corroborated through 2D NMR experiments (COSY, NOESY, HSQC, HMBC).

### Infrared Spectroscopy

Infrared (IR) spectra were recorded on a Perkin-Elmer Spectrum 100 ATR-FTIR spectrometer with only selected absorbances quoted as  $\nu$  in cm<sup>-1</sup>.

### Mass Spectrometry

For mass spectrometry a microTOF electrospray time-of-flight (ESITOF) mass spectrometer (Bruker Daltonik GmbH, Bremen, Germany) was used. Data are reported in the form of *m/z*. The observed mass and isotope pattern matched the corresponding theoretical values as calculated from the expected molecular formula.

### Chromatography

Analytical thin-layer chromatography was performed on Merck silica gel 60 F254 aluminium-backed plates. Visualisation was accomplished with UV light (254 nm), and vanillin stain. Automated flash column chromatography (normal phase) was performed using a Teledyne ISCO CombiFlash NextGen 300+ system equipped with UV and ELSD detectors, using 4 - 40g silica columns. RediSep® Bronze columns (40 - 60  $\mu$ m particle size) were used for the purification of all compounds, except *N*-trisyl protected Stille coupling products **5a-5j**, for which RediSep® Gold columns (20 - 40  $\mu$ m particle size) were required to achieve the stated isolated yields.

## X-ray Crystallography

Intensity data for **2**•PF<sub>6</sub> were collected at 150(2) K on a Rigaku Xcalibur, EosS2 single crystal diffractometer using graphite monochromated Mo-K $\alpha$  radiation ( $\lambda = 0.71073 \text{ \AA}$ ) and for **5f** on a Rigaku SuperNova Dual EosS2 single crystal diffractometer using monochromated Cu-K $\alpha$  radiation ( $\lambda = 1.54184 \text{ \AA}$ ). Unit cell determination, data collection data reduction and absorption correction were performed using the CrysAlisPro software<sup>1</sup>. The structures were solved with SHELXT<sup>2</sup> and refined by a full-matrix least-squares procedure based on  $F^2$  (SHELXL-2018-19/3)<sup>2</sup>. All non-hydrogen atoms were refined anisotropically. Additional programmes used for analysing data and their graphical manipulation included SHELXle<sup>3</sup>, ORTEP3 for windows<sup>4</sup> and Mercury.<sup>5</sup>

## Preparation of pyrrolylsulfonium salts **2•OTf**, **4•OTf** and **10•OTf-13•OTf**

### General Procedure A for the Synthesis of Pyrrolyl Sulfonium salts

The pyrrole (1.0 equiv) was added to a stirred solution of sulfoxide (1.0 equiv) in dry CH<sub>2</sub>Cl<sub>2</sub> (c = 0.32 M) in a round bottom flask under a nitrogen atmosphere. Trifluoromethanesulfonic anhydride (2.0 equiv) was added dropwise at stated temperature, and then stirred until consumption of pyrrole via TLC. The reaction was diluted with CH<sub>2</sub>Cl<sub>2</sub>, and washed with 1 M Na<sub>2</sub>CO<sub>3</sub> (aq), and then with brine. The aqueous phases were combined and extracted with CH<sub>2</sub>Cl<sub>2</sub> (x 3). The organic phases were then combined. (An additional wash with KPF<sub>6</sub> (aq) may also be performed to effect anion exchange at this point if required). The combined organic phase was then dried over MgSO<sub>4</sub> and filtered, then the filtrate was concentrated in *vacuo*. Purification was performed by dissolution of the crude material in MeCN, which was then extracted with 3 portions of an equal volume of hexane. The MeCN layer was then concentrated to dryness and the material was triturated with hexane before drying under high vacuum.

### General Procedure B for the Synthesis/isomerisation of Pyrrolyl Sulfonium salts with added Brønsted acid.

The pyrrole (1.0 equiv) was added to a stirred solution of sulfoxide (1.0 equiv) in dry CH<sub>2</sub>Cl<sub>2</sub> (c = 0.32 M) in a round bottom flask under a nitrogen atmosphere, followed by trifluoromethanesulfonic acid (3.0 equiv). Trifluoromethanesulfonic anhydride (2.0 equiv) was added dropwise at stated temperature, and then stirred until full isomerisation observed via <sup>1</sup>H-NMR spectroscopy of reaction aliquots. The reaction was diluted with CH<sub>2</sub>Cl<sub>2</sub>, and washed with 1 M Na<sub>2</sub>CO<sub>3</sub> (aq), and then with brine. The aqueous phases were combined and extracted with CH<sub>2</sub>Cl<sub>2</sub> (x 3). The organic phases were then combined. (An additional wash with KPF<sub>6</sub> (aq) may also be performed to effect anion exchange at this point if required). The combined organic phase was then dried over MgSO<sub>4</sub> and filtered, then the filtrate was concentrated in *vacuo*. Purification was performed by dissolution of the crude material in MeCN, which was then extracted with 3 portions of an equal volume of hexane. The MeCN layer was then concentrated to dryness and the material was triturated with hexane before drying under high vacuum.

### Diphenyl(1-(*p*-toluenesulfonyl)-1*H*-pyrrol-2-yl)sulfonium trifluoromethanesulfonate (**2•OTf**)

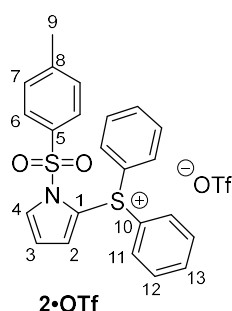

The starting material (*N*-tosylpyrrole) was prepared as reported previously.<sup>6</sup> **2•OTf** was prepared using *General Procedure A* (reaction time: 5 h), followed by recrystallisation from MeOH. Black crystals, 85%, m.p. 97-98 °C.

<sup>1</sup>H NMR (400 MHz, DMSO-*d*<sub>6</sub>) δ 8.24 (dd, *J* = 3.3, 1.7 Hz, 1H, H<sup>4</sup>), 7.91–7.85 (m, 2H, H<sup>13</sup>), 7.81–7.74 (m, 8H, H<sup>11,12</sup>), 7.71 (d, *J* = 8.4 Hz, 2H, H<sup>6</sup>), 7.41 (d, *J* = 8.4 Hz, 2H, H<sup>7</sup>), 6.81–6.71 (m, 1H, H<sup>3</sup>), 6.67 (dd, *J* = 4.0, 1.7 Hz, 1H, H<sup>2</sup>), 2.08 (s, 3H, H<sup>9</sup>) ppm. <sup>13</sup>C NMR (101 MHz, DMSO-*d*<sub>6</sub>) δ 147.4 (C<sup>8</sup>), 134.7 (C<sup>13</sup>), 133.0 (C<sup>5</sup>), 131.8 (C<sup>4</sup>), 131.5 (C<sup>11</sup>/C<sup>12</sup>), 130.8 (C<sup>11</sup>/C<sup>12</sup>), 130.7 (C<sup>7</sup>), 127.8 (C<sup>2</sup>), 127.5 (C<sup>6</sup>), 125.2 (C<sup>10</sup>), 115.4 (C<sup>3</sup>), 111.0 (C<sup>1</sup>), 21.2 (C<sup>9</sup>) ppm. HRMS (ESI+): calc. for C<sub>23</sub>H<sub>20</sub>NO<sub>2</sub>S<sub>2</sub> [M]<sup>+</sup> 406.0930, found 406.0928. IR (neat) 3056.2, 1476.2, 1593.9, 1192.0, 1379.3, 815.6 cm<sup>-1</sup>

**5-(1-((2,4,6-Triisopropylphenyl)sulfonyl)-1H-pyrrol-3-yl)-5H-thianthren-5-ium trifluoromethane sulfonate (4•OTf)**

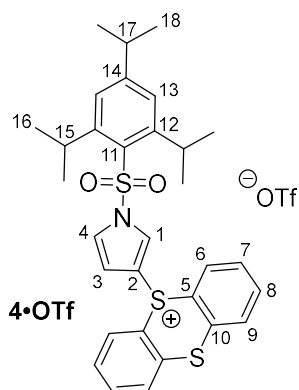

The starting material (*N*-trisylpyrrole) was prepared as reported previously.<sup>7</sup> **4•OTf** was prepared using *General Procedure B* (reaction time: 3 h), followed by purification by column chromatography (SiO<sub>2</sub>, CH<sub>2</sub>Cl<sub>2</sub>–MeOH). Grey powder, 84%, m.p. 80-85°C

<sup>1</sup>H NMR (400 MHz, CDCl<sub>3</sub>) δ 8.49 (d, *J* = 7.5 Hz, 2H, H<sup>6</sup>), 7.83–7.74 (m, 3H, H<sup>1</sup>), 7.72 (dd, *J* = 7.9, 1.2 Hz, 2H), 7.64 (dd, *J* = 7.5, 1.3 Hz, 2H), 7.19 (s, 2H, H<sup>13</sup>), 7.03 (dd, *J* = 3.4, 2.2 Hz, 1H, H<sup>4</sup>), 6.57 (dd, *J* = 3.1, 1.2 Hz, 1H, H<sup>3</sup>), 3.88 (hept, *J* = 6.8 Hz, 2H, H<sup>15</sup>), 2.90 (h, *J* = 7.1 Hz, 1H, H<sup>17</sup>), 1.25 (d, *J* = 6.9 Hz, 6H, H<sup>18</sup>), 1.09 (d, *J* = 6.6 Hz, 12H, H<sup>16</sup>) ppm. <sup>13</sup>C NMR (101 MHz, CDCl<sub>3</sub>) δ 156.5, 152.4, 135.5, 134.44, 134.41, 130.4, 129.8, 128.5, 125.8, 125.0, 123.0, 120.5, 112.0, 107.5, 34.5, 30.0, 24.6, 23.5 ppm. HRMS (ESI<sup>+</sup>) *m/z* calcd. for (C<sub>31</sub>H<sub>34</sub>NO<sub>2</sub>S<sub>3</sub>) [M]<sup>+</sup> 548.1746, found 548.1479. IR (neat) 2960.8, 1598.0, 1254.4, 884.2 cm<sup>-1</sup>

**(4-Acetyl-1-(*p*-toluenesulfonyl)-1H-pyrrol-2-yl)diphenylsulfonium trifluoromethanesulfonate (10•OTf)**

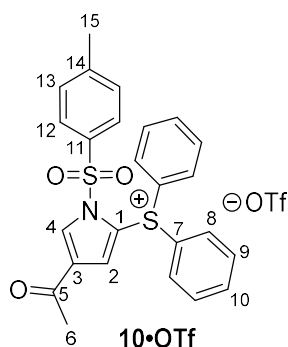

The starting material (3-acetyl-*N*-tosylpyrrole) was prepared as reported previously.<sup>6</sup> **10•OTf** was prepared using *General Procedure A*, followed by purification by column chromatography (SiO<sub>2</sub>, CH<sub>2</sub>Cl<sub>2</sub>–MeOH). Brown gum, 23%.

<sup>1</sup>H NMR (400 MHz, CDCl<sub>3</sub>) δ 8.19 (d, *J* = 1.9 Hz, 1H, H<sup>4</sup>), 8.13–8.07 (m, 2H, H<sup>12</sup>), 7.80–7.64 (m, 10H, H<sup>8-10</sup>), 7.56–7.52 (m, 2H, H<sup>13</sup>), 6.86 (d, *J* = 1.9 Hz, 1H, H<sup>2</sup>), 2.47 (s, 3H, H<sup>15</sup>), 2.46 (s, 3H, H<sup>6</sup>) ppm. <sup>13</sup>C NMR (101 MHz, CDCl<sub>3</sub>) δ 190.9 (C<sup>5</sup>), 148.7, 134.9, 133.0, 132.1 (C<sup>4</sup>), 131.9, 131.72, 131.65, 131.3, 130.9, 128.6 (C<sup>12</sup>), 124.5 (C<sup>2</sup>), 112.8, 27.4 (C<sup>6</sup>), 21.6 (C<sup>15</sup>) ppm. HRMS (ESI<sup>+</sup>): calc. C<sub>25</sub>H<sub>22</sub>NO<sub>3</sub>S<sub>2</sub><sup>+</sup> [M]<sup>+</sup> 448.1036, found 448.1039. IR (neat) 1681.7, 1260.7, 1146.3, 752.0 cm<sup>-1</sup>

**5-(4-Oxo-1-(*p*-toluenesulfonyl)-4,5,6,7-tetrahydro-1*H*-indol-2-yl)-5*H*-thianthren-5-ium trifluoromethanesulfonate (11•OTf)**

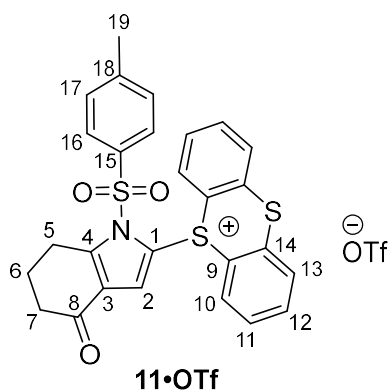

The starting material (1-(*p*-toluenesulfonyl)-1,5,6,7-tetrahydro-4*H*-indol-4-one) was prepared as reported previously.<sup>8</sup> **11•OTf** was prepared using *General Procedure A*, followed by purification by column chromatography (SiO<sub>2</sub>, CH<sub>2</sub>Cl<sub>2</sub>–MeOH). Beige powder, 60%

<sup>1</sup>H NMR (400 MHz, CDCl<sub>3</sub>) δ 8.63 (dd, *J* = 7.4, 2.0 Hz, 2H, H<sup>10</sup>), 7.88 (dd, *J* = 7.5, 1.5 Hz, 2H, H<sup>13</sup>), 7.79–7.70 (m, 6H, H<sup>11,12,16</sup>), 7.42 (d, *J* = 8.0 Hz, 2H, H<sup>17</sup>), 6.96 (s, 1H, H<sup>2</sup>), 2.76 (t, *J* = 6.1 Hz, 2H, H<sup>5</sup>), 2.50–2.42 (m, 2H, H<sup>7</sup>), 2.44 (3H, s, H<sup>19</sup>), 2.06 (app quint, *J* = 6.2 Hz, 2H, H<sup>6</sup>) ppm. <sup>13</sup>C NMR (101 MHz, CDCl<sub>3</sub>) δ 193.0 (C<sup>8</sup>), 147.9, 146.6, 142.2, 137.0, 135.7 (C<sup>10</sup>), 134.6, 132.5, 131.1 (C<sup>17</sup>), 130.4 (C<sup>13</sup>), 130.1, 128.3, 127.3 (C<sup>2</sup>), 121.5, 118.4, 36.5 (C<sup>7</sup>), 22.8 (C<sup>6</sup>), 22.5 (C<sup>5</sup>), 22.0 (C<sup>19</sup>) ppm. HRMS (ESI<sup>+</sup>): calc. C<sub>27</sub>H<sub>22</sub>NO<sub>3</sub>S<sub>3</sub><sup>+</sup> [M]<sup>+</sup> 504.0756, found 504.0749. IR (neat) 1673.1, 1430.6, 1387.4, 1028.7, 911.0 cm<sup>-1</sup>

**5-(5-Formyl-1-methyl-1*H*-pyrrol-3-yl)-5*H*-thianthren-5-ium trifluoromethanesulfonate (12•OTf)**

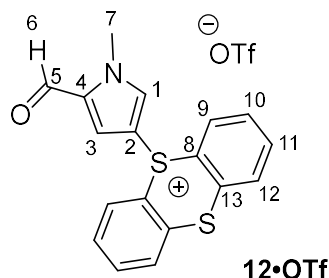

The starting material (1-methyl-2-pyrrolecarboxaldehyde) was purchased from Fluorochem. **12•OTf** was prepared using *General Procedure A*; product precipitated from the CH<sub>2</sub>Cl<sub>2</sub> reaction solvent upon standing. White powder, 47%, m.p. 108–111 °C.

<sup>1</sup>H NMR (500 MHz, CDCl<sub>3</sub>) δ 9.51 (s, 1H, H<sup>6</sup>), 8.43 (dd, *J* = 7.8, 1.4 Hz, 2H, H<sup>9</sup>), 8.26 (d, *J* = 1.9 Hz, 1H, H<sup>1</sup>), 7.82 (dd, *J* = 7.8, 1.3 Hz, 2H, H, H<sup>12</sup>), 7.73 (app td, *J* = 7.8, 1.6 Hz, 2H, H<sup>11</sup>), 7.67 (app td, *J* = 7.8, 1.4 Hz, 2H, H<sup>10</sup>), 7.12 (d, *J* = 1.9 Hz, 1H, H<sup>3</sup>), 3.96 (s, 3H, H<sup>7</sup>) ppm. <sup>13</sup>C NMR (126 MHz, CDCl<sub>3</sub>) δ 179.5 (C<sup>5</sup>), 137.4 (C<sup>1</sup>), 135.5 (C<sup>8</sup>), 134.4 (C<sup>11</sup>), 134.1 (C<sup>4</sup>), 133.9 (C<sup>9</sup>), 130.5 (C<sup>10</sup>), 130.1 (C<sup>12</sup>), 122.7 (C<sup>3</sup>), 121.5 (C<sup>13</sup>), 103.3 (C<sup>2</sup>), 37.9 (C<sup>7</sup>) ppm. HRMS (ESI<sup>+</sup>): calc. C<sub>18</sub>H<sub>15</sub>NOS<sub>2</sub><sup>+</sup> [M]<sup>+</sup> 324.0511, found 342.0827. IR (neat) 1660.3, 1443.4, 1003.1, 701.9 cm<sup>-1</sup>.

**5-(1,2,5-Trimethyl-1H-pyrrol-3-yl)-5H-thianthren-5-ium trifluoromethanesulfonate (13•OTf)**

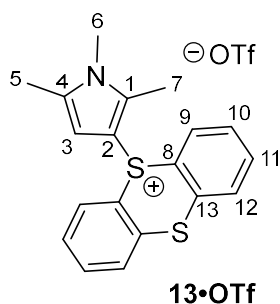

The starting material (1-methyl-2-pyrrolicarboxaldehyde) was purchased from Tokyo Chemical Industries. **13•OTf** was prepared using *General Procedure A*. Brown amorphous solid, 75%

$^1\text{H}$  NMR (400 MHz,  $\text{CDCl}_3$ )  $\delta$  7.84–7.76 (m, 2H,  $\text{H}^9$ ), 7.67–7.56 (m, 6H,  $\text{H}^{10-12}$ ), 5.97 (s, 1H,  $\text{H}^3$ ), 3.62 (s, 3H,  $\text{H}^6$ ), 2.55 (s, 3H,  $\text{H}^7$ ), 2.30 (s, 3H,  $\text{H}^5$ ) ppm.  $^{13}\text{C}$  NMR (101 MHz,  $\text{CDCl}_3$ )  $\delta$  143.1, 136.3, 132.8, 132.7, 130.33, 130.25, 128.8, 127.4, 105.7, 86.9, 32.0, 12.9, 11.5 ppm. HRMS (ESI+)  $m/z$  calcd. for ( $\text{C}_{19}\text{H}_{18}\text{NS}_2$ )  $[\text{M}]^+$  324.0875, found 324.0870. IR (neat) 3107.0, 1444.0, 812.2, 706.0  $\text{cm}^{-1}$ .

**General method for Optimised Stille Cross-Couplings:**

$\text{Pd}_2(\text{dba})_3$  (2 mol%),  $\text{AsPh}_3$  (16 mol%), pyrrolyl sulfonium salt (1.0 equiv) and tributylorganostannane (2.2 equiv) were added to a round bottom flask and 3 evacuation/ $\text{N}_2$  fill cycles were performed. DMF (dry,  $c = 0.12 \text{ M}$ ) was added, and the reaction was stirred at  $50 \text{ }^\circ\text{C}$  for 16-20 hours. The reaction was then concentrated under vacuum and filtered through a plug of celite with  $\text{CH}_2\text{Cl}_2$ . The filtrate was concentrated under vacuum, and the crude mixture purified via column chromatography ( $\text{SiO}_2$ , EtOAc–Pet Ether).

*NOTE: See the section on chromatography in the “General Experimental Details” for details of the stationary phases used for chromatographic purification of the coupling products.*



### 3-Phenyl-1-((2,4,6-triisopropylphenyl)sulfonyl)-1H-pyrrole (5a)

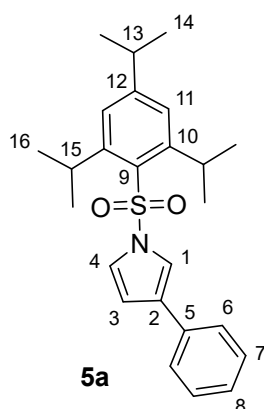

White powder, 76%, m.p. 108-111 °C

$^1\text{H}$  NMR (400 MHz,  $\text{CDCl}_3$ )  $\delta$  7.48 (d,  $J = 7.8$  Hz, 2H,  $\text{H}^6$ ), 7.38–7.32 (m, 3H,  $\text{H}^{4,7}$ ), 7.23 (t,  $J = 7.2$  Hz, 1H,  $\text{H}^8$ ), 7.21 (s, 2H,  $\text{H}^{11}$ ), 7.13 (dd,  $J = 2.8, 2.8$  Hz, 1H,  $\text{H}^1$ ), 6.58 (dd,  $J = 3.4, 1.7$  Hz, 1H,  $\text{H}^3$ ), 4.21 (hept,  $J = 6.7$  Hz, 2H,  $\text{H}^{15}$ ), 2.92 (hept,  $J = 6.8$  Hz, 1H,  $\text{H}^{13}$ ), 1.26 (d,  $J = 6.9$  Hz, 6H,  $\text{H}^{14}$ ), 1.21 (d,  $J = 6.8$  Hz, 12H,  $\text{H}^{16}$ ) ppm.  $^{13}\text{C}$  NMR (101 MHz,  $\text{CDCl}_3$ )  $\delta$  154.8 ( $\text{C}^{12}$ ), 151.7 ( $\text{C}^{10}$ ), 134.0 ( $\text{C}^5$ ), 131.0 ( $\text{C}^9$ ), 128.9 ( $\text{C}^7$ ), 128.4 ( $\text{C}^2$ ), 127.0 ( $\text{C}^8$ ), 125.8 ( $\text{C}^6$ ), 124.5 ( $\text{C}^{11}$ ), 120.9 ( $\text{C}^1$ ), 115.7 ( $\text{C}^4$ ), 110.8 ( $\text{C}^3$ ), 34.4 ( $\text{C}^{13}$ ), 29.8 ( $\text{C}^{15}$ ), 24.8 ( $\text{C}^{16}$ ), 23.6 ( $\text{C}^{14}$ ) ppm. HRMS (ESI+)  $m/z$  calcd. for ( $\text{C}_{25}\text{H}_{31}\text{NO}_2\text{S}$ ) [ $\text{M}+\text{H}$ ] $^+$  410.2154, found 410.2153. IR (neat) 3137.7, 1447.2, 1263.4, 768.0  $\text{cm}^{-1}$

### 3-(4-Fluorophenyl)-1-((2,4,6-triisopropylphenyl)sulfonyl)-1H-pyrrole (5b)

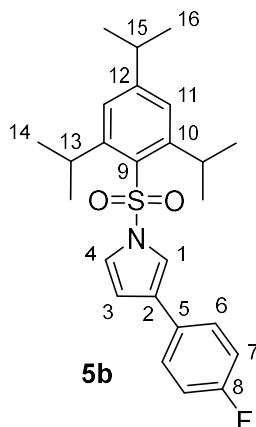

White powder, 58%, m.p. 105-110 °C

$^1\text{H}$  NMR (400 MHz,  $\text{CDCl}_3$ )  $\delta$  7.46-7.39 (m, 2H,  $\text{H}^6$ ), 7.29 (app t,  $J = 2.0$  Hz, 1H,  $\text{H}^1$ ), 7.21 (s, 2H,  $\text{H}^{11}$ ), 7.12 (dd,  $J = 3.3, 2.3$  Hz, 1H,  $\text{H}^4$ ), 7.03 (app t,  $J = 8.7$  Hz, 2H,  $\text{H}^7$ ), 6.52 (dd,  $J = 3.3, 1.7$  Hz, 1H,  $\text{H}^3$ ), 4.20 (hept,  $J = 6.8$  Hz, 2H,  $\text{H}^{13}$ ), 2.92 (hept,  $J = 6.9$  Hz, 1H,  $\text{H}^{15}$ ), 1.26 (d,  $J = 6.9$  Hz, 6H,  $\text{H}^{16}$ ), 1.20 (d,  $J = 6.8$  Hz, 12H,  $\text{H}^{14}$ ) ppm.  $^{13}\text{C}$  NMR (101 MHz,  $\text{CDCl}_3$ )  $\delta$  162.0 ( $^1J_{\text{CF}} = 245.7$  Hz,  $\text{C}^8$ ), 154.9 ( $\text{C}^{12}$ ), 151.7 ( $\text{C}^{10}$ ), 130.9 ( $\text{C}^9$ ), 130.2 ( $^4J_{\text{CF}} = 3.3$  Hz,  $\text{C}^5$ ), 127.5 ( $\text{C}^2$ ), 127.3 ( $^3J_{\text{CF}} = 7.9$  Hz,  $\text{C}^6$ ), 124.5 ( $\text{C}^{11}$ ), 121.0 ( $\text{C}^4$ ), 115.8 ( $^2J_{\text{CF}} = 21.6$  Hz,  $\text{C}^7$ ), 115.4 ( $\text{C}^1$ ), 110.7 ( $\text{C}^3$ ), 34.4 ( $\text{C}^{15}$ ), 29.8 ( $\text{C}^{13}$ ), 24.8 ( $\text{C}^{14}$ ), 23.6 ( $\text{C}^{16}$ ) ppm.  $^{19}\text{F}$  NMR (376 MHz,  $\text{CDCl}_3$ )  $\delta$  -115.7 (tt,  $J = 9.1, 4.6$  Hz). HRMS (ESI+)  $m/z$  calcd. for ( $\text{C}_{25}\text{H}_{31}\text{FNO}_2\text{S}$ ) [ $\text{M}+\text{Na}$ ] $^+$  450.1873; found 450.1885. IR (neat) 2964.0, 1344.9, 1060.8, 778.0  $\text{cm}^{-1}$ .

### 3-(4-(Benzyloxy)phenyl)-1-((2,4,6-triisopropylphenyl)sulfonyl)-1H-pyrrole (5c)

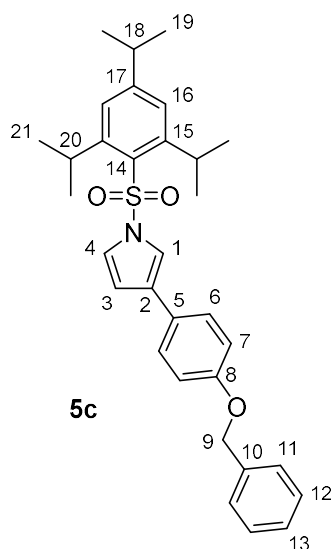

White powder, 75%, m.p. 140-142 °C

$^1\text{H}$  NMR (400 MHz,  $\text{CDCl}_3$ )  $\delta$  7.46–7.35 (m, 6H,  $\text{H}^{6,11,12}$ ), 7.34–7.30 (m, 1H,  $\text{H}^{13}$ ), 7.24 (app t,  $J = 2.0$  Hz, 1H,  $\text{H}^1$ ), 7.20 (s, 2H,  $\text{H}^{16}$ ), 7.10 (dd,  $J = 3.2, 2.2$  Hz, 1H,  $\text{H}^4$ ), 6.96 (d,  $J = 8.8$  Hz, 2H,  $\text{H}^7$ ), 6.51 (dd,  $J = 3.3, 1.7$  Hz, 1H,  $\text{H}^3$ ), 5.07 (s, 2H,  $\text{H}^9$ ), 4.20 (hept,  $J = 6.7$  Hz, 2H,  $\text{H}^{20}$ ), 2.91 (hept,  $J = 6.9$  Hz, 1H,  $\text{H}^{18}$ ), 1.26 (d,  $J = 6.9$  Hz, 6H,  $\text{H}^{19}$ ), 1.20 (d,  $J = 6.7$  Hz, 12H,  $\text{H}^{21}$ ) ppm.  $^{13}\text{C}$  NMR (101 MHz,  $\text{CDCl}_3$ )  $\delta$  158.0 ( $\text{C}^8$ ), 154.7 ( $\text{C}^{17}$ ), 151.7 ( $\text{C}^{15}$ ), 137.1 ( $\text{C}^{10}$ ), 131.1 ( $\text{C}^{14}$ ), 128.8 ( $\text{C}^{12}$ ), 128.12 ( $\text{C}^{13}$ ), 128.09 ( $\text{C}^2$ ), 127.6 ( $\text{C}^{11}$ ), 127.0 ( $\text{C}^5$ ), 126.9 ( $\text{C}^6$ ), 124.5 ( $\text{C}^{16}$ ), 120.8 ( $\text{C}^4$ ), 115.3 ( $\text{C}^7$ ), 114.9 ( $\text{C}^1$ ), 110.7 ( $\text{C}^3$ ), 70.2 ( $\text{C}^9$ ), 34.4 ( $\text{C}^{18}$ ), 29.7 ( $\text{C}^{20}$ ), 24.8 ( $\text{C}^{21}$ ), 23.6 ( $\text{C}^{19}$ ) ppm. HRMS (ESI+)  $m/z$  calcd. for ( $\text{C}_{32}\text{H}_{37}\text{NO}_3\text{S}$ ) [ $\text{M}+\text{H}$ ] $^+$  516.2567, found 516.2565. IR (neat) 2693.3, 1363.6, 1052.2, 795.0  $\text{cm}^{-1}$ .

### 3-(4-Chlorophenyl)-1-((2,4,6-triisopropylphenyl)sulfonyl)-1H-pyrrole (5d)

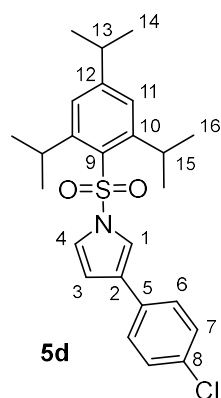

White powder, 54%, m.p. 85-89 °C

$^1\text{H}$  NMR (400 MHz,  $\text{CDCl}_3$ )  $\delta$  7.39 (d,  $J = 8.6$  Hz, 2H,  $\text{H}^6$ ), 7.34–7.28 (m, 3H,  $\text{H}^{4\text{or}1,7}$ ), 7.21 (s, 2H), 7.11 (dd,  $J = 3.3, 2.3$  Hz, 1H,  $\text{H}^{10\text{or}4}$ ), 6.53 (dd,  $J = 3.3, 1.7$  Hz, 1H,  $\text{H}^3$ ), 4.19 (hept,  $J = 6.8$  Hz, 2H,  $\text{H}^{15}$ ), 2.92 (hept,  $J = 6.9$  Hz, 1H,  $\text{H}^{13}$ ), 1.26 (d,  $J = 6.9$  Hz, 6H,  $\text{H}^{14}$ ), 1.20 (d,  $J = 6.8$  Hz, 12H,  $\text{H}^{16}$ ) ppm.  $^{13}\text{C}$  NMR (101 MHz,  $\text{CDCl}_3$ )  $\delta$  154.9 ( $\text{C}^{12}$ ), 151.8 ( $\text{C}^{10}$ ), 132.6 ( $\text{C}^5/\text{C}^8$ ), 132.5 ( $\text{C}^5/\text{C}^8$ ), 130.8 ( $\text{C}^9$ ), 129.0 ( $\text{C}^7$ ), 127.2 ( $\text{C}^2$ ), 127.0 ( $\text{C}^6$ ), 124.6 ( $\text{C}^{11}$ ), 121.1 ( $\text{C}^1$ ), 115.8 ( $\text{C}^4$ ), 110.6 ( $\text{C}^3$ ), 34.4 ( $\text{C}^{13}$ ), 29.8 ( $\text{C}^{15}$ ), 24.8 ( $\text{C}^{16}$ ), 23.6 ( $\text{C}^{14}$ ) ppm. HRMS (ESI+)  $m/z$  calcd. for ( $\text{C}_{25}\text{H}_{30}\text{ClNO}_2\text{S}$ ) [ $\text{M}+\text{Na}$ ] $^+$  466.1583, found 466.1590. IR (neat) 1585.0, 1042.1, 839.2  $\text{cm}^{-1}$ .

### 3-(3-(Trifluoromethyl)phenyl)-1-((2,4,6-triisopropylphenyl)sulfonyl)-1H-pyrrole (5e)

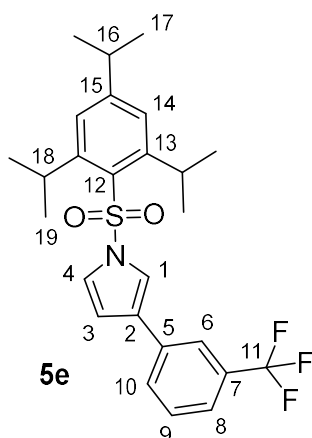

White crystals, 72%, m.p. 60-63 °C

$^1\text{H}$  NMR (400 MHz,  $\text{CDCl}_3$ )  $\delta$  7.70–7.68 (m, 1H,  $\text{H}^6$ ), 7.64 (dd,  $J = 7.2, 1.8$  Hz, 1H,  $\text{H}^{10}$ ), 7.50–7.43 (m, 2H,  $\text{H}^{8,9}$ ), 7.41 (dd,  $J = 2.0, 2.0$  Hz, 1H,  $\text{H}^1$ ), 7.22 (s, 2H,  $\text{H}^{14}$ ), 7.13 (dd,  $J = 3.3, 2.3$  Hz, 1H,  $\text{H}^4$ ), 6.59 (dd,  $J = 3.3, 1.7$  Hz, 1H,  $\text{H}^3$ ), 4.19 (hept,  $J = 6.8$  Hz, 2H,  $\text{H}^{18}$ ), 2.92 (hept,  $J = 6.9$  Hz, 1H,  $\text{H}^{16}$ ), 1.26 (d,  $J = 6.9$  Hz, 6H,  $\text{H}^{17}$ ), 1.21 (d,  $J = 6.8$  Hz, 12zH,  $\text{H}^{19}$ ) ppm.  $^{13}\text{C}$  NMR (101 MHz,  $\text{CDCl}_3$ )  $\delta$  155.1 ( $\text{C}^{15}$ ), 151.8 ( $\text{C}^{13}$ ), 134.9 ( $\text{C}^5$ ), 131.3 (q,  $^2J_{\text{CF}} = 32$  Hz,  $\text{C}^7$ ), 130.7 ( $\text{C}^{12}$ ), 129.4 ( $\text{C}^9$ ), 128.9 ( $\text{C}^{10}$ ), 127.0 ( $\text{C}^2$ ), 126.7 (q,  $^1J_{\text{CF}} = 240.4$  Hz,  $\text{C}^{11}$ ), 124.6 ( $\text{C}^{14}$ ), 123.5 (q,  $^3J_{\text{CF}} = 3.9$  Hz,  $\text{C}^8$ ), 122.4 (q,  $^3J_{\text{CF}} = 3.7$  Hz,  $\text{C}^6$ ), 121.3 ( $\text{C}^4$ ), 116.2 ( $\text{C}^1$ ), 110.5 ( $\text{C}^3$ ), 34.4 ( $\text{C}^{16}$ ), 29.8 ( $\text{C}^{18}$ ), 24.8 ( $\text{C}^{19}$ ), 23.6 ( $\text{C}^{17}$ ) ppm. HRMS (ESI+)  $m/z$  calcd. for  $(\text{C}_{26}\text{H}_{30}\text{F}_3\text{NO}_2\text{S})$   $[\text{M}+\text{H}]^+$  478.2028, found 478.2029.  $^{19}\text{F}$  NMR (376 MHz,  $\text{CDCl}_3$ )  $\delta$  -62.76 ppm. IR (neat) 2959.4, 1598.1, 1124.5, 790.9  $\text{cm}^{-1}$ .

### 3-(Thiophen-2-yl)-1-((2,4,6-triisopropylphenyl)sulfonyl)-1H-pyrrole (5f)

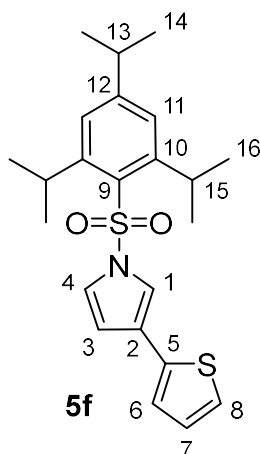

Colourless crystals, 80%, m.p. 113-118 °C

$^1\text{H}$  NMR (400 MHz,  $\text{CDCl}_3$ )  $\delta$  7.27 (app t,  $J = 2.0$  Hz, 1H,  $\text{H}^4$ ), 7.20 (s, 2H,  $\text{H}^{11}$ ), 7.15 (dd,  $J = 5.1, 1.2$  Hz, 1H,  $\text{H}^8$ ), 7.08 (dd,  $J = 3.3, 2.3$  Hz,  $\text{H}^1$ ), 7.07 (dd,  $J = 3.6, 1.2$  Hz,  $\text{H}^6$ ), 6.99 (dd,  $J = 5.1, 3.6$  Hz, 1H,  $\text{H}^7$ ), 6.47 (dd,  $J = 3.3, 1.7$  Hz, 1H,  $\text{H}^3$ ), 4.19 (hept,  $J = 6.8$  Hz, 2H,  $\text{H}^{15}$ ), 2.91 (hept,  $J = 6.8$  Hz, 1H,  $\text{H}^{13}$ ), 1.26 (d,  $J = 6.9$  Hz, 6H,  $\text{H}^{14}$ ), 1.20 (d,  $J = 6.7$  Hz, 12H,  $\text{H}^{16}$ ) ppm.  $^{13}\text{C}$  NMR (101 MHz,  $\text{CDCl}_3$ )  $\delta$  154.9 ( $\text{C}^{12}$ ), 151.8 ( $\text{C}^{10}$ ), 137.1 ( $\text{C}^5$ ), 130.9 ( $\text{C}^9$ ), 127.7 ( $\text{C}^7$ ), 124.6 ( $\text{C}^{11}$ ), 123.5 ( $\text{C}^8$ ), 123.0 ( $\text{C}^6$ ), 122.4 ( $\text{C}^2$ ), 120.9 ( $\text{C}^1$ ), 115.5 ( $\text{C}^4$ ), 111.2 ( $\text{C}^3$ ), 34.4 ( $\text{C}^{13}$ ), 29.8 ( $\text{C}^{15}$ ), 24.8 ( $\text{C}^{16}$ ), 23.6 ( $\text{C}^{14}$ ) ppm. HRMS (ESI+)  $m/z$  calcd. for  $(\text{C}_{23}\text{H}_{29}\text{NO}_2\text{S}_3)$   $[\text{M}+\text{H}]^+$  416.1713, found 416.1714. IR (neat) 2954.2, 2925.8, 1593.7, 1260.2, 1029.5, 750.0  $\text{cm}^{-1}$ .

### 3-(Furan-2-yl)-1-((2,4,6-triisopropylphenyl)sulfonyl)-1H-pyrrole (5g)

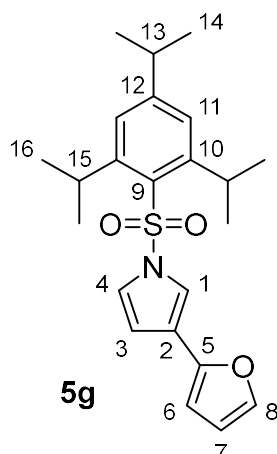

White powder, 77%, m.p. 122-125 °C

$^1\text{H}$  NMR (400 MHz,  $\text{CDCl}_3$ )  $\delta$  7.34 (dd,  $J = 1.8, 0.8$  Hz, 1H,  $\text{H}^8$ ), 7.31 (dd,  $J = 2.3, 1.6$  Hz, 1H,  $\text{H}^{1\text{or}4}$ ), 7.22 (s, 2H,  $\text{H}^{11}$ ), 7.12 (dd,  $J = 3.3, 2.3$  Hz, 1H,  $\text{H}^{1\text{or}4}$ ), 6.49 (dd,  $J = 3.3, 1.6$  Hz, 1H,  $\text{H}^3$ ), 6.39 (dd,  $J = 3.3, 1.8$  Hz, 1H,  $\text{H}^7$ ), 6.36 (dd,  $J = 3.4, 0.8$  Hz, 1H,  $\text{H}^6$ ), 4.20 (hept,  $J = 6.8$  Hz, 2H,  $\text{H}^{15}$ ), 2.92 (hept,  $J = 6.9$  Hz, 1H,  $\text{H}^{13}$ ), 1.27 (d,  $J = 7.0$  Hz, 6H,  $\text{C}^{14}$ ), 1.21 (d,  $J = 6.8$  Hz, 12H,  $\text{C}^{16}$ ) ppm.  $^{13}\text{C}$  NMR (101 MHz,  $\text{CDCl}_3$ )  $\delta$  154.9 ( $\text{C}^{12}$ ), 151.8 ( $\text{C}^{10}$ ), 149.4 ( $\text{C}^5$ ), 141.1 ( $\text{C}^8$ ), 130.8 ( $\text{C}^9$ ), 124.5 ( $\text{C}^{11}$ ), 120.8 ( $\text{C}^{1\text{or}4}$ ), 119.5 ( $\text{C}^2$ ), 115.0 ( $\text{C}^{1\text{or}4}$ ), 111.3 ( $\text{C}^7$ ), 109.6 ( $\text{C}^3$ ), 104.6 ( $\text{C}^6$ ), 34.4 ( $\text{C}^{15}$ ), 29.7 ( $\text{C}^{15}$ ), 24.8 ( $\text{C}^{16}$ ), 23.6 ( $\text{C}^{14}$ ) ppm. HRMS (ESI+)  $m/z$  calcd. for ( $\text{C}_{23}\text{H}_{29}\text{NO}_3\text{S}$ ) [ $\text{M}+\text{H}$ ] $^+$  400.1941, found 400.1942. IR (neat) 1593.4, 1475.4, 1222.0, 815.7, 745.9  $\text{cm}^{-1}$ .

### 3-(Prop-1-yn-1-yl)-1-((2,4,6-triisopropylphenyl)sulfonyl)-1H-pyrrole (5h)

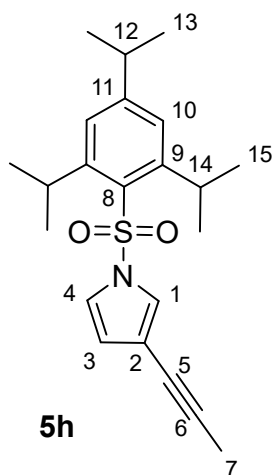

White powder, 71%, m.p. 130-133 °C

$^1\text{H}$  NMR (400 MHz,  $\text{CDCl}_3$ )  $\delta$  7.19 (s, 2H,  $\text{H}^{10}$ ), 7.09 (dd,  $J = 2.0, 2.0$  Hz, 1H,  $\text{H}^4$ ), 7.01 (dd,  $J = 3.2, 2.3$  Hz, 1H,  $\text{H}^1$ ), 6.26 (dd,  $J = 3.2, 1.6$  Hz, 1H,  $\text{H}^3$ ), 4.10 (hept,  $J = 6.7$  Hz, 2H,  $\text{H}^{14}$ ), 2.90 (hept,  $J = 7.0$  Hz, 1H,  $\text{H}^{12}$ ), 1.98 (s, 3H,  $\text{H}^7$ ), 1.25 (d,  $J = 6.9$  Hz, 6H,  $\text{H}^{13}$ ), 1.17 (d,  $J = 6.8$  Hz, 12H,  $\text{H}^{15}$ ) ppm.  $^{13}\text{C}$  NMR (101 MHz,  $\text{CDCl}_3$ )  $\delta$  155.0 ( $\text{C}^{11}$ ), 151.8 ( $\text{C}^9$ ), 130.6 ( $\text{C}^8$ ), 124.5 ( $\text{C}^{10}$ ), 122.4 ( $\text{C}^4$ ), 119.8 ( $\text{C}^1$ ), 114.8 ( $\text{C}^3$ ), 109.4 ( $\text{C}^2$ ), 86.1 ( $\text{C}^{5\text{or}6}$ ), 72.9 ( $\text{C}^{5\text{or}6}$ ), 34.4 ( $\text{C}^{12}$ ), 29.7 ( $\text{C}^{14}$ ), 24.8 ( $\text{C}^{15}$ ), 23.6 ( $\text{C}^{13}$ ), 4.4 ( $\text{C}^7$ ) ppm. HRMS (ESI+)  $m/z$  calcd. for ( $\text{C}_{22}\text{H}_{29}\text{NO}_2\text{S}$ ) [ $\text{M}+\text{H}$ ] $^+$  372.1997, found 372.1995. IR (neat) 2960.1, 1459.1, 950.7, 589.9  $\text{cm}^{-1}$ .

### 3-(Phenylethynyl)-1-((2,4,6-triisopropylphenyl)sulfonyl)-1H-pyrrole (5i)

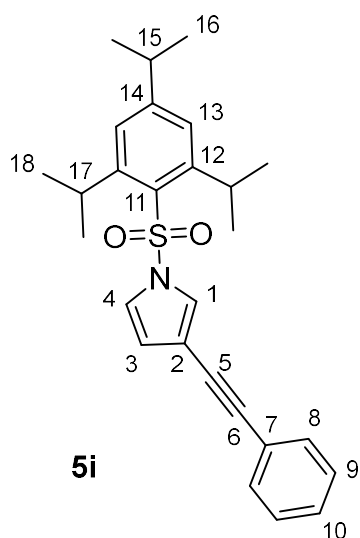

Beige solid, 71%

$^1\text{H}$  NMR (400 MHz,  $\text{CDCl}_3$ )  $\delta$  7.48-7.44 (m, 2H,  $\text{H}^8$ ), 7.35-7.29 (m, 3H,  $\text{H}^9$ ,  $\text{H}^{10}$ ), 7.27-7.25 (m, 1H,  $\text{H}^4$ ) 7.21 (s, 2H,  $\text{H}^{13}$ ), 7.06 (app t,  $J = 2.7$  Hz, 1H,  $\text{H}^1$ ), 6.40 (dd,  $J = 3.2$ , 1.6 Hz, 1H,  $\text{H}^3$ ), 4.14 (hept,  $J = 6.7$  Hz, 2H,  $\text{H}^{17}$ ), 2.92 (hept,  $J = 7.0$  Hz, 1H,  $\text{H}^{15}$ ), 1.26 (d,  $J = 7.0$  Hz, 6H,  $\text{H}^{16}$ ), 1.20 (d,  $J = 6.7$  Hz, 12H,  $\text{H}^{18}$ ) ppm.  $^{13}\text{C}$  NMR (101 MHz,  $\text{CDCl}_3$ )  $\delta$  155.2 ( $\text{C}^{14}$ ), 151.9 ( $\text{C}^{12}$ ), 131.5 ( $\text{C}^8$ ), 130.4 ( $\text{C}^{11}$ ), 128.4 ( $\text{C}^9$ ), 128.2 ( $\text{C}^{10}$ ), 124.6 ( $\text{C}^{13}$ ), 123.4 ( $\text{C}^7$ ), 122.9 ( $\text{C}^4$ ), 120.1 ( $\text{C}^1$ ), 114.8 ( $\text{C}^3$ ), 108.8 ( $\text{C}^2$ ), 89.7 ( $\text{C}^6$ ), 82.9 ( $\text{C}^5$ ), 34.4 ( $\text{C}^{15}$ ), 29.8 ( $\text{C}^{17}$ ), 24.8 ( $\text{C}^{18}$ ), 23.6 ( $\text{C}^{16}$ ) ppm. HRMS (ESI+)  $m/z$  calcd. for ( $\text{C}_{27}\text{H}_{31}\text{NO}_2\text{S}$ ) [ $\text{M}+\text{H}$ ] $^+$  434.2154; found 434.2149. IR (neat) 3145.7, 2850.4, 2237.0, 1292.0, 702.0  $\text{cm}^{-1}$ .

### 2,5-Bis(1-((2,4,6-triisopropylphenyl)sulfonyl)-1H-pyrrol-3-yl)thiophene (5j)

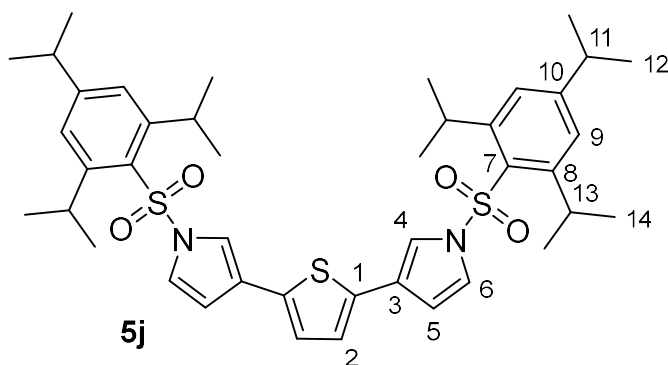

Yellow powder, 63% m.p. 180-185 °C

$^1\text{H}$  NMR (400 MHz,  $\text{CDCl}_3$ )  $\delta$  7.23 (dd,  $J = 2.3$ , 1.7 Hz, 2H,  $\text{H}^4$ ), 7.20 (s, 4H,  $\text{H}^9$ ), 7.07 (dd,  $J = 3.3$ , 2.3 Hz, 2H,  $\text{H}^6$ ), 6.94 (s, 2H,  $\text{H}^2$ ), 6.45 (dd,  $J = 3.3$ , 1.7 Hz, 2H,  $\text{H}^5$ ), 4.17 (hept,  $J = 6.7$  Hz, 4H,  $\text{H}^{13}$ ), 2.91 (hept,  $J = 6.9$  Hz, 2H,  $\text{H}^{11}$ ), 1.26 (d,  $J = 6.9$  Hz, 12H,  $\text{H}^{12}$ ), 1.20 (d,  $J = 6.8$  Hz, 24H,  $\text{H}^{14}$ ) ppm.  $^{13}\text{C}$  NMR (101 MHz,  $\text{CDCl}_3$ )  $\delta$  154.9 ( $\text{C}^{10}$ ), 151.8 ( $\text{C}^8$ ), 135.0 ( $\text{C}^1$ ), 130.8 ( $\text{C}^7$ ), 124.6 ( $\text{C}^9$ ), 123.5 ( $\text{C}^2$ ), 122.3 ( $\text{C}^3$ ), 120.9 ( $\text{C}^6$ ), 115.3 ( $\text{C}^4$ ), 110.9 ( $\text{C}^5$ ), 34.4 ( $\text{C}^{11}$ ), 29.8 ( $\text{C}^{13}$ ), 24.8 ( $\text{C}^{14}$ ), 23.6 ( $\text{C}^{12}$ ) ppm. HRMS (ESI+)  $m/z$  calcd. for ( $\text{C}_{42}\text{H}_{54}\text{N}_2\text{O}_4\text{S}_3$ ) [ $\text{M}+\text{H}$ ] $^+$  747.3319, found 747.3326. IR (neat) 2954.2, 2925.8, 1551.1, 1171.3, 837.0  $\text{cm}^{-1}$ .

### 2-Phenyl-1-(*p*-toluenesulfonyl)-1*H*-pyrrole (7a)

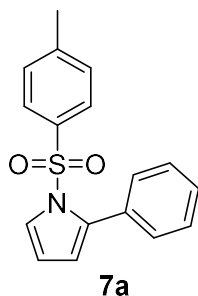

White powder, 71%

$^1\text{H}$  NMR (400 MHz,  $\text{CDCl}_3$ )  $\delta$  7.45 (dd,  $J = 3.5, 1.7$  Hz, 1H), 7.39 – 7.20 (m, 8H), 7.10 (d,  $J = 8.1$  Hz, 2H), 6.31 (app t,  $J = 3.3$  Hz, 1H), 6.16 (dd,  $J = 3.4, 1.8$  Hz, 1H), 2.36 (s, 3H) ppm. Data in agreement with those previously reported.<sup>9</sup>

### 2-(4-(Benzyloxy)phenyl)-1-(*p*-toluenesulfonyl)-1*H*-pyrrole (7b)

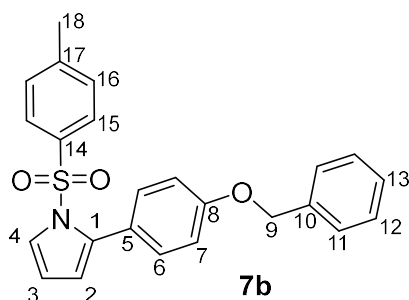

White powder, 54%, m.p. 110-113 °C

$^1\text{H}$  NMR (400 MHz,  $\text{CDCl}_3$ )  $\delta$  7.48 (d,  $J = 7.0$  Hz, 2H,  $\text{H}^{11}$ ), 7.45–7.40 (m, 3H,  $\text{H}^{4,12}$ ), 7.36 (t,  $J = 7.2$  Hz, 1H,  $\text{H}^{13}$ ), 7.22 (d,  $J = 8.3$  Hz, 2H,  $\text{H}^{15}$ ), 7.14 (d,  $J = 8.1$  Hz, 2H,  $\text{H}^6$ ), 7.07 (d,  $J = 8.1$  Hz, 2H,  $\text{H}^{16}$ ), 6.91 (d,  $J = 8.1$  Hz, 1H,  $\text{H}^7$ ), 6.29 (dd,  $J = 3.3, 0.9$  Hz, 1H,  $\text{H}^3$ ), 6.10 (dd,  $J = 3.3, 1.6$  Hz, 1H,  $\text{H}^2$ ), 5.12 (s, 2H,  $\text{H}^9$ ), 2.34 (s, 3H,  $\text{H}^{18}$ ) ppm.  $^{13}\text{C}$  NMR (101 MHz,  $\text{CDCl}_3$ )  $\delta$  158.8 ( $\text{C}^8$ ), 144.6 ( $\text{C}^{17}$ ), 136.9 ( $\text{C}^{14}$ ), 135.71 ( $\text{C}^1/\text{C}^{10}$ ), 135.69 ( $\text{C}^1/\text{C}^{10}$ ), 132.3 ( $\text{C}^6$ ), 129.3 ( $\text{C}^{16}$ ), 128.7 ( $\text{C}^{12}$ ), 128.1 ( $\text{C}^{13}$ ), 127.6 ( $\text{C}^{11}$ ), 127.2 ( $\text{C}^{15}$ ), 124.0 ( $\text{C}^5$ ), 123.7 ( $\text{C}^4$ ), 115.3 ( $\text{C}^2$ ), 113.8 ( $\text{C}^7$ ), 111.9 ( $\text{C}^3$ ), 70.0 ( $\text{C}^9$ ), 21.6 ( $\text{C}^{18}$ ) ppm. HRMS (ESI+)  $m/z$  calcd. for  $(\text{C}_{24}\text{H}_{21}\text{NO}_3\text{S})$   $[\text{M}+\text{H}]^+$  404.1318, found 404.1316. IR (neat) 1507.8, 1131.0, 1064.3, 748.8, 670.1  $\text{cm}^{-1}$

### 2-(4-Chlorophenyl)-1-(*p*-toluenesulfonyl)-1*H*-pyrrole (7c)

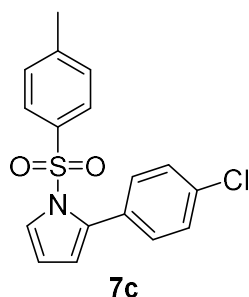

Pale yellow solid, 51%

$^1\text{H}$  NMR (400 MHz,  $\text{CDCl}_3$ )  $\delta$  7.44 (dd,  $J = 3.4, 1.7$  Hz, 1H), 7.32–7.22 (m, 4H), 7.17 (d,  $J = 8.5$  Hz, 2H), 7.12 (d,  $J = 7.8$  Hz, 2H), 6.30 (app t,  $J = 3.3$  Hz, 1H), 6.15 (dd,  $J = 3.3, 1.8$  Hz, 1H), 2.36 (s, 3H) ppm. Data in agreement with those previously reported.<sup>10</sup>

### 2-(Thiophen-2-yl)-1-(*p*-toluenesulfonyl)-1*H*-pyrrole (7d)

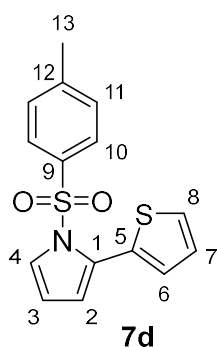

White powder, 70%, m.p. 61-64 °C

$^1\text{H}$  NMR (500 MHz,  $\text{CDCl}_3$ )  $\delta$  7.49 (dd,  $J = 3.3, 1.9$  Hz, 1H,  $\text{H}^4$ ), 7.31 (d,  $J = 8.4$  Hz, 2H,  $\text{H}^{10}$ ), 7.28 (dd,  $J = 5.2, 1.2$  Hz, 1H,  $\text{H}^8$ ), 7.14 (dd,  $J = 3.6, 1.2$  Hz, 1H,  $\text{H}^6$ ), 7.12 (d,  $J = 7.9$  Hz, 2H,  $\text{H}^{11}$ ), 7.03 (dd,  $J = 5.2, 3.6$  Hz, 1H,  $\text{H}^7$ ), 6.33–6.25 (m, 2H,  $\text{H}^{2,3}$ ), 2.36 (s, 3H,  $\text{H}^{13}$ ) ppm.  $^{13}\text{C}$  NMR (126 MHz,  $\text{CDCl}_3$ )  $\delta$  144.9 ( $\text{C}^{12}$ ), 135.5 ( $\text{C}^9$ ), 131.3 ( $\text{C}^5$ ), 130.5 ( $\text{C}^6$ ), 129.6 ( $\text{C}^{11}$ ), 127.4 ( $\text{C}^{10}$ ), 127.0 ( $\text{C}^7/\text{C}^8$ ), 126.9 ( $\text{C}^7/\text{C}^8$ ), 124.7 ( $\text{C}^4$ ), 117.6 ( $\text{C}^2/\text{C}^3$ ), 113.6 ( $\text{C}^1$ ), 111.6 ( $\text{C}^2/\text{C}^3$ ), 21.8 ( $\text{C}^{13}$ ) ppm. HRMS (ESI+)  $m/z$  calcd. for ( $\text{C}_{15}\text{H}_{13}\text{NO}_2\text{S}_2$ ) [ $\text{M}+\text{H}$ ]<sup>+</sup> 304.0461, found 304.0463. IR (neat) 2920.3, 2853.6, 1440.3, 998.0  $\text{cm}^{-1}$

**2-(Furan-2-yl)-1-(*p*-toluenesulfonyl)-1*H*-pyrrole (7e)**

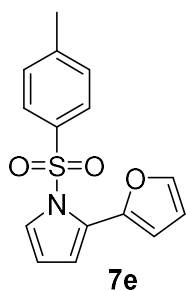

Pale yellow solid, 58%

$^1\text{H}$  NMR (400 MHz,  $\text{CDCl}_3$ )  $\delta$  7.52 (d,  $J = 8.1$  Hz, 2H), 7.46–7.44 (m, 1H), 7.40–7.39 (m, 1H), 7.20 (d,  $J = 8.1$  Hz, 2H), 6.59 (d,  $J = 3.6$  Hz, 1H), 6.45–6.42 (m, 2H), 6.32–6.30 (m, 1H), 2.38 (s, 3H) ppm. Data in agreement with those previously reported.<sup>11</sup>

**2-(Prop-1-yn-1-yl)-1-(*p*-toluenesulfonyl)-1*H*-pyrrole (7f)**

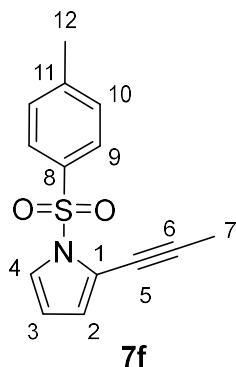

White powder, 65%, m.p. 100-105 °C

$^1\text{H}$  NMR (400 MHz,  $\text{CDCl}_3$ )  $\delta$  7.82 (d,  $J = 8.4$  Hz, 2H,  $\text{H}^9$ ), 7.34–7.28 (m, 3H,  $\text{H}^{4,10}$ ), 6.38 (dd,  $J = 3.6, 1.7$  Hz, 1H,  $\text{H}^2$ ), 6.17 (app t,  $J = 3.4$  Hz, 1H,  $\text{H}^3$ ), 2.42 (s, 3H,  $\text{H}^{12}$ ), 2.07 (s, 3H,  $\text{H}^7$ ) ppm.  $^{13}\text{C}$  NMR (101 MHz,  $\text{CDCl}_3$ )  $\delta$  145.3 ( $\text{C}^8$ ), 135.7 ( $\text{C}^{11}$ ), 129.8 ( $\text{C}^{10}$ ), 127.9 ( $\text{C}^9$ ), 122.7 ( $\text{C}^4$ ), 120.1 ( $\text{C}^2$ ), 116.2 ( $\text{C}^1$ ), 111.4 ( $\text{C}^3$ ), 91.9 ( $\text{C}^6$ ), 70.2 ( $\text{C}^5$ ), 21.9 ( $\text{C}^{12}$ ), 4.9 ( $\text{C}^7$ ) ppm. HRMS (ESI+)  $m/z$  calcd. for ( $\text{C}_{14}\text{H}_{13}\text{NO}_2\text{S}$ )  $[\text{M}+\text{Na}]^+$  282.0565, found 282.0560. IR (neat) 1292.4, 1177.6, 1053.1, 702.3  $\text{cm}^{-1}$



### 1-(5-Phenyl-1-(*p*-toluenesulfonyl)-1*H*-pyrrol-3-yl)ethan-1-one (14)

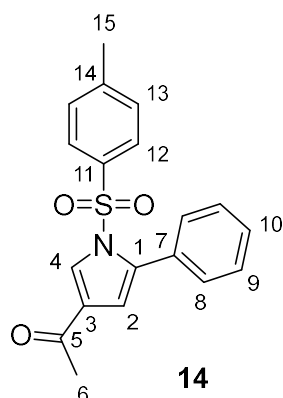

White powder, 65%, m.p. 108-111 °C

$^1\text{H}$  NMR (400 MHz,  $\text{CDCl}_3$ )  $\delta$  8.05 (d,  $J = 1.9$  Hz, 1H,  $\text{H}^4$ ), 7.42–7.34 (m, 1H,  $\text{H}^{10}$ ), 7.31-7.26 (m, 2H,  $\text{H}^9$ ), 7.20 (d,  $J = 8.5$  Hz, 2H,  $\text{H}^{12}$ ), 7.18–7.14 (m, 2H,  $\text{H}^8$ ), 7.10 (d,  $J = 8.2$  Hz, 2H,  $\text{H}^{13}$ ), 6.53 (d,  $J = 2.0$  Hz, 1H,  $\text{H}^2$ ), 2.47 (s, 3H,  $\text{H}^6$ ), 2.37 (s, 3H,  $\text{H}^{15}$ ) ppm.  $^{13}\text{C}$  NMR (101 MHz,  $\text{CDCl}_3$ )  $\delta$  193.2 ( $\text{C}^5$ ), 145.7 ( $\text{C}^{14}$ ), 136.8 ( $\text{C}^1$ ), 134.8 ( $\text{C}^{11}$ ), 131.3 ( $\text{C}^8$ ), 130.4 ( $\text{C}^7$ ), 129.8 ( $\text{C}^{13}$ ), 129.0 ( $\text{C}^{10}$ ), 127.8 ( $\text{C}^9/\text{C}^{12}$ ), 127.7 ( $\text{C}^9/\text{C}^{12}$ ), 127.6 ( $\text{C}^4$ ), 127.1 ( $\text{C}^3$ ), 113.7 ( $\text{C}^2$ ), 27.3 ( $\text{C}^6$ ), 21.8 ( $\text{C}^{15}$ ) ppm. HRMS (ESI+)  $m/z$  calcd. for ( $\text{C}_{19}\text{H}_{17}\text{NO}_3\text{S}$ ) [ $\text{M}+\text{H}$ ] $^+$  340.1002, found 340.1000. IR (neat) 2925.3, 1704.5, 1449.4, 1326.6, 1011.5, 837.8  $\text{cm}^{-1}$ .

### 2-(Furan-2-yl)-1-(*p*-toluenesulfonyl)-1,5,6,7-tetrahydro-4*H*-indol-4-one (15)

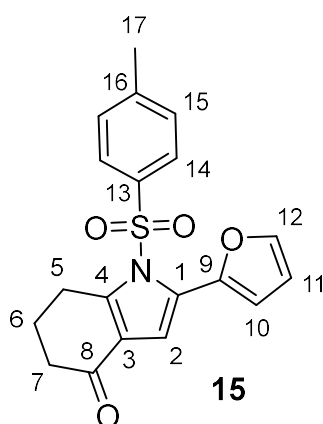

Beige powder, 66%, m.p. 177-180 °C

$^1\text{H}$  NMR (400 MHz,  $\text{CDCl}_3$ )  $\delta$  7.79 (d,  $J = 8.4$  Hz, 2H,  $\text{H}^{14}$ ), 7.63 (s, 1H,  $\text{H}^2$ ), 7.40 (dd,  $J = 3.4, 0.8$  Hz, 1H,  $\text{H}^{10}$ ), 7.38-7.33 (m, 3H,  $\text{H}^{15,12}$ ), 6.43 (dd,  $J = 3.4, 1.8$  Hz, 1H,  $\text{H}^{11}$ ), 3.01 (t,  $J = 6.2$  Hz, 2H,  $\text{H}^5$ ), 2.50-2.45 (m, 2H,  $\text{H}^7$ ), 2.44 (s, 3H,  $\text{H}^{17}$ ), 2.09 (tt,  $J = 7.8, 6.4$  Hz, 2H,  $\text{H}^6$ ) ppm.  $^{13}\text{C}$  NMR (101 MHz,  $\text{CDCl}_3$ )  $\delta$  194.0 ( $\text{C}^8$ ), 147.6 ( $\text{C}^9$ ), 146.2 ( $\text{C}^{16}$ ), 144.7 ( $\text{C}^4$ ), 141.4 ( $\text{C}^{12}$ ), 135.2 ( $\text{C}^{13}$ ), 130.6 ( $\text{C}^{15}$ ), 127.4 ( $\text{C}^{14}$ ), 120.6 ( $\text{C}^3$ ), 118.6 ( $\text{C}^2$ ), 116.8 ( $\text{C}^1$ ), 111.7 ( $\text{C}^{11}$ ), 110.8 ( $\text{C}^{10}$ ), 38.7 ( $\text{C}^7$ ), 23.4 ( $\text{C}^5$ ), 23.0 ( $\text{C}^6$ ), 21.9 ( $\text{C}^{17}$ ) ppm. HRMS (ESI+)  $m/z$  calcd. for ( $\text{C}_{19}\text{H}_{17}\text{NO}_4\text{S}$ ) [ $\text{M}+\text{H}$ ] $^+$  356.0951; found 356.0958. IR (neat) 2922.9, 1671.4, 14336, 1258.8, 821.1  $\text{cm}^{-1}$ .

### 1-Methyl-4-phenyl-1*H*-pyrrole-2-carbaldehyde (**16**)

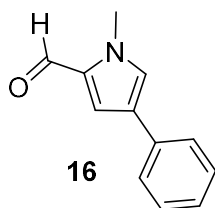

White powder, 30% conv.

$^1\text{H}$  NMR (400 MHz,  $\text{CDCl}_3$ )  $\delta$  9.69 (s, 1H), 7.51–7.47 (m, 2H), 7.47 (dd,  $J = 7.7, 7.7$  Hz, 2H), 7.34–7.29 (m, 1H), 7.27–7.25 (m, 2H), 4.08 (s, 3H) ppm. **16** clearly identifiable in crude  $^1\text{H}$ -NMR spectrum, but only trace amounts of pure product isolated from column (most **16** co-eluted with **17**). Data in agreement with those previously reported.<sup>12</sup>

### 4-((2-([1,1'-Biphenyl]-2-ylthio)phenyl)thio)-1-methyl-1*H*-pyrrole-2-carbaldehyde (**17**)

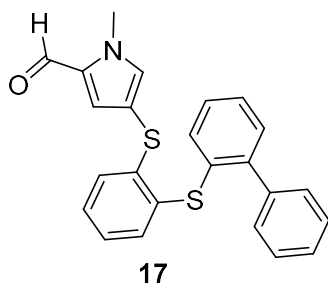

White powder, 30% conv, m.p. 97-101 °C

$^1\text{H}$  NMR (400 MHz,  $\text{CDCl}_3$ )  $\delta$  9.55 (s, 1H), 7.53–7.46 (m, 2H), 7.45–7.34 (m, 3H), 7.33–7.27 (m, 2H), 7.25–7.20 (m, 2H), 7.19–7.10 (m, 1H), 7.08–7.00 (m, 2H), 6.97 (s, 2H), 6.92 (dd,  $J = 8.0, 1.4$  Hz, 1H), 3.96 (s, 3H) ppm.  $^{13}\text{C}$  NMR (101 MHz,  $\text{CDCl}_3$ )  $\delta$  179.7, 143.5, 142.5, 140.6, 137.1, 134.7, 134.6, 133.2, 131.7, 130.7, 129.8, 129.5, 129.4, 128.7, 128.20, 128.17, 127.7, 127.1, 126.5, 126.0, 110.9, 37.0 ppm. HRMS (ESI<sup>+</sup>): calc.  $\text{C}_{24}\text{H}_{19}\text{NOS}_2^+$   $[\text{M}+\text{Na}]^+$  424.0806, found 424.0819. IR (neat) 2961.3, 1666.4, 1289.5, 705.7  $\text{cm}^{-1}$ . Only trace amounts of pure product isolated from column (most **17** co-eluted with **16**).

**3-((2-([1,1'-Biphenyl]-2-ylthio)phenyl)thio)-1,2,5-trimethyl-1H-pyrrole (18)**

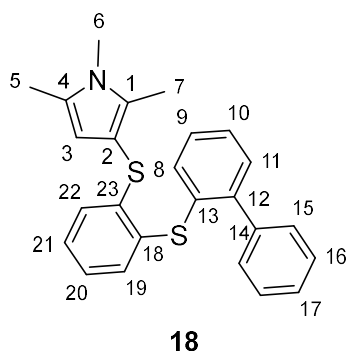

White powder, 78% NMR conv

$^1\text{H}$  NMR (400 MHz,  $\text{CDCl}_3$ )  $\delta$  7.53 (d,  $J = 6.9$  Hz, 2H,  $\text{H}^{15}$ ), 7.43 (app t,  $J = 7.5$  Hz, 2H,  $\text{H}^{16}$ ), 7.37 (t,  $J = 7.3$  Hz, 1H,  $\text{H}^{17}$ ), 7.29–7.16 (m, 4H,  $\text{H}^{8-11}$ ), 7.10 (app td,  $J = 7.6, 1.4$  Hz, 1H,  $\text{H}^{21}$ ), 7.00 (dd,  $J = 7.5, 1.6$  Hz, 1H,  $\text{H}^{19}$ ), 6.96 (ddd,  $J = 7.5, 7.5, 1.4$  Hz, 1H,  $\text{H}^{20}$ ), 6.77 (dd,  $J = 8.0, 1.4$  Hz, 1H,  $\text{H}^{22}$ ), 5.88 (s, 1H,  $\text{H}^3$ ), 3.44 (s, 3H,  $\text{H}^6$ ), 2.22 (s, 3H,  $\text{H}^5$ ), 2.12 (s, 3H,  $\text{H}^7$ ) ppm.  $^{13}\text{C}$  NMR (126 MHz,  $\text{CDCl}_3$ )  $\delta$  146.6 ( $\text{C}^{18}$ ), 141.6 ( $\text{C}^{13}$ ), 140.8 ( $\text{C}^{14}$ ), 135.5 ( $\text{C}^{12}$ ), 135.2 ( $\text{C}^8$  or  $\text{C}^{11}$ ), 134.0 ( $\text{C}^1$ ), 130.5 ( $\text{C}^8$  or  $\text{C}^{11}$ ), 129.6 ( $\text{C}^{15}$ ), 129.4 ( $\text{C}^{23}$ ), 128.74 ( $\text{C}^{21}$ ), 128.70 ( $\text{C}^4$ ), 128.6 ( $\text{C}^{19}$ ), 128.2 ( $\text{C}^{16}$ ), 128.0 ( $\text{C}^9$  or  $\text{C}^{10}$ ), 127.6 ( $\text{C}^{17}$ ), 125.9 ( $\text{C}^9$  or  $\text{C}^{10}$ ), 125.7 ( $\text{C}^{22}$ ), 124.7 ( $\text{C}^{20}$ ), 111.5 ( $\text{C}^3$ ), 102.9 ( $\text{C}^2$ ), 31.2 ( $\text{C}^6$ ), 12.6 ( $\text{C}^5$ ), 10.6 ( $\text{C}^7$ ) ppm. HRMS (ESI+)  $m/z$  calcd. for ( $\text{C}_{25}\text{H}_{23}\text{NS}_2$ )  $[\text{M}+\text{Na}]^+$  424.1170, found 424.1164. Only trace amounts of pure product isolated from column, melting point and IR data not obtained.

## Deprotection of 3-(4-Fluorophenyl)-1-((2,4,6-triisopropylphenyl)sulfonyl)-1H-pyrrole

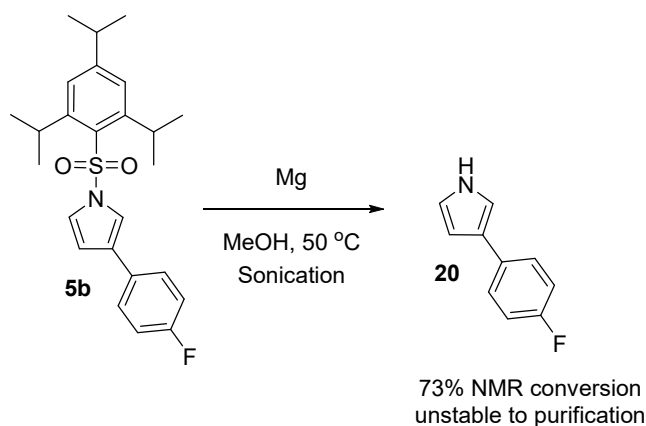

### Procedure:

3-(4-Fluorophenyl)-1-((2,4,6-triisopropylphenyl)sulfonyl)-1H-pyrrole **5b** (0.176 mmol, 75 mg) was added to magnesium metal (3.52 mmol, 61 mg) in dry methanol (2.2 ml). The flask was then sonicated for 5 hours at 50 °C. The reaction mixture was poured onto 1M HCl (aq) then neutralised with 1M NaHCO<sub>3</sub> (aq) and extracted with CH<sub>2</sub>Cl<sub>2</sub> (x3). The mixture was then dried over MgSO<sub>4</sub> and filtered, then the filtrate was concentrated *in vacuo*. Trimethoxybenzene internal standard (0.059 mmol) was added, from a stock solution to the crude mixture. A conversion of 73% to desired product was determined by integration of the <sup>1</sup>H-NMR spectrum. Attempted further purification by chromatography on silica led to decomposition of the product.

### 3-(4-Fluorophenyl)-1H-pyrrole **20**

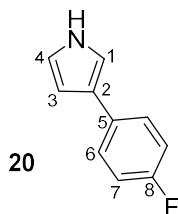

Crude brown solid, 73% NMR conv

<sup>1</sup>H NMR (400 MHz, CDCl<sub>3</sub>) δ 8.33 (br s, 1H, N-H), 7.48 (dd, *J* = 8.5, 5.5 Hz, 2H, H<sup>6</sup>), 7.06-6.98 (m, 3H, H<sup>1</sup>, H<sup>7</sup>), 6.84-6.81 (m, 1H, H<sup>4</sup>), 6.52-6.46 (m, 1H, H<sup>3</sup>) ppm. <sup>13</sup>C NMR (101 MHz, CDCl<sub>3</sub>) δ 161.4 (d, <sup>1</sup>*J*<sub>CF</sub> = 243.4 Hz, C<sup>8</sup>), 132.1 (C<sup>5</sup>), 126.8 (d, <sup>3</sup>*J*<sub>CF</sub> = 7.8 Hz, C<sup>6</sup>), 124.3 (C<sup>2</sup>), 119.1 (C<sup>4</sup>), 115.5 (d, <sup>2</sup>*J*<sub>CF</sub> = 21.3 Hz, C<sup>7</sup>), 114.4 (C<sup>1</sup>), 106.7 (C<sup>3</sup>) ppm. HRMS (ESI+) *m/z* calcd. for (C<sub>10</sub>H<sub>7</sub>FN) [M-H]<sup>-</sup> 160.0568; found 160.0563.

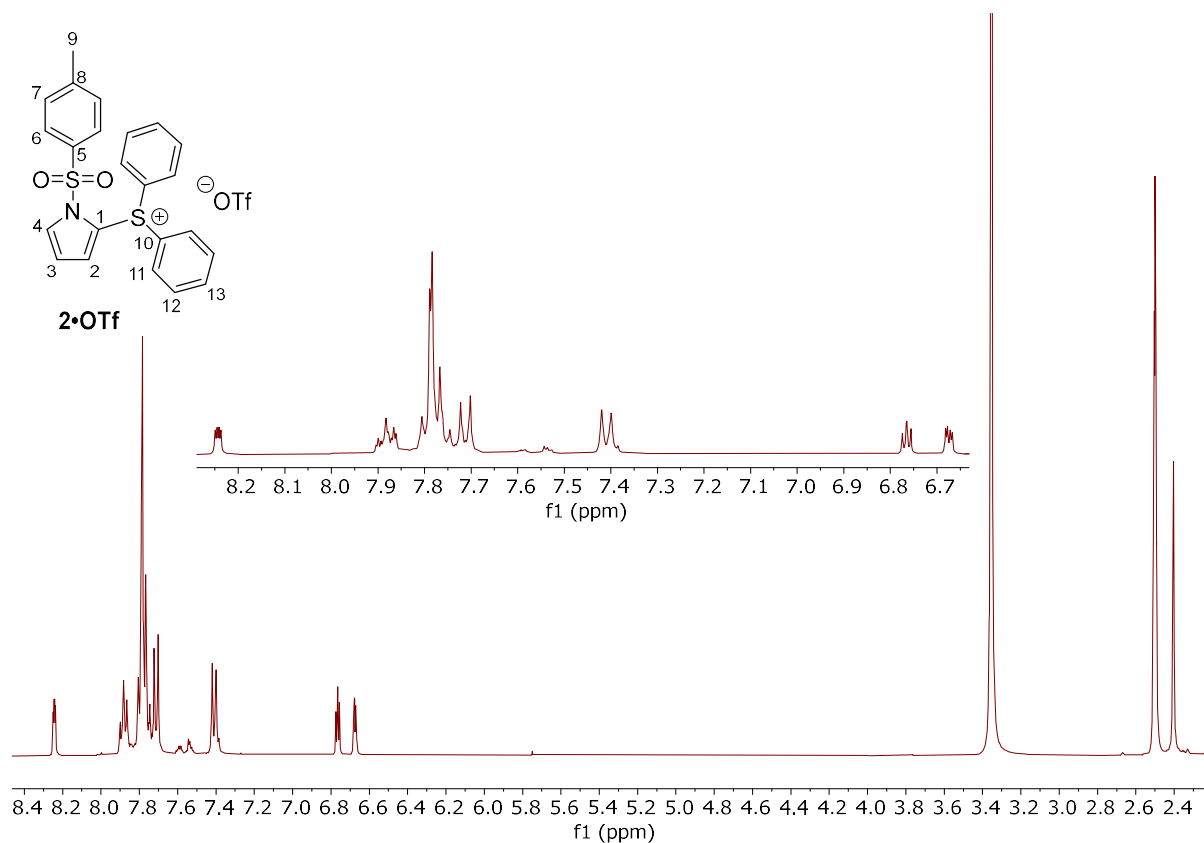

Figure S1: <sup>1</sup>H-NMR spectrum of Diphenyl(1-(p-toluenesulfonyl)-1H-pyrrol-2-yl)sulfonium trifluoromethanesulfonate **2•OTf** in DMSO-d<sub>6</sub>

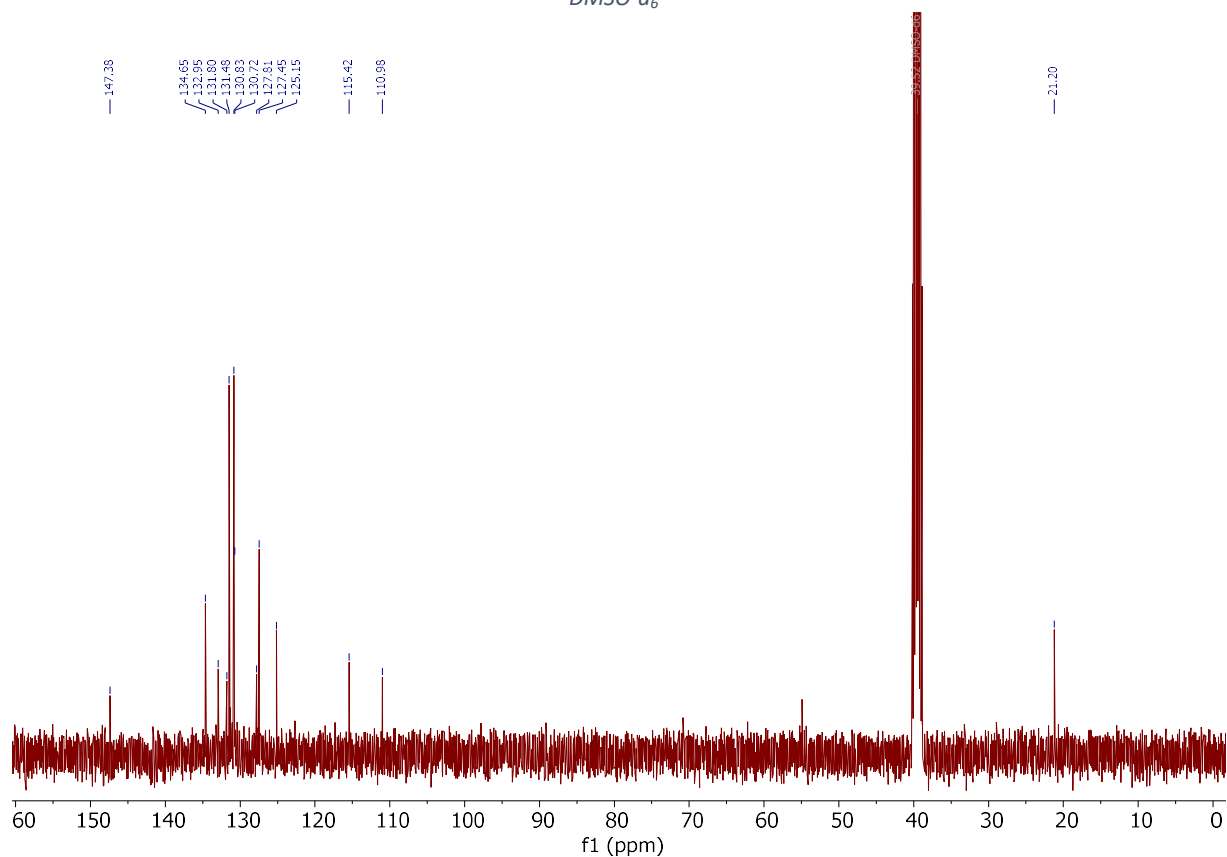

Figure S2: <sup>13</sup>C-NMR spectrum of Diphenyl(1-(p-toluenesulfonyl)-1H-pyrrol-2-yl)sulfonium trifluoromethanesulfonate **2•OTf** in DMSO-d<sub>6</sub>

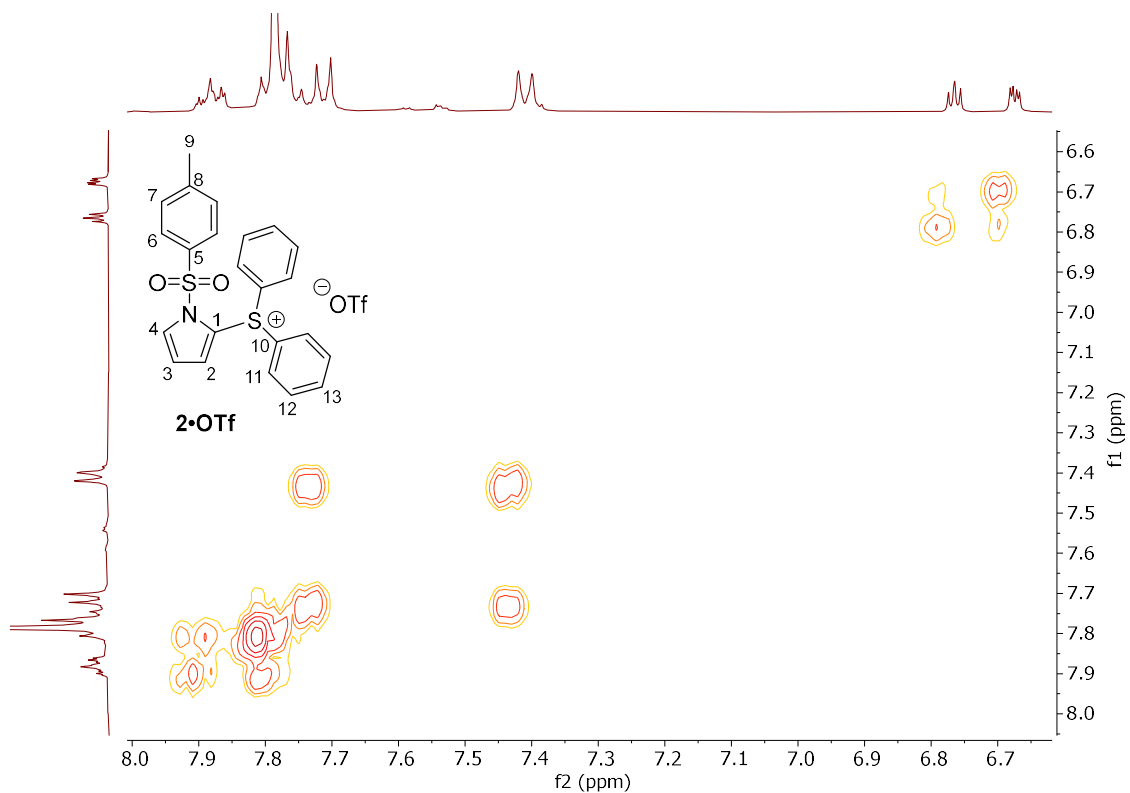

Figure S3: COSY NMR spectrum of Diphenyl(1-(p-toluenesulfonyl)-1H-pyrrol-2-yl)sulfonium trifluoromethanesulfonate **2•OTf** in DMSO- $d_6$

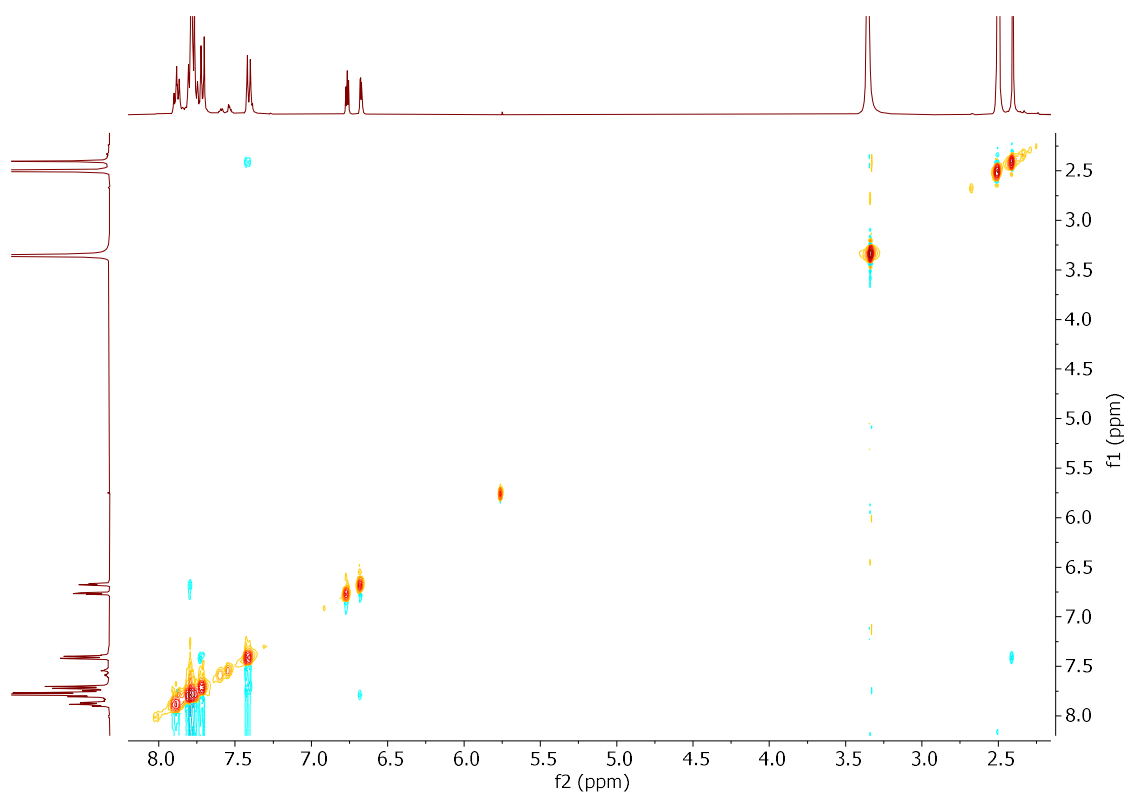

Figure S4: NOESY NMR spectrum of Diphenyl(1-(p-toluenesulfonyl)-1H-pyrrol-2-yl)sulfonium trifluoromethanesulfonate **2•OTf** in DMSO- $d_6$

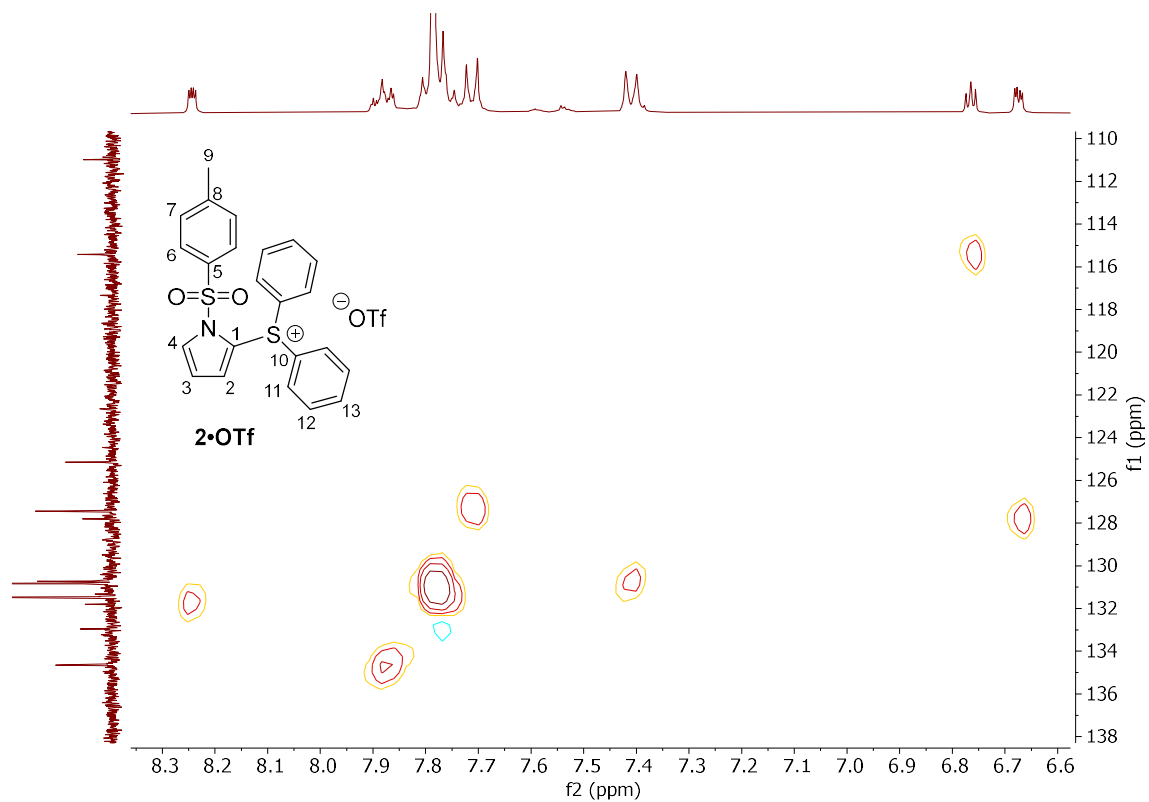

Figure S5: HSQC NMR spectrum of Diphenyl(1-(p-toluenesulfonyl)-1H-pyrrol-2-yl)sulfonium trifluoromethanesulfonate **2•OTf** in DMSO- $d_6$

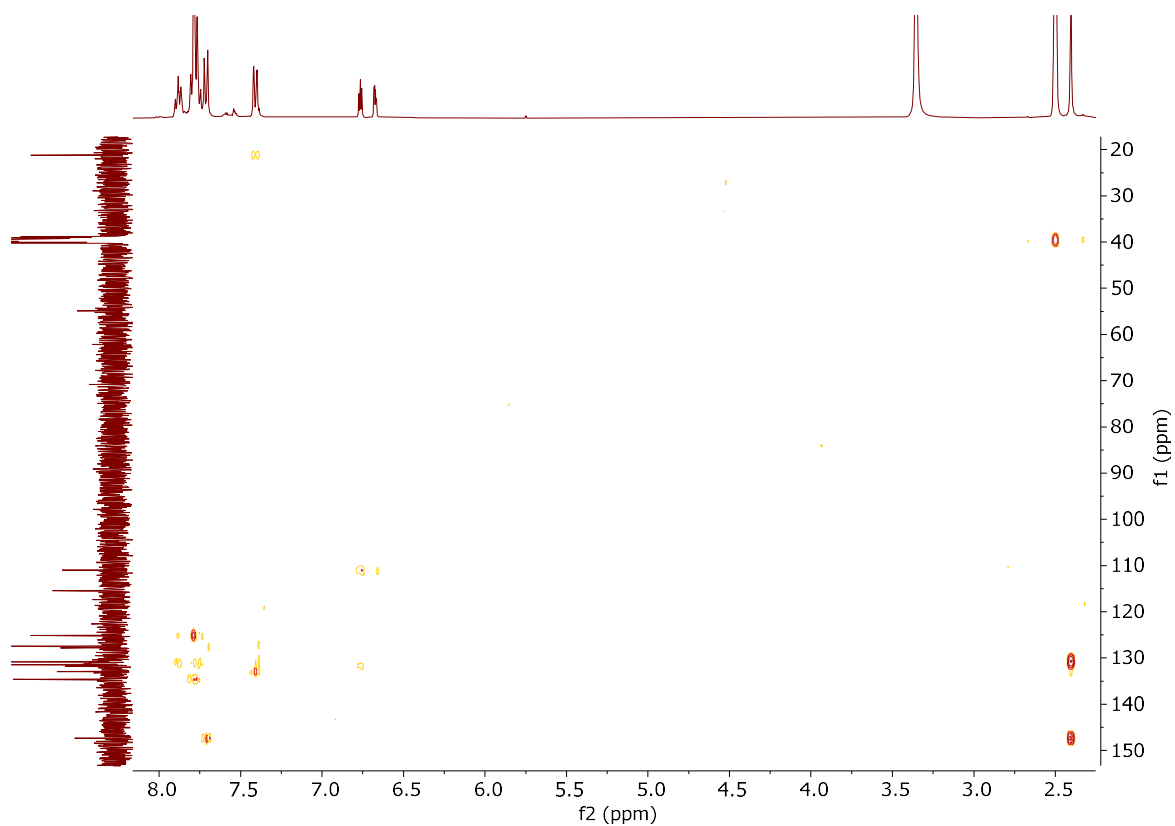

Figure S6: HMBC NMR spectrum of Diphenyl(1-(p-toluenesulfonyl)-1H-pyrrol-2-yl)sulfonium trifluoromethanesulfonate **2•OTf** in DMSO- $d_6$

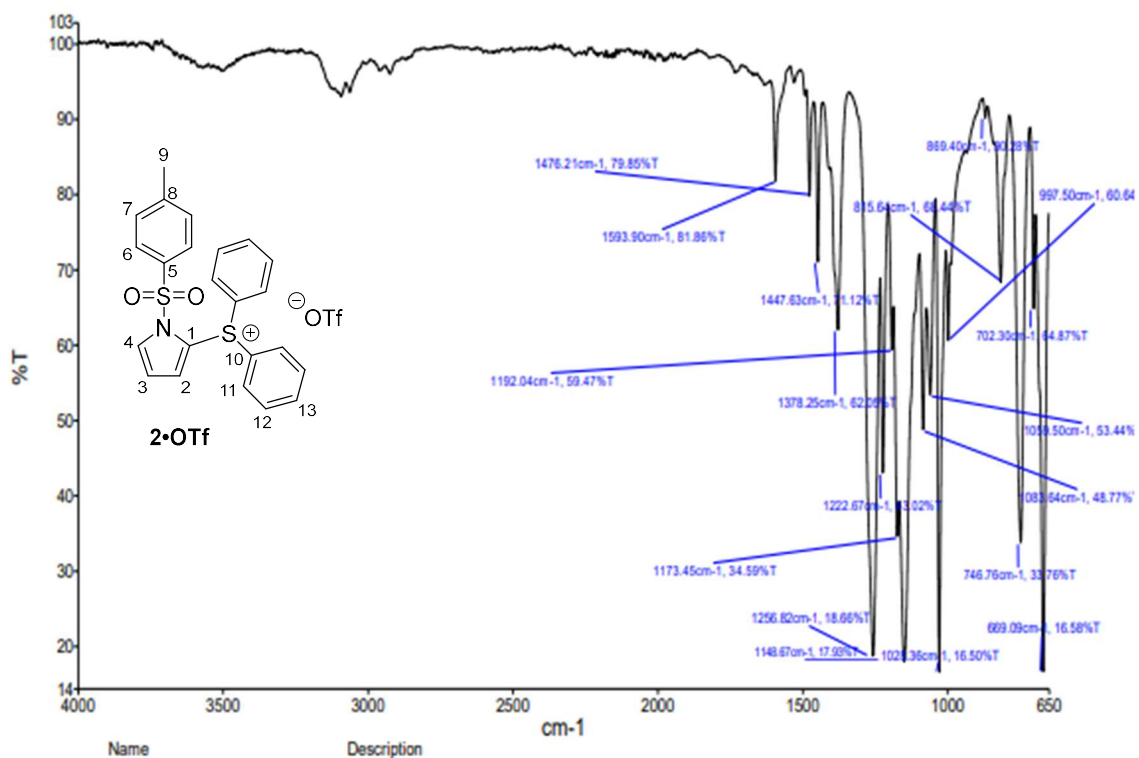

Figure S7: IR spectrum of Diphenyl(1-(p-toluenesulfonyl)-1H-pyrrol-2-yl)sulfonium trifluoromethanesulfonate **2•OTf**



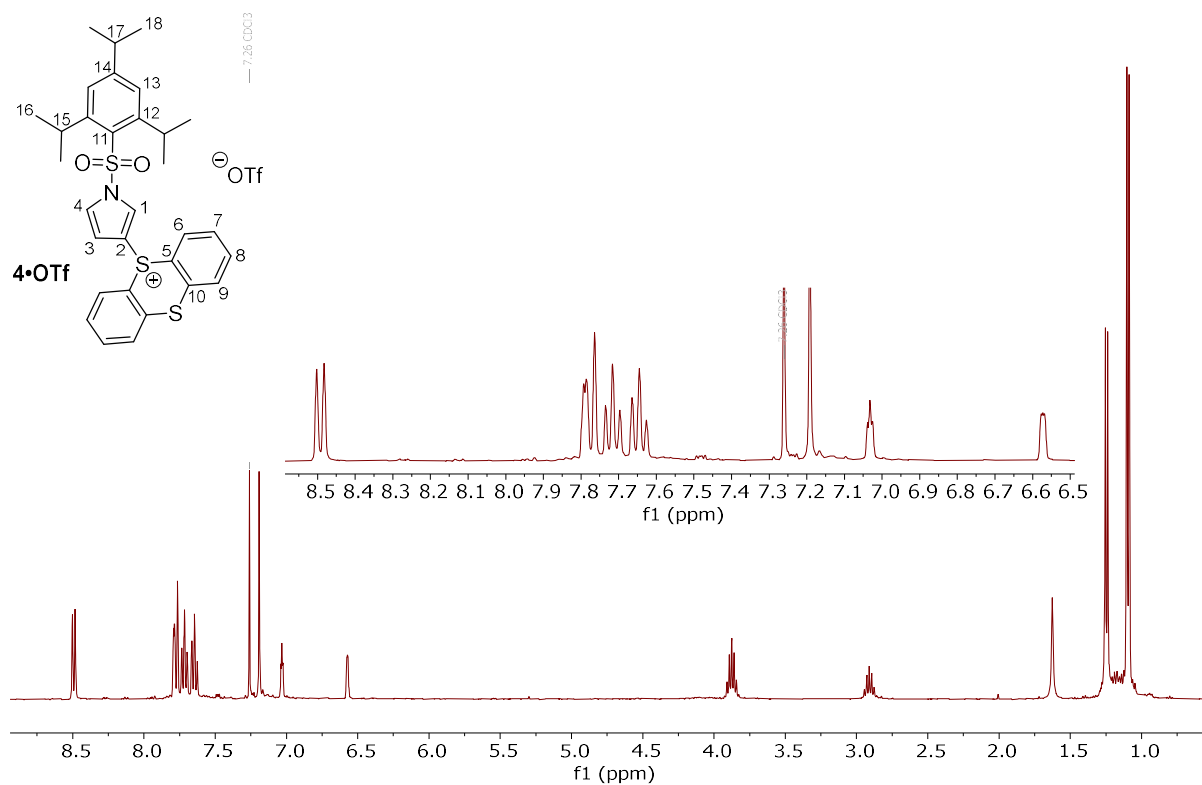

Fig S8: <sup>1</sup>H NMR spectrum of 5-(1-((2,4,6-triisopropylphenyl)sulfonyl)-1H-pyrrol-3-yl)-5H-thianthren-5-ium trifluoromethanesulfonate **4•OTf** in CDCl<sub>3</sub>

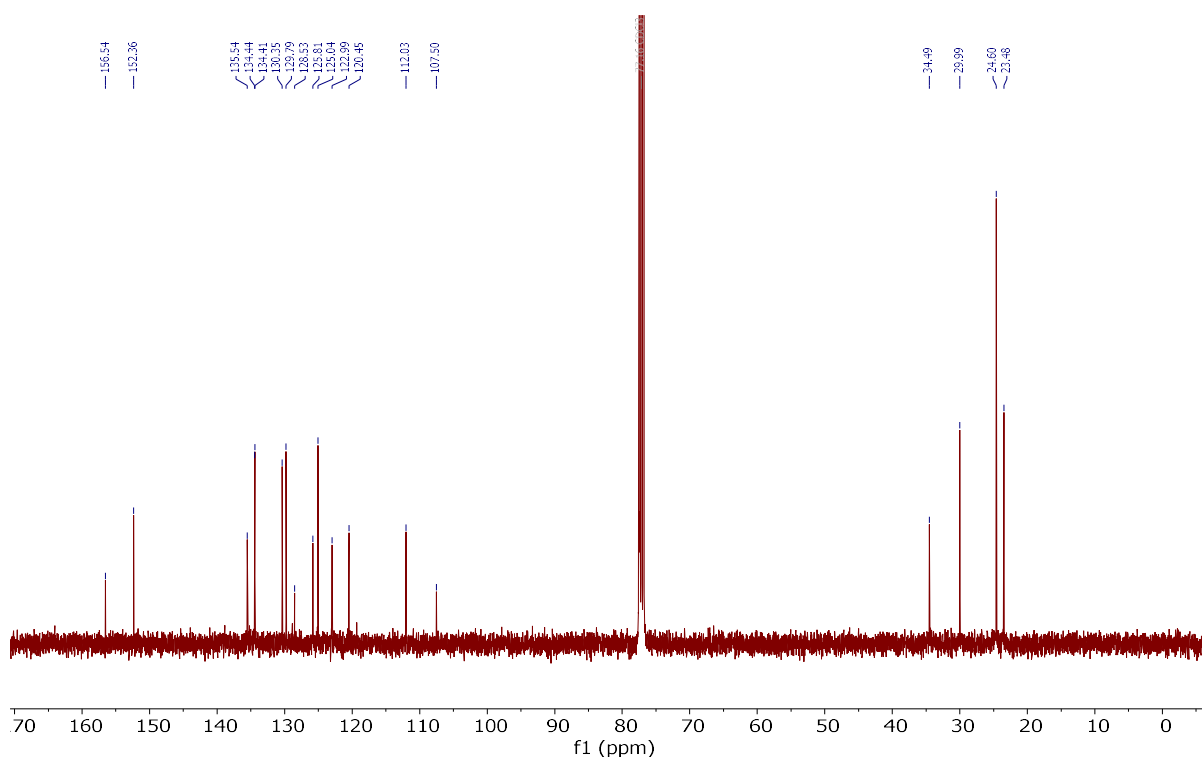

Fig S9: <sup>13</sup>C NMR spectrum of 5-(1-((2,4,6-triisopropylphenyl)sulfonyl)-1H-pyrrol-3-yl)-5H-thianthren-5-ium trifluoromethanesulfonate **4•OTf** in CDCl<sub>3</sub>

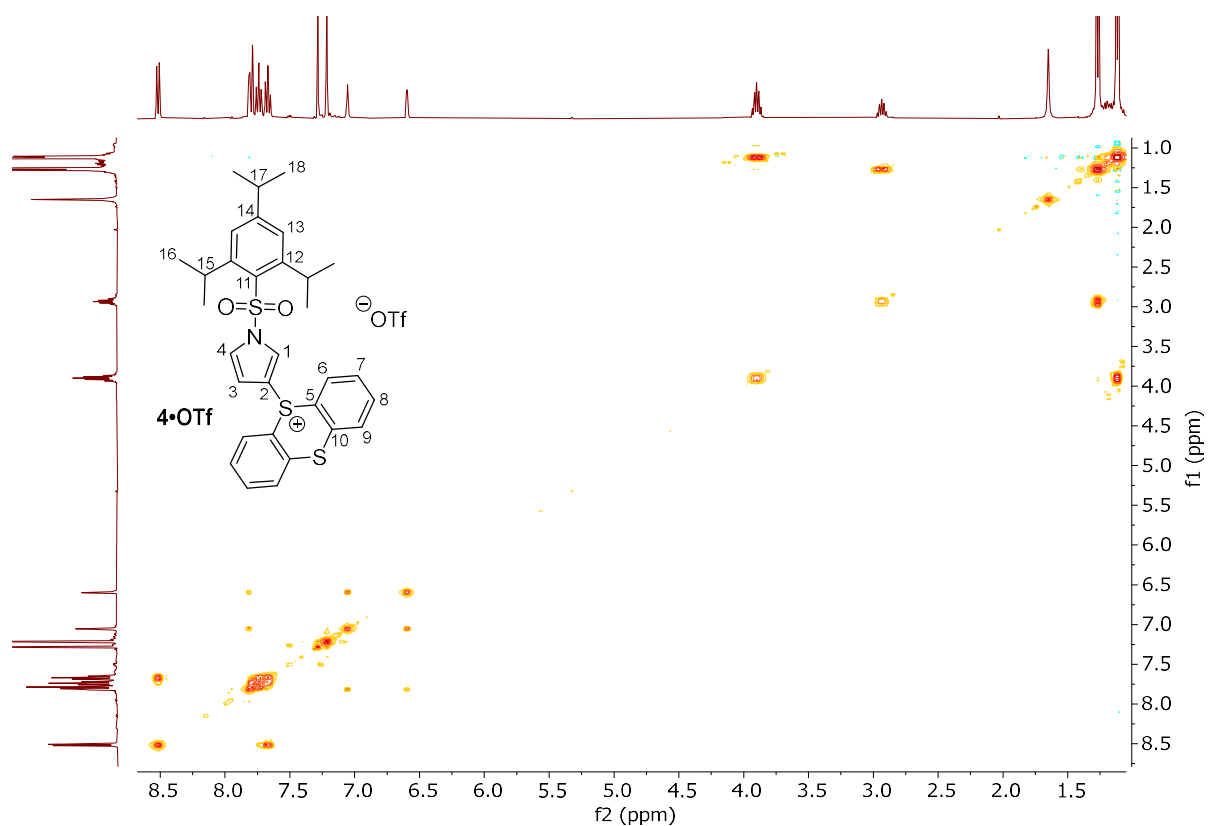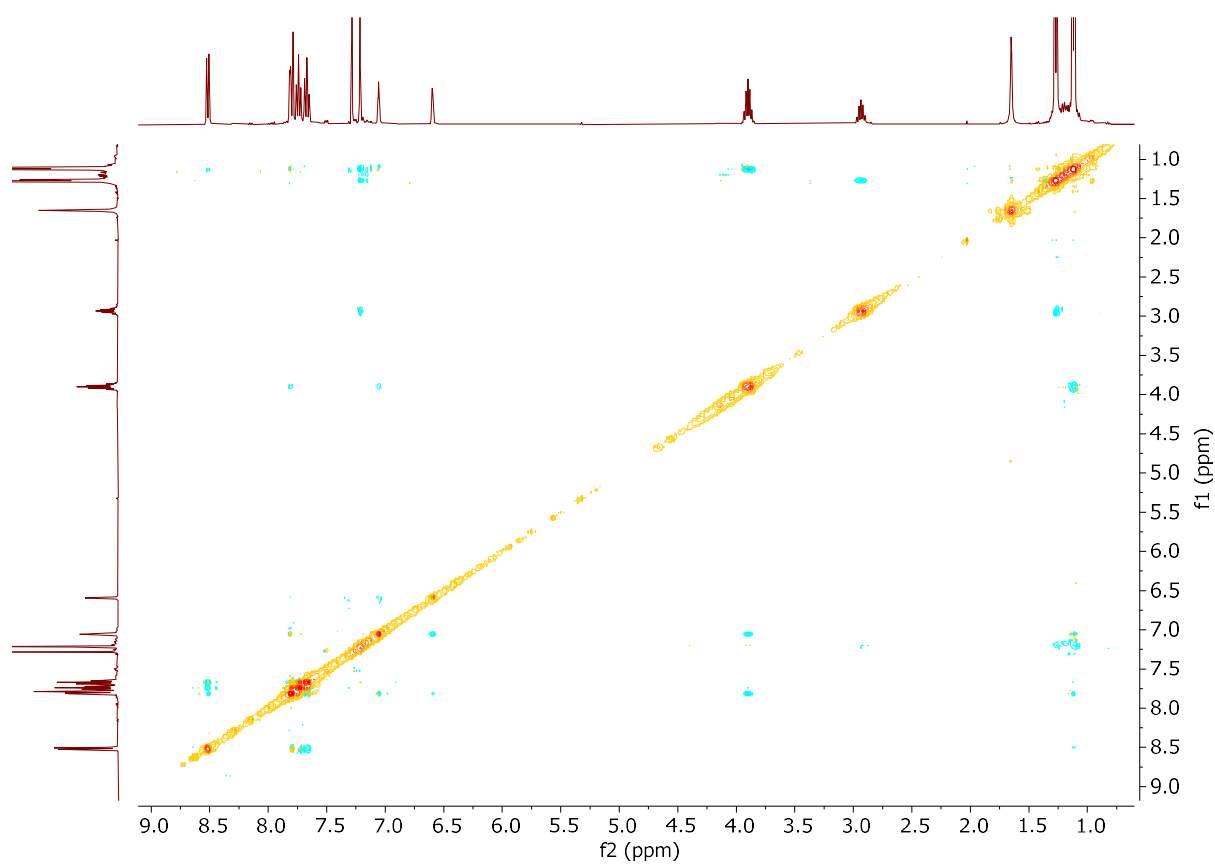

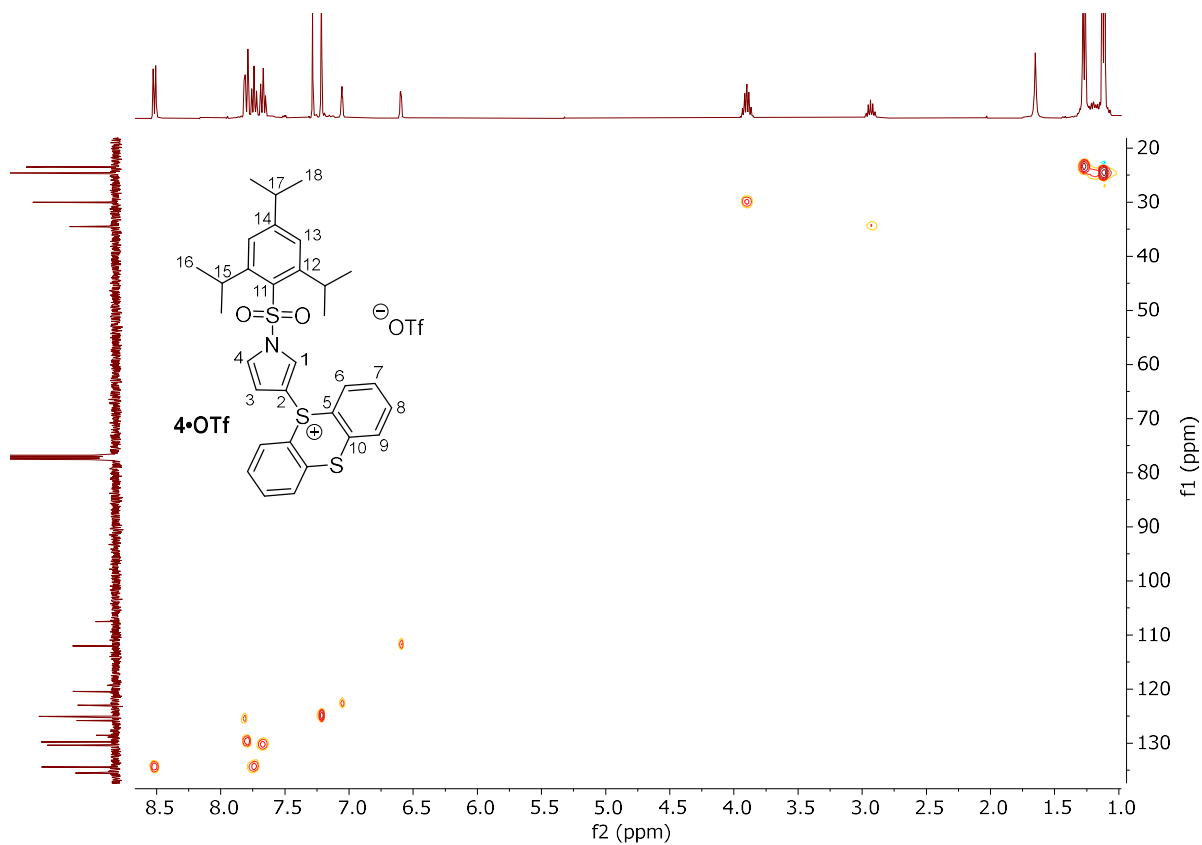

Fig S12: HSQC NMR spectrum of 5-(1-((2,4,6-triisopropylphenyl)sulfonyl)-1H-pyrrol-3-yl)-5H-thianthren-5-ium trifluoromethanesulfonate **4•OTf** in CDCl<sub>3</sub>

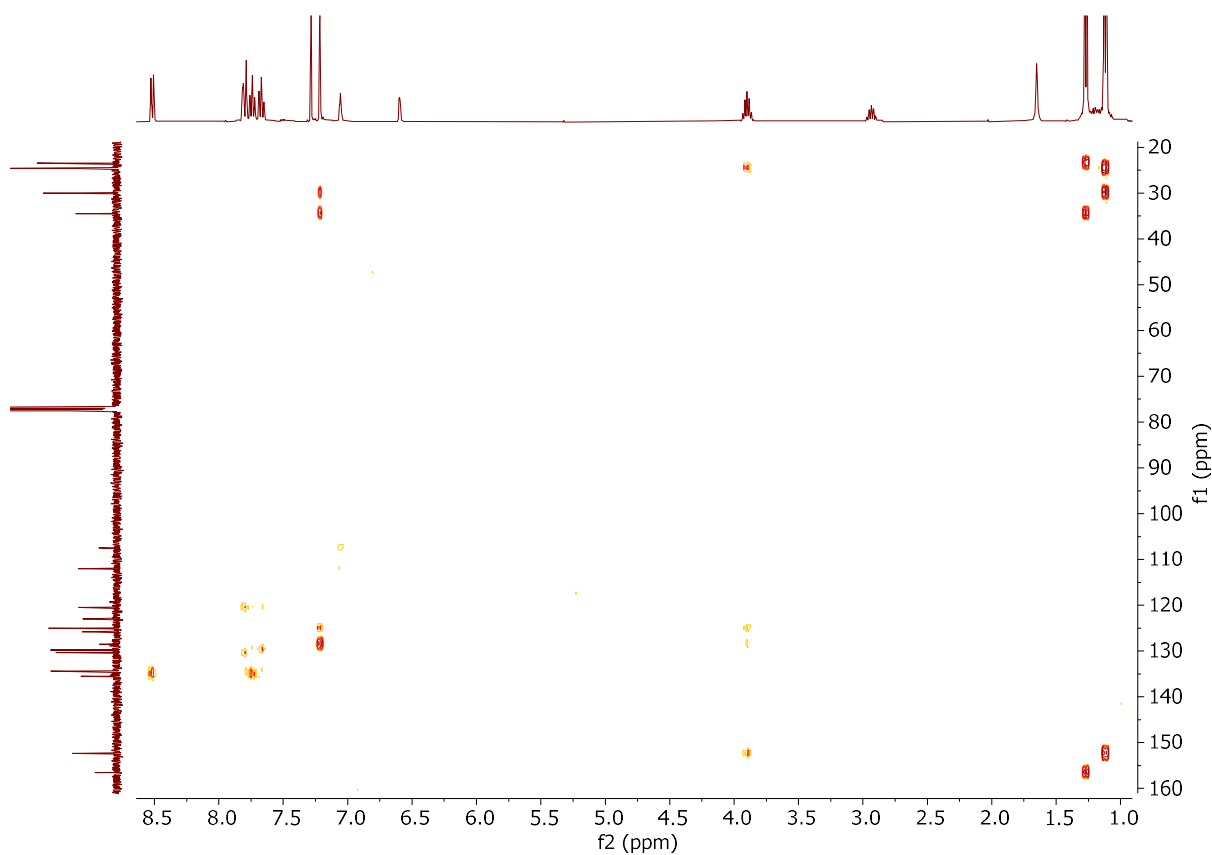

Fig S13: HMBC NMR spectrum of 5-(1-((2,4,6-triisopropylphenyl)sulfonyl)-1H-pyrrol-3-yl)-5H-thianthren-5-ium trifluoromethanesulfonate **4•OTf** in CDCl<sub>3</sub>

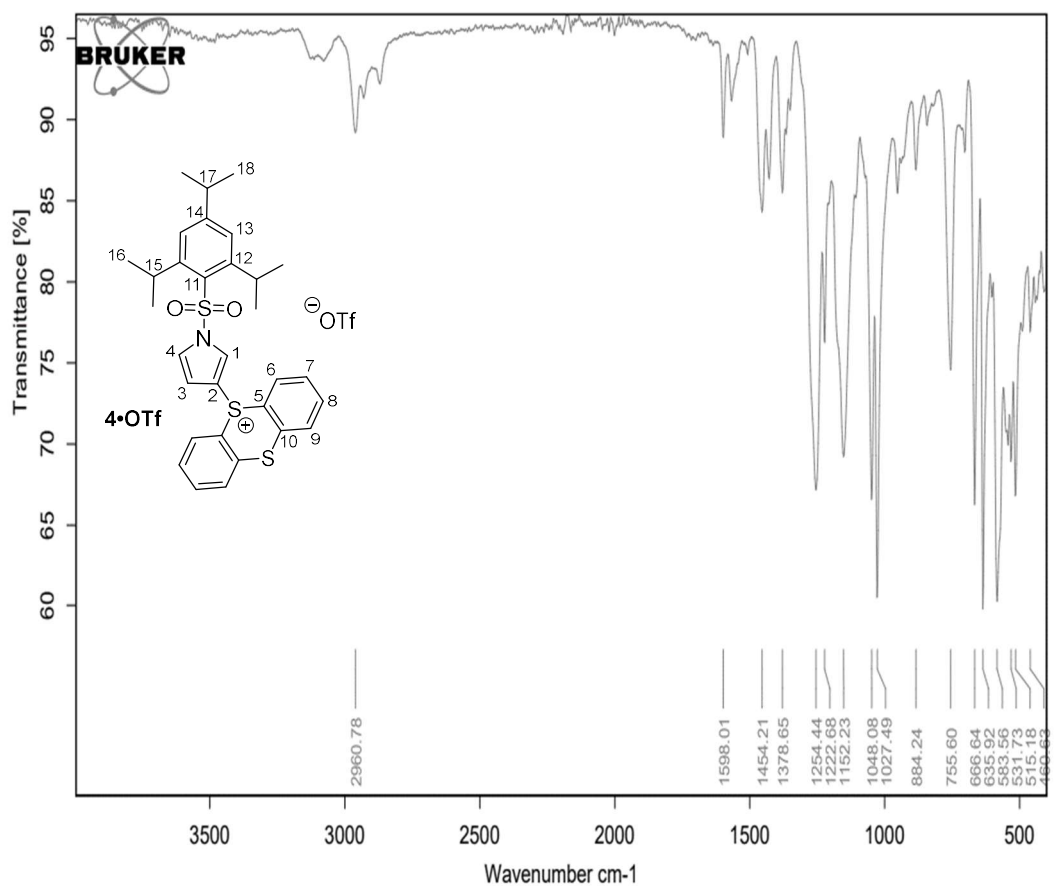

Fig S14: IR spectrum of 5-(1-((2,4,6-triisopropylphenyl)sulfonyl)-1H-pyrrol-3-yl)-5H-thianthren-5-ium trifluoromethanesulfonate **4•OTf**.

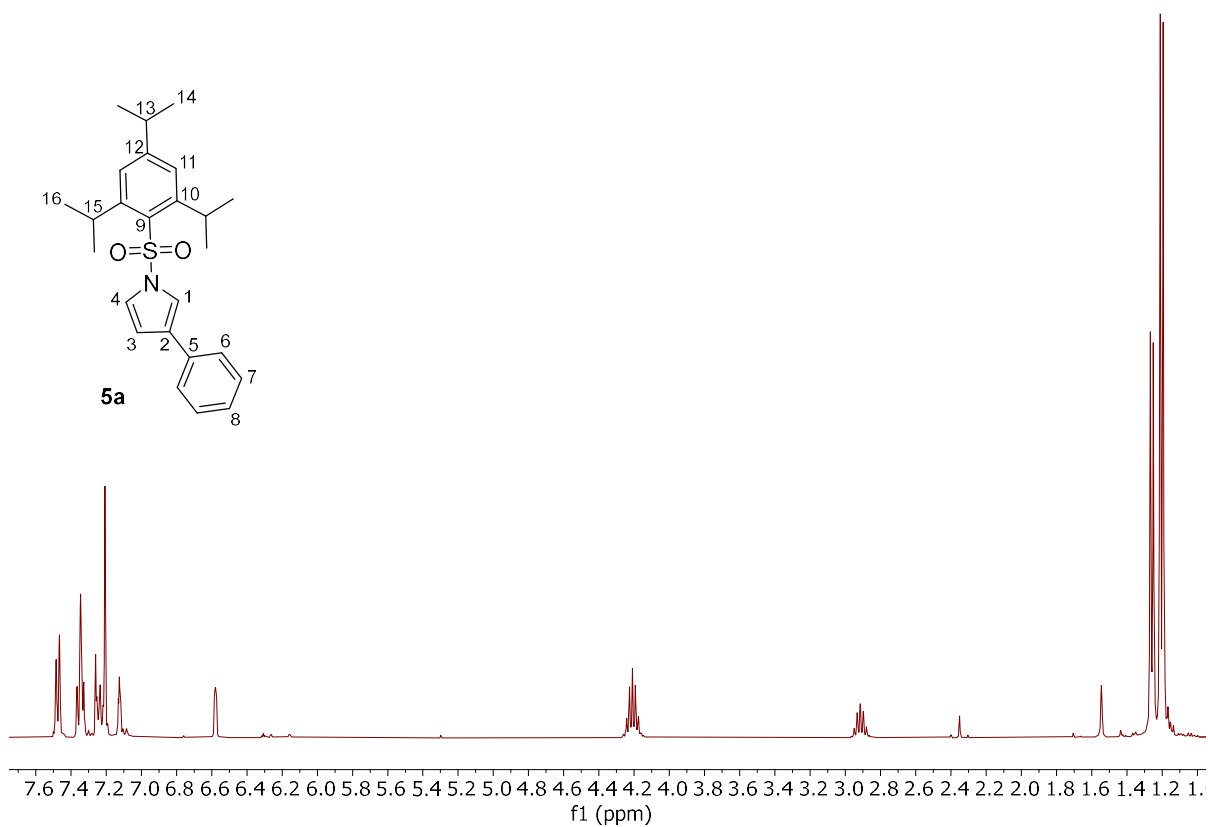

Figure S15:  $^1\text{H}$  NMR spectrum of 3-phenyl-1-((2,4,6-triisopropylphenyl)sulfonyl)-1H-pyrrole **5a** in  $\text{CDCl}_3$

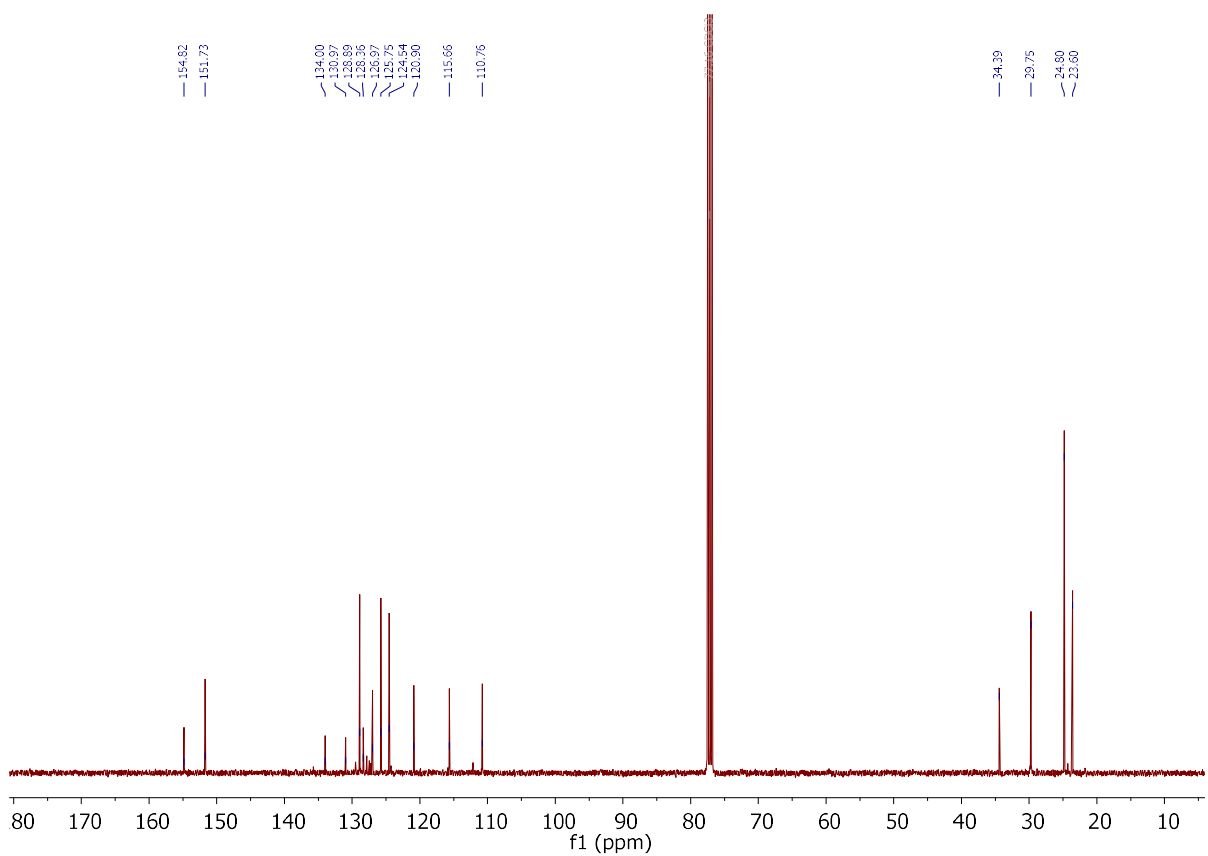

Figure S16:  $^{13}\text{C}$  NMR spectrum of 3-phenyl-1-((2,4,6-triisopropylphenyl)sulfonyl)-1H-pyrrole **5a** in  $\text{CDCl}_3$

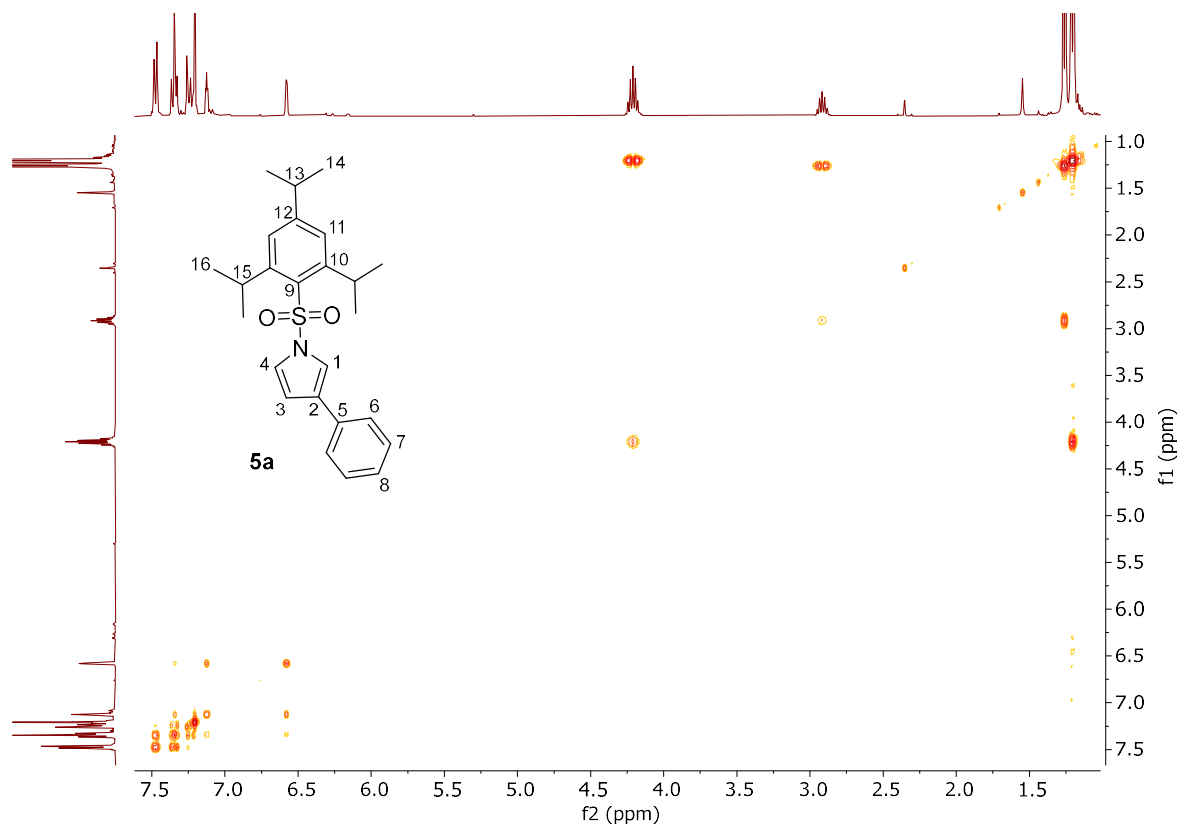

Figure S17: COSY NMR spectrum of 3-phenyl-1-((2,4,6-triisopropylphenyl)sulfonyl)-1H-pyrrole **5a** in  $\text{CDCl}_3$

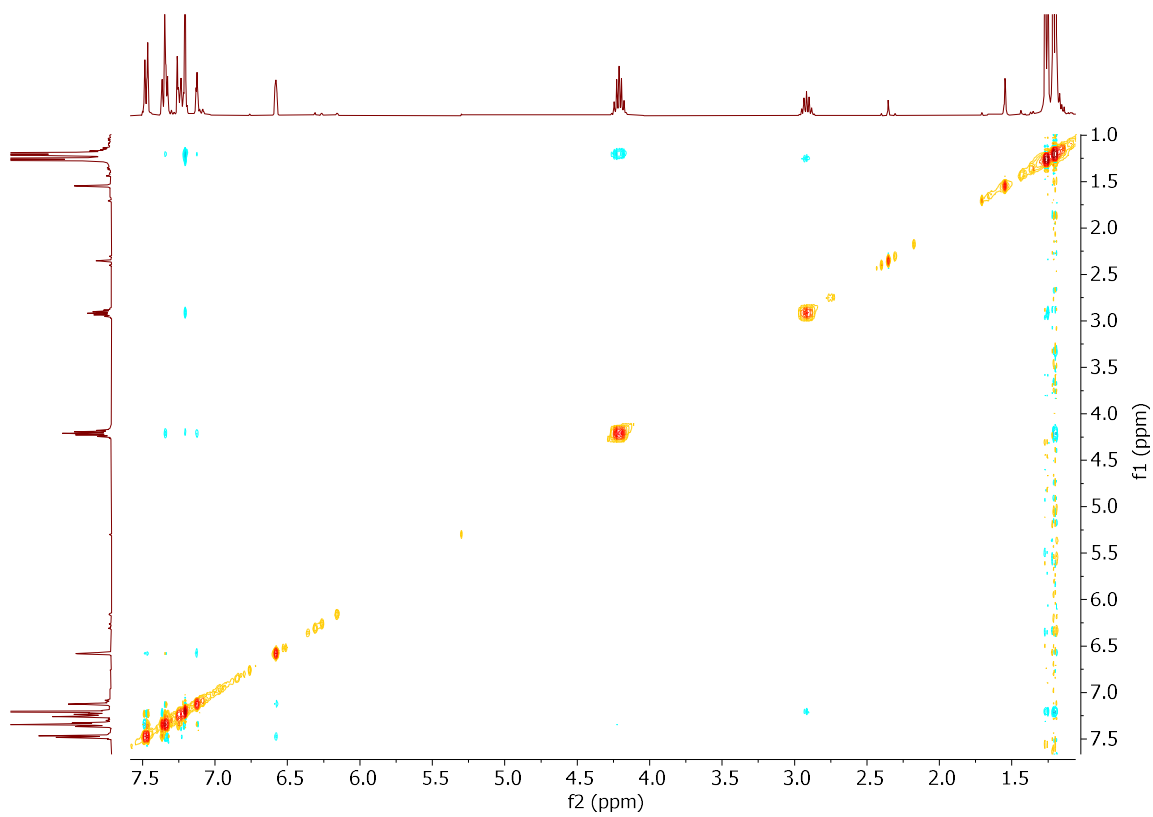

Figure S18: NOESY NMR spectrum of 3-phenyl-1-((2,4,6-triisopropylphenyl)sulfonyl)-1H-pyrrole **5a** in  $\text{CDCl}_3$

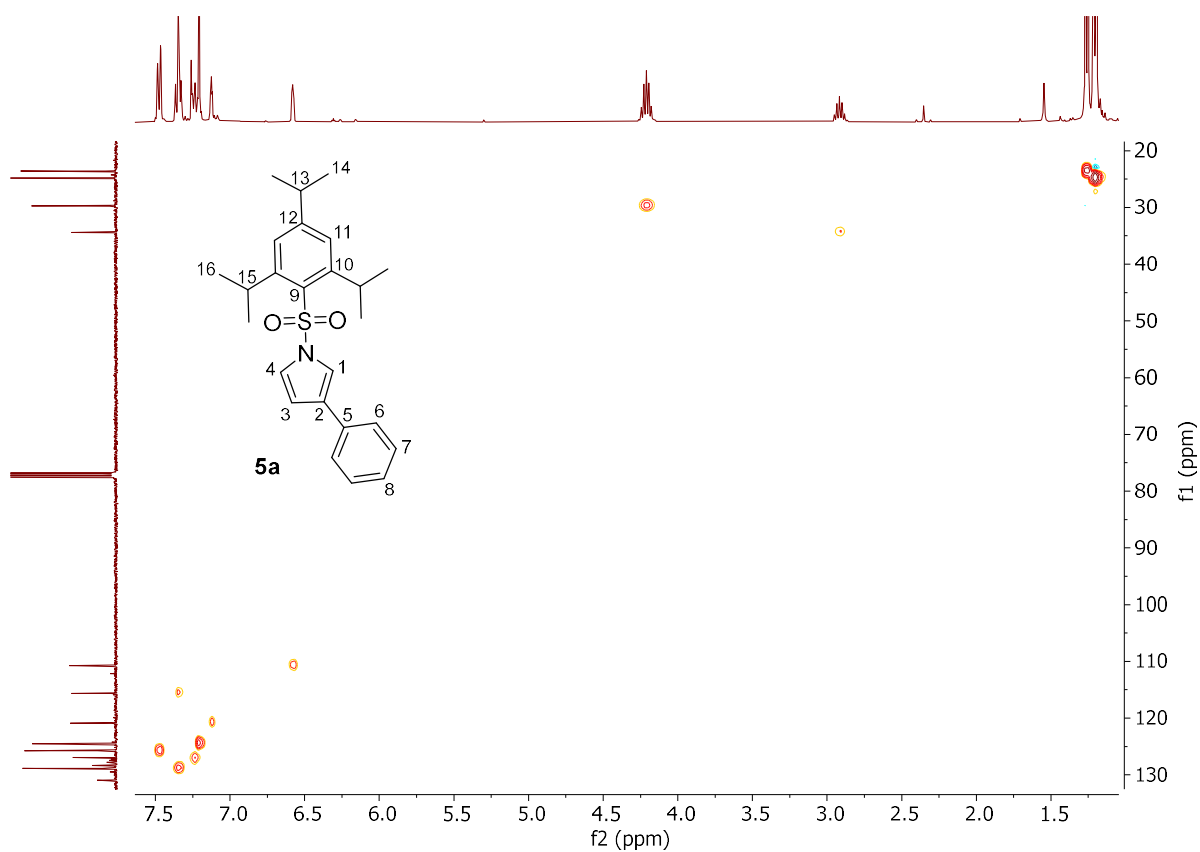

Figure S19: HSQC NMR spectrum of 3-phenyl-1-((2,4,6-triisopropylphenyl)sulfonyl)-1H-pyrrole **5a** in CDCl<sub>3</sub>

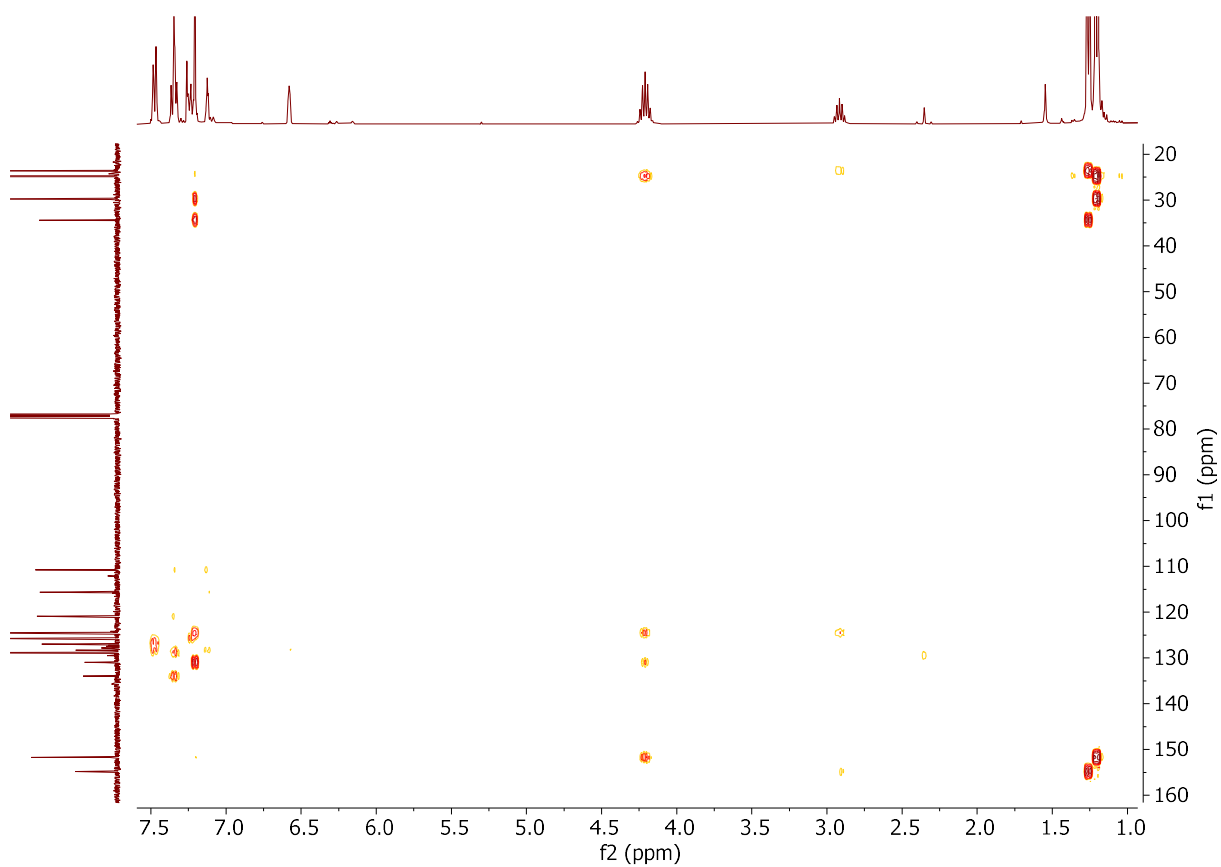

Figure S20: HMBC NMR spectrum of 3-phenyl-1-((2,4,6-triisopropylphenyl)sulfonyl)-1H-pyrrole **5a** in CDCl<sub>3</sub>.

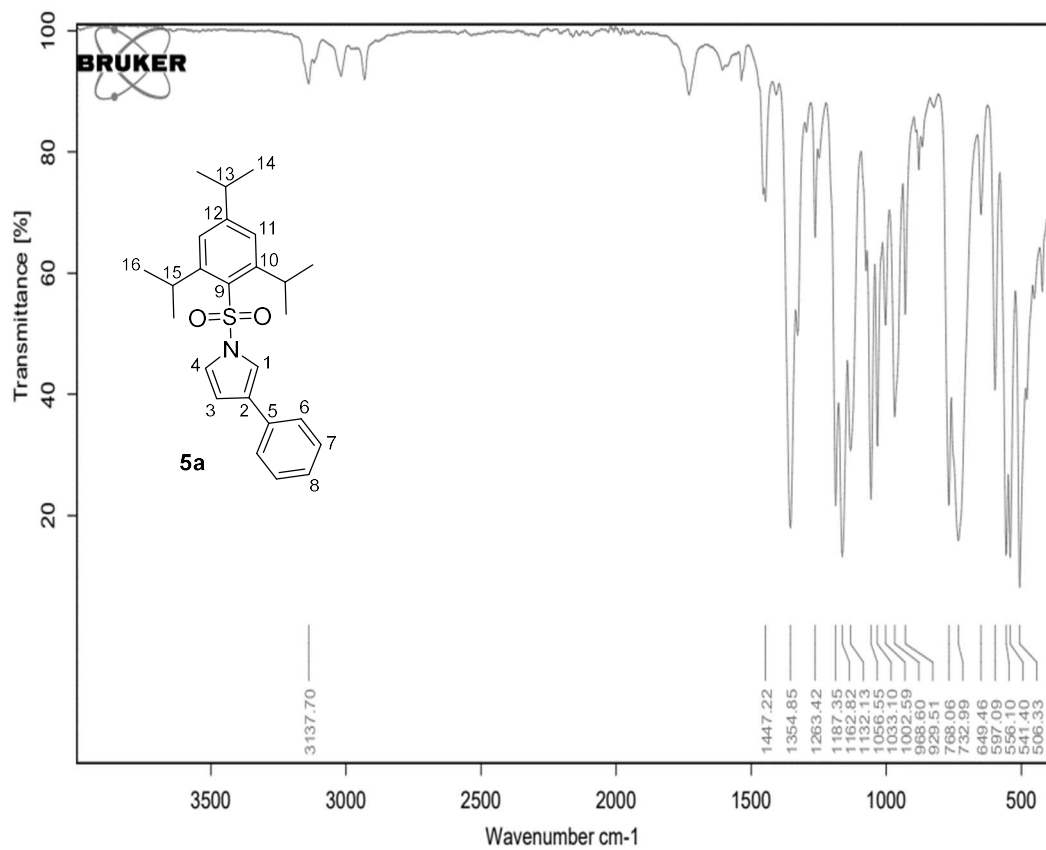

Figure S21: IR spectrum of 3-phenyl-1-((2,4,6-triisopropylphenyl)sulfonyl)-1H-pyrrole **5a**



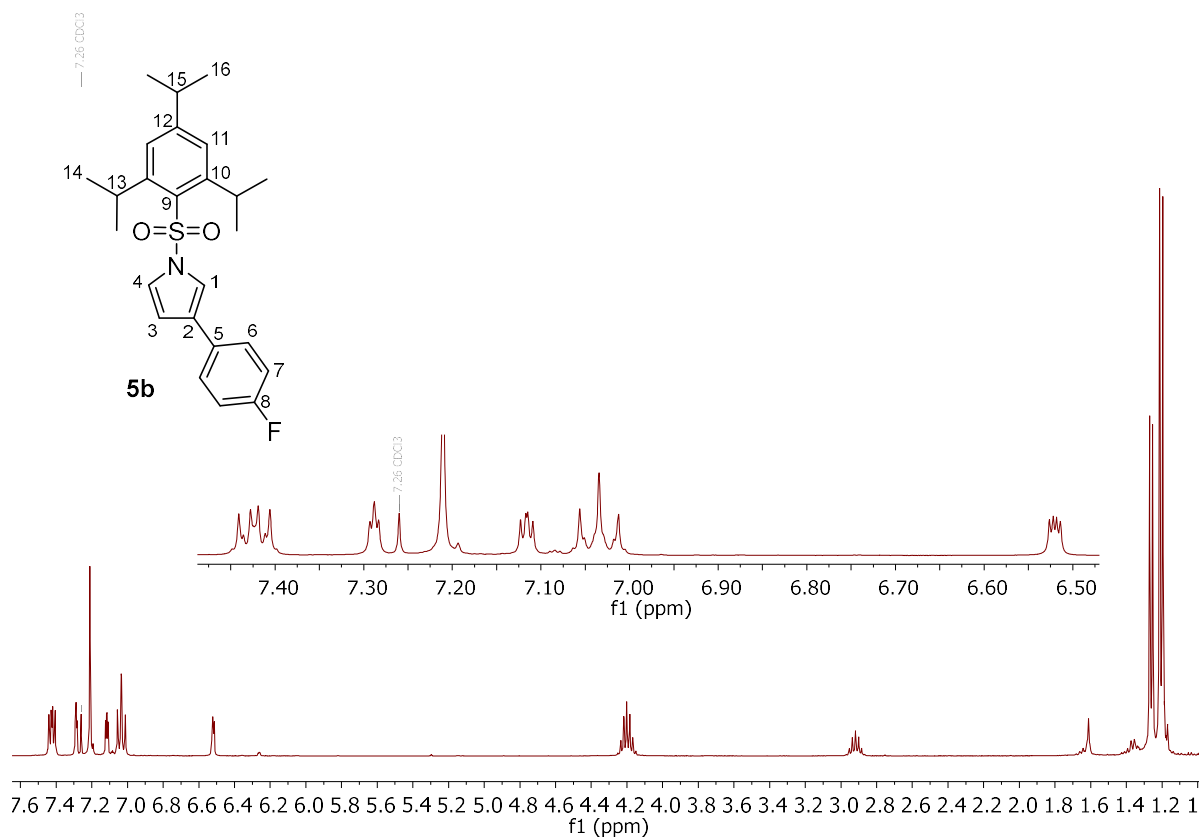

Figure S22: <sup>1</sup>H NMR spectrum of 3-(4-fluorophenyl)-1-((2,4,6-trisopropylphenyl)sulfonyl)-1H-pyrrole **5b** in CDCl<sub>3</sub>

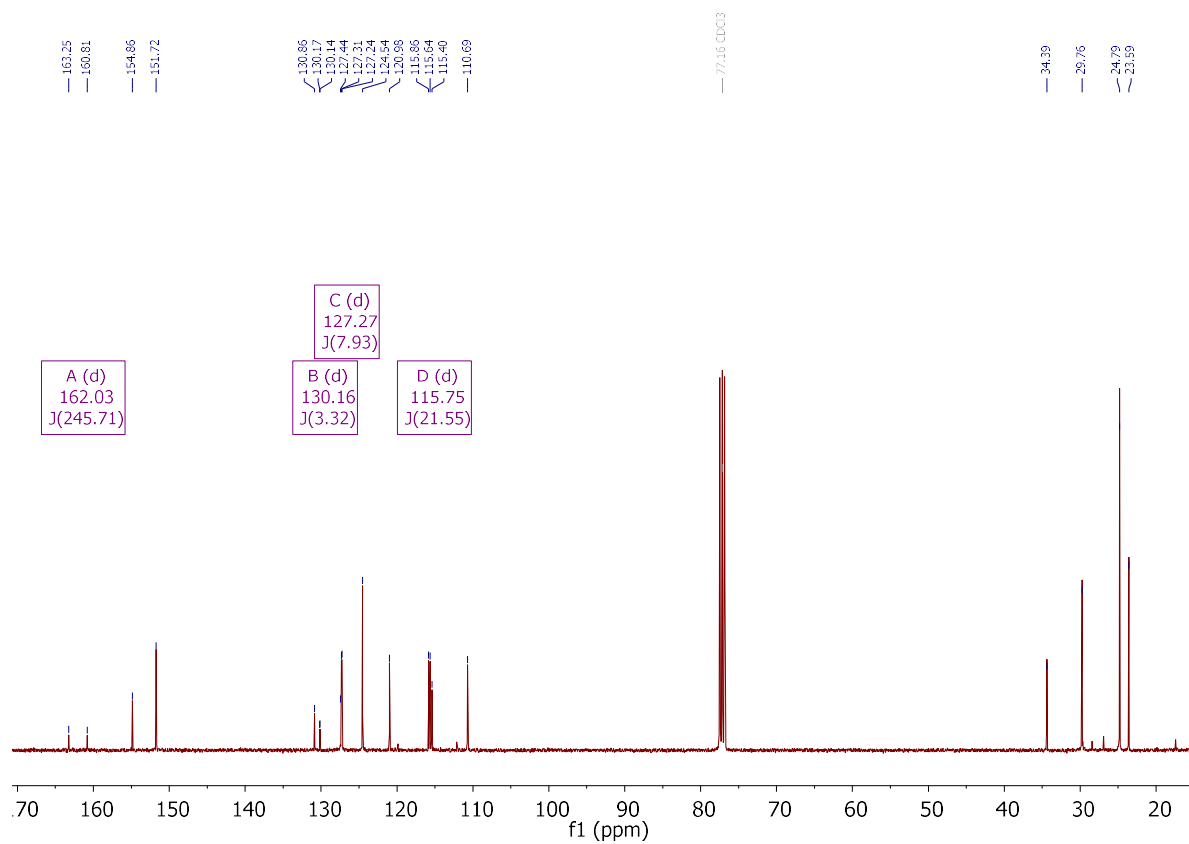

Figure S23: <sup>13</sup>C NMR spectrum of 3-(4-fluorophenyl)-1-((2,4,6-trisopropylphenyl)sulfonyl)-1H-pyrrole **5b** in CDCl<sub>3</sub>

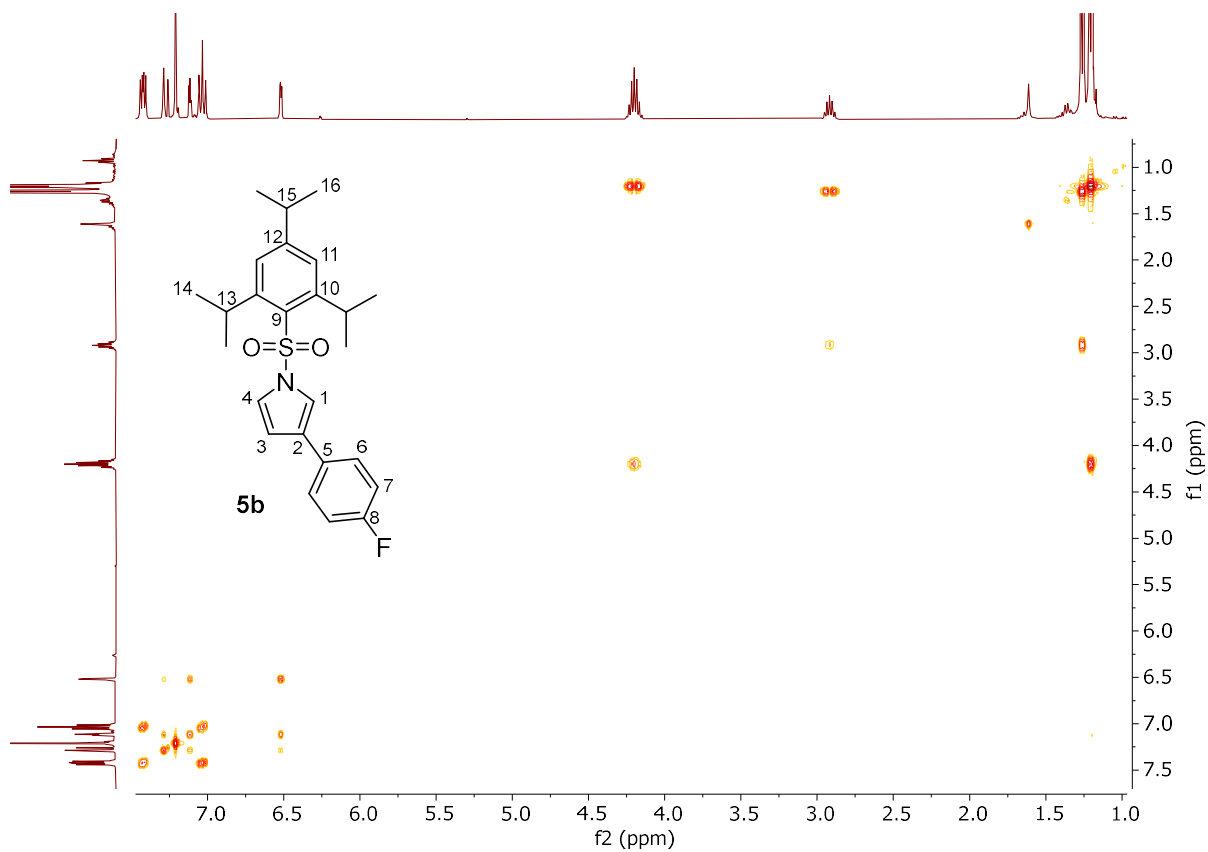

Figure S24: COSY NMR spectrum of 3-(4-fluorophenyl)-1-((2,4,6-triisopropylphenyl)sulfonyl)-1H-pyrrole **5b** in  $CDCl_3$

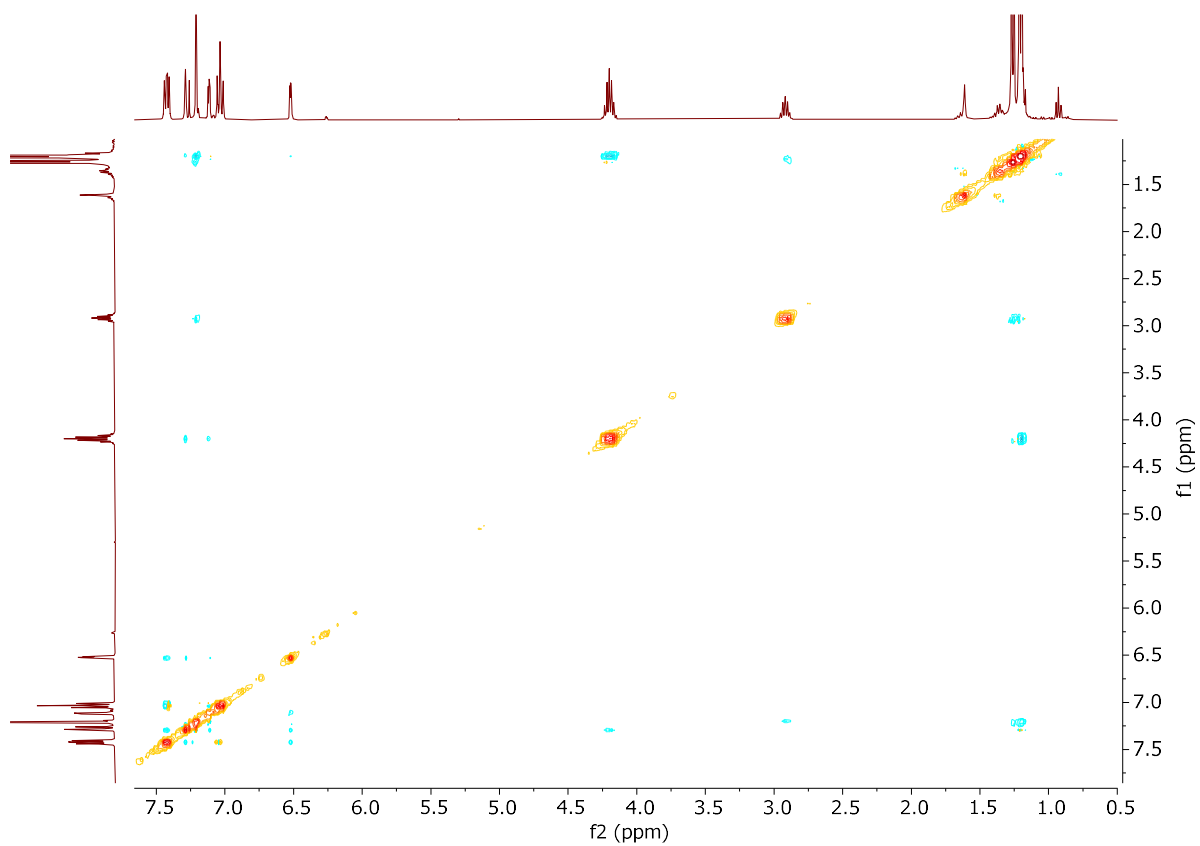

Figure S25: NOESY NMR spectrum of 3-(4-fluorophenyl)-1-((2,4,6-triisopropylphenyl)sulfonyl)-1H-pyrrole **5b** in  $CDCl_3$

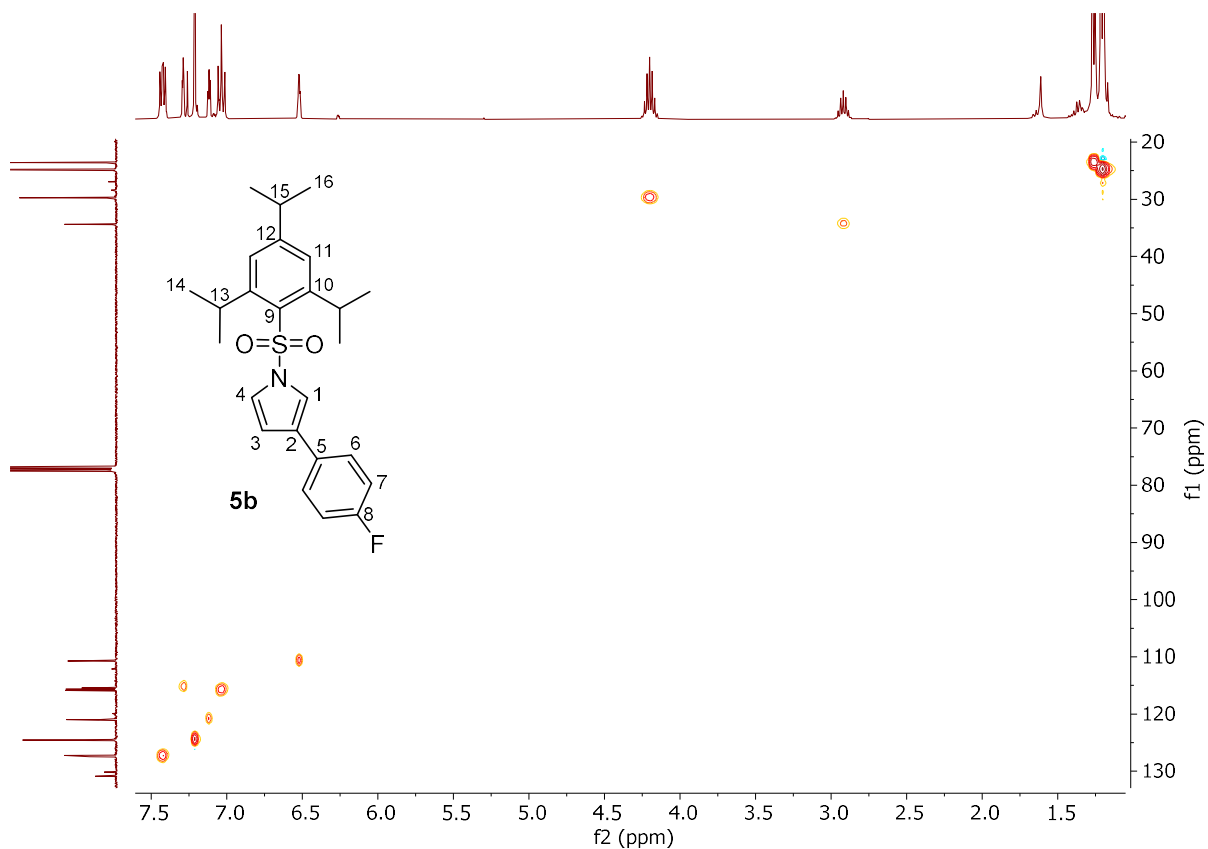

Figure S26: HSQC NMR spectrum of 3-(4-fluorophenyl)-1-((2,4,6-triisopropylphenyl)sulfonyl)-1H-pyrrole **5b** in  $CDCl_3$

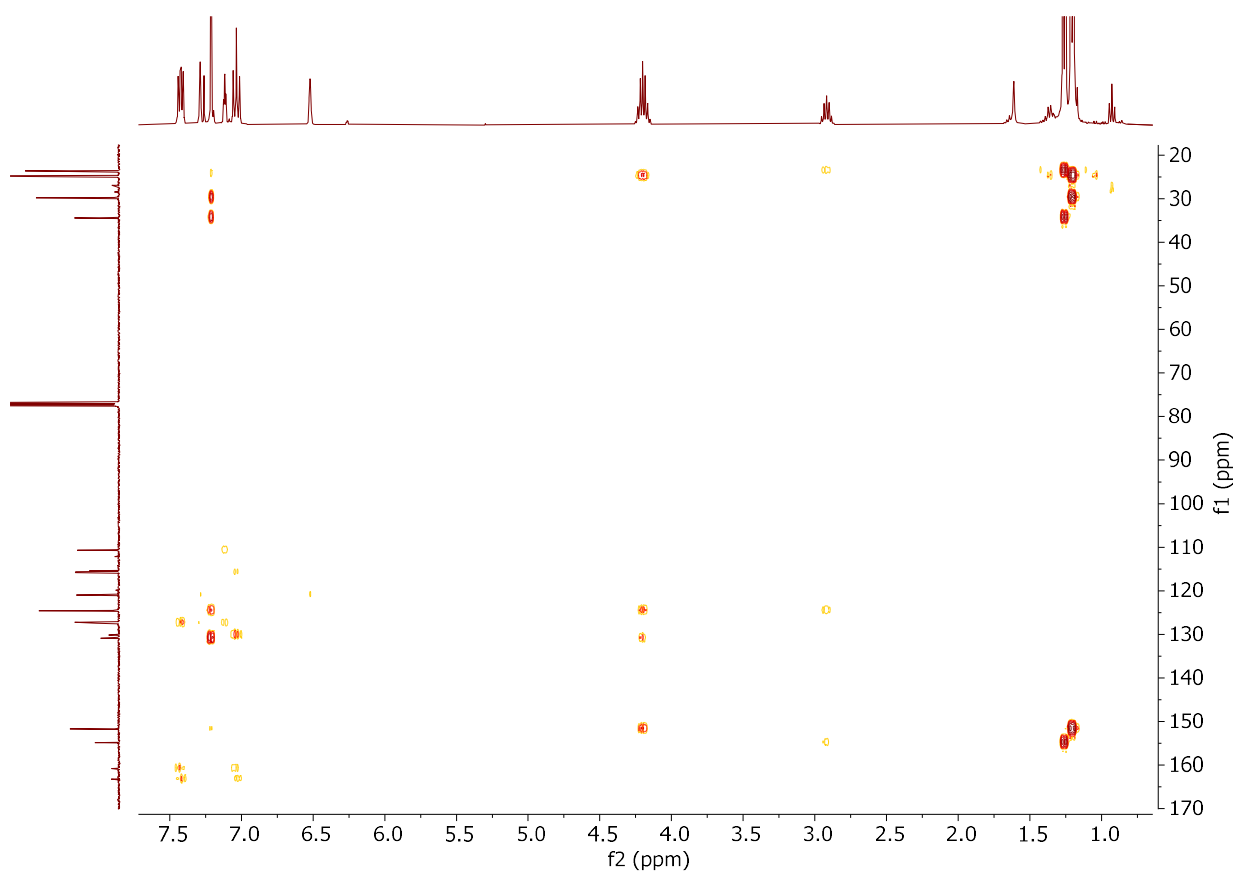

Figure S27: HMBC NMR spectrum of 3-(4-fluorophenyl)-1-((2,4,6-triisopropylphenyl)sulfonyl)-1H-pyrrole **5b** in  $CDCl_3$

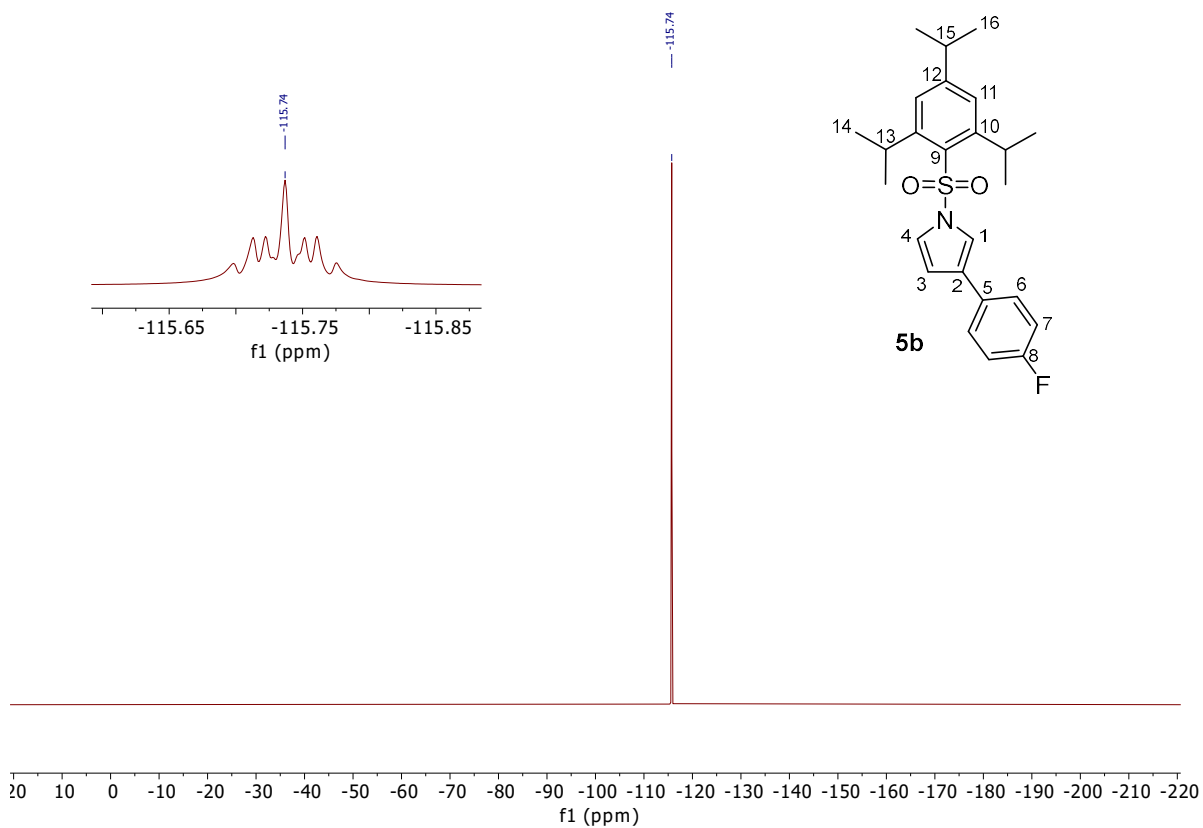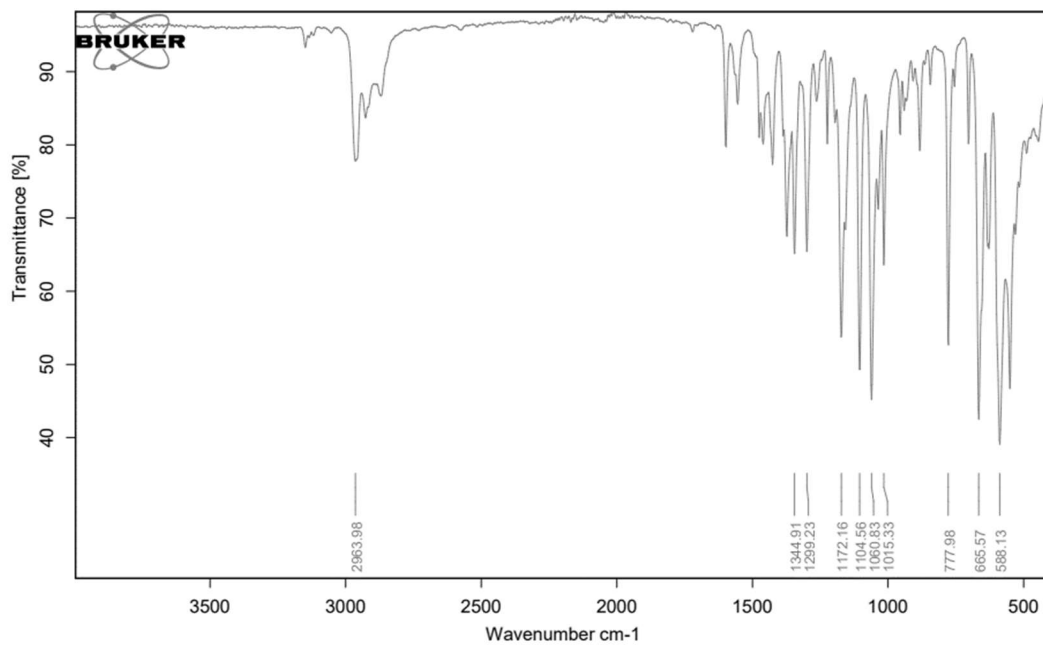

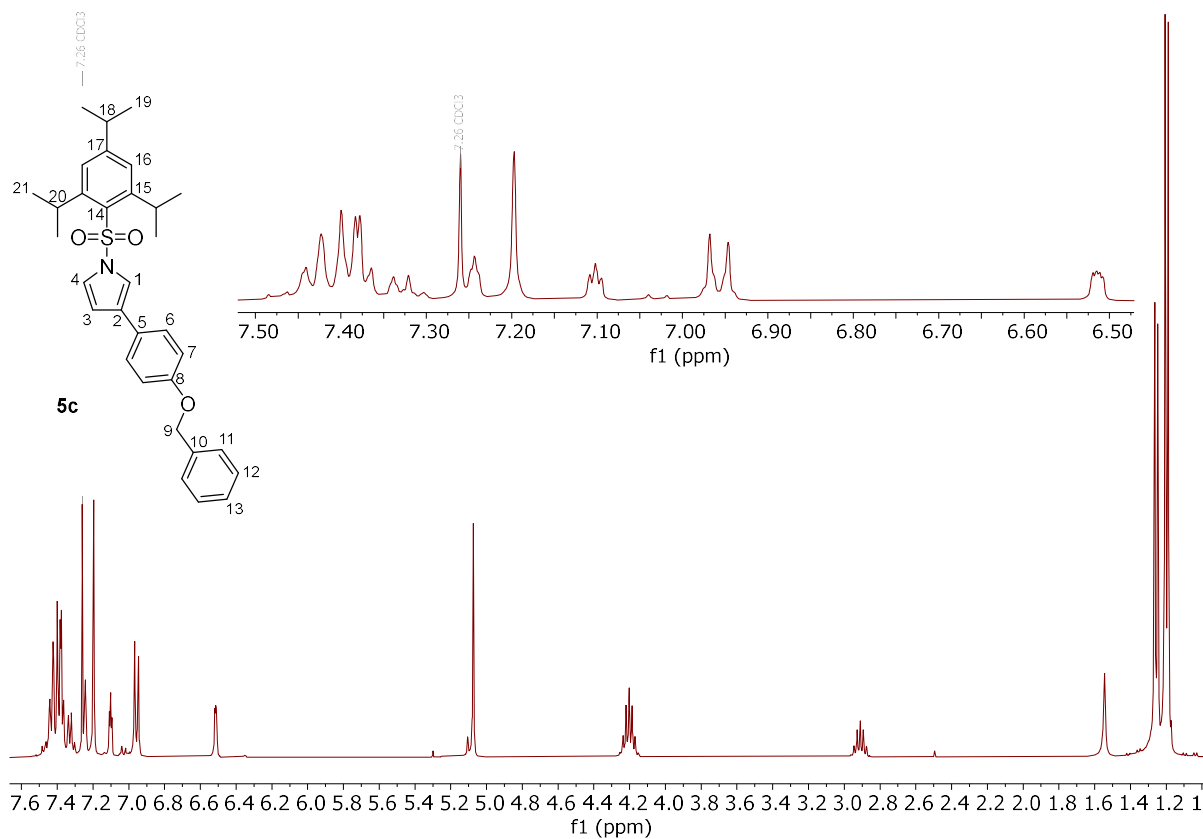

Figure S30: <sup>1</sup>H NMR spectrum of 3-(4-(benzyloxy)phenyl)-1-((2,4,6-triisopropylphenyl)sulfonyl)-1H-pyrrole **5c** in CDCl<sub>3</sub>

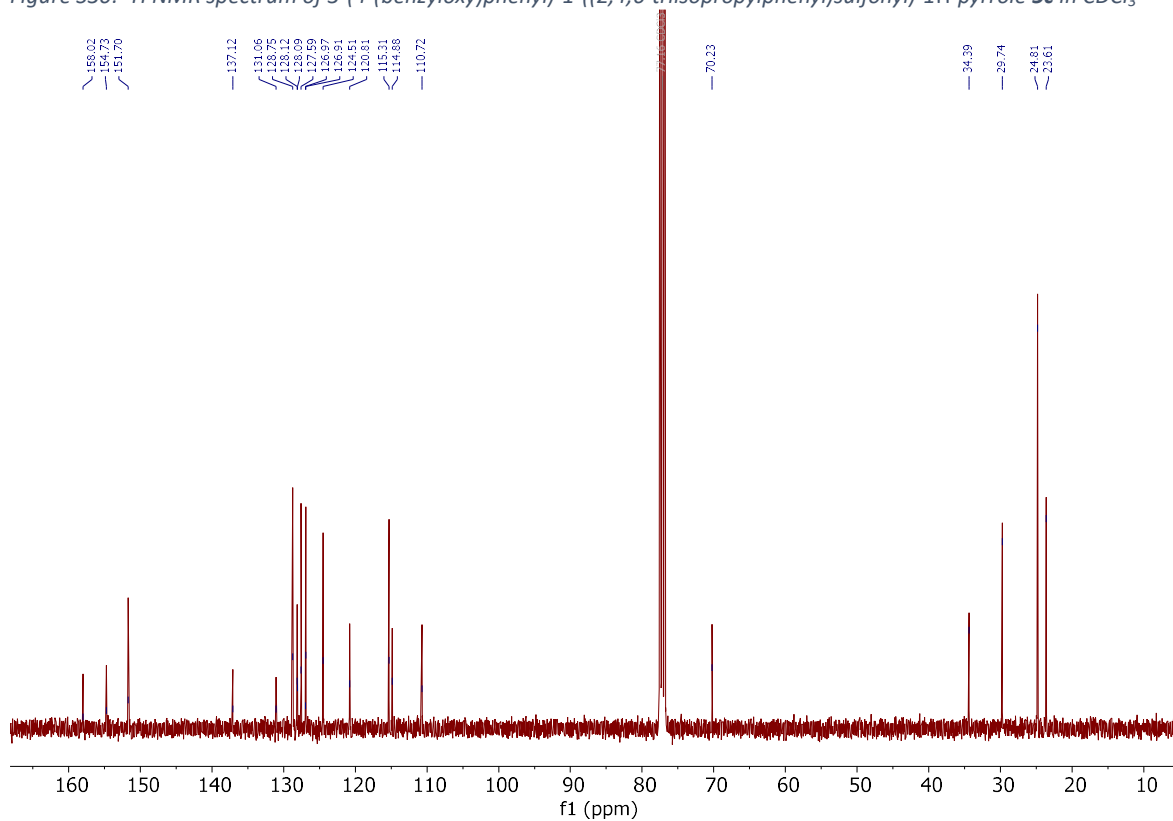

Figure S31: <sup>13</sup>C NMR spectrum of 3-(4-(benzyloxy)phenyl)-1-((2,4,6-triisopropylphenyl)sulfonyl)-1H-pyrrole **5c** in CDCl<sub>3</sub>

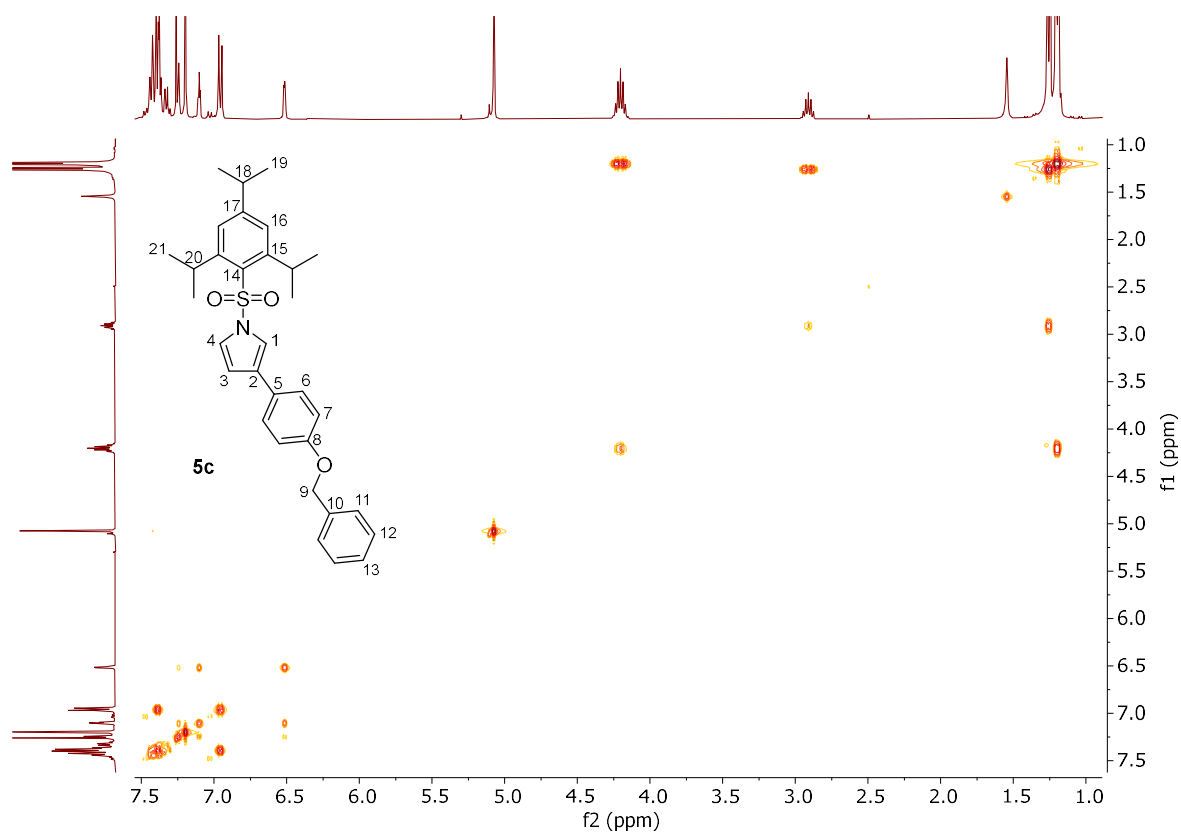

Figure S32: COSY NMR spectrum of 3-(4-(benzyloxy)phenyl)-1-((2,4,6-triisopropylphenyl)sulfonyl)-1H-pyrrole **5c** in  $CDCl_3$

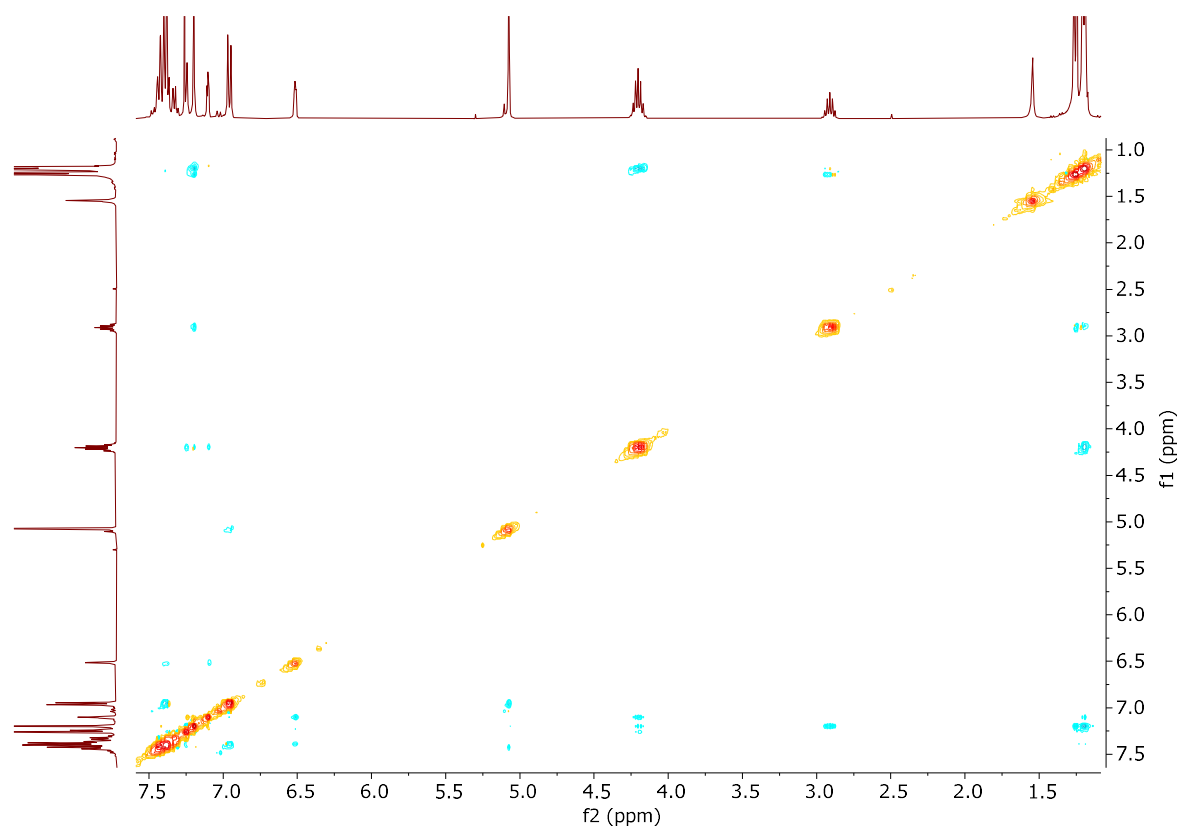

Figure S33: NOESY NMR spectrum of 3-(4-(benzyloxy)phenyl)-1-((2,4,6-triisopropylphenyl)sulfonyl)-1H-pyrrole **5c** in  $CDCl_3$

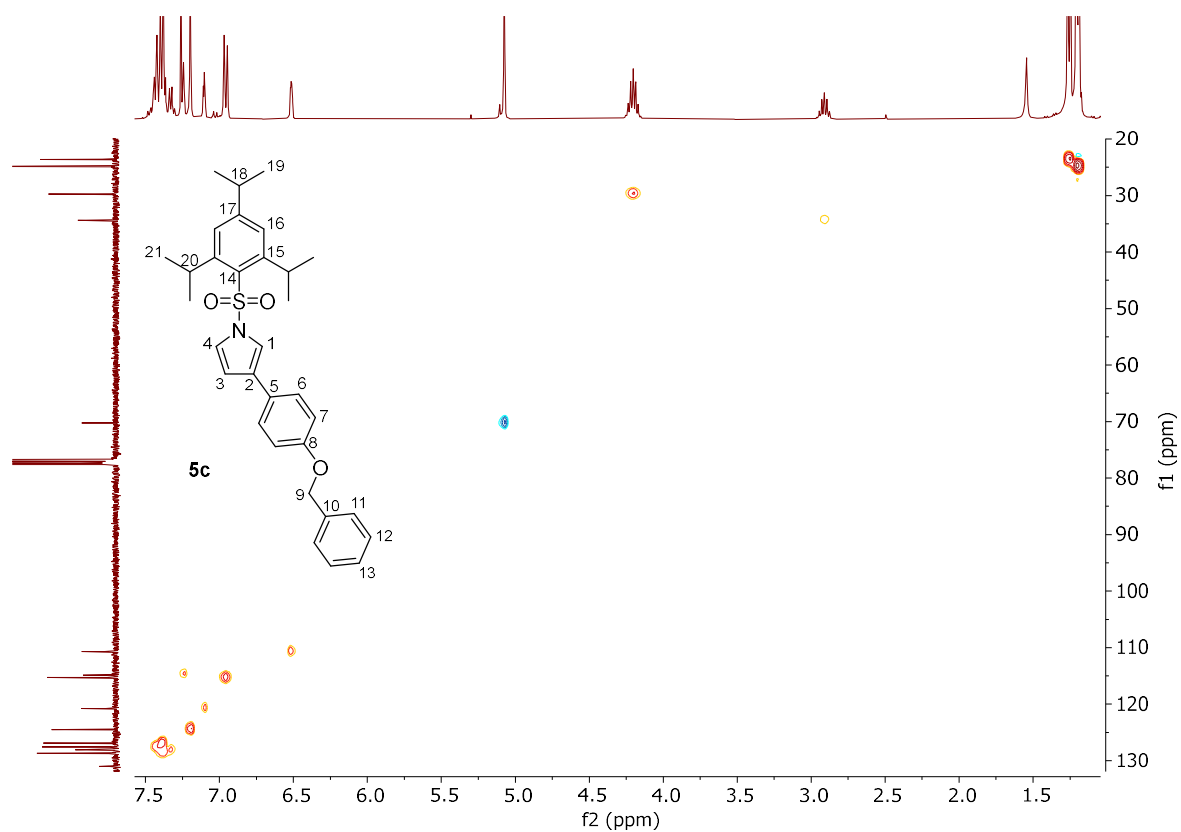

Figure S34: HSQC NMR spectrum of 3-(4-(benzyloxy)phenyl)-1-((2,4,6-triisopropylphenyl)sulfonyl)-1H-pyrrole **5c** in  $CDCl_3$

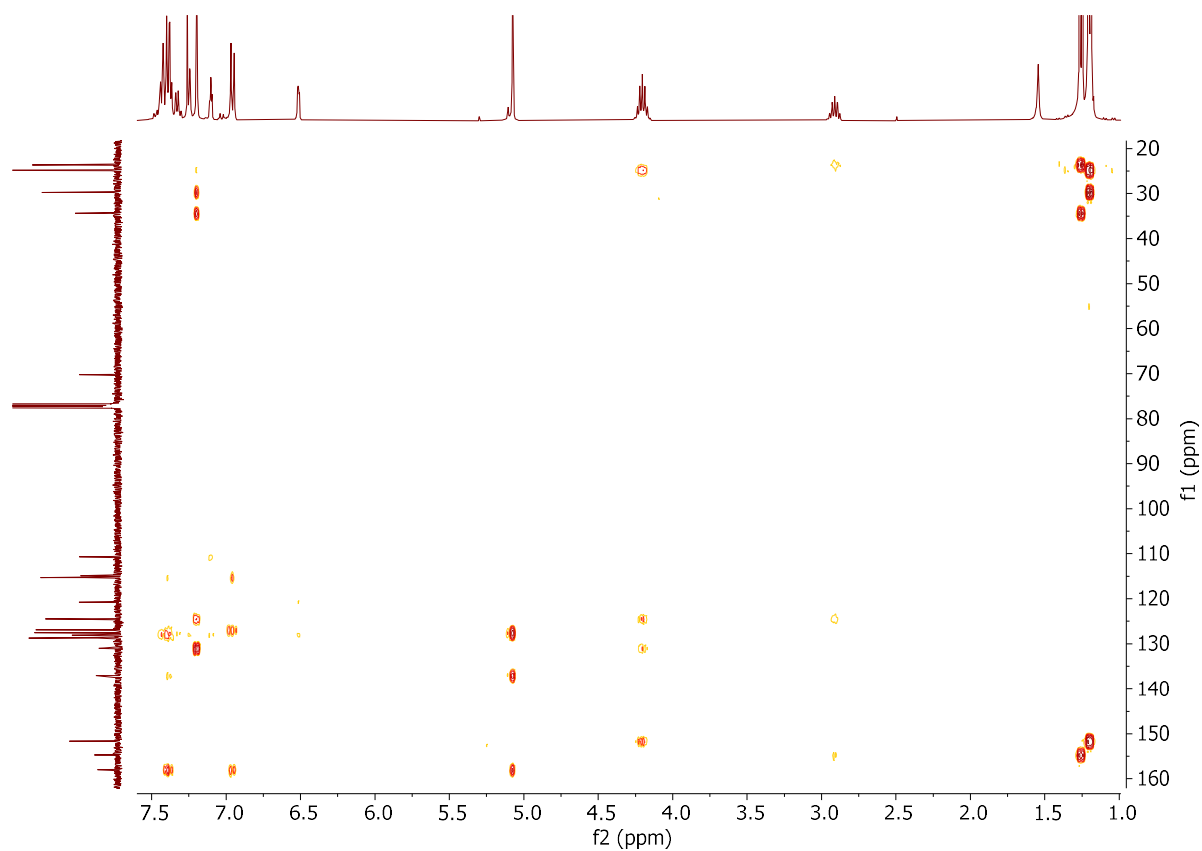

Figure S35: HMBC NMR spectrum of 3-(4-(benzyloxy)phenyl)-1-((2,4,6-triisopropylphenyl)sulfonyl)-1H-pyrrole **5c** in  $CDCl_3$

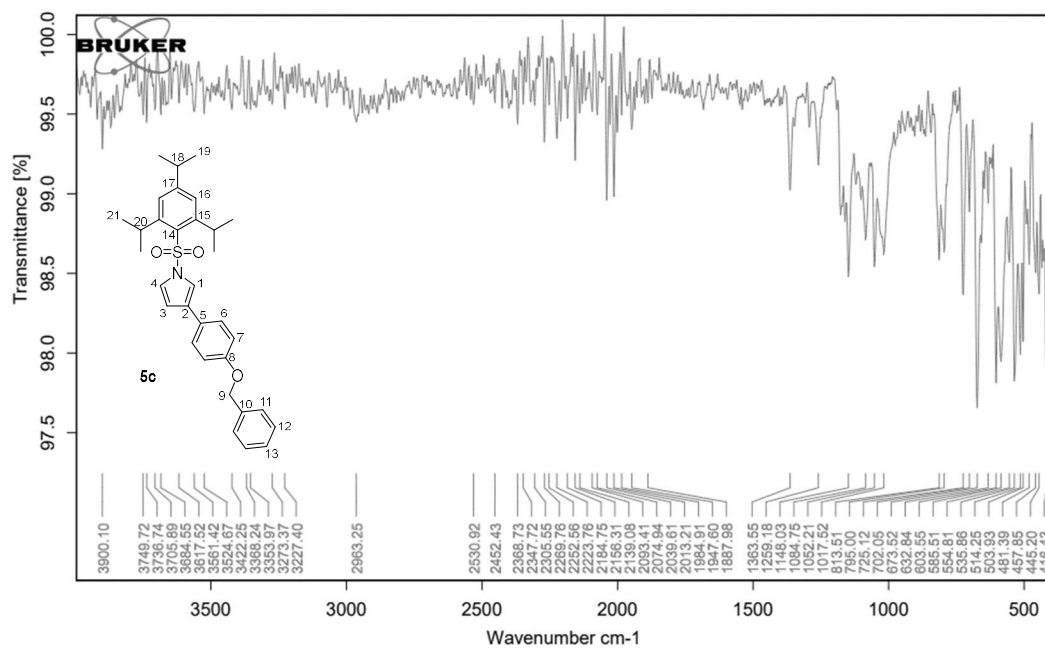

Figure S36: IR spectrum of 3-(4-(benzyloxy)phenyl)-1-((2,4,6-triisopropylphenyl)sulfonyl)-1H-pyrrole 5c



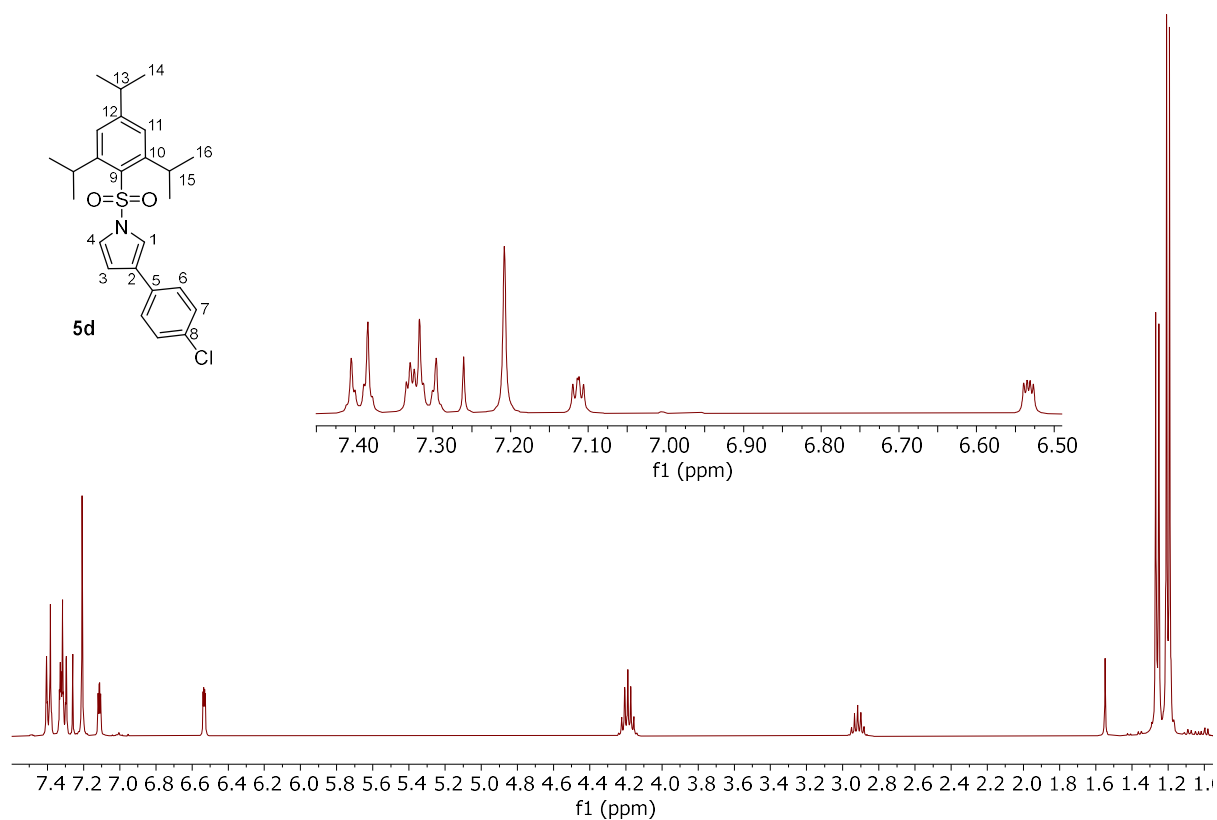

Figure S37:  $^1\text{H}$  NMR spectrum of 3-(4-chlorophenyl)-1-((2,4,6-trisopropylphenyl)sulfonyl)-1H-pyrrole **5d** in  $\text{CDCl}_3$

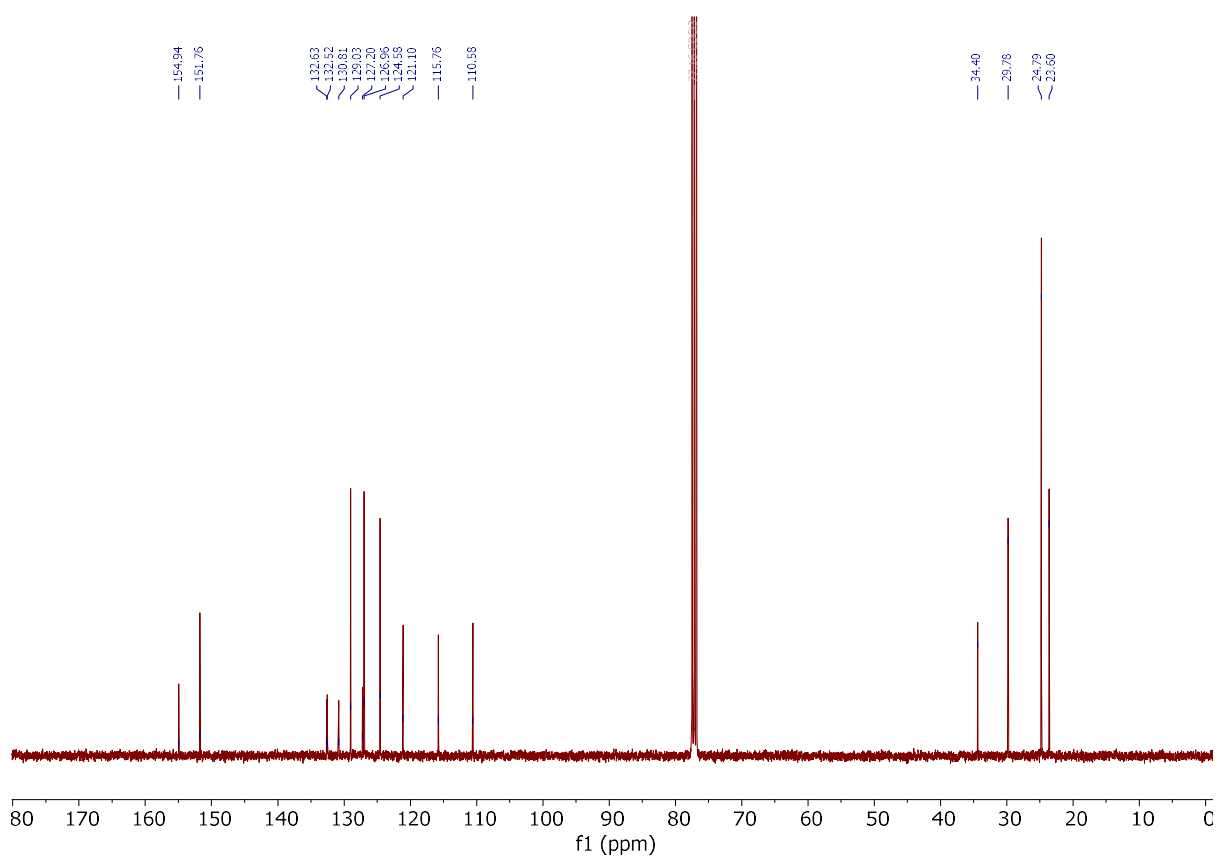

Figure S38:  $^{13}\text{C}$  NMR spectrum of 3-(4-chlorophenyl)-1-((2,4,6-trisopropylphenyl)sulfonyl)-1H-pyrrole **5d** in  $\text{CDCl}_3$ .

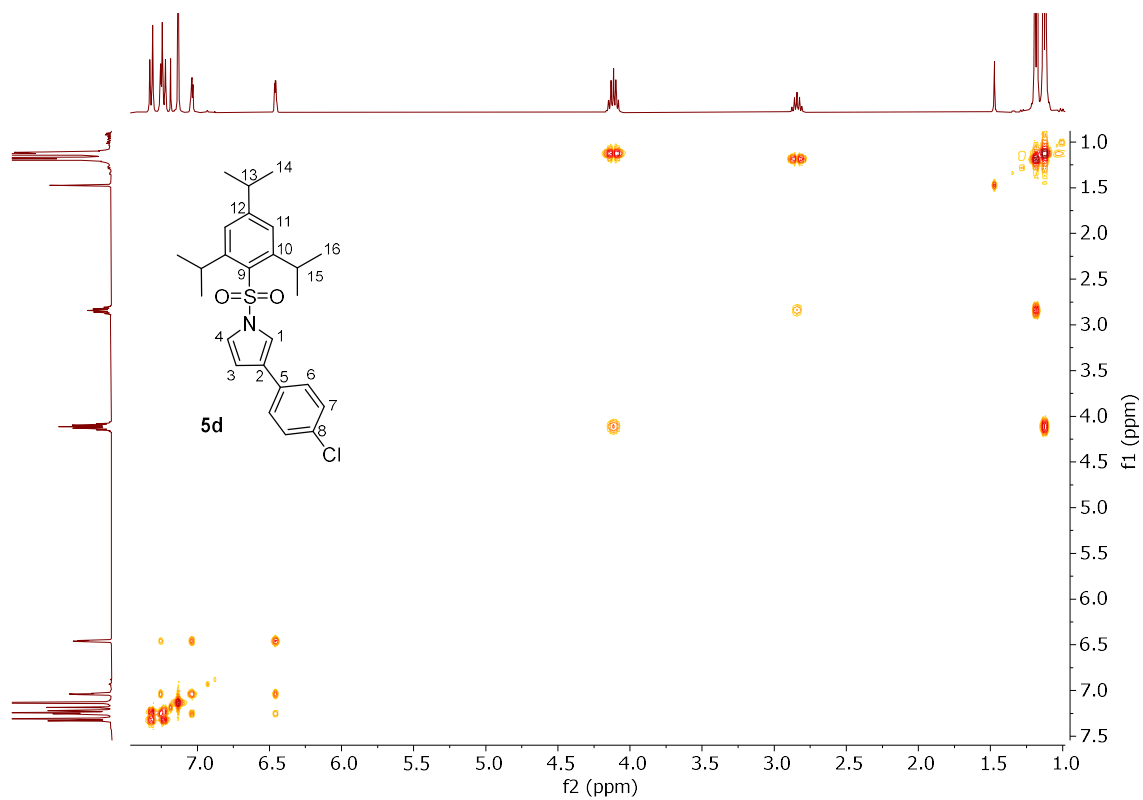

Figure S39: COSY NMR spectrum of 3-(4-chlorophenyl)-1-((2,4,6-triisopropylphenyl)sulfonyl)-1H-pyrrole **5d** in  $CDCl_3$ .

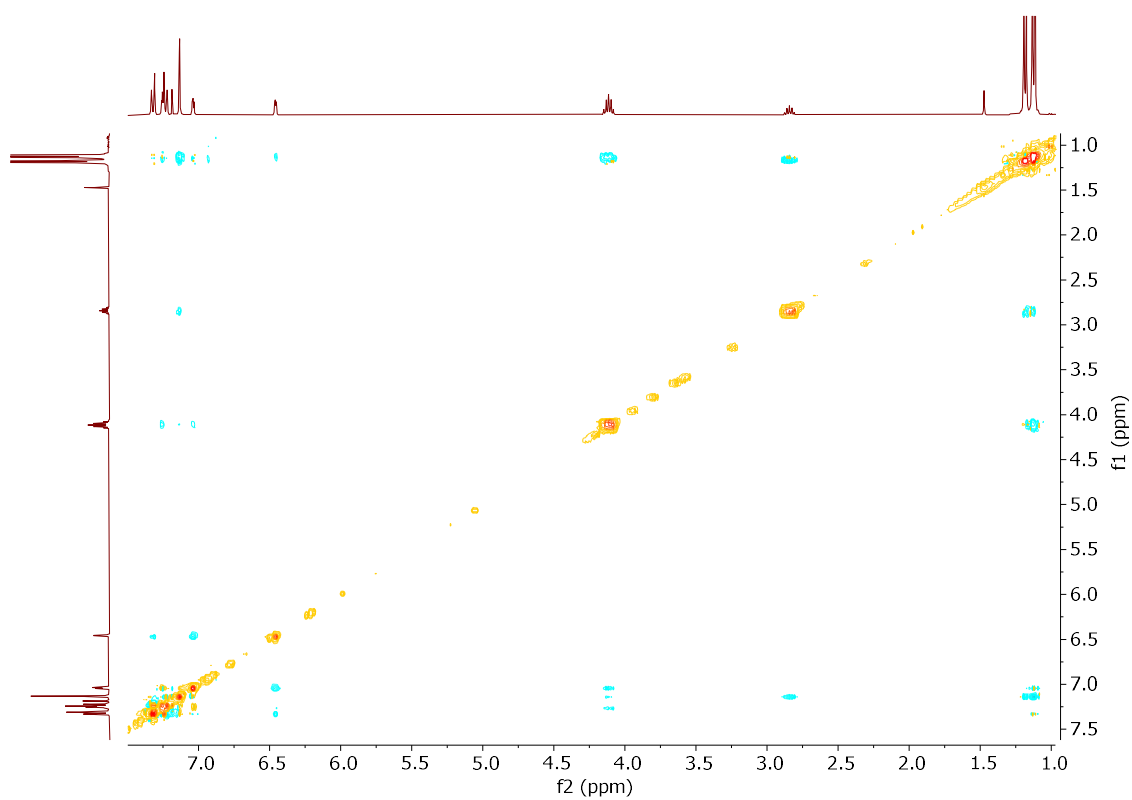

Figure S40: NOESY NMR spectrum of 3-(4-chlorophenyl)-1-((2,4,6-triisopropylphenyl)sulfonyl)-1H-pyrrole **5d** in  $CDCl_3$ .

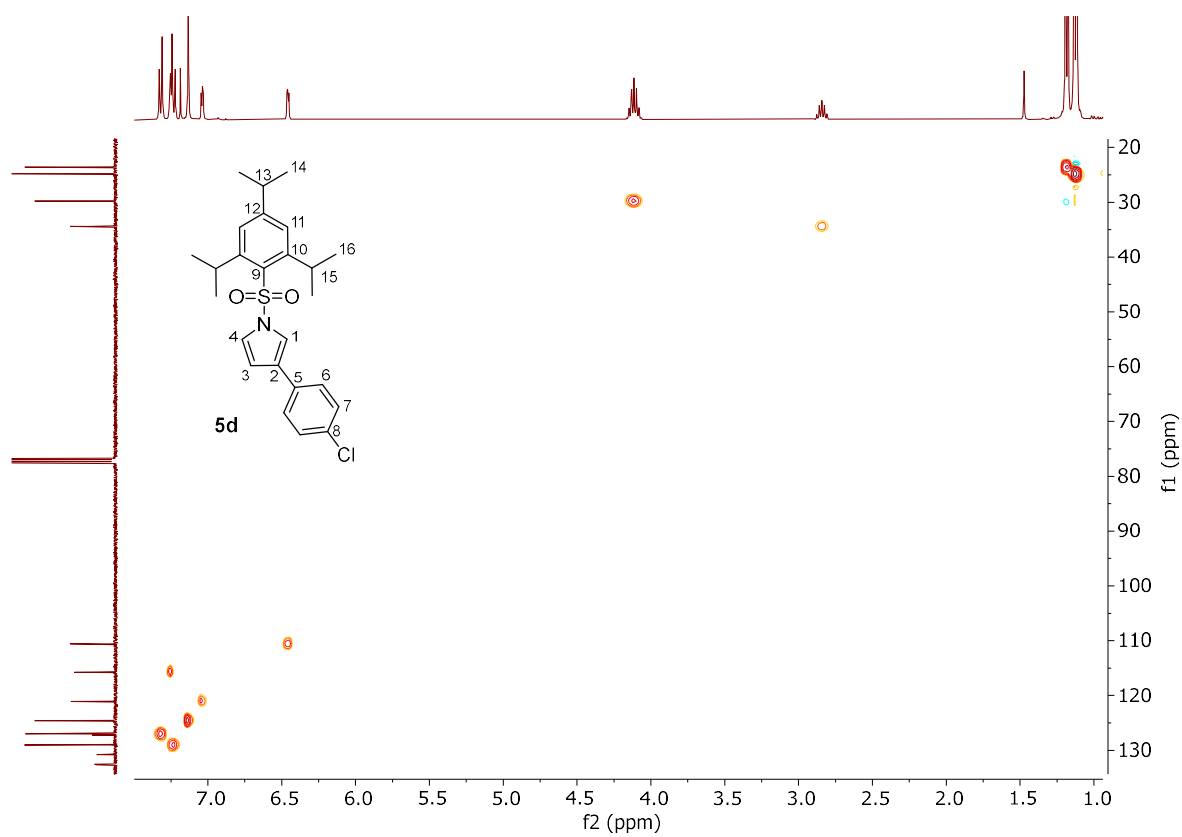

Figure S41: HSQC NMR spectrum of 3-(4-chlorophenyl)-1-((2,4,6-triisopropylphenyl)sulfonyl)-1H-pyrrole **5d** in CDCl<sub>3</sub>.

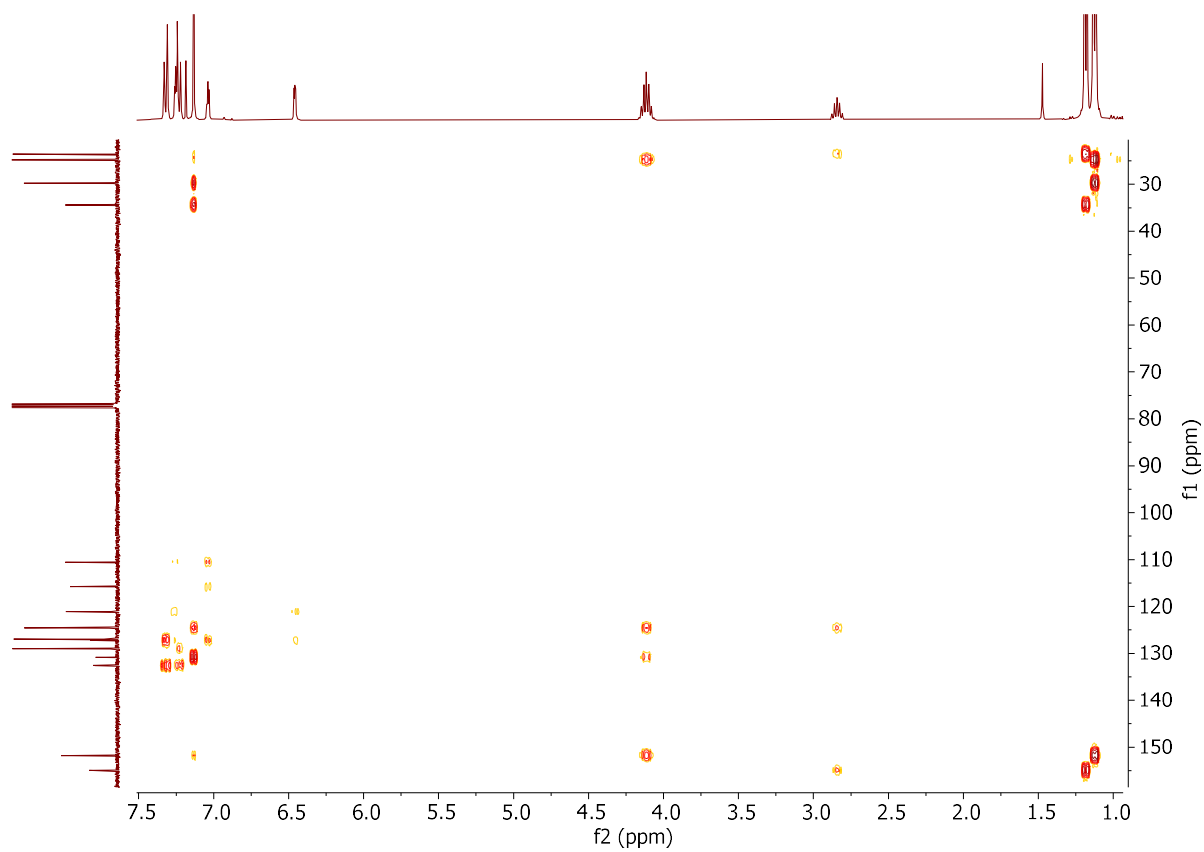

Figure S42: HMBC NMR spectrum of 3-(4-chlorophenyl)-1-((2,4,6-triisopropylphenyl)sulfonyl)-1H-pyrrole **5d** in CDCl<sub>3</sub>.

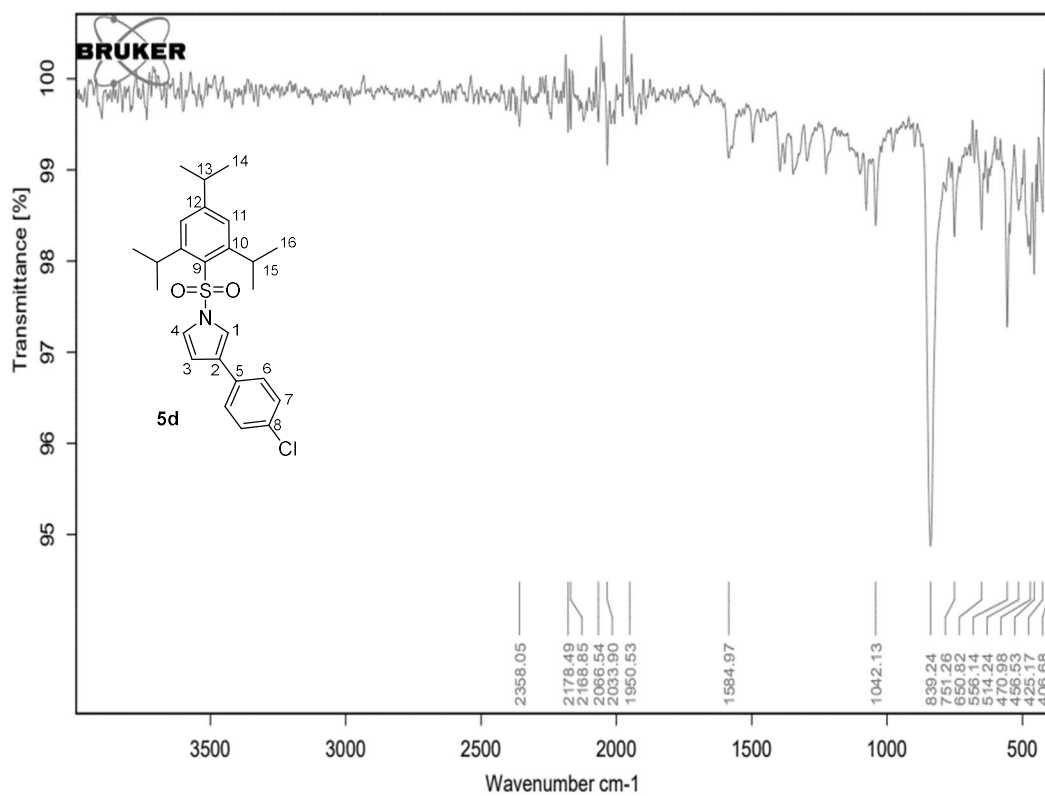

Figure S43: IR spectrum of 3-(4-chlorophenyl)-1-((2,4,6-triisopropylphenyl)sulfonyl)-1H-pyrrole **5d**

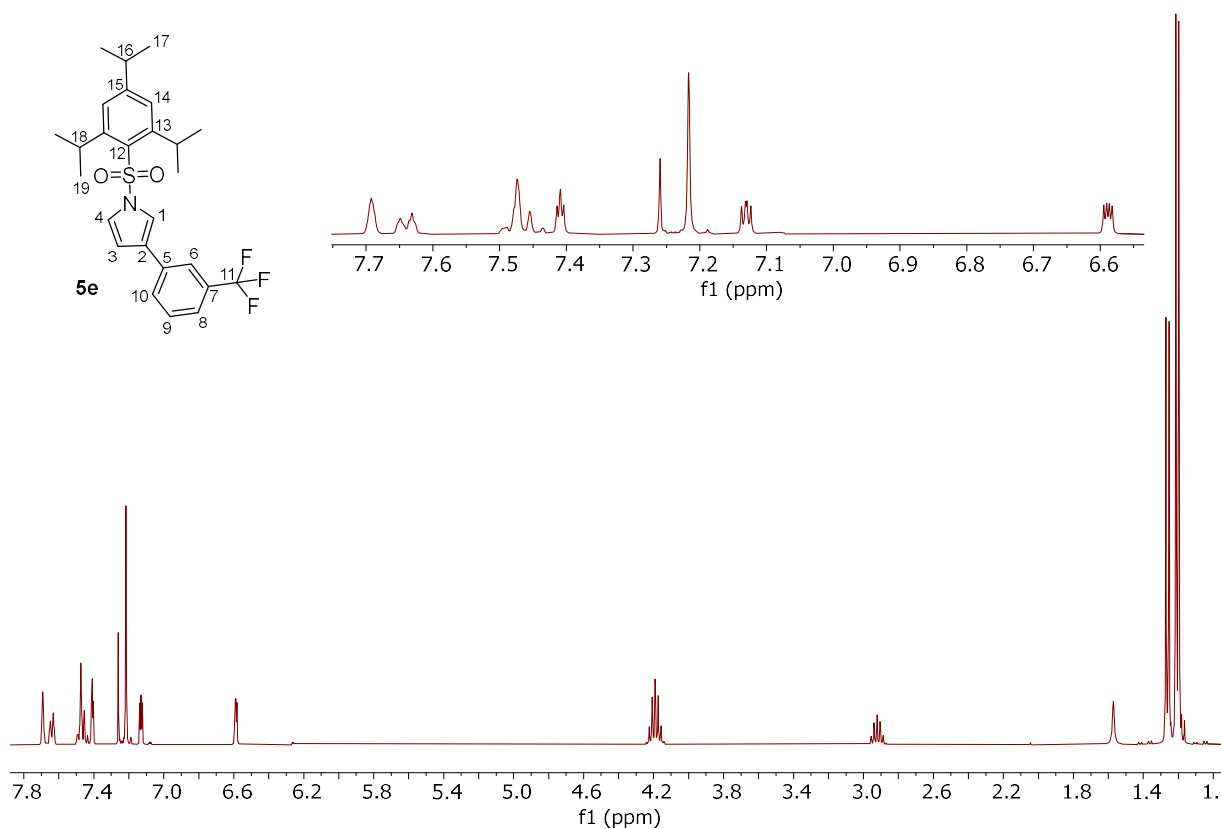

Figure S44:  $^1\text{H}$  NMR spectrum of 3-(3-(trifluoromethyl)phenyl)-1-((2,4,6-triisopropylphenyl)sulfonyl)-1H-pyrrole **5e** in  $\text{CDCl}_3$

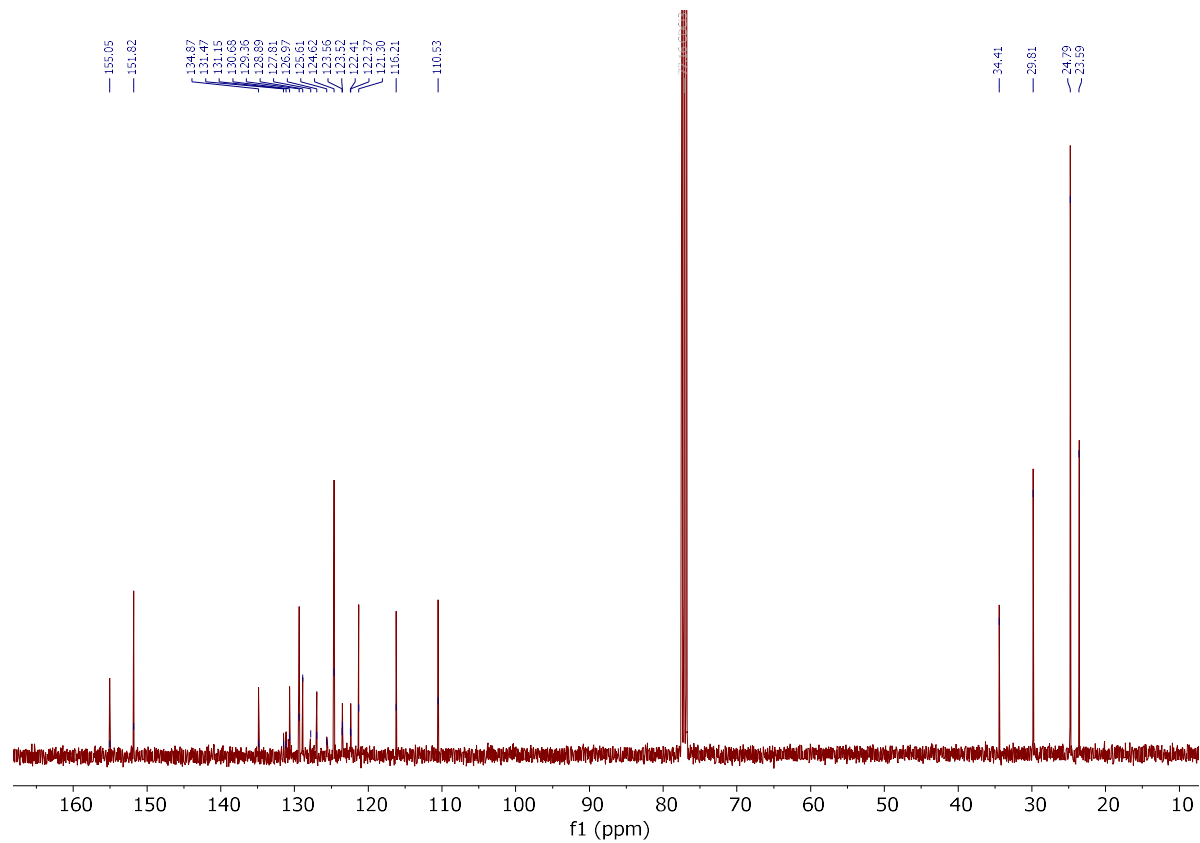

Figure S45:  $^{13}\text{C}$  NMR spectrum of 3-(3-(trifluoromethyl)phenyl)-1-((2,4,6-triisopropylphenyl)sulfonyl)-1H-pyrrole **5e** in  $\text{CDCl}_3$

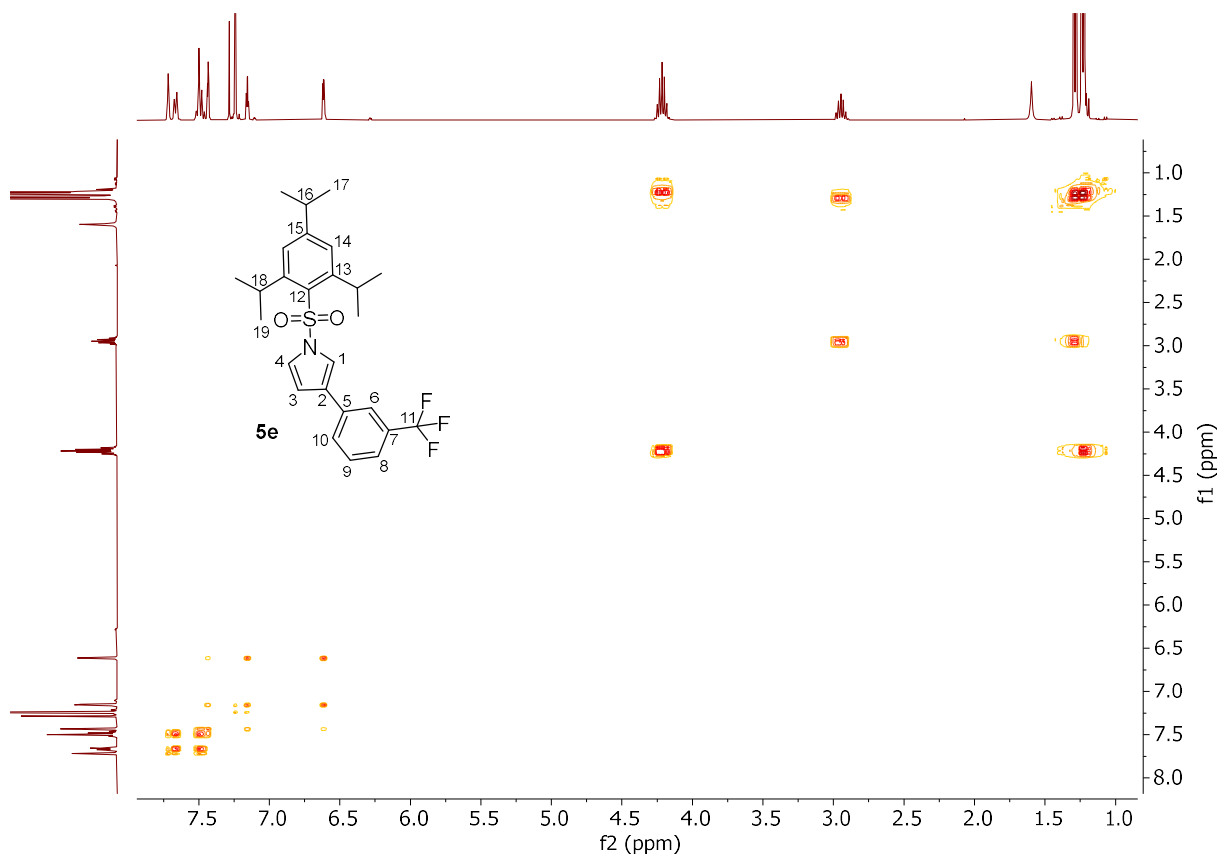

Figure S46: COSY spectrum of 3-(3-(trifluoromethyl)phenyl)-1-((2,4,6-triisopropylphenyl)sulfonyl)-1H-pyrrole **5e** in CDCl<sub>3</sub>

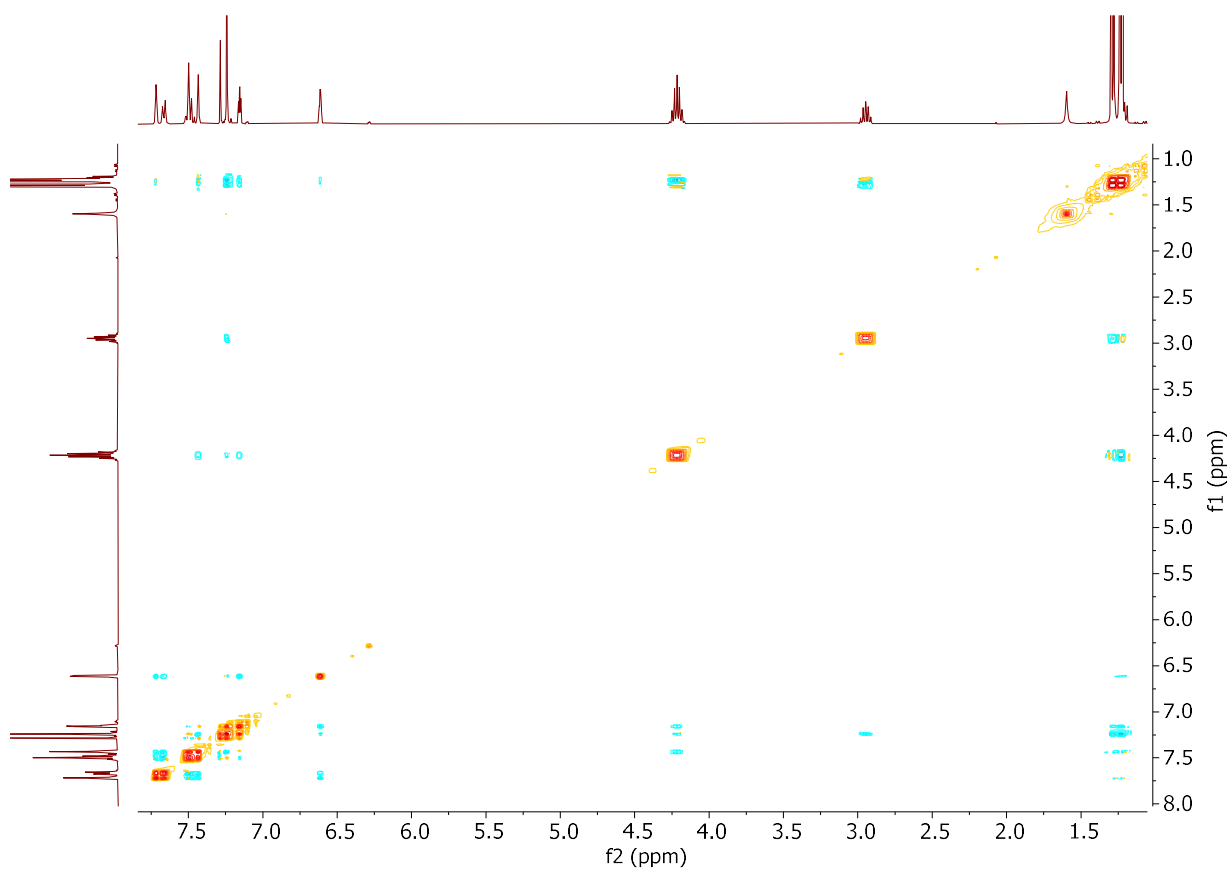

Figure S47: NOESY spectrum of 3-(3-(trifluoromethyl)phenyl)-1-((2,4,6-triisopropylphenyl)sulfonyl)-1H-pyrrole **5e** in CDCl<sub>3</sub>

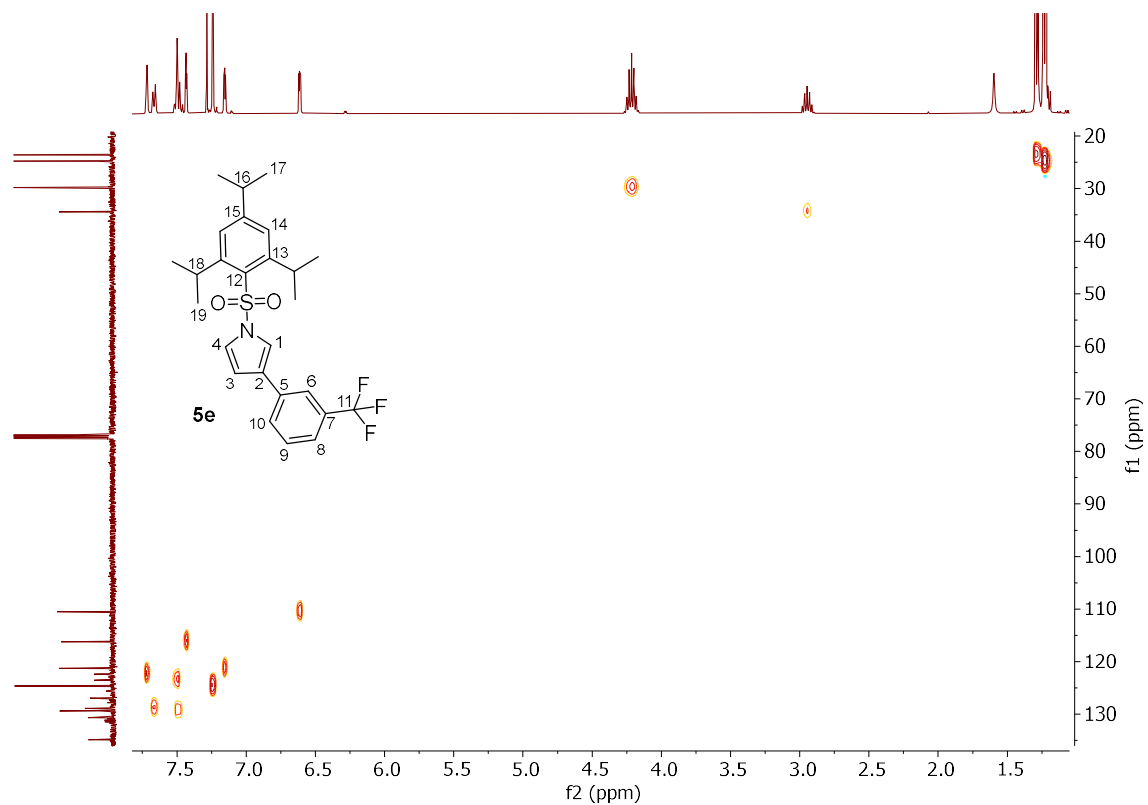

Figure S48: HSQC spectrum of 3-(3-(trifluoromethyl)phenyl)-1-((2,4,6-triisopropylphenyl)sulfonyl)-1H-pyrrole **5e** in  $CDCl_3$

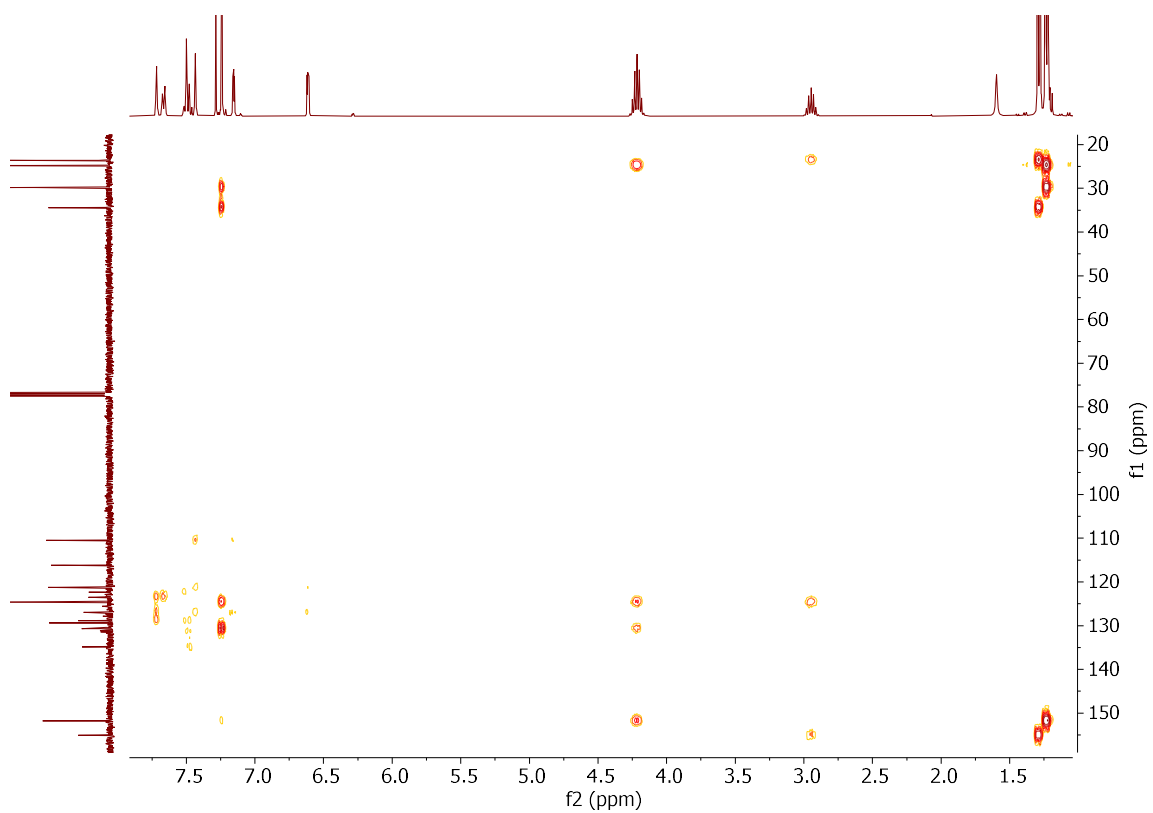

Figure S49: HMBC spectrum of 3-(3-(trifluoromethyl)phenyl)-1-((2,4,6-triisopropylphenyl)sulfonyl)-1H-pyrrole **5e** in  $CDCl_3$

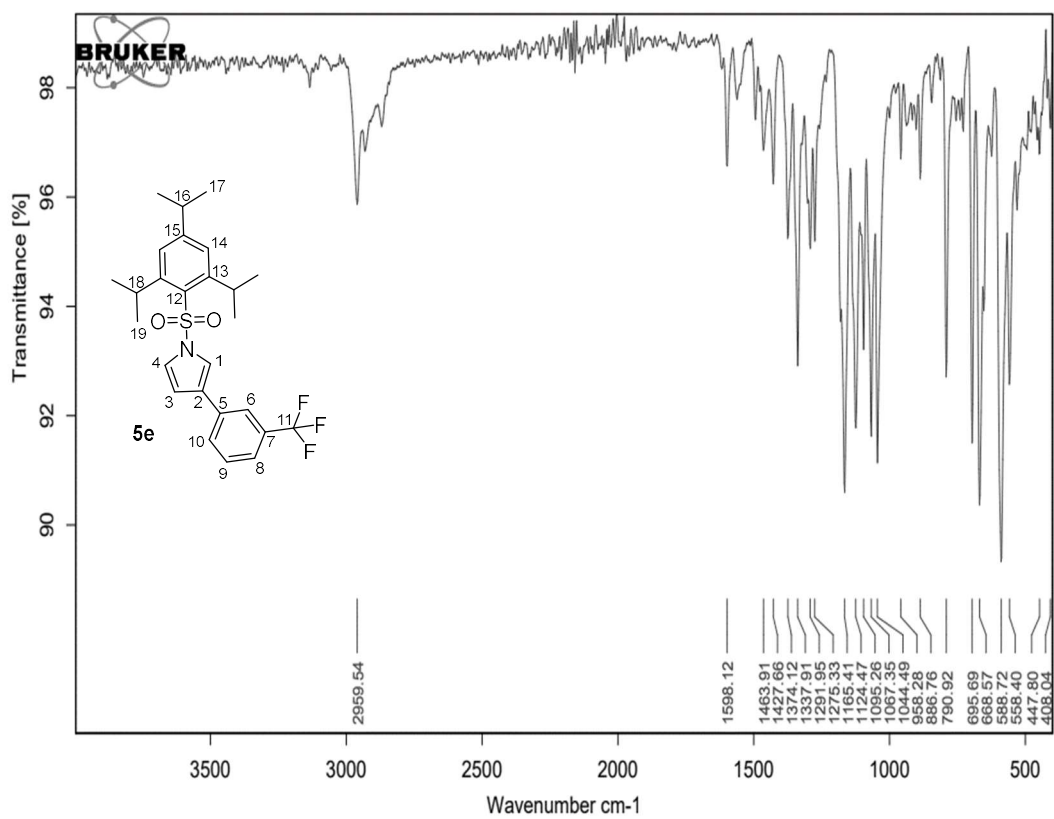

Figure S50: IR spectrum of 3-(3-(trifluoromethyl)phenyl)-1-((2,4,6-triisopropylphenyl)sulfonyl)-1H-pyrrole **5e**



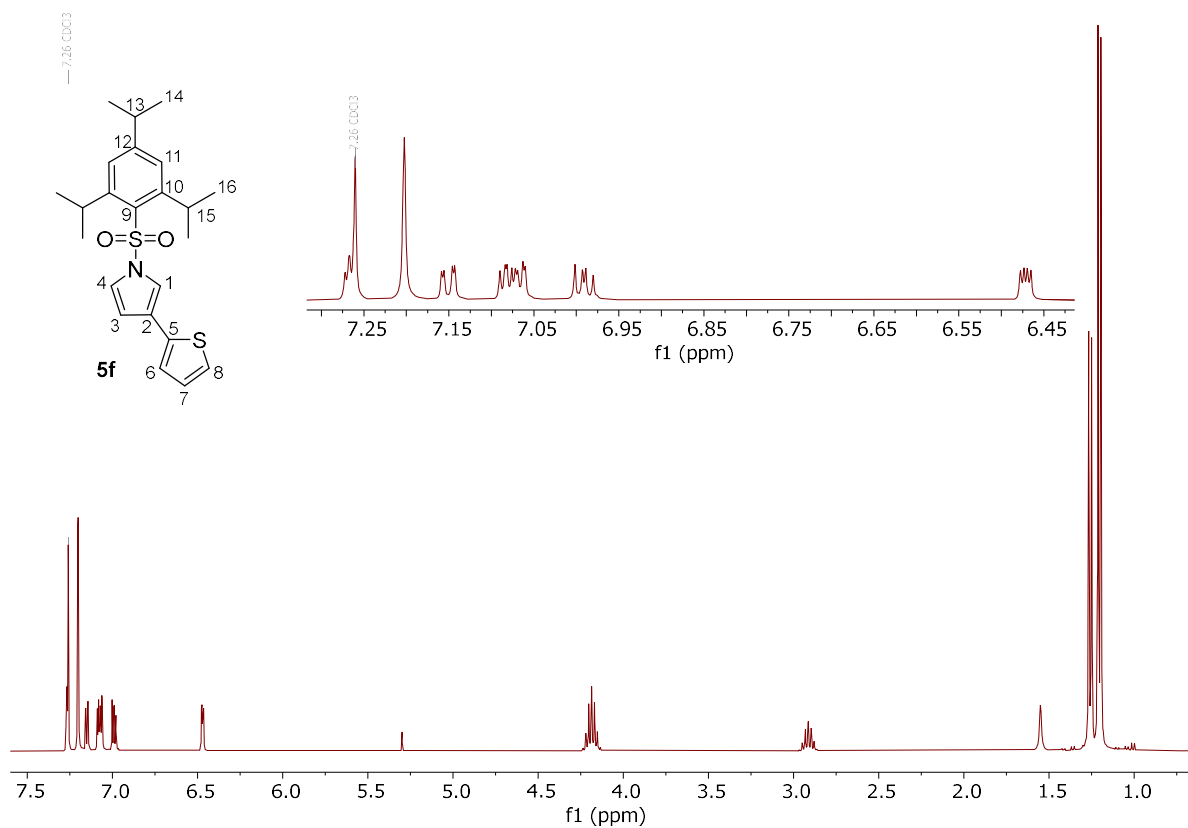

Figure S51: <sup>1</sup>H NMR of 3-(thiophen-2-yl)-1-((2,4,6-triisopropylphenyl)sulfonyl)-1H-pyrrole **5f** in CDCl<sub>3</sub>

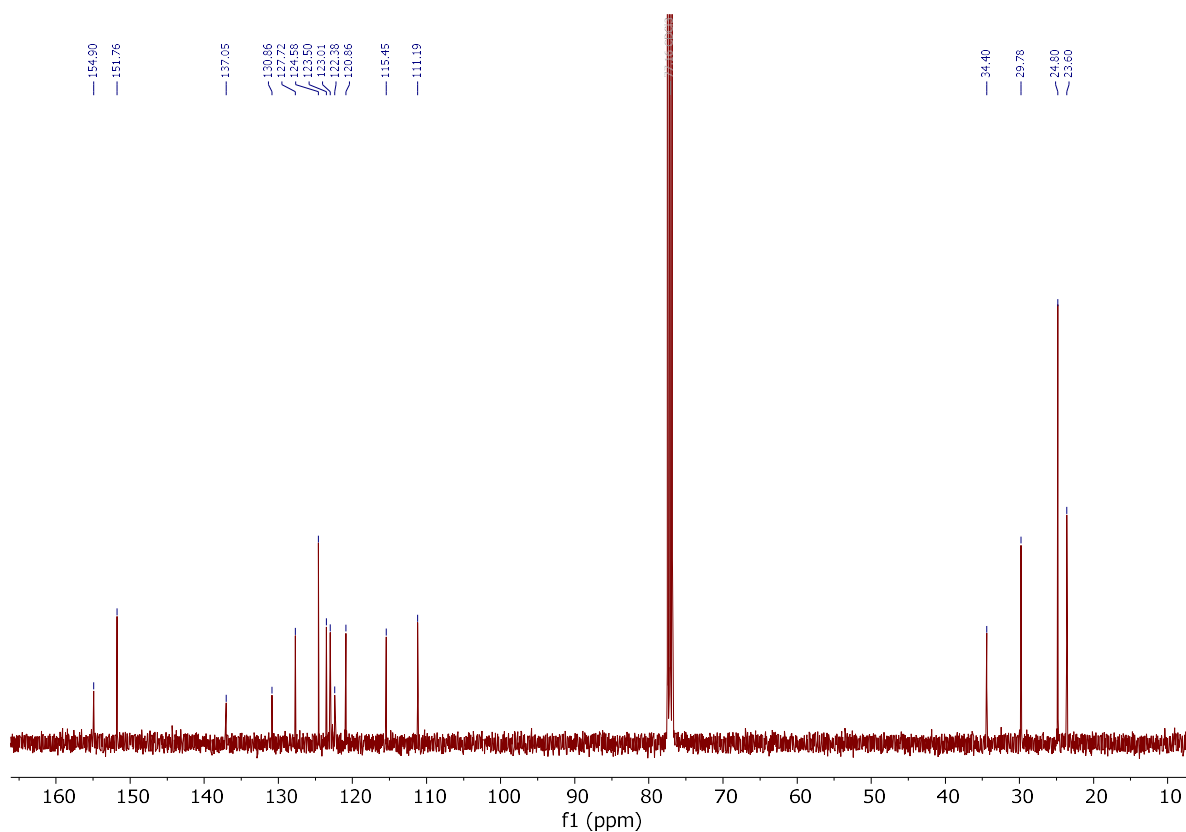

Figure S52: <sup>13</sup>C NMR of 3-(thiophen-2-yl)-1-((2,4,6-triisopropylphenyl)sulfonyl)-1H-pyrrole **5f** in CDCl<sub>3</sub>

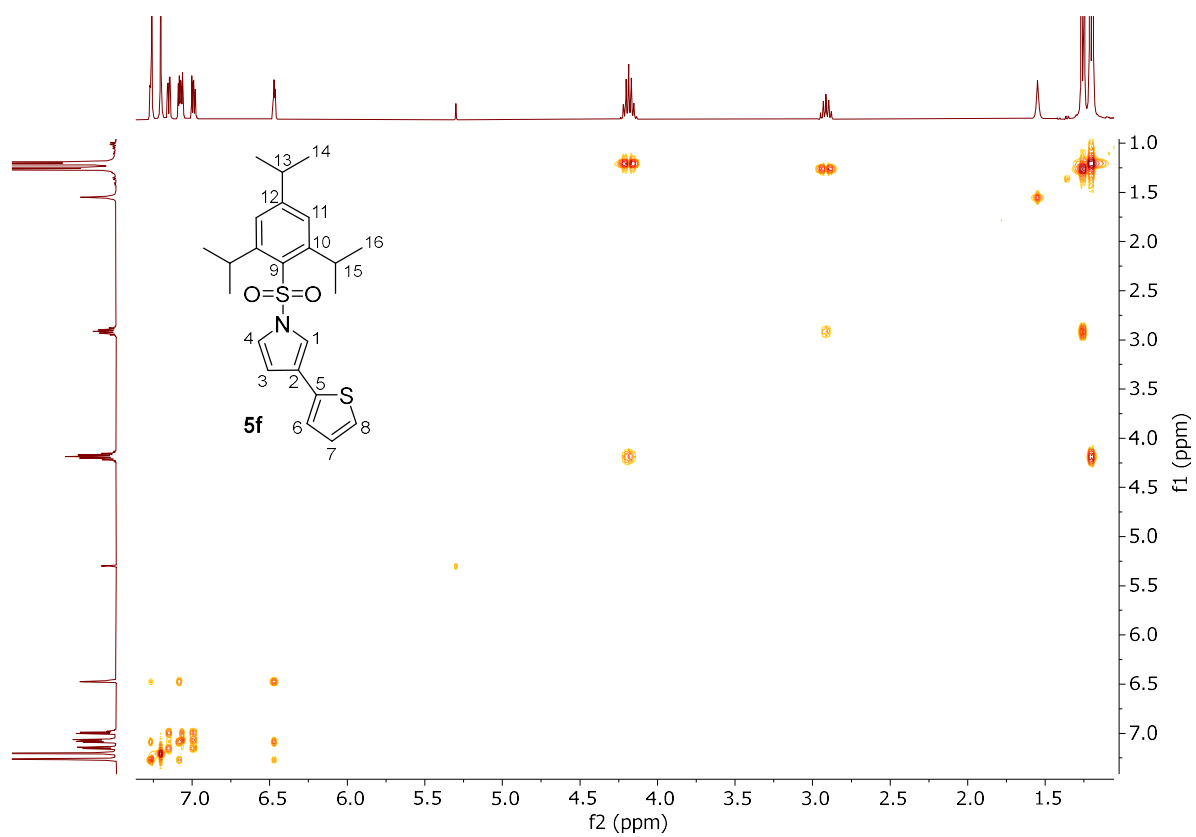

Figure S53: COSY NMR of 3-(thiophen-2-yl)-1-((2,4,6-triisopropylphenyl)sulfonyl)-1H-pyrrole **5f** in  $\text{CDCl}_3$

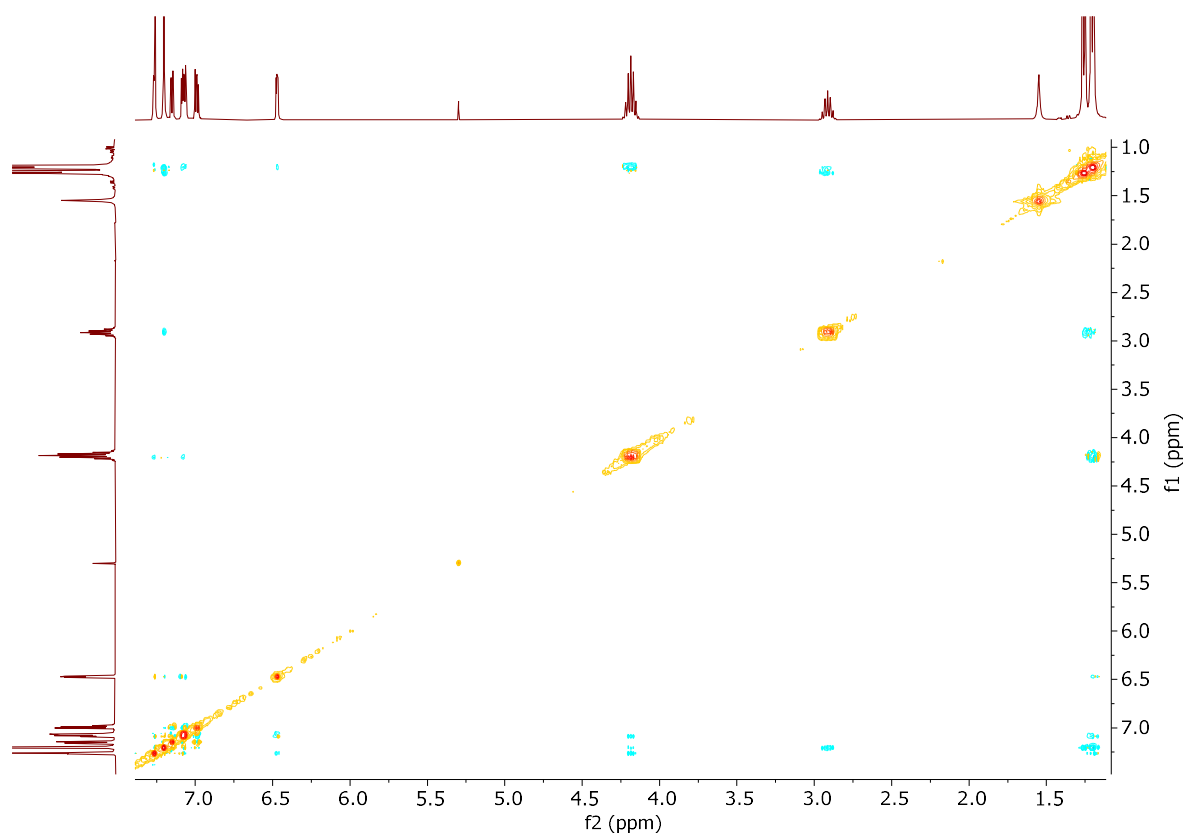

Figure S54: NOESY NMR of 3-(thiophen-2-yl)-1-((2,4,6-triisopropylphenyl)sulfonyl)-1H-pyrrole **5f** in  $\text{CDCl}_3$

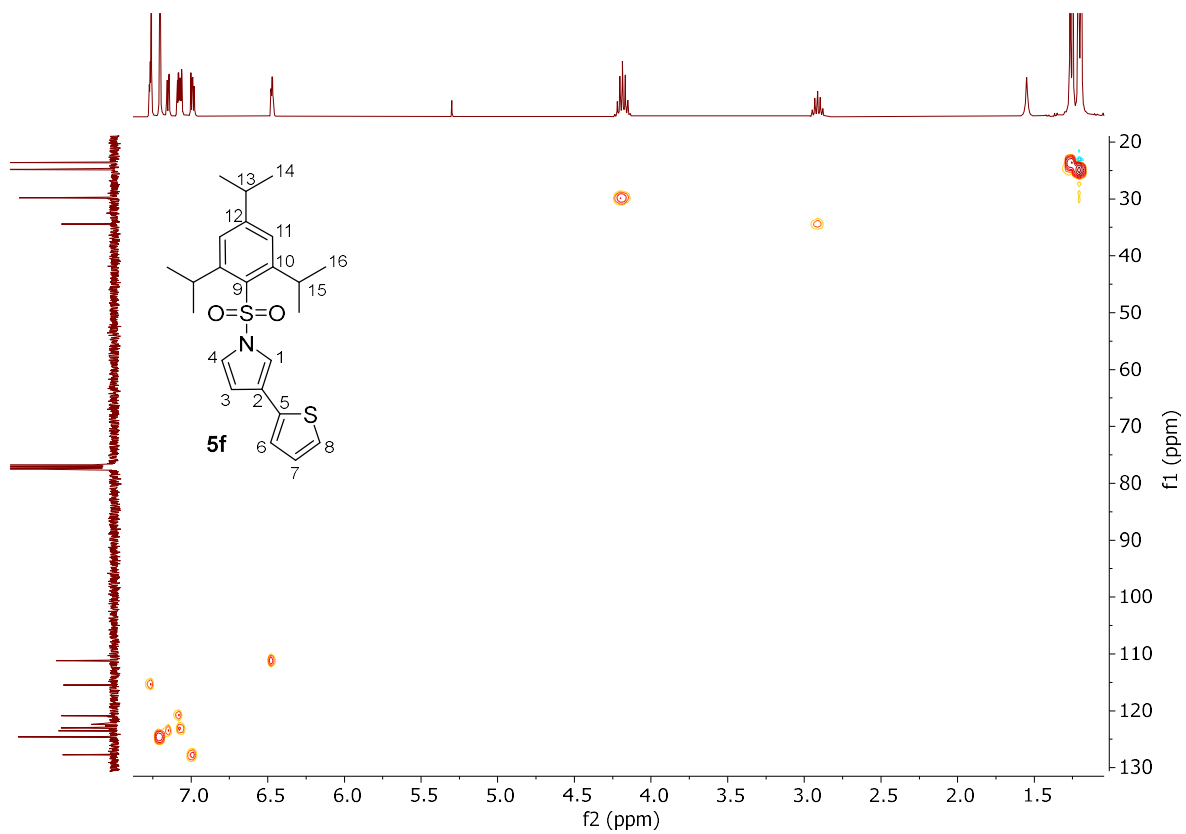

Figure S55: HSQC NMR of 3-(thiophen-2-yl)-1-((2,4,6-triisopropylphenyl)sulfonyl)-1H-pyrrole **5f** in  $CDCl_3$

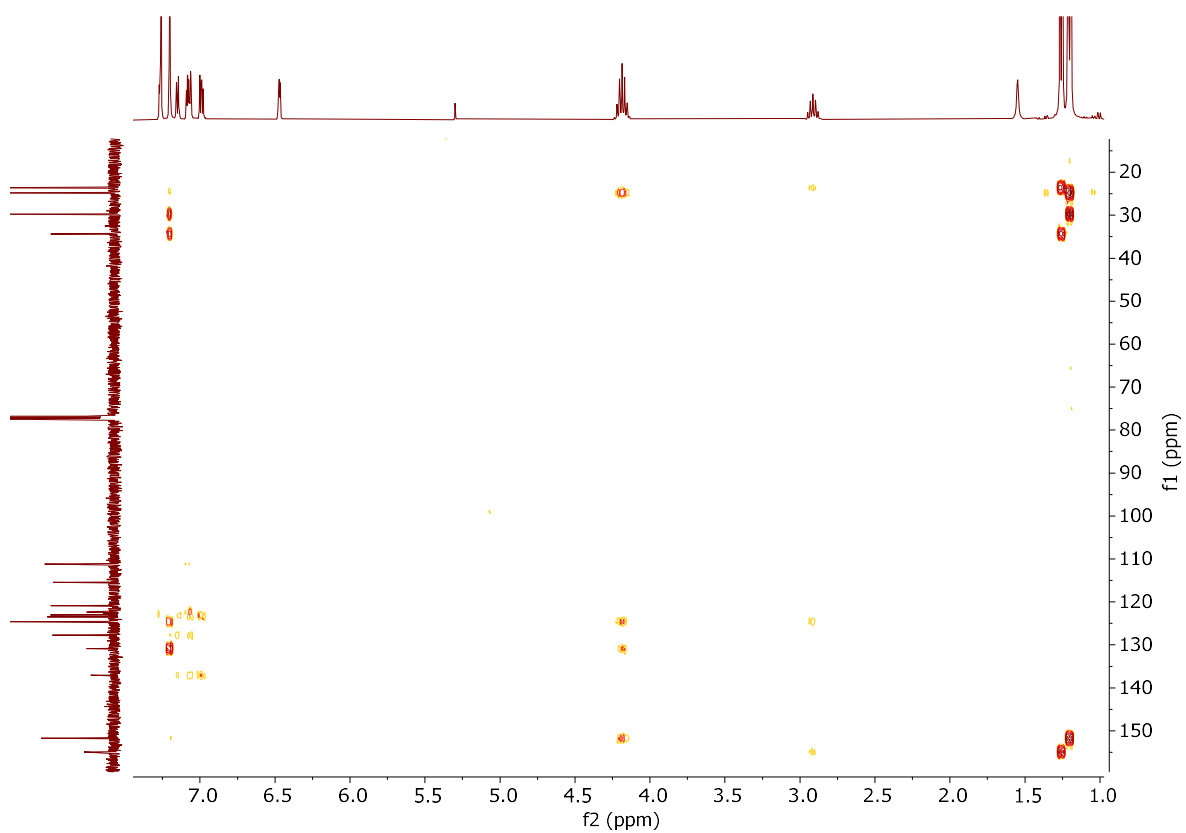

Figure S56: HMBC NMR of 3-(thiophen-2-yl)-1-((2,4,6-triisopropylphenyl)sulfonyl)-1H-pyrrole **5f** in  $CDCl_3$

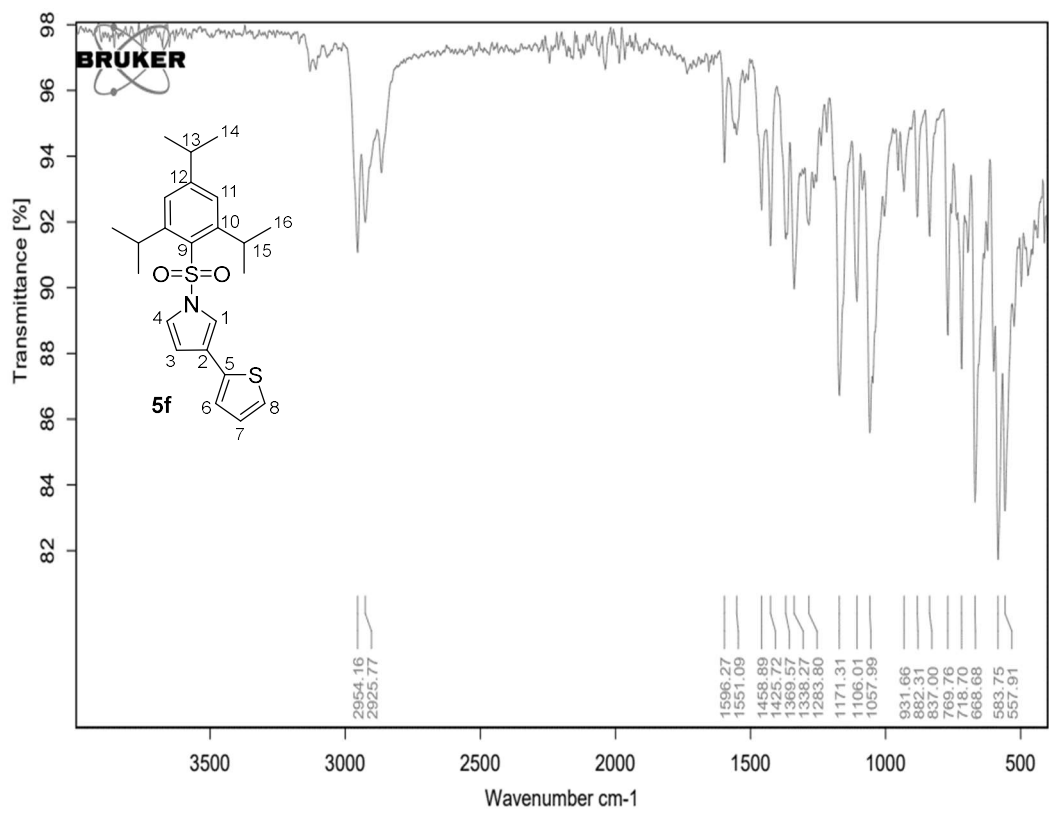

Figure S57: IR spectrum of 3-(thiophen-2-yl)-1-((2,4,6-triisopropylphenyl)sulfonyl)-1H-pyrrole **5f**

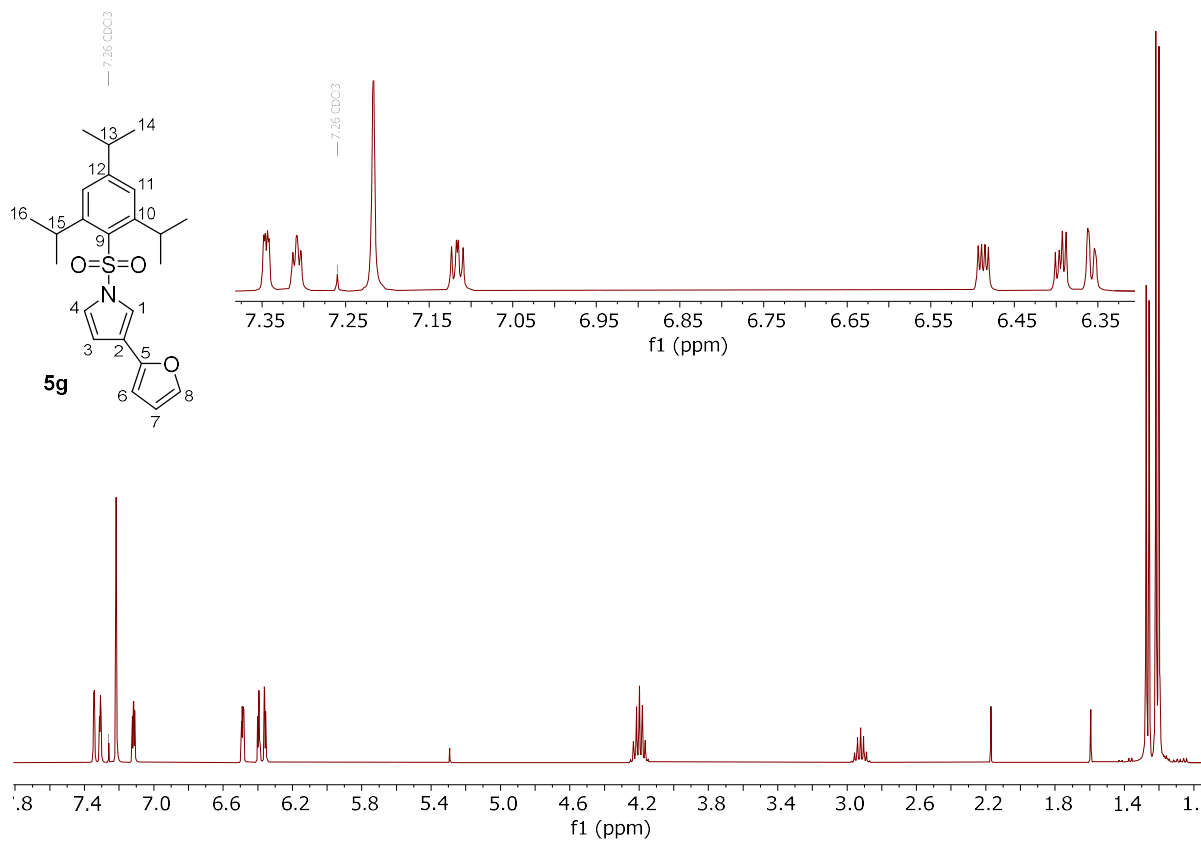

Figure S58: <sup>1</sup>H NMR spectrum of 3-(furan-2-yl)-1-((2,4,6-triisopropylphenyl)sulfonyl)-1H-pyrrole **5g** in CDCl<sub>3</sub>

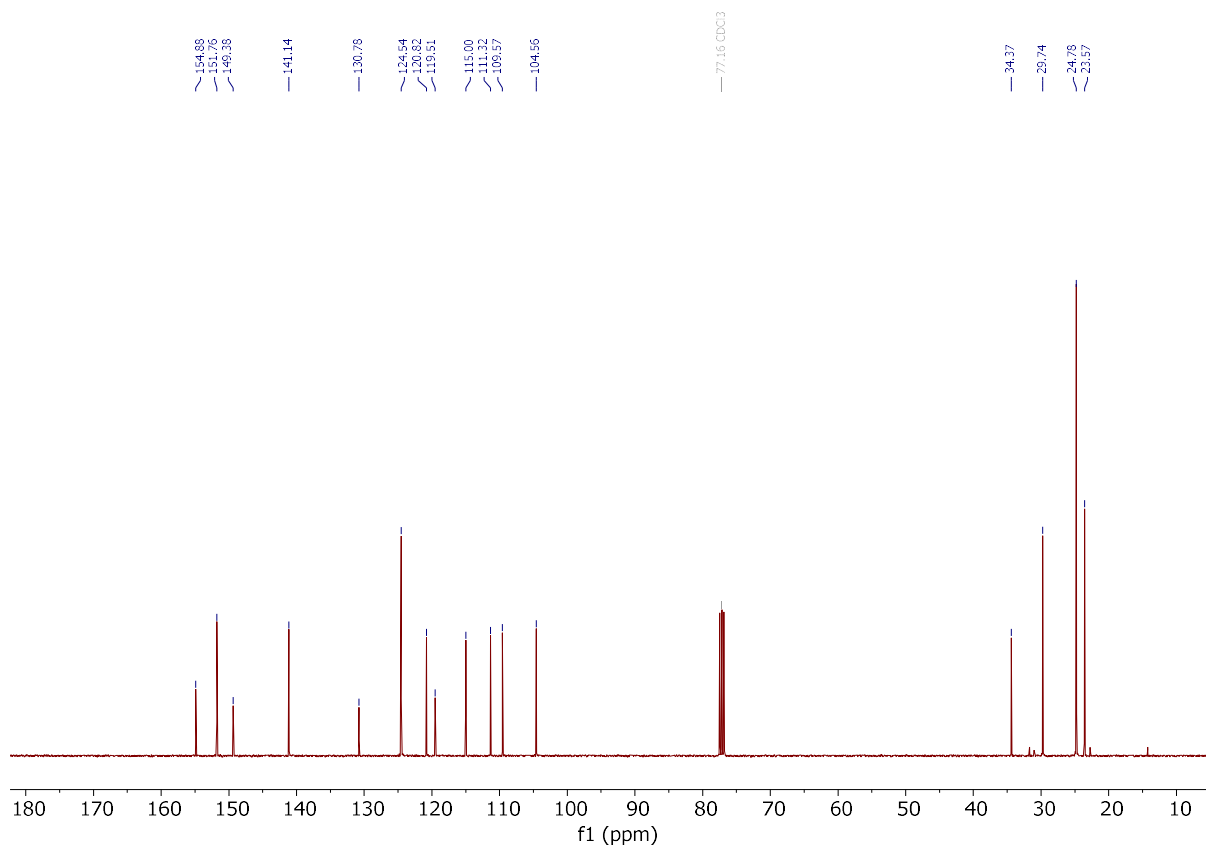

Figure S59: <sup>13</sup>C NMR spectrum of 3-(furan-2-yl)-1-((2,4,6-triisopropylphenyl)sulfonyl)-1H-pyrrole **5g** in CDCl<sub>3</sub>



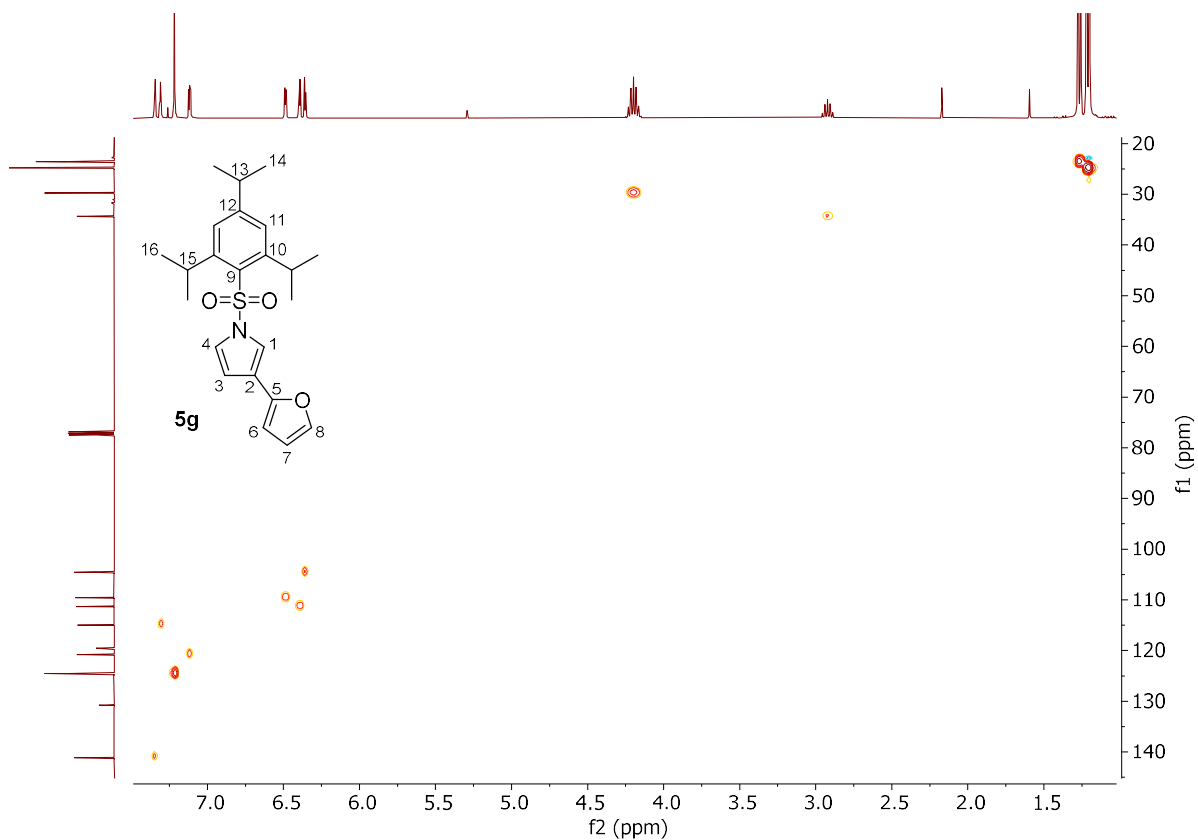

Figure S62: HSQC NMR spectrum of 3-(furan-2-yl)-1-((2,4,6-triisopropylphenyl)sulfonyl)-1H-pyrrole **5g** in  $CDCl_3$

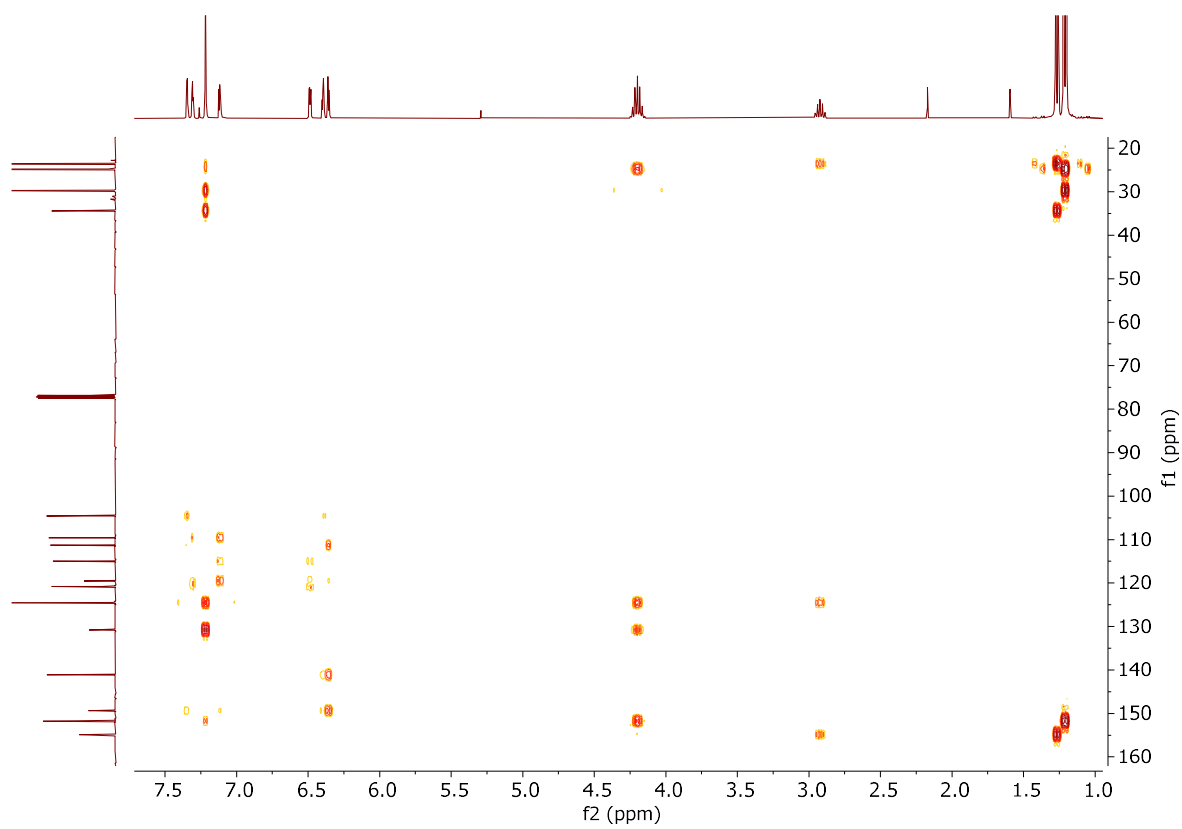

Figure S63: HMBC NMR spectrum of 3-(furan-2-yl)-1-((2,4,6-triisopropylphenyl)sulfonyl)-1H-pyrrole **5g** in  $CDCl_3$

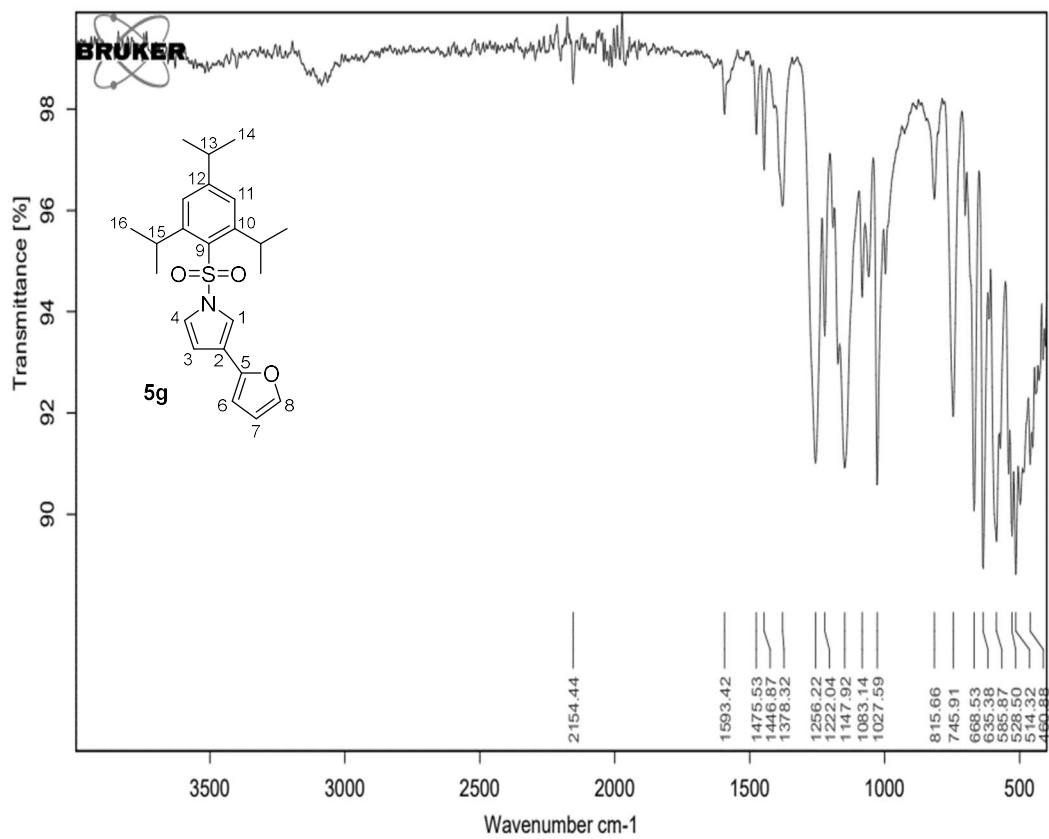

Figure S64: IR spectrum of 3-(furan-2-yl)-1-((2,4,6-triisopropylphenyl)sulfonyl)-1H-pyrrole **5g**



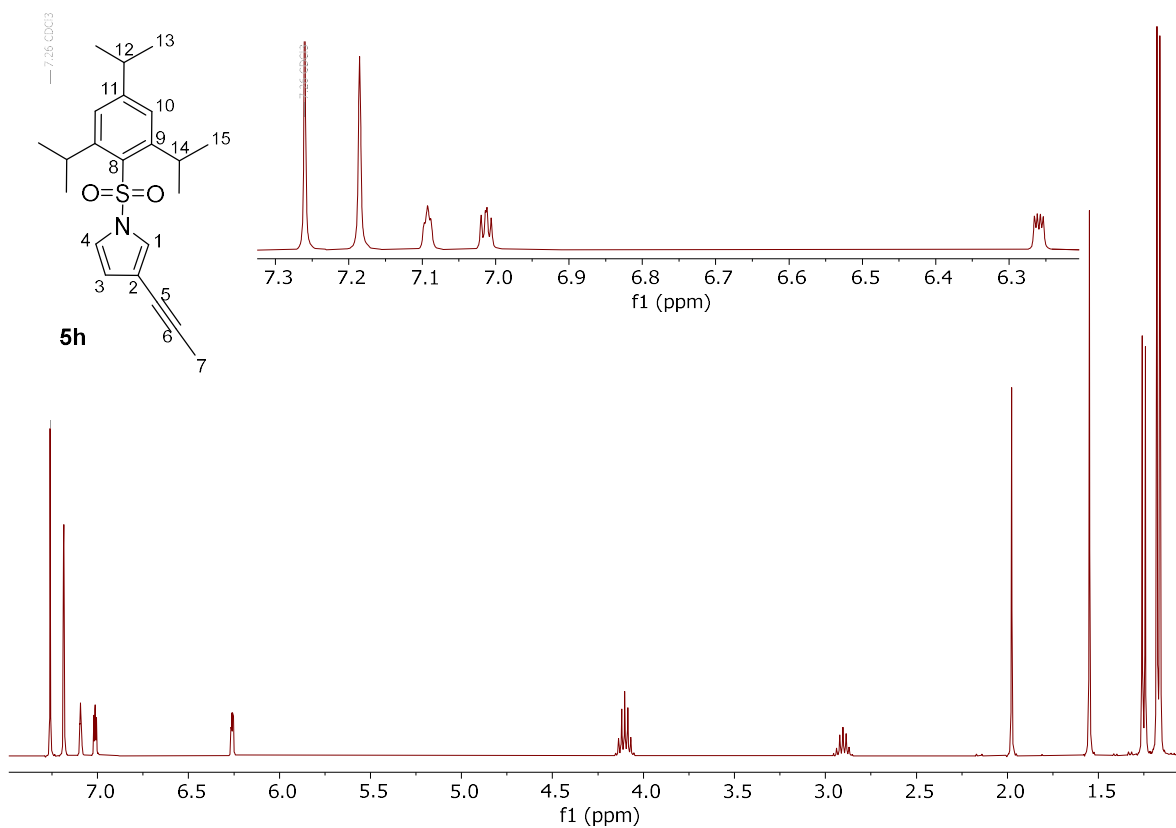

Figure S65:  $^1\text{H}$  NMR spectrum of 3-(prop-1-yn-1-yl)-1-((2,4,6-triisopropylphenyl)sulfonyl)-1H-pyrrole **5h** in  $\text{CDCl}_3$

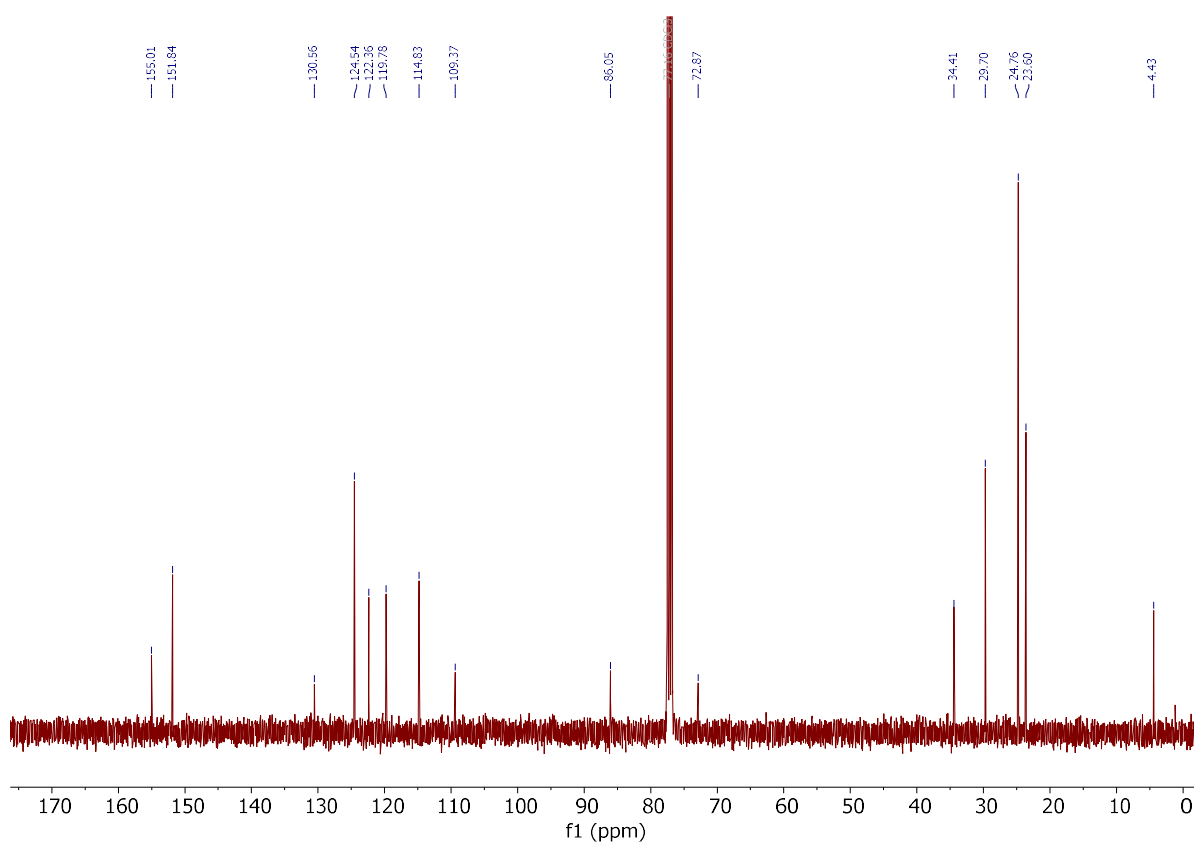

Figure S66:  $^{13}\text{C}$  NMR spectrum of 3-(prop-1-yn-1-yl)-1-((2,4,6-triisopropylphenyl)sulfonyl)-1H-pyrrole **5h** in  $\text{CDCl}_3$

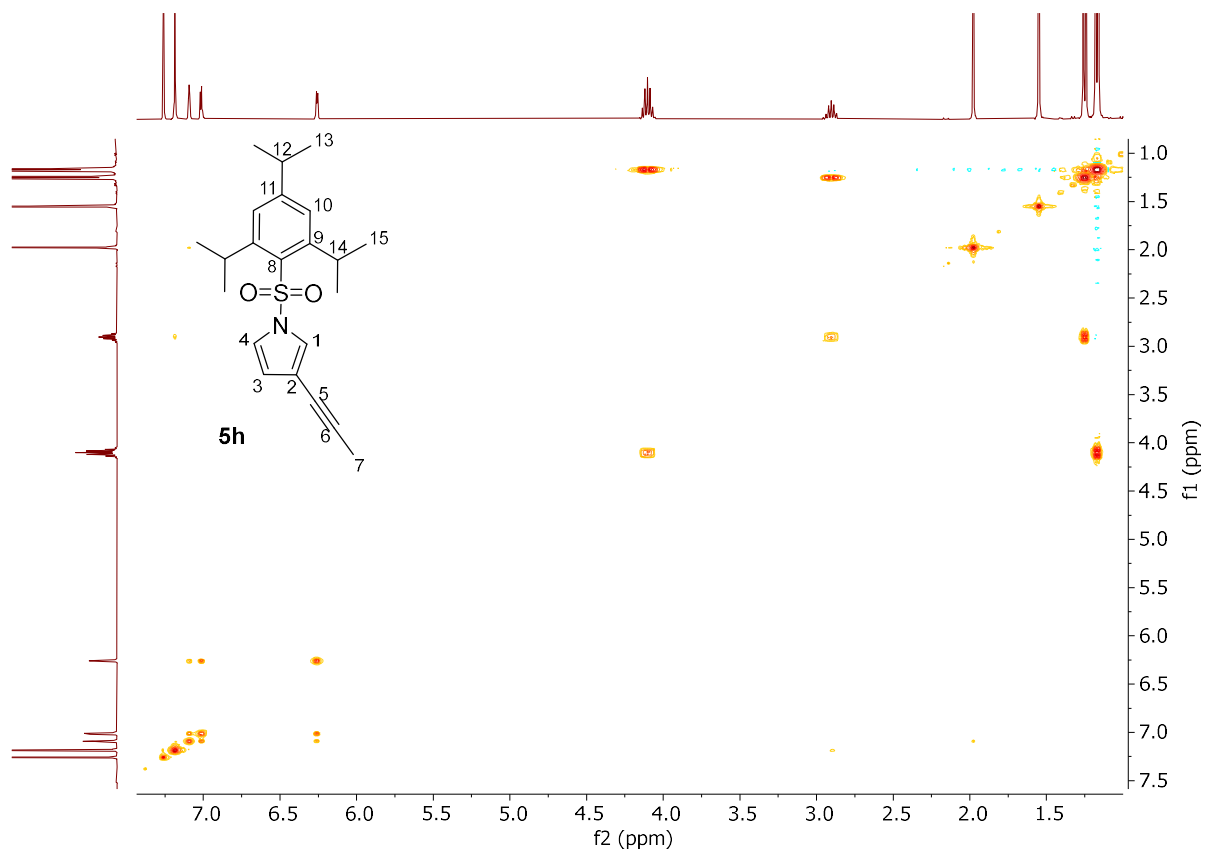

Figure S67: COSY NMR spectrum of 3-(prop-1-yn-1-yl)-1-((2,4,6-triisopropylphenyl)sulfonyl)-1H-pyrrole **5h** in  $CDCl_3$

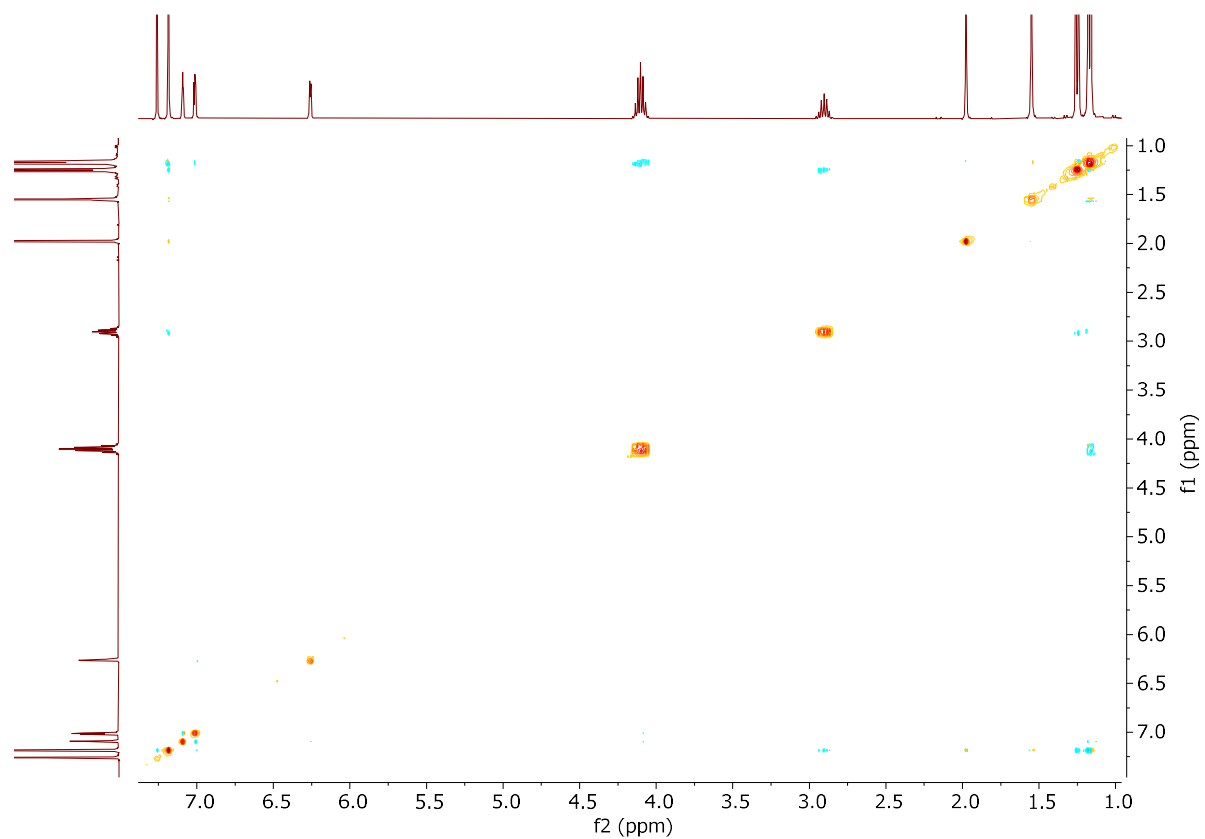

Figure S68: NOESY NMR spectrum of 3-(prop-1-yn-1-yl)-1-((2,4,6-triisopropylphenyl)sulfonyl)-1H-pyrrole **5h** in  $CDCl_3$

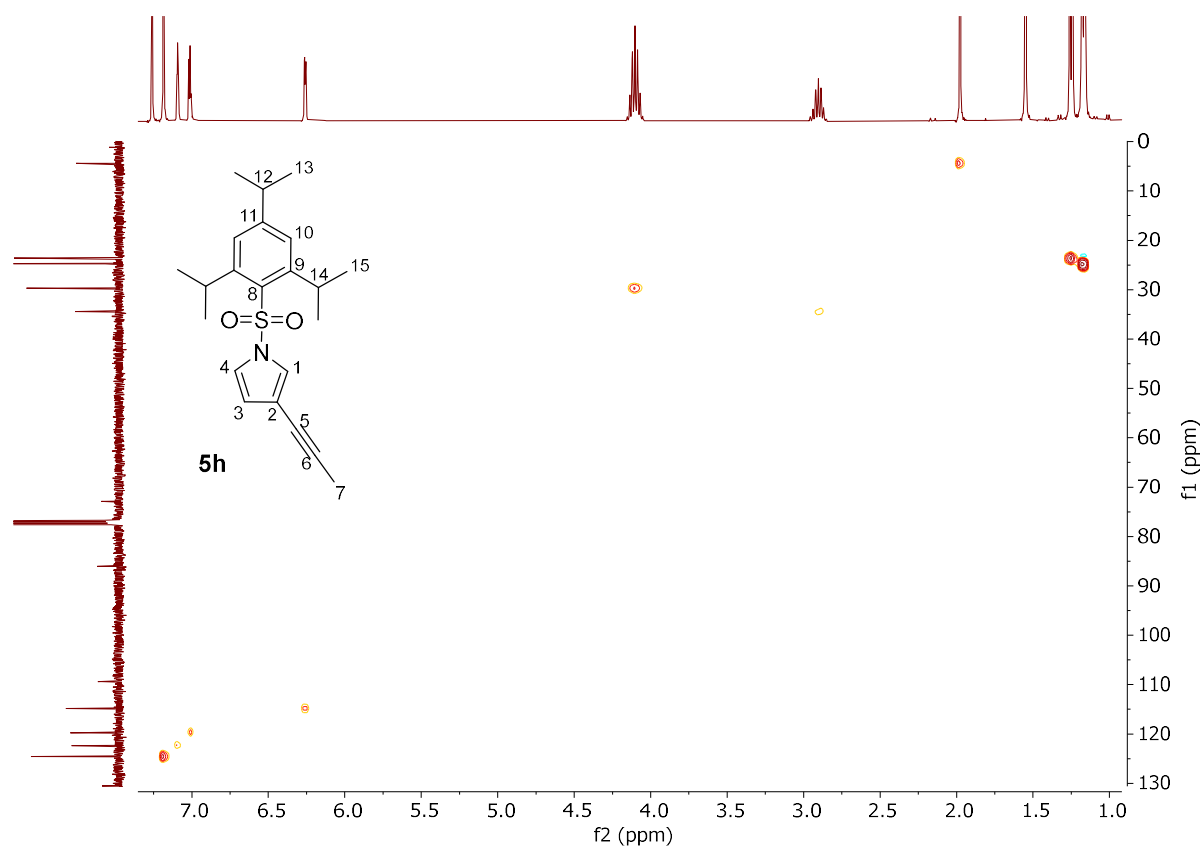

Figure S69: HSQC NMR spectrum of 3-(prop-1-yn-1-yl)-1-((2,4,6-triisopropylphenyl)sulfonyl)-1H-pyrrole **5h** in CDCl<sub>3</sub>

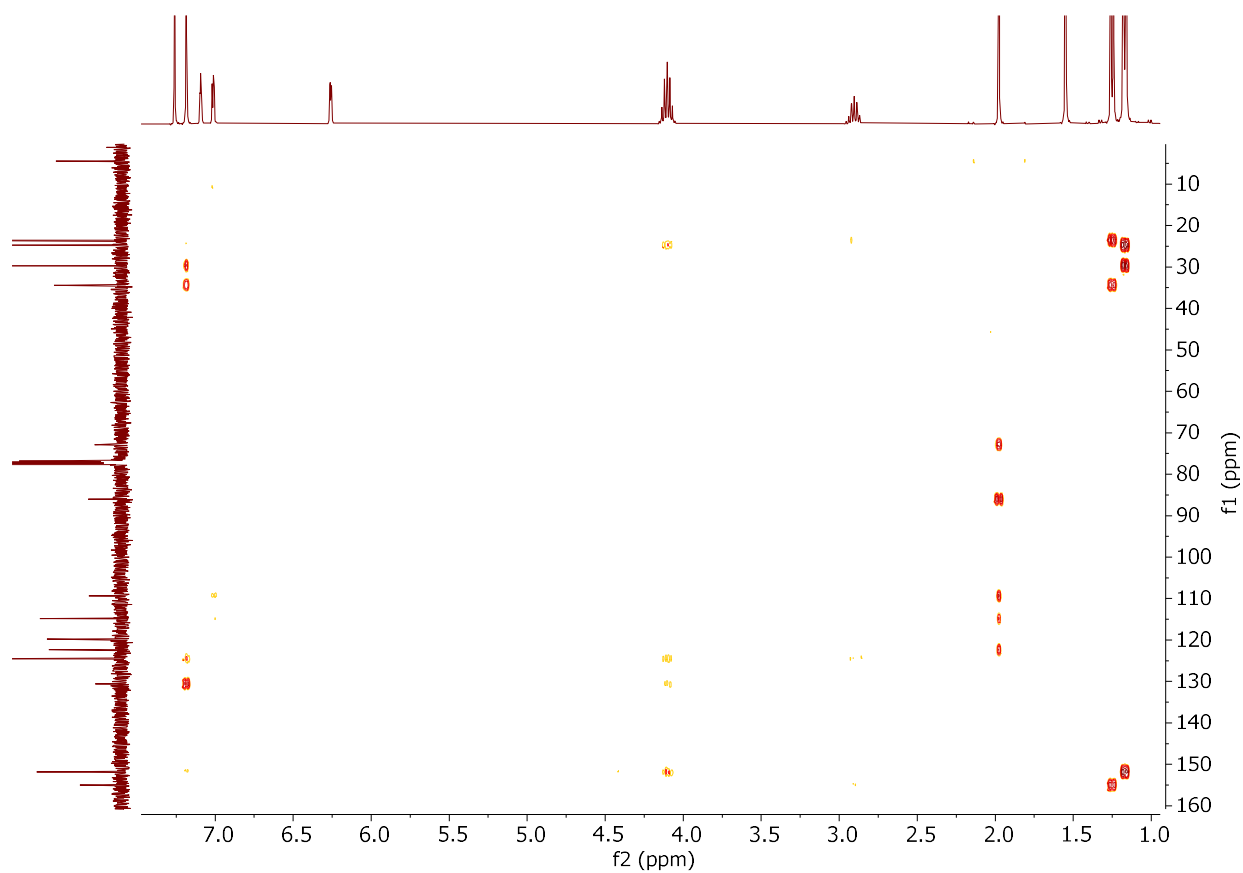

Figure S70: HMBC NMR spectrum of 3-(prop-1-yn-1-yl)-1-((2,4,6-triisopropylphenyl)sulfonyl)-1H-pyrrole **5h** in CDCl<sub>3</sub>

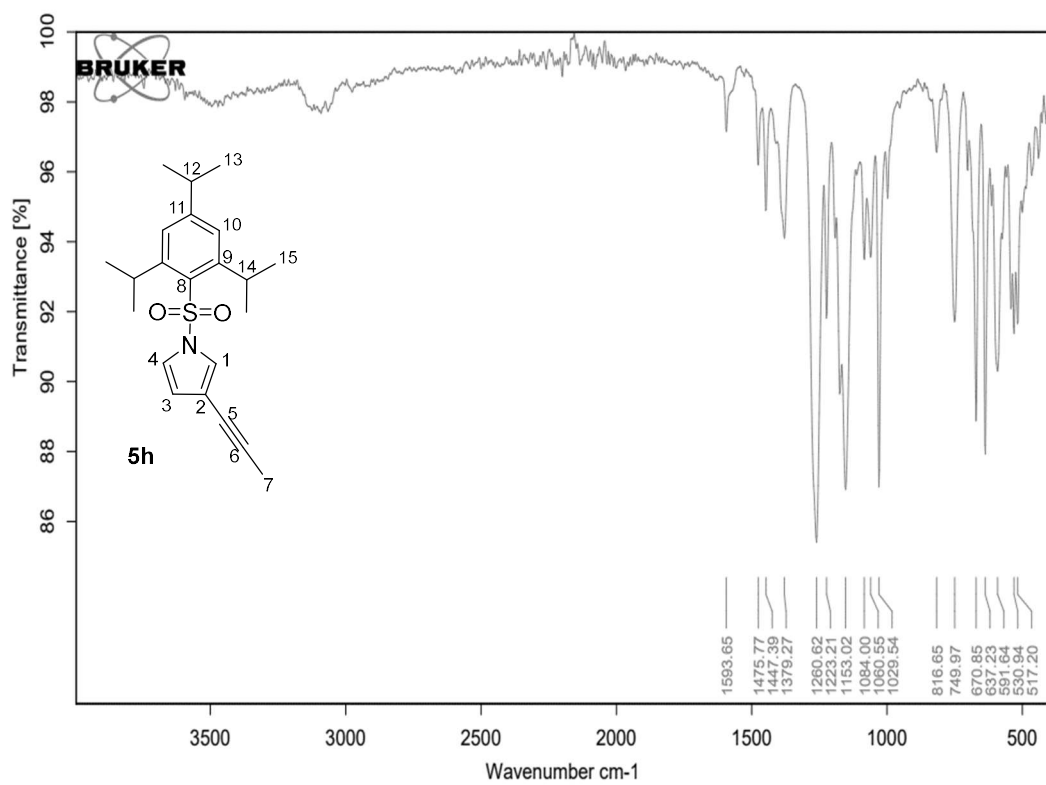

Figure S71: IR spectrum of 3-(prop-1-yn-1-yl)-1-((2,4,6-triisopropylphenyl)sulfonyl)-1H-pyrrole **5h**



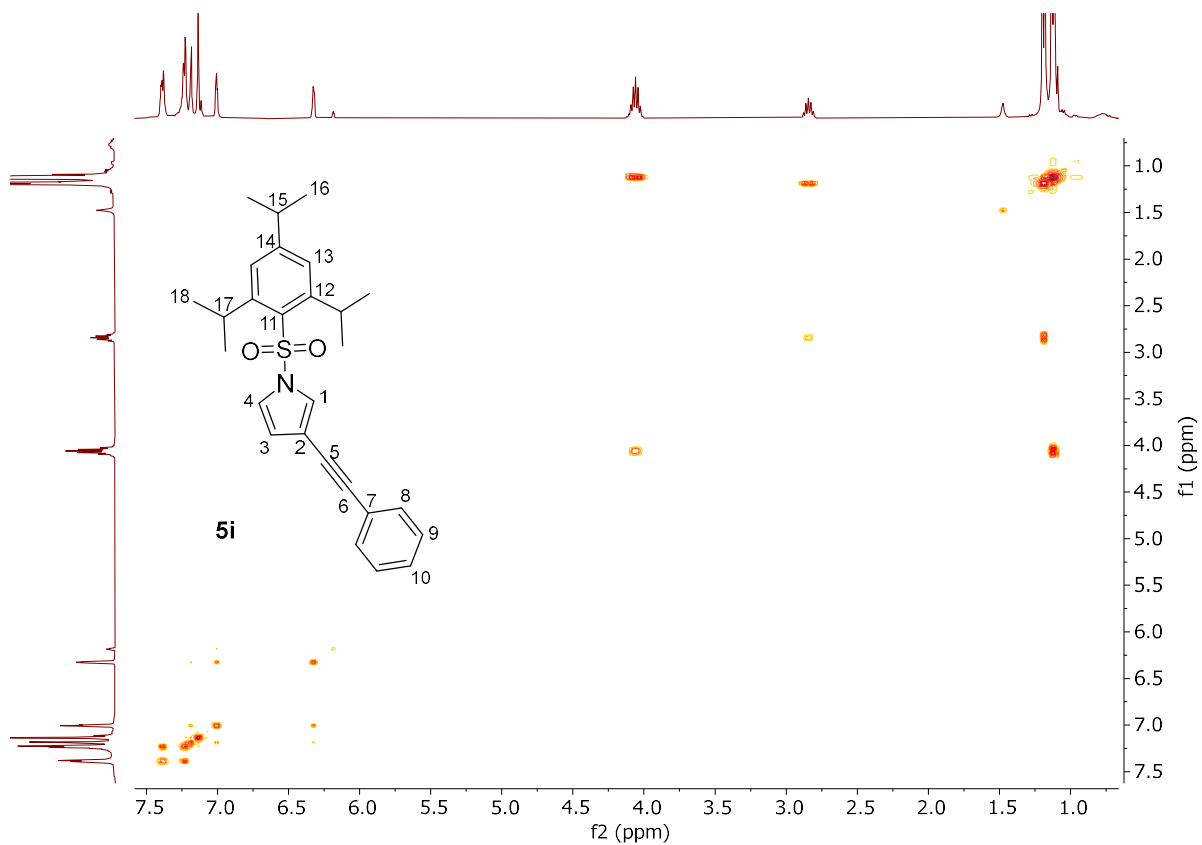

Figure S74: COSY NMR spectrum of 3-(phenylethynyl)-1-((2,4,6-trisopropylphenyl)sulfonyl)-1H-pyrrole **5i** in CDCl<sub>3</sub>

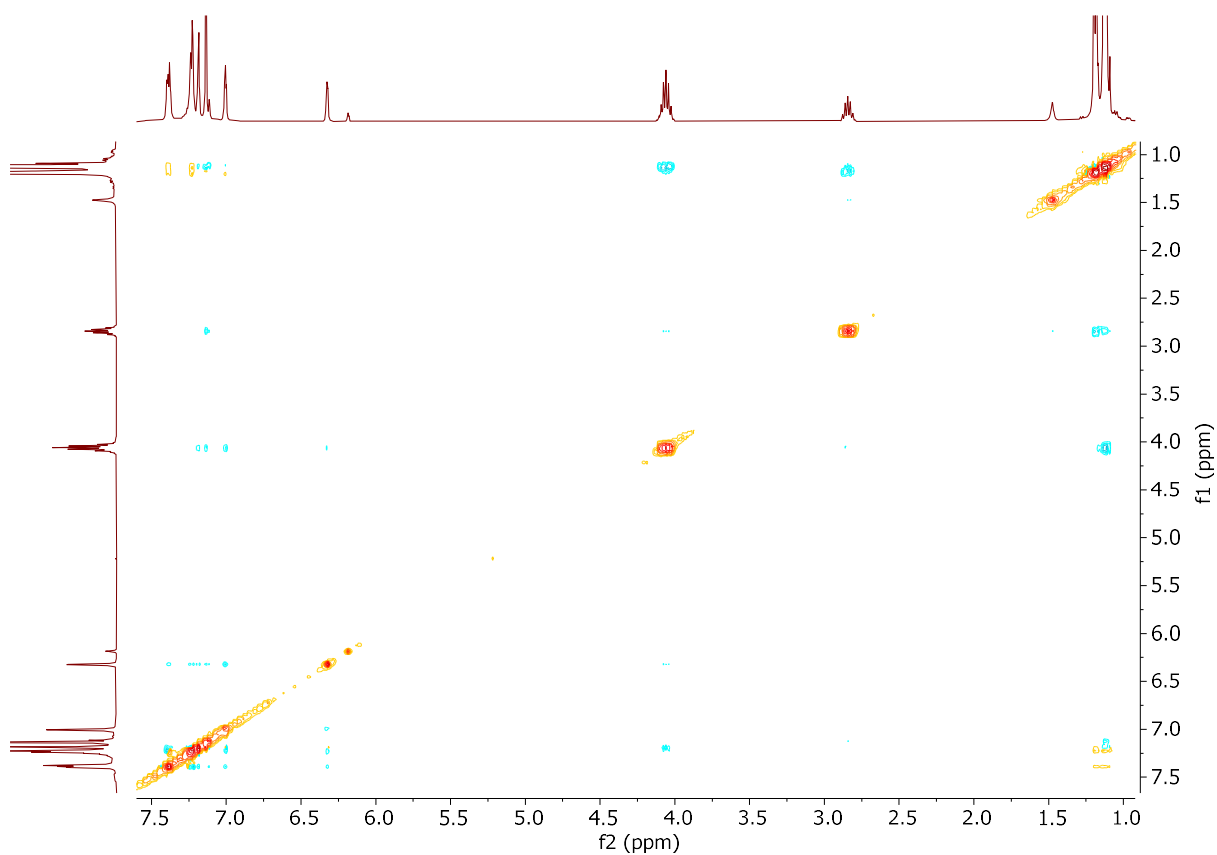

Figure S75: NOESY NMR spectrum of 3-(phenylethynyl)-1-((2,4,6-trisopropylphenyl)sulfonyl)-1H-pyrrole **5i** in CDCl<sub>3</sub>

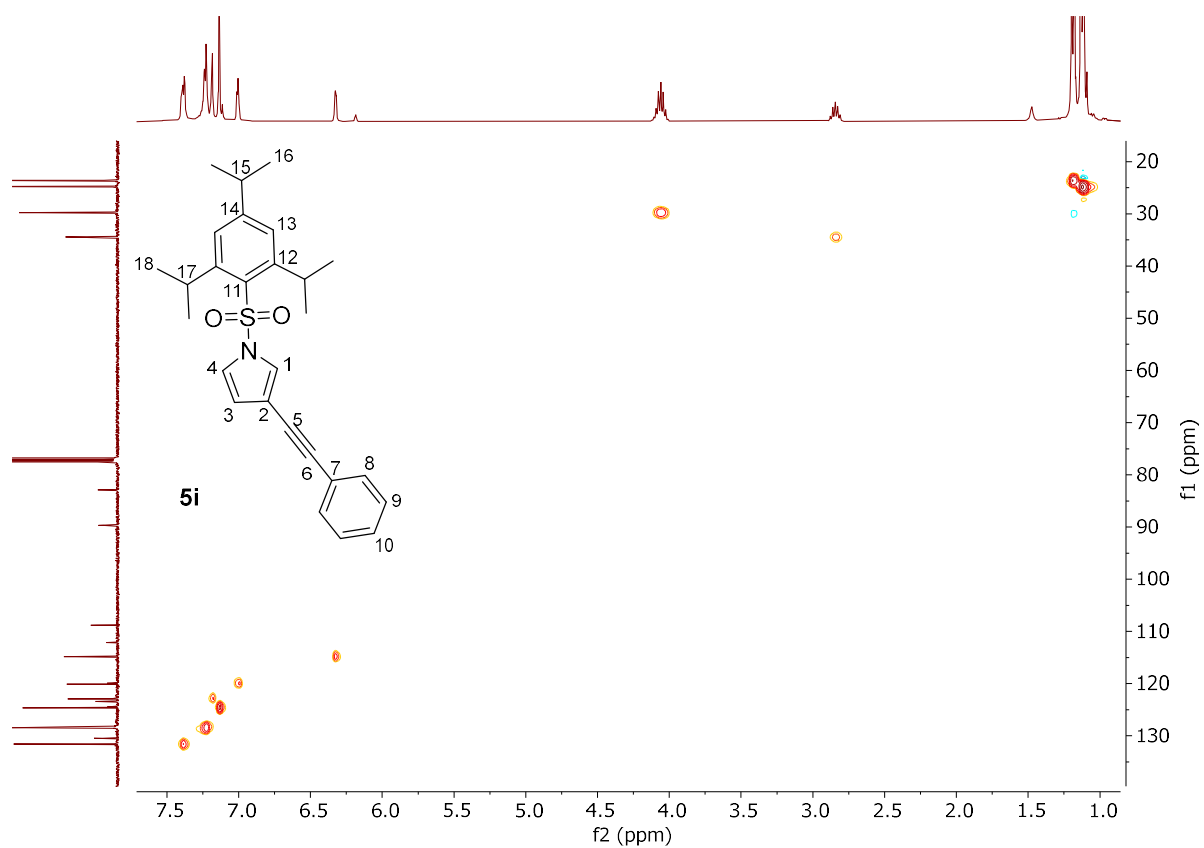

Figure S76: HSQC NMR spectrum of 3-(phenylethynyl)-1-((2,4,6-triisopropylphenyl)sulfonyl)-1H-pyrrole **5i** in CDCl<sub>3</sub>

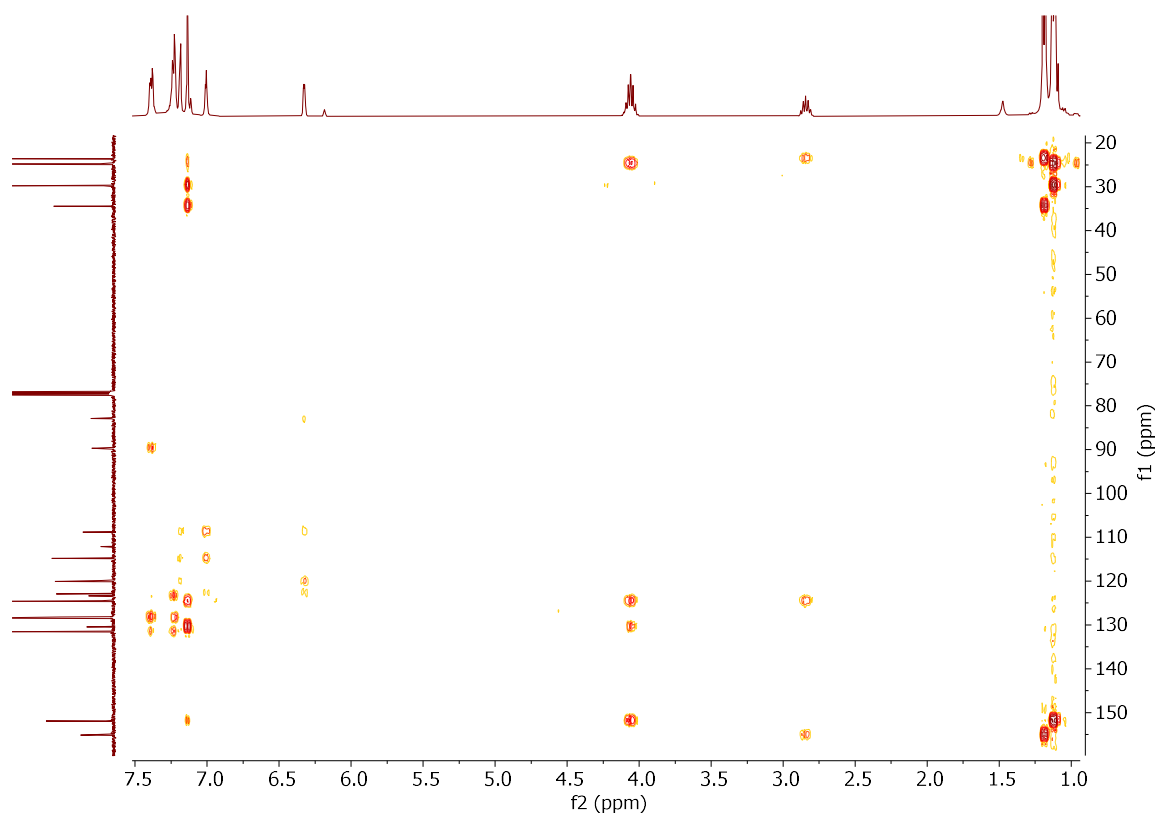

Figure S77: HMBC NMR spectrum of 3-(phenylethynyl)-1-((2,4,6-triisopropylphenyl)sulfonyl)-1H-pyrrole **5i** in CDCl<sub>3</sub>

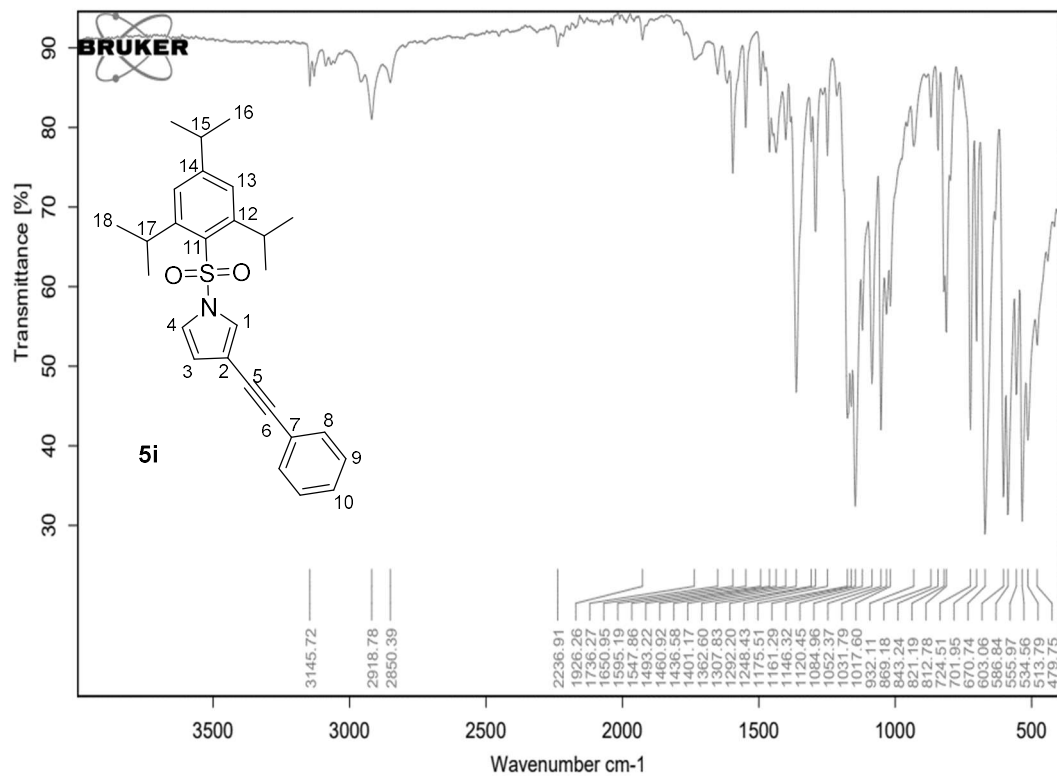

Figure S78: IR spectrum of 3-(phenylethynyl)-1-((2,4,6-triisopropylphenyl)sulfonyl)-1H-pyrrole **5i**



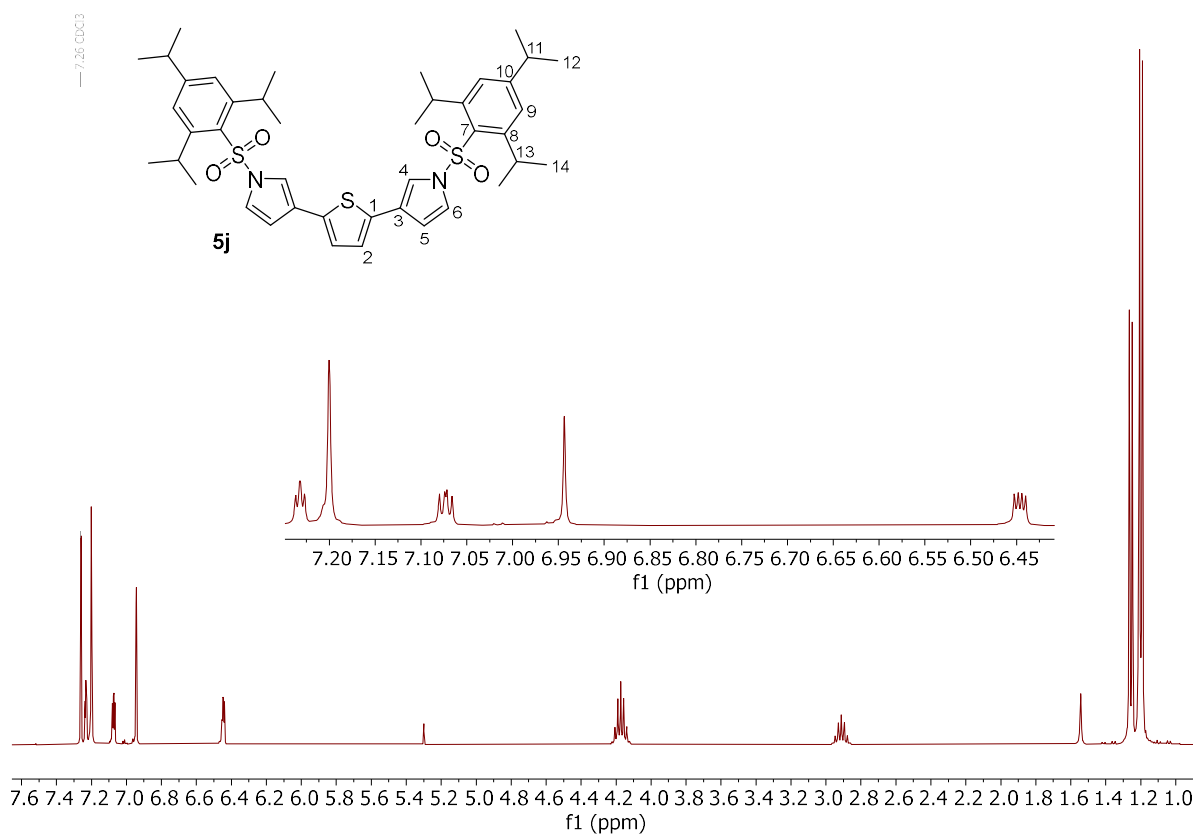

Figure S79: <sup>1</sup>H NMR spectrum of 2,5-bis(1-((2,4,6-triisopropylphenyl)sulfonyl)-1H-pyrrol-3-yl)thiophene **5j** in CDCl<sub>3</sub>

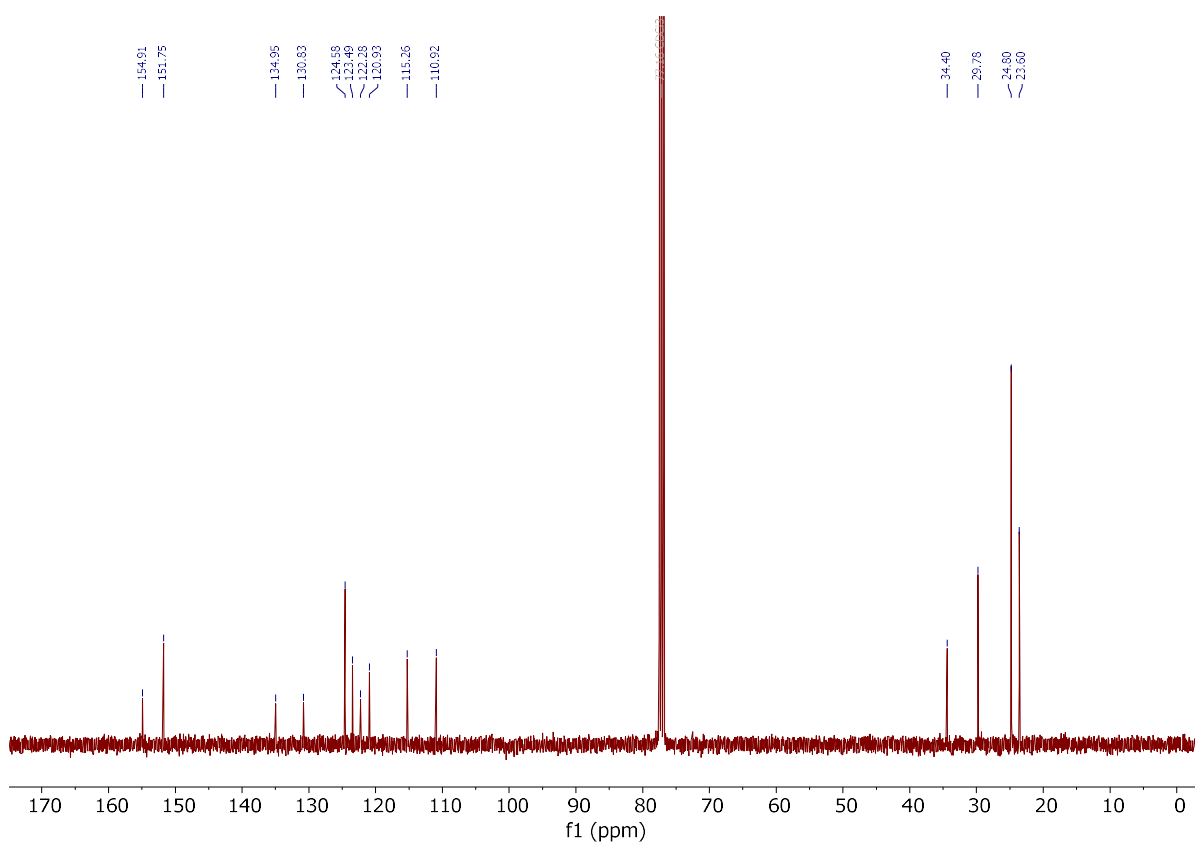

Figure S80: <sup>13</sup>C NMR spectrum of 2,5-bis(1-((2,4,6-triisopropylphenyl)sulfonyl)-1H-pyrrol-3-yl)thiophene **5j** in CDCl<sub>3</sub>

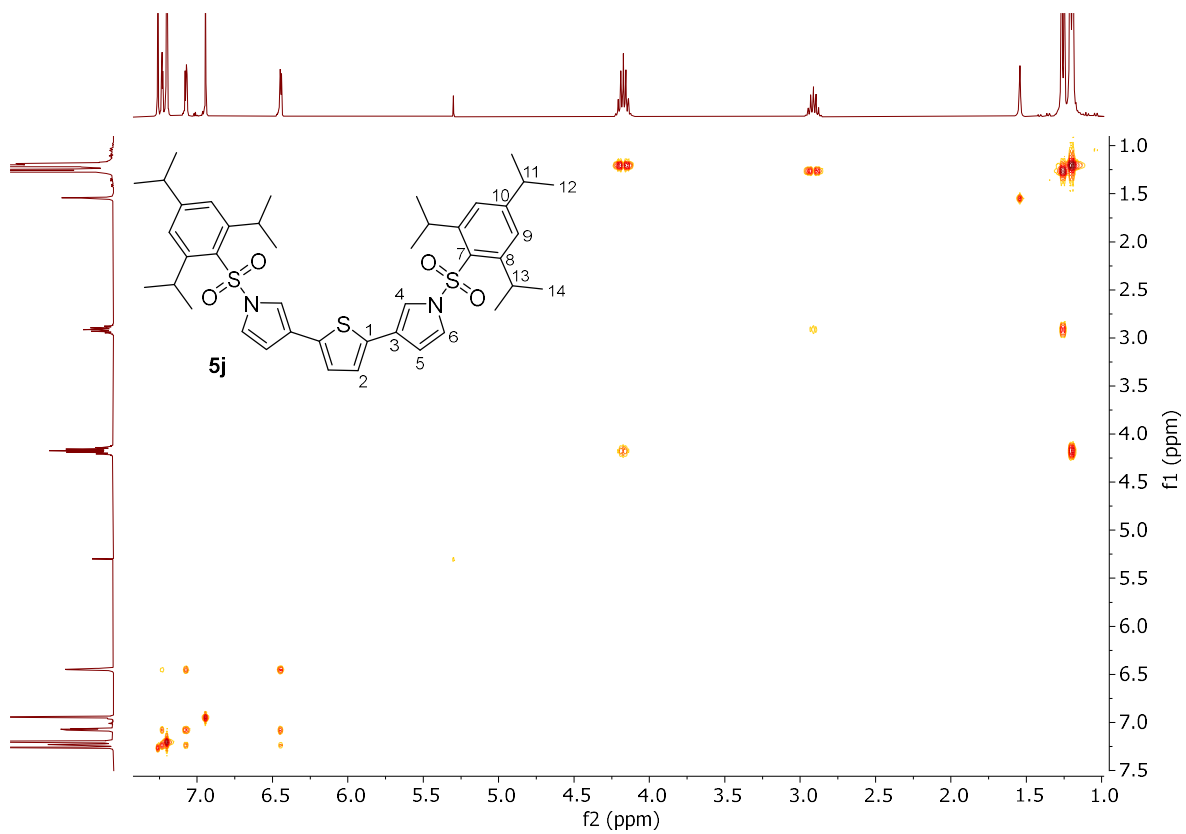

Figure S81: COSY NMR spectrum of 2,5-bis(1-((2,4,6-triisopropylphenyl)sulfonyl)-1H-pyrrol-3-yl)thiophene **5j** in  $CDCl_3$

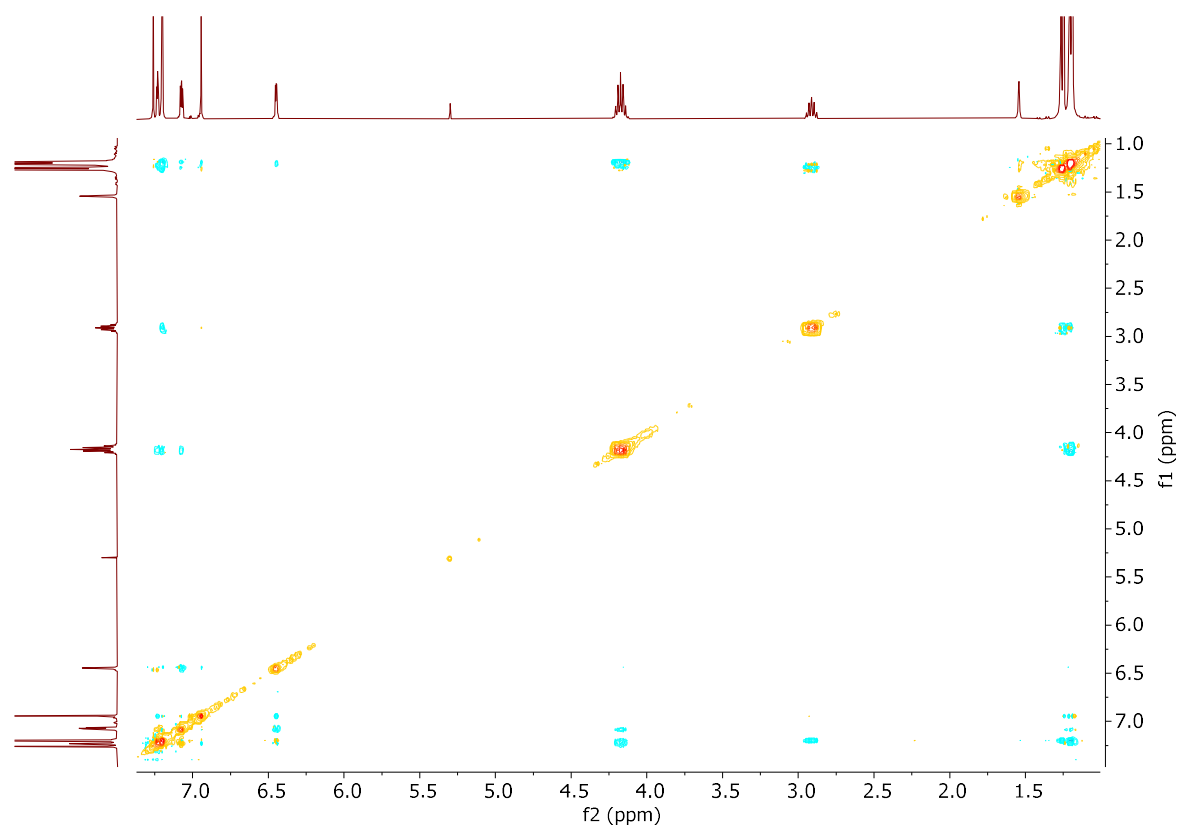

Figure S82: NOESY NMR spectrum of 2,5-bis(1-((2,4,6-triisopropylphenyl)sulfonyl)-1H-pyrrol-3-yl)thiophene **5j** in  $CDCl_3$

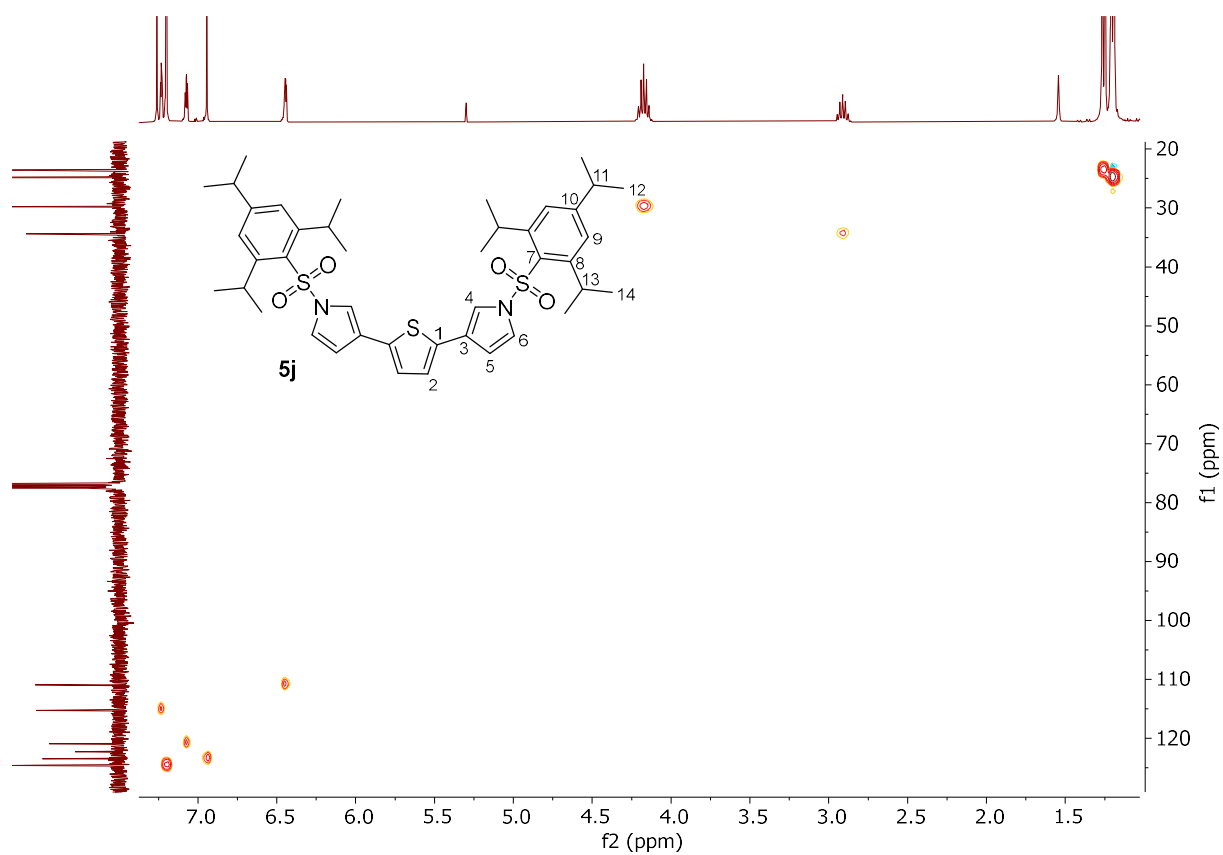

Figure S83: HSQC NMR spectrum of 2,5-bis(1-((2,4,6-triisopropylphenyl)sulfonyl)-1H-pyrrol-3-yl)thiophene **5j** in CDCl<sub>3</sub>

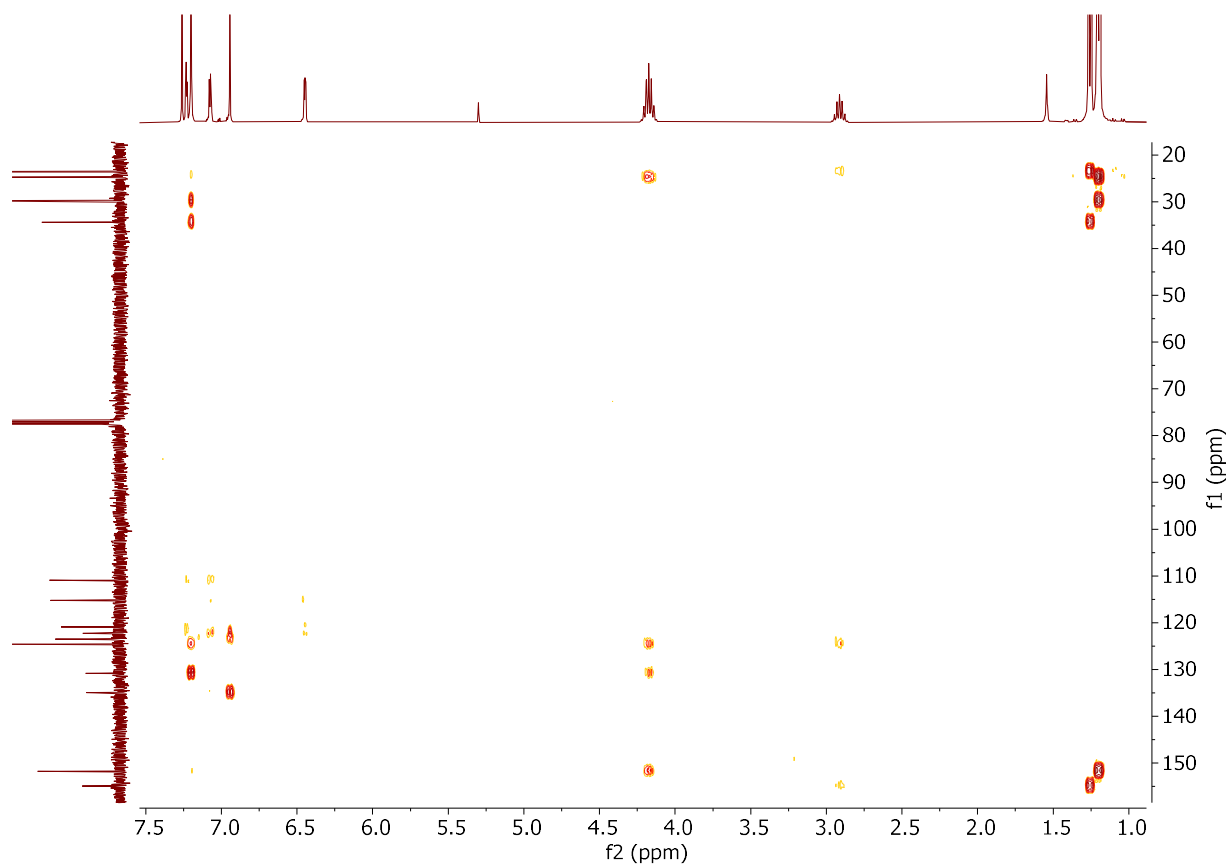

Figure S84: HMBC NMR spectrum of 2,5-bis(1-((2,4,6-triisopropylphenyl)sulfonyl)-1H-pyrrol-3-yl)thiophene **5j** in CDCl<sub>3</sub>

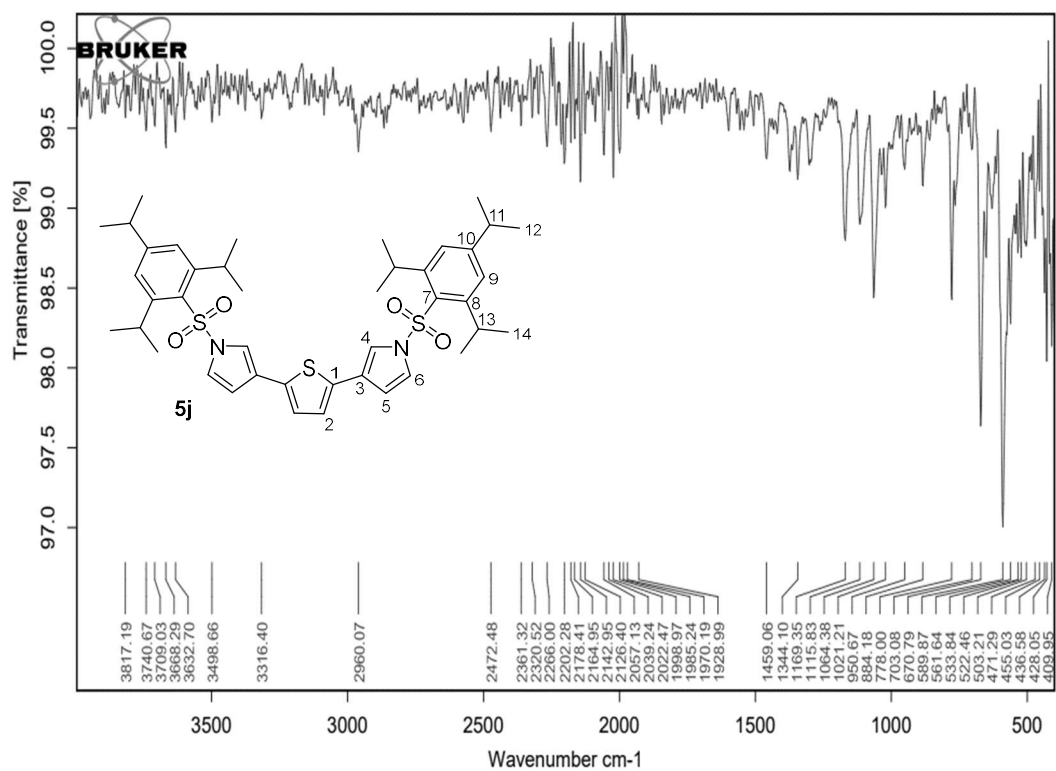

Figure S85: IR spectrum of spectrum of 2,5-bis(1-((2,4,6-triisopropylphenyl)sulfonyl)-1H-pyrrol-3-yl)thiophene 5j

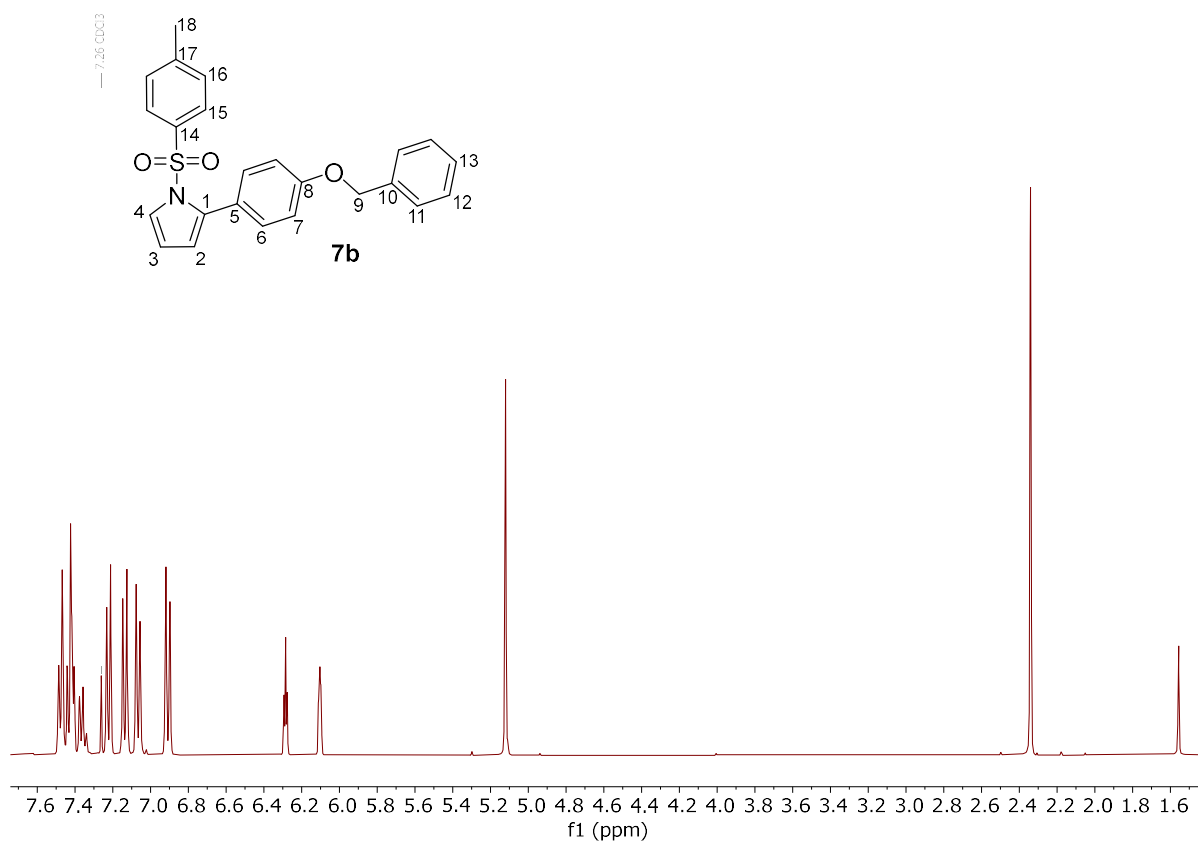

Figure S86:  $^1\text{H NMR}$  spectrum of 2-(4-(benzyloxy)phenyl)-1-(p-toluenesulfonyl)-1H-pyrrole **7b** in  $\text{CDCl}_3$ .

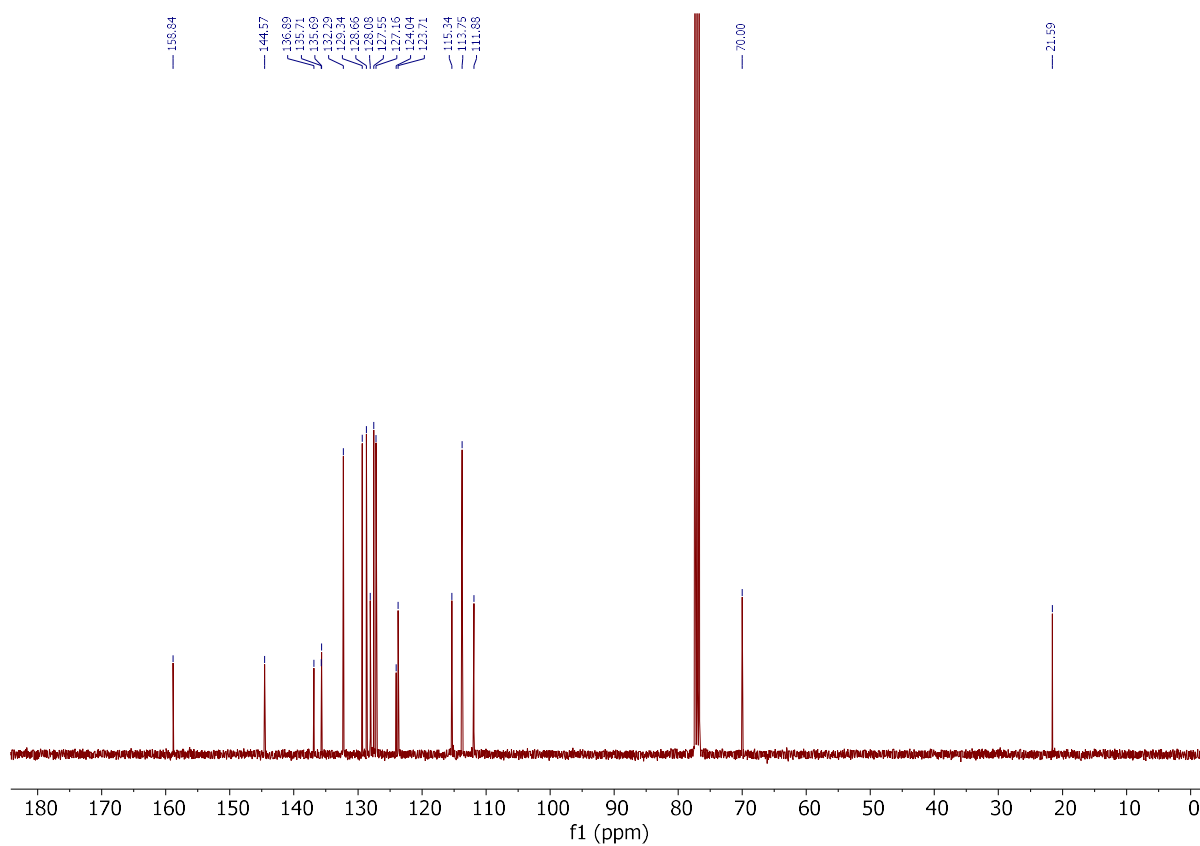

Figure S87:  $^{13}\text{C NMR}$  spectrum of 2-(4-(benzyloxy)phenyl)-1-(p-toluenesulfonyl)-1H-pyrrole **7b** in  $\text{CDCl}_3$ .

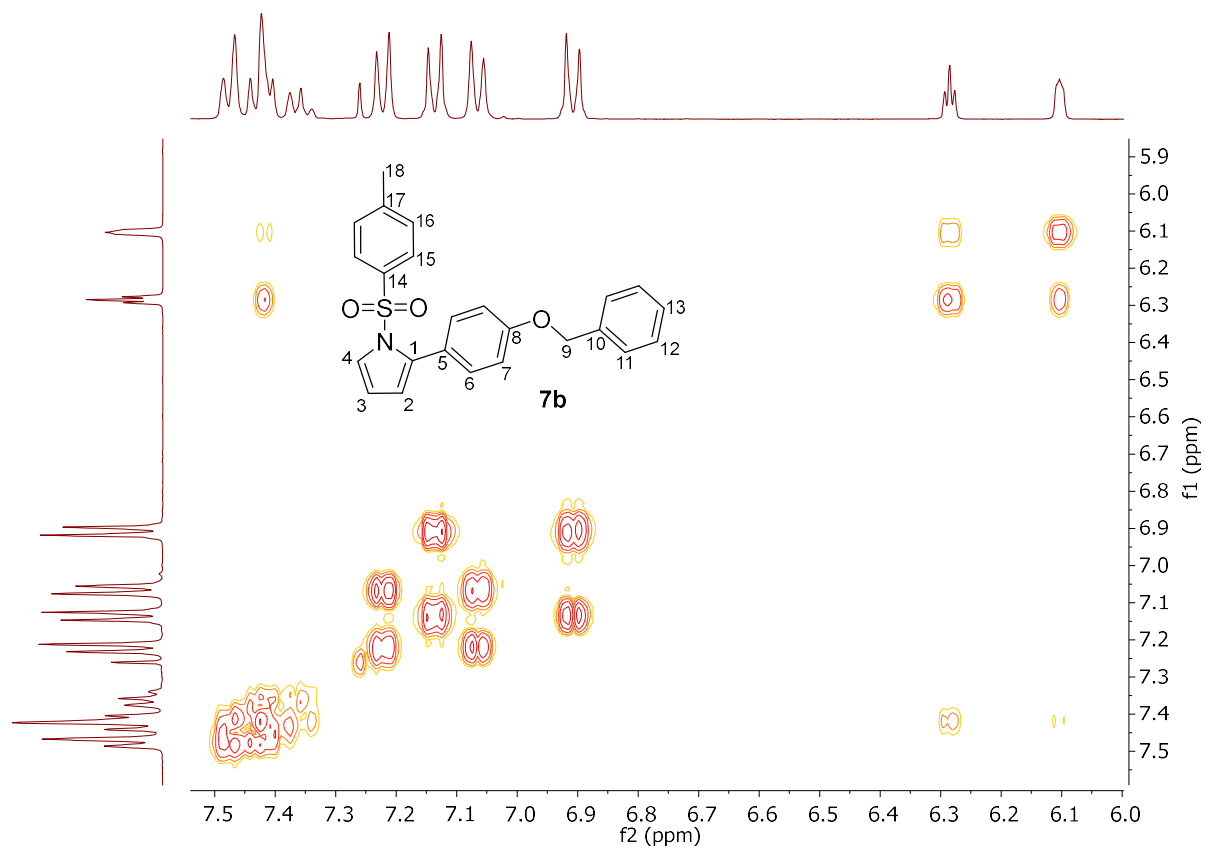

Figure S88: COSY NMR spectrum of 2-(4-(benzyloxy)phenyl)-1-(p-toluenesulfonyl)-1H-pyrrole **7b** in CDCl<sub>3</sub>.

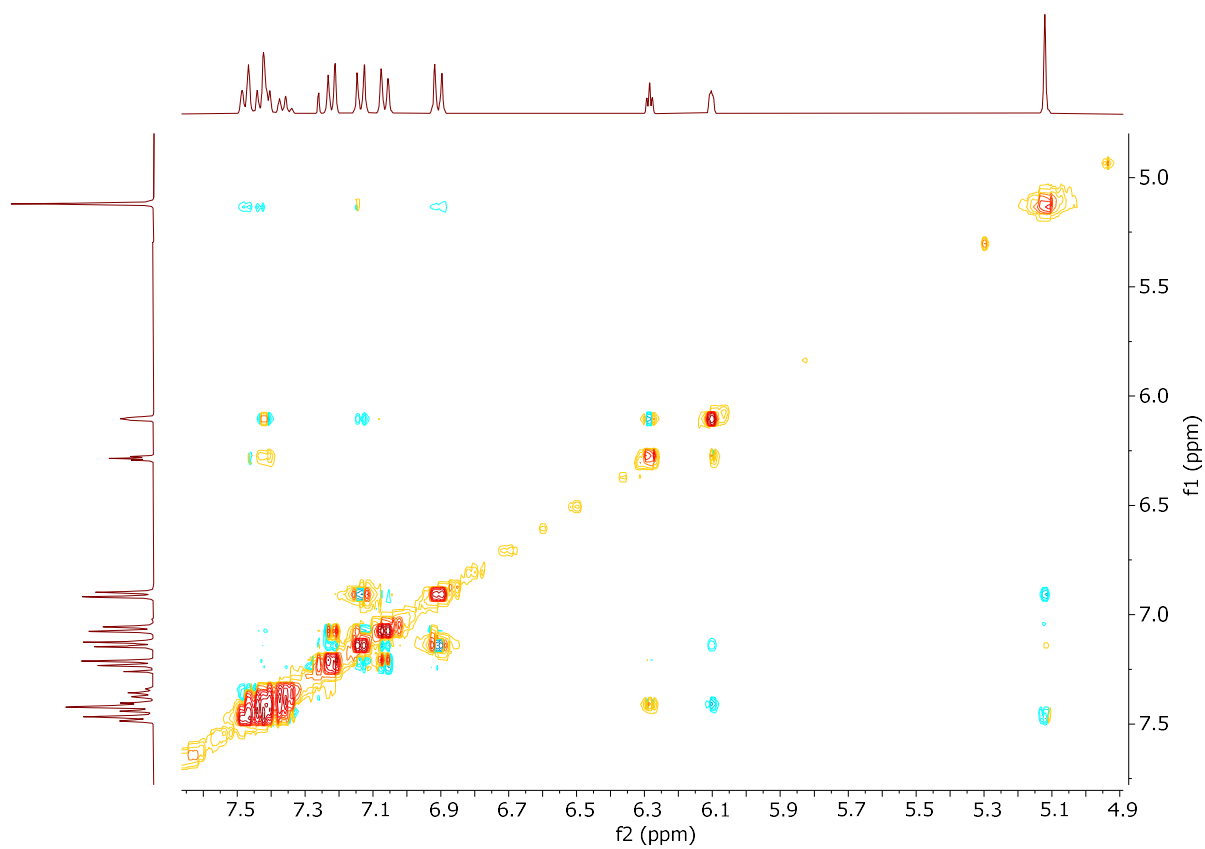

Figure S89: NOESY NMR spectrum of 2-(4-(benzyloxy)phenyl)-1-(p-toluenesulfonyl)-1H-pyrrole **7b** in CDCl<sub>3</sub>.

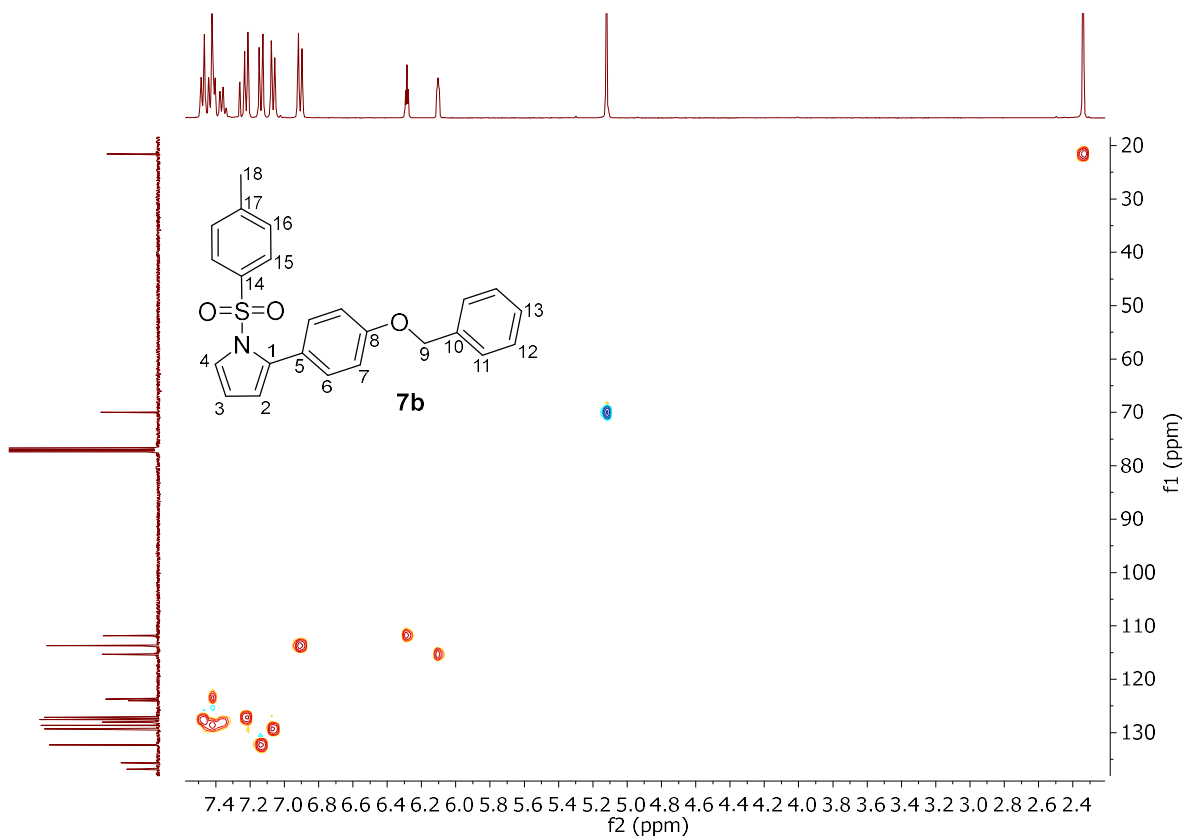

Figure S90: HSQC NMR spectrum of 2-(4-(benzyloxy)phenyl)-1-(p-toluenesulfonyl)-1H-pyrrole **7b** in  $CDCl_3$ .

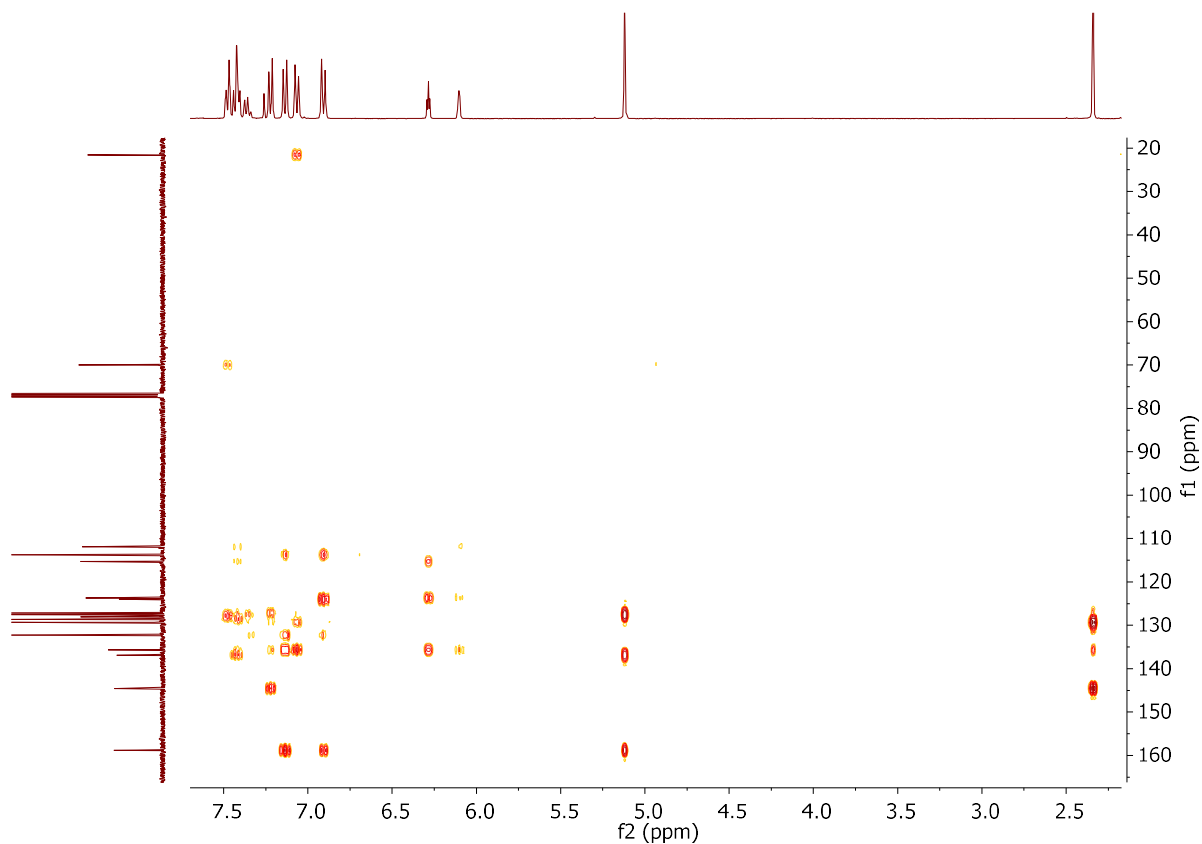

Figure S91: HMBC NMR spectrum of 2-(4-(benzyloxy)phenyl)-1-(p-toluenesulfonyl)-1H-pyrrole **7b** in  $CDCl_3$ .

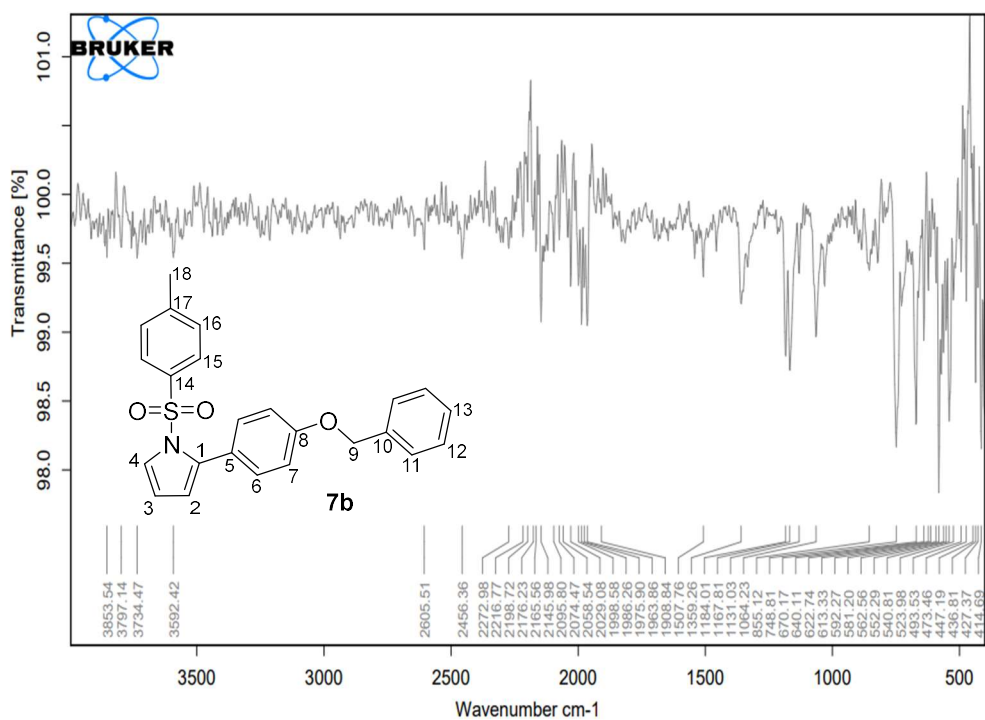

Figure S92: IR spectrum of 2-(4-(benzyloxy)phenyl)-1-(p-toluenesulfonyl)-1H-pyrrole **7b**.



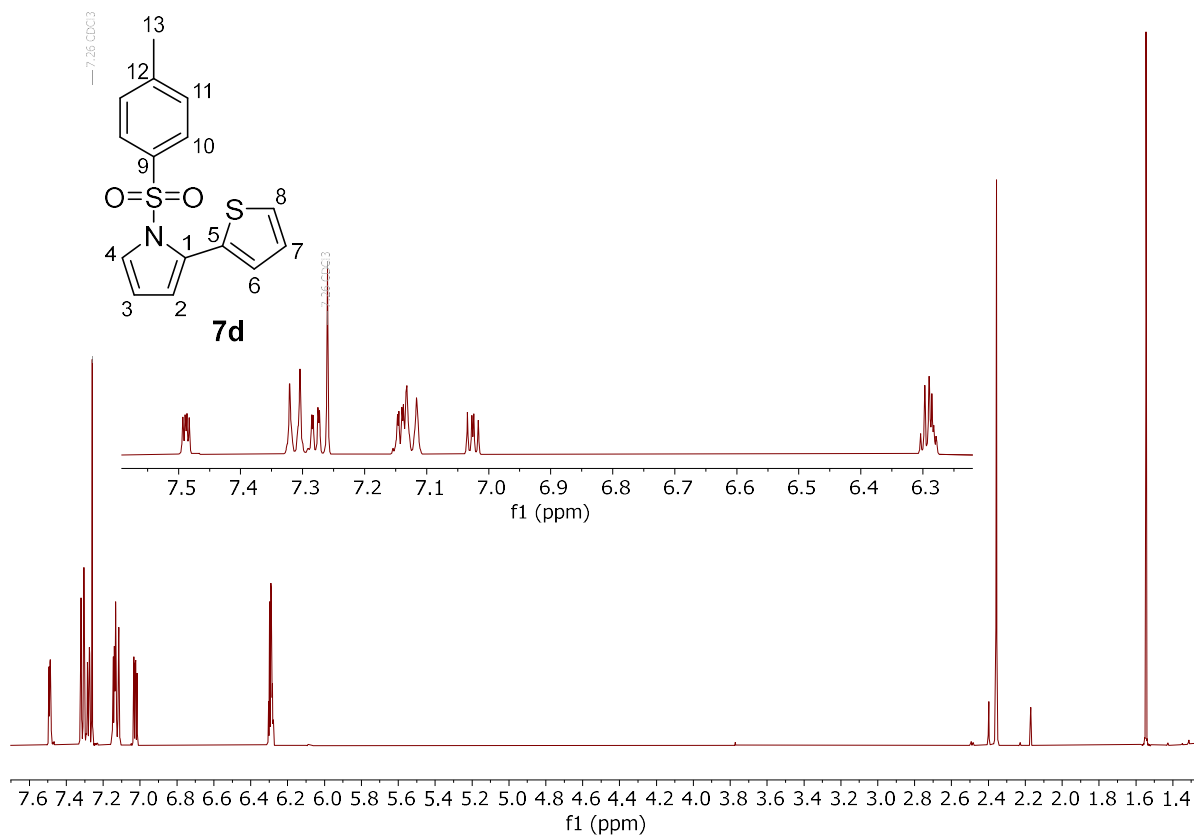

Figure S93: <sup>1</sup>H NMR spectrum of 2-(thiophen-2-yl)-1-(p-toluenesulfonyl)-1H-pyrrole **7d** in CDCl<sub>3</sub>

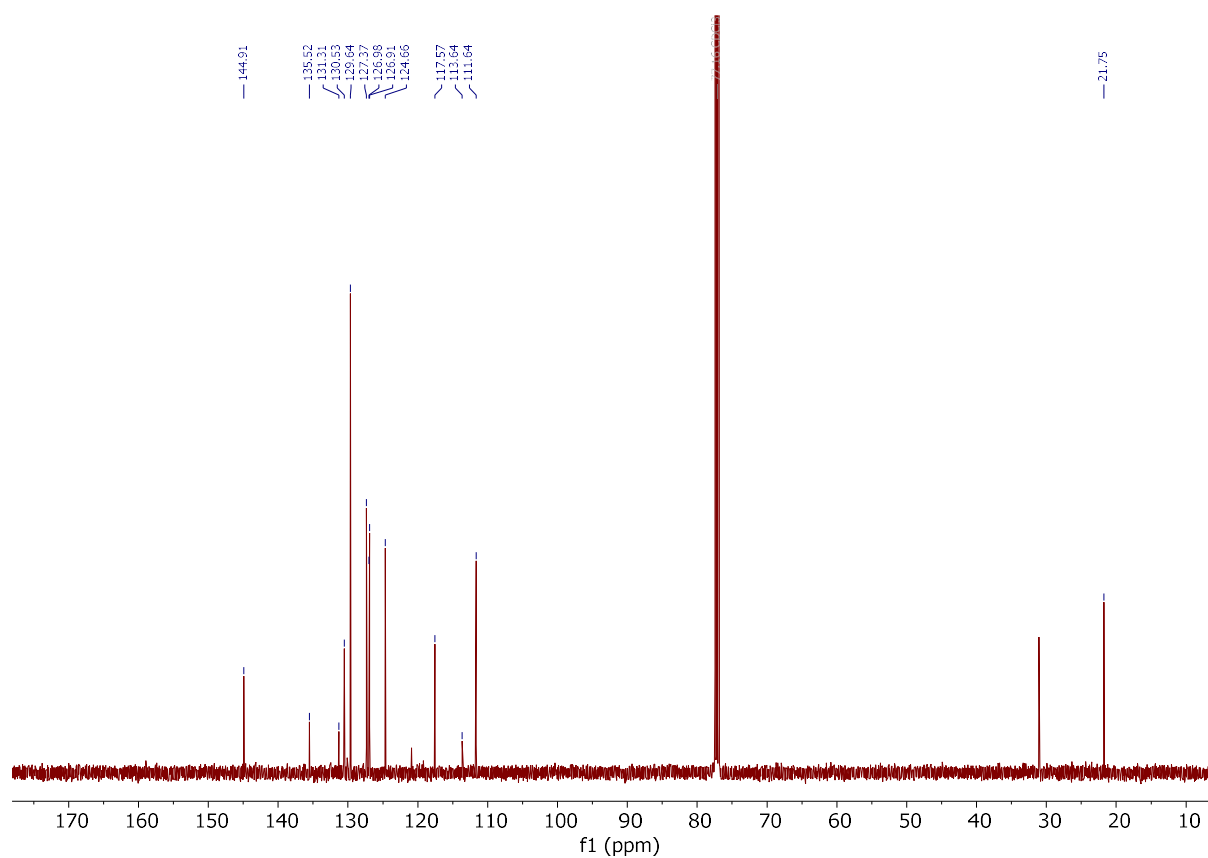

Figure S94: <sup>13</sup>C NMR spectrum of NMR spectrum of 2-(thiophen-2-yl)-1-(p-toluenesulfonyl)-1H-pyrrole **7d** in CDCl<sub>3</sub>

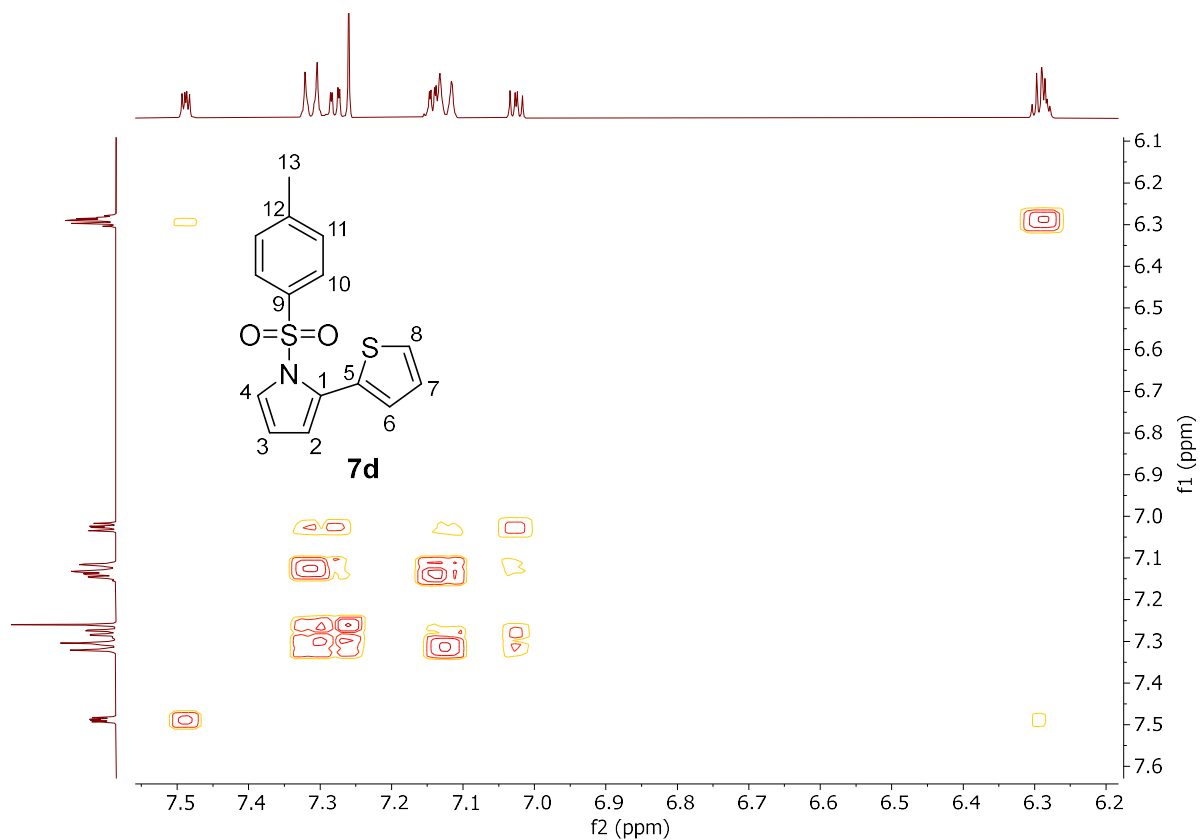

Figure S95: COSY NMR spectrum of 2-(thiophen-2-yl)-1-(p-toluenesulfonyl)-1H-pyrrole **7d** in CDCl<sub>3</sub>

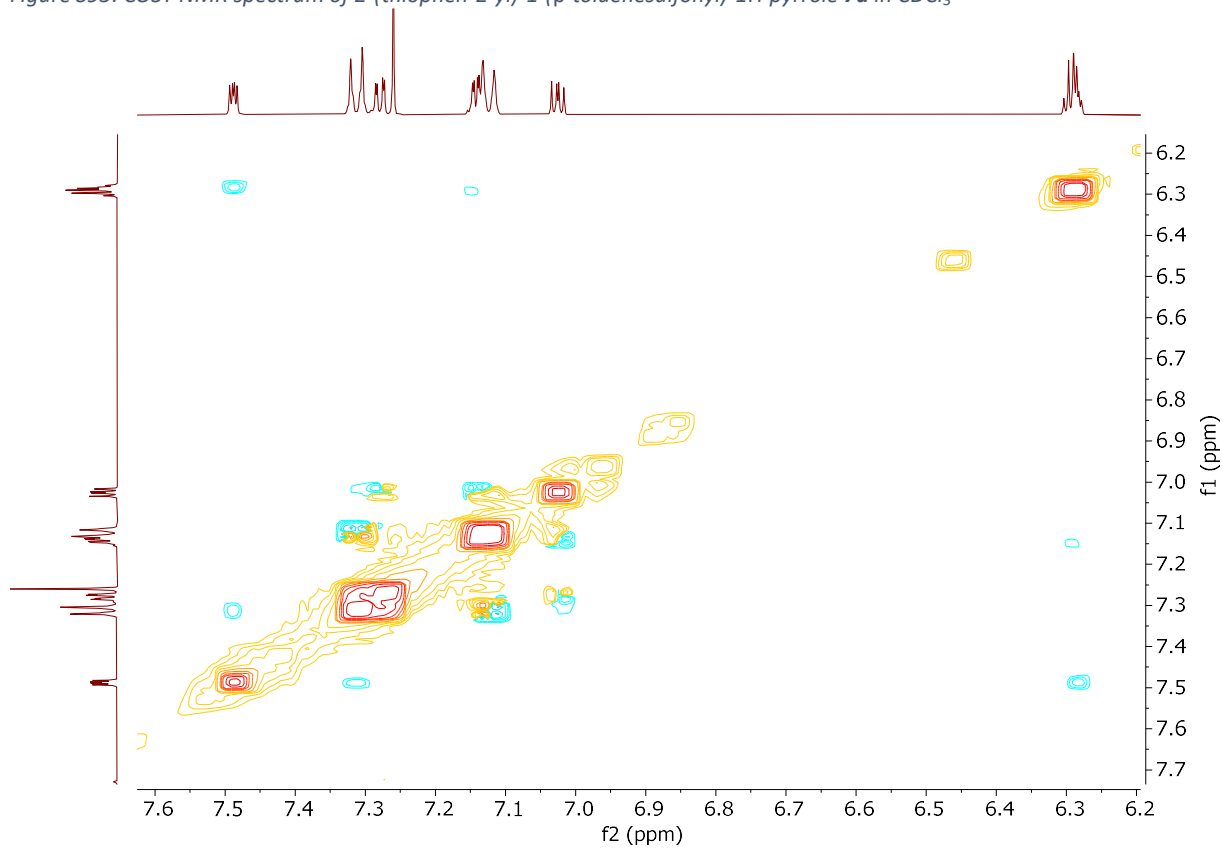

Figure S96: NOESY NMR spectrum of 2-(thiophen-2-yl)-1-(p-toluenesulfonyl)-1H-pyrrole **7d** in CDCl<sub>3</sub>

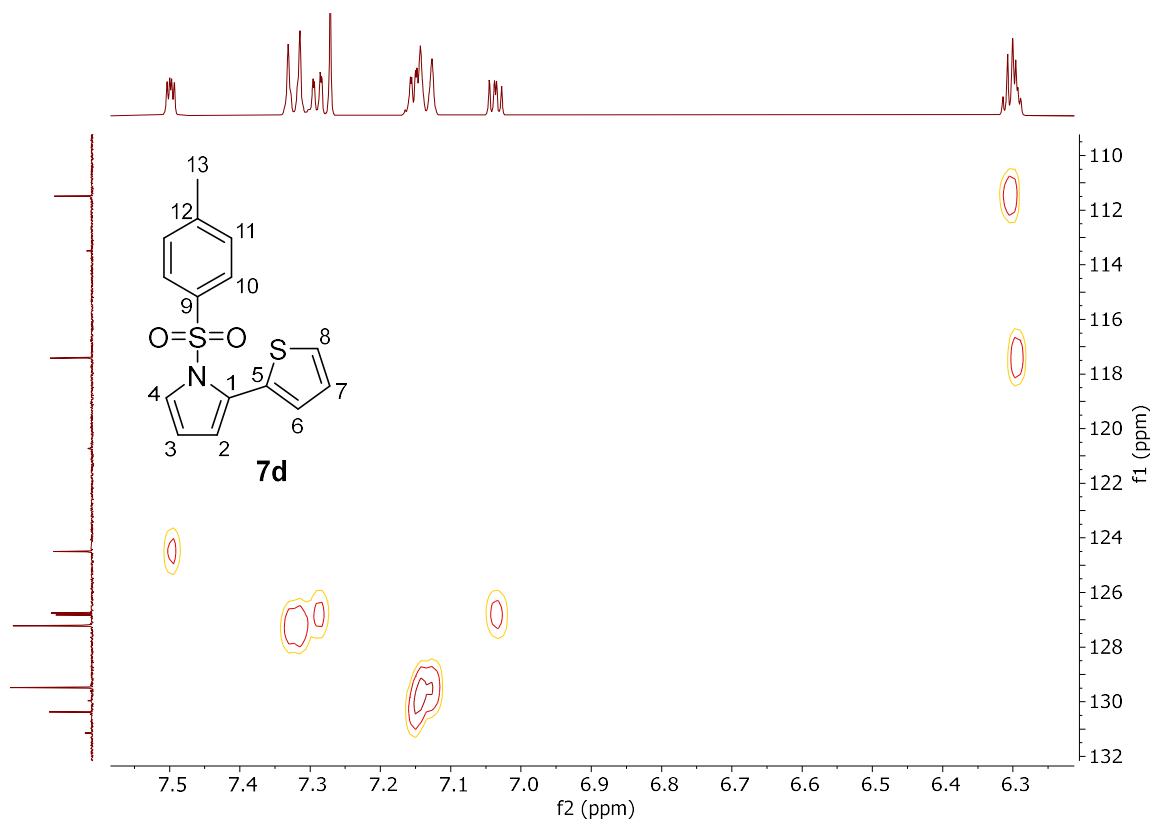

Figure S97: HSQC NMR spectrum of 2-(thiophen-2-yl)-1-(p-toluenesulfonyl)-1H-pyrrole **7d** in CDCl<sub>3</sub>

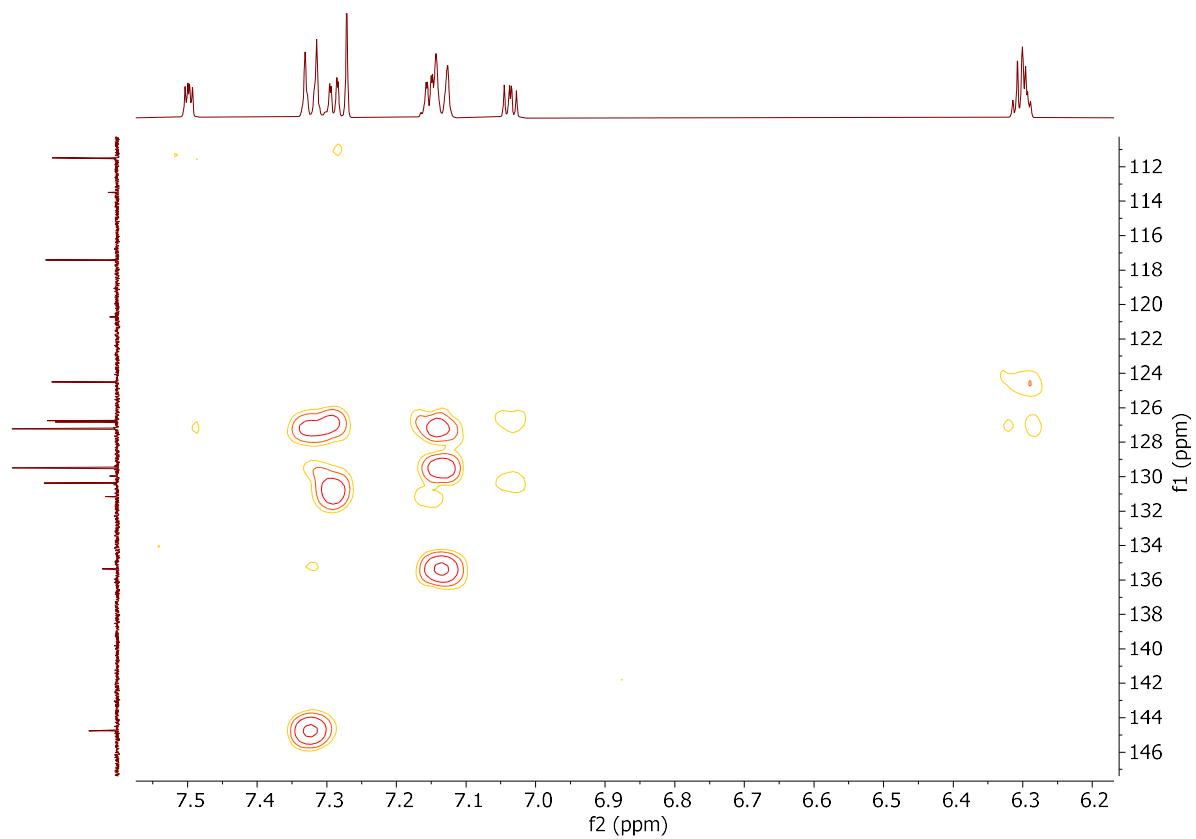

Figure S98: HMBC NMR spectrum of 2-(thiophen-2-yl)-1-(p-toluenesulfonyl)-1H-pyrrole **7d** in CDCl<sub>3</sub>

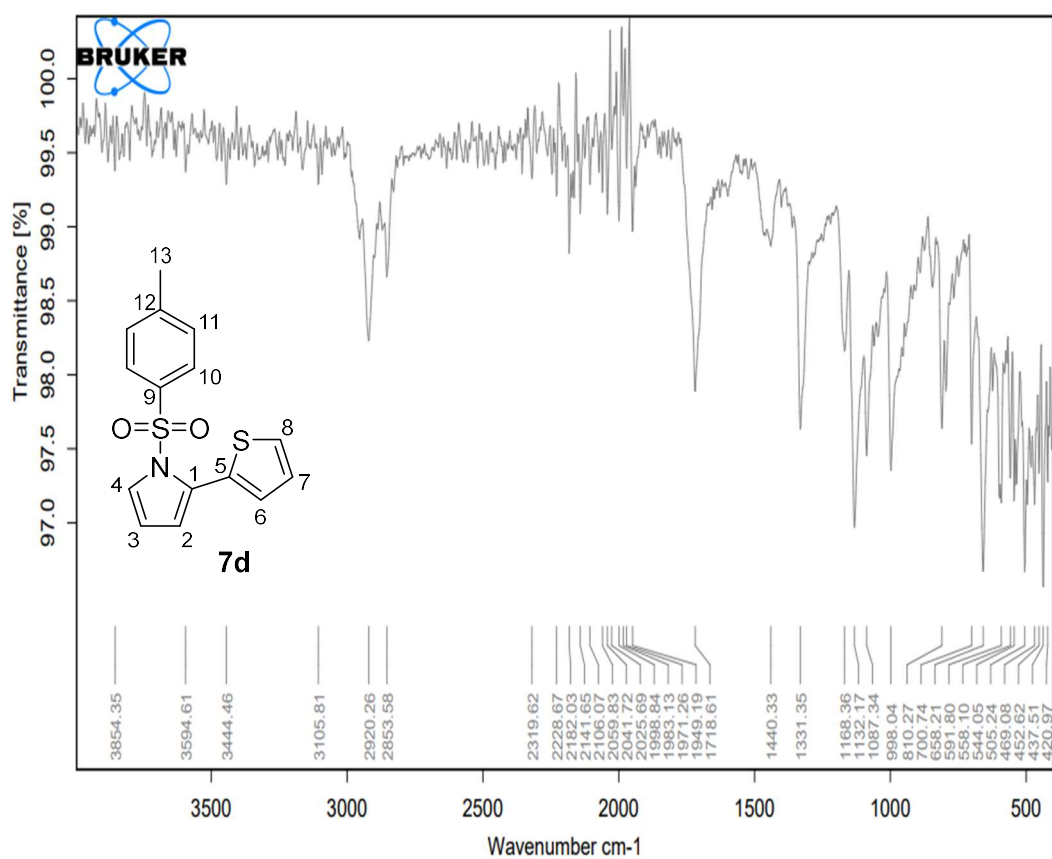

Figure S99: IR NMR spectrum of 2-(thiophen-2-yl)-1-(p-toluenesulfonyl)-1H-pyrrole **7d**

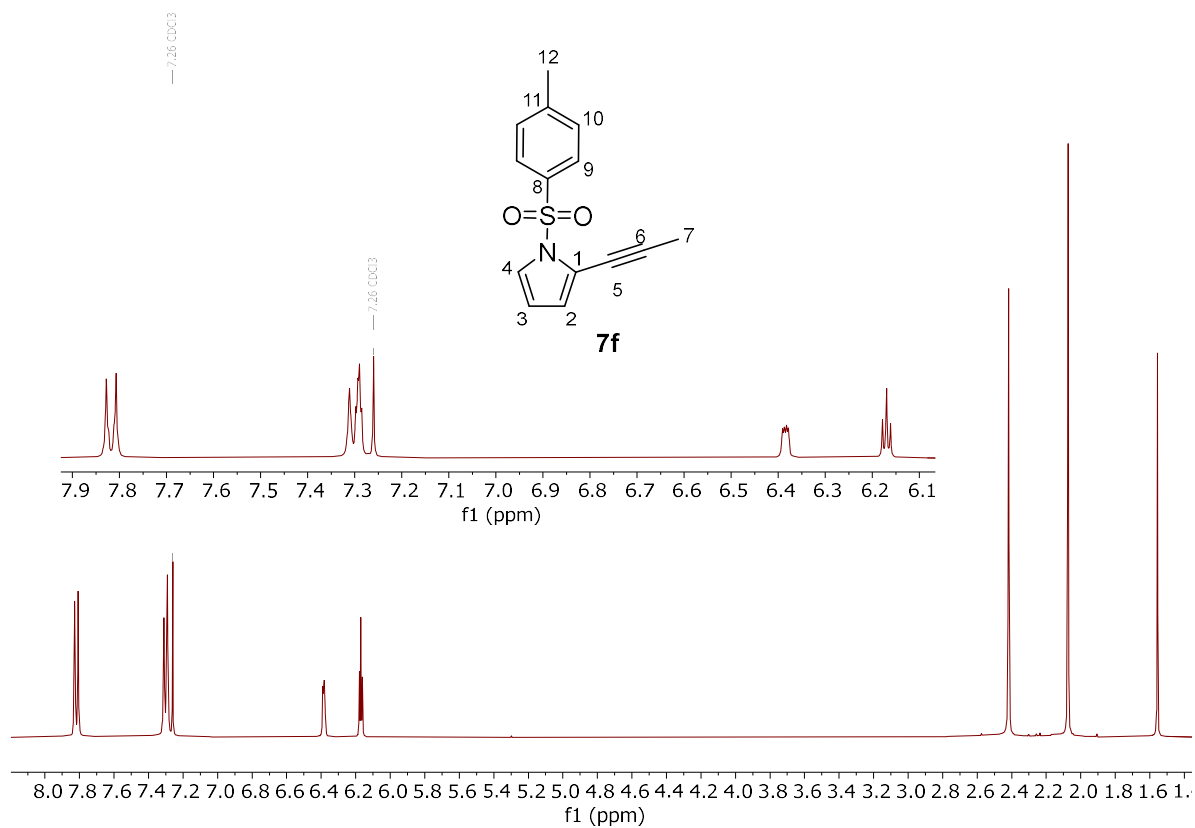

Figure S100: <sup>1</sup>H NMR spectrum of 2-(prop-1-yn-1-yl)-1-(p-toluenesulfonyl)-1H-pyrrole **7f** in CDCl<sub>3</sub>

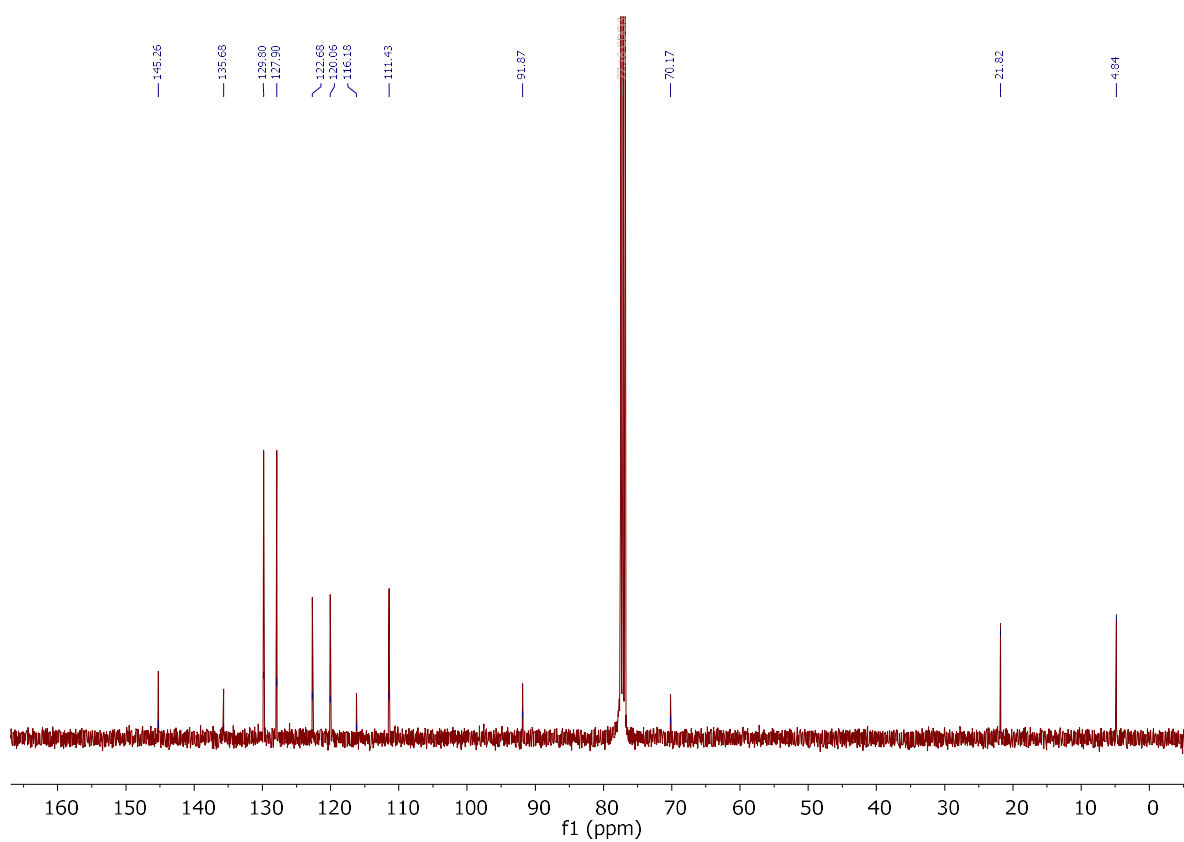

Figure S101: <sup>13</sup>C NMR spectrum of 2-(prop-1-yn-1-yl)-1-(p-toluenesulfonyl)-1H-pyrrole **7f** in CDCl<sub>3</sub>

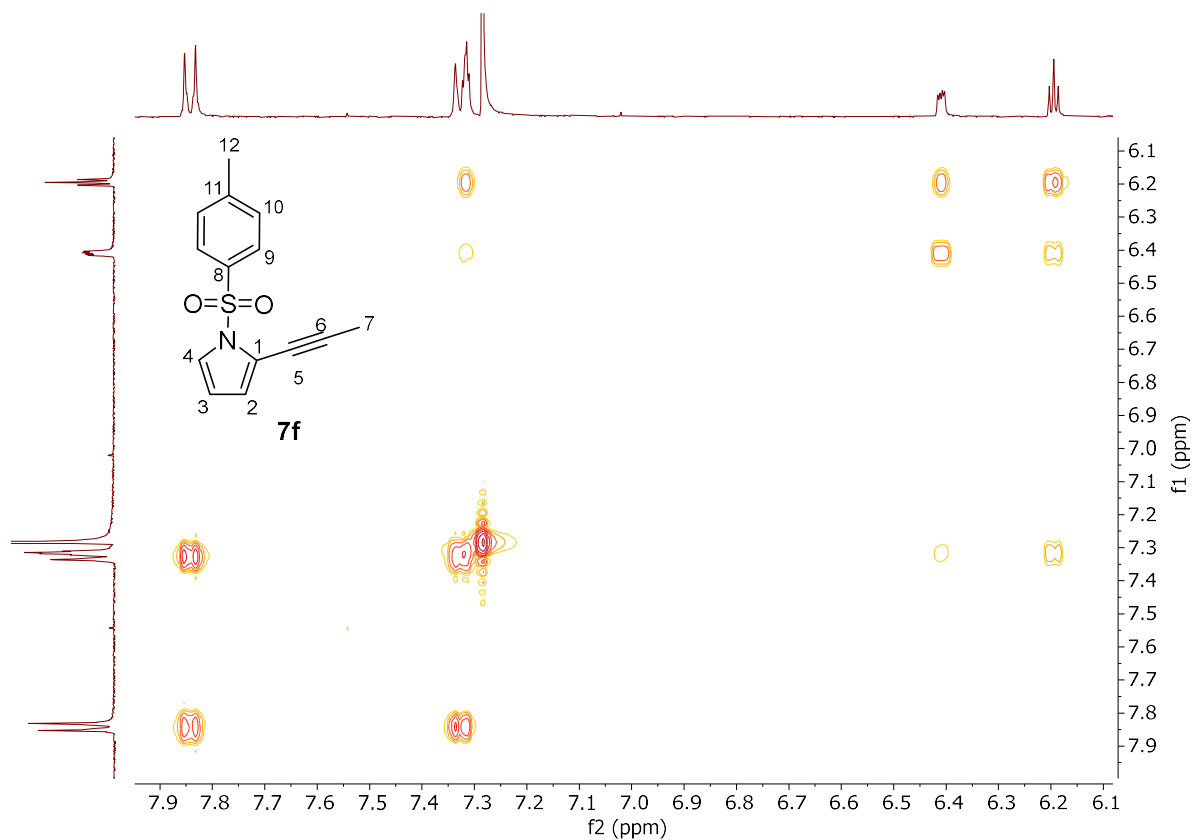

Figure S102: COSY NMR spectrum of 2-(prop-1-yn-1-yl)-1-(p-toluenesulfonyl)-1H-pyrrole **7f** in CDCl<sub>3</sub>

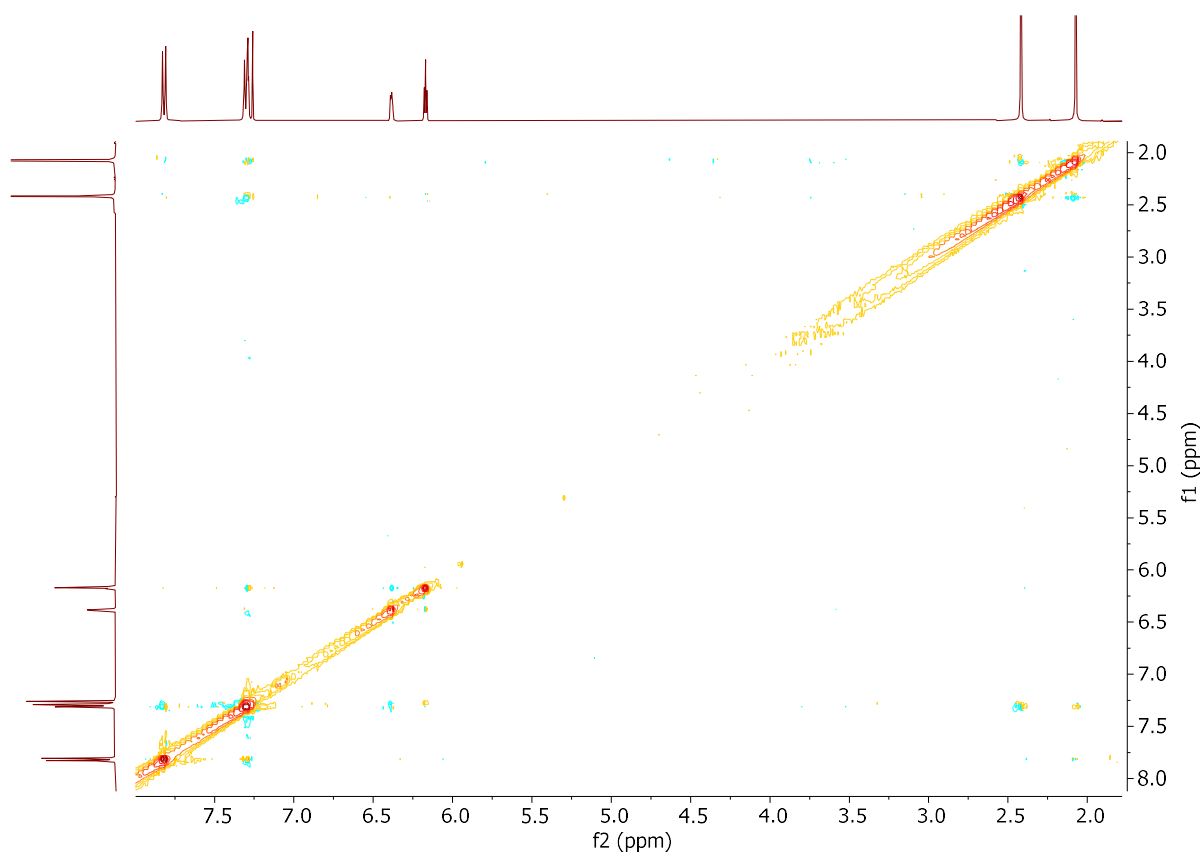

Figure S103: NOESY NMR spectrum of 2-(prop-1-yn-1-yl)-1-(p-toluenesulfonyl)-1H-pyrrole **7f** in CDCl<sub>3</sub>

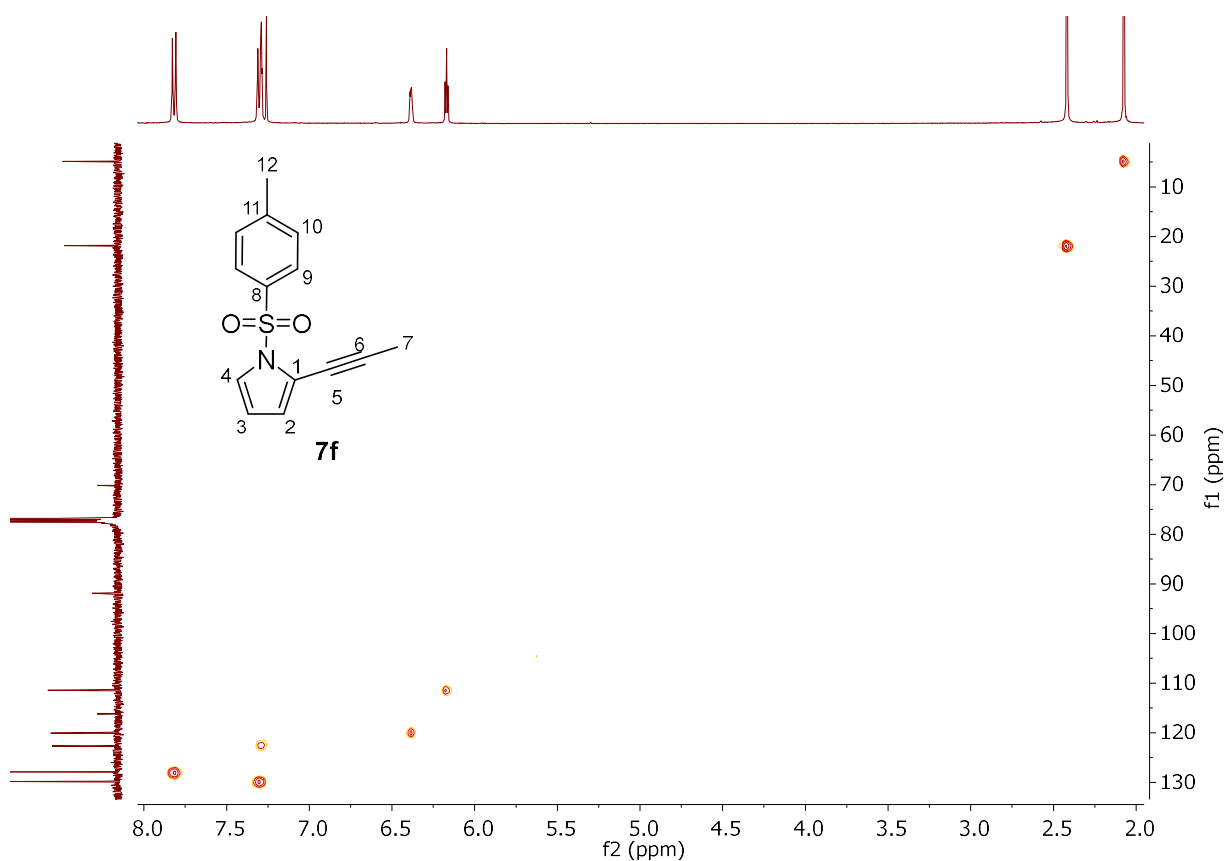

Figure S104: HSQC NMR spectrum of 2-(prop-1-yn-1-yl)-1-(p-toluenesulfonyl)-1H-pyrrole **7f** in CDCl<sub>3</sub>

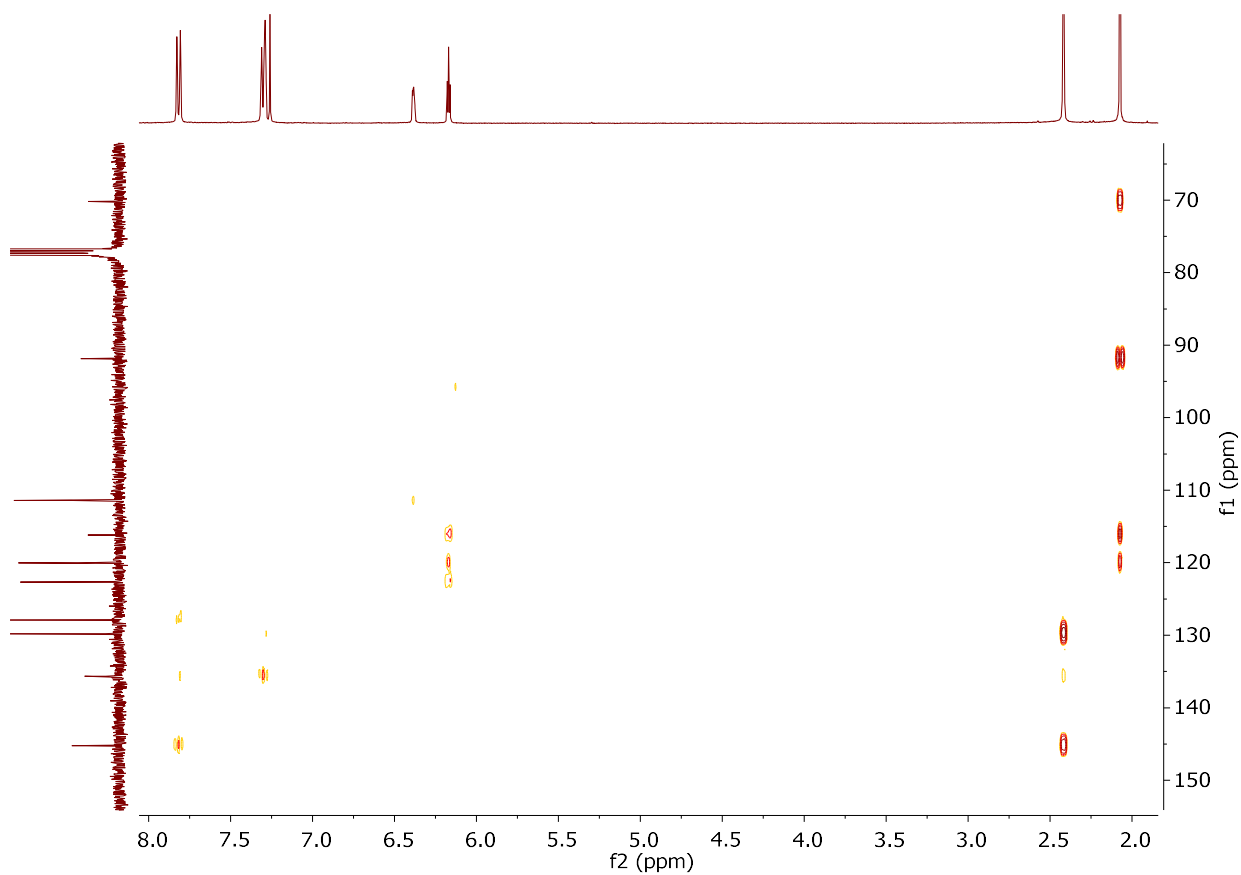

Figure S105: HMBC NMR spectrum of 2-(prop-1-yn-1-yl)-1-(p-toluenesulfonyl)-1H-pyrrole **7f** in CDCl<sub>3</sub>

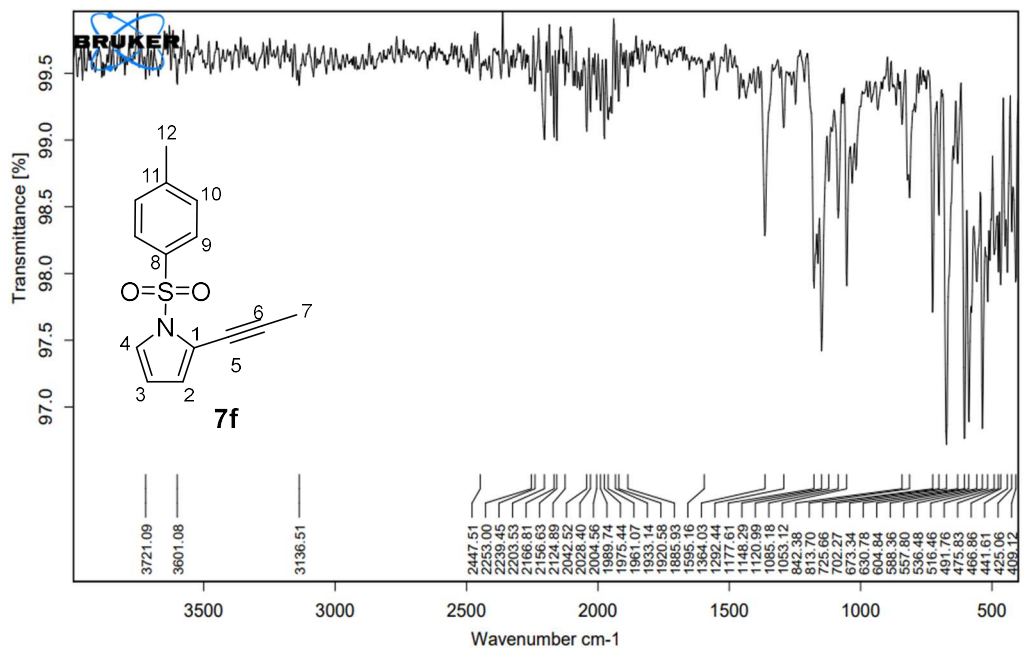

Figure S106: IR spectrum of 2-(prop-1-yn-1-yl)-1-(p-toluenesulfonyl)-1H-pyrrole **7f**



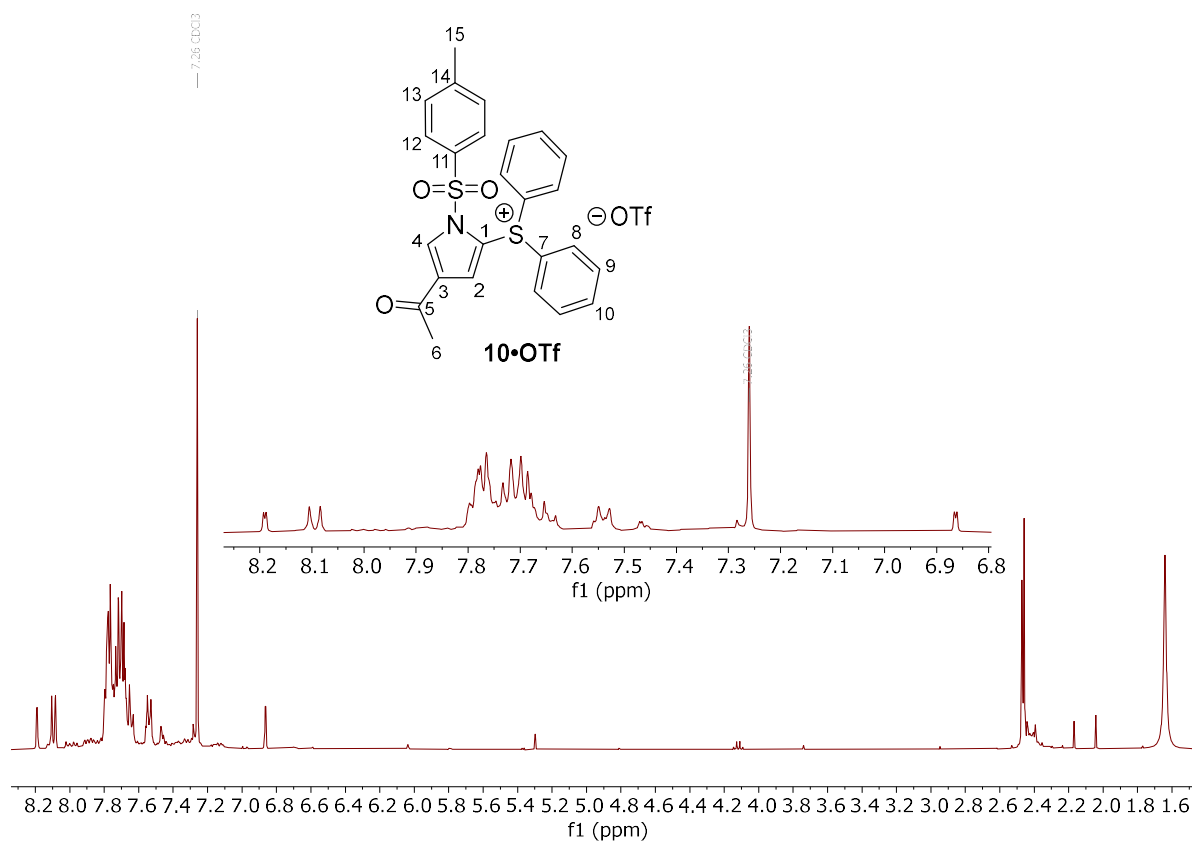

Figure S107:  $^1\text{H}$  NMR spectrum of (4-acetyl-1-(p-toluenesulfonyl)-1H-pyrrol-2-yl)diphenylsulfonium trifluoromethanesulfonate **10•OTf** in  $\text{CDCl}_3$

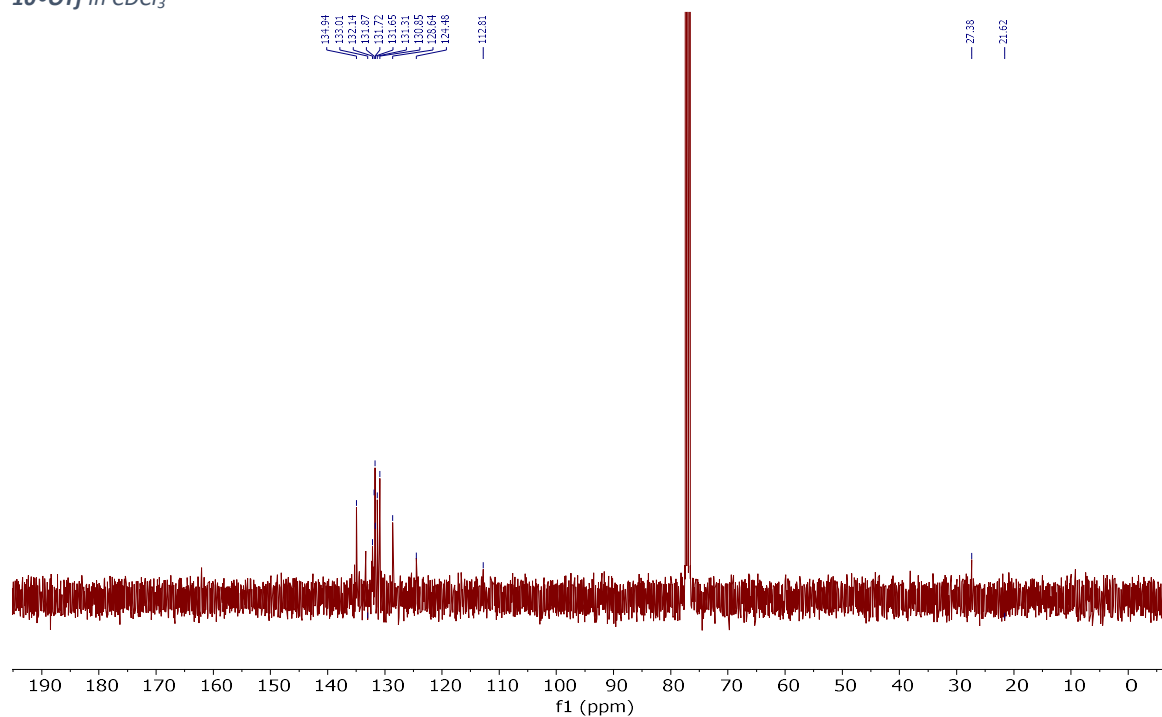

Figure S108:  $^{13}\text{C}$  NMR spectrum of (4-acetyl-1-(p-toluenesulfonyl)-1H-pyrrol-2-yl)diphenylsulfonium trifluoromethanesulfonate **10•OTf** in  $\text{CDCl}_3$

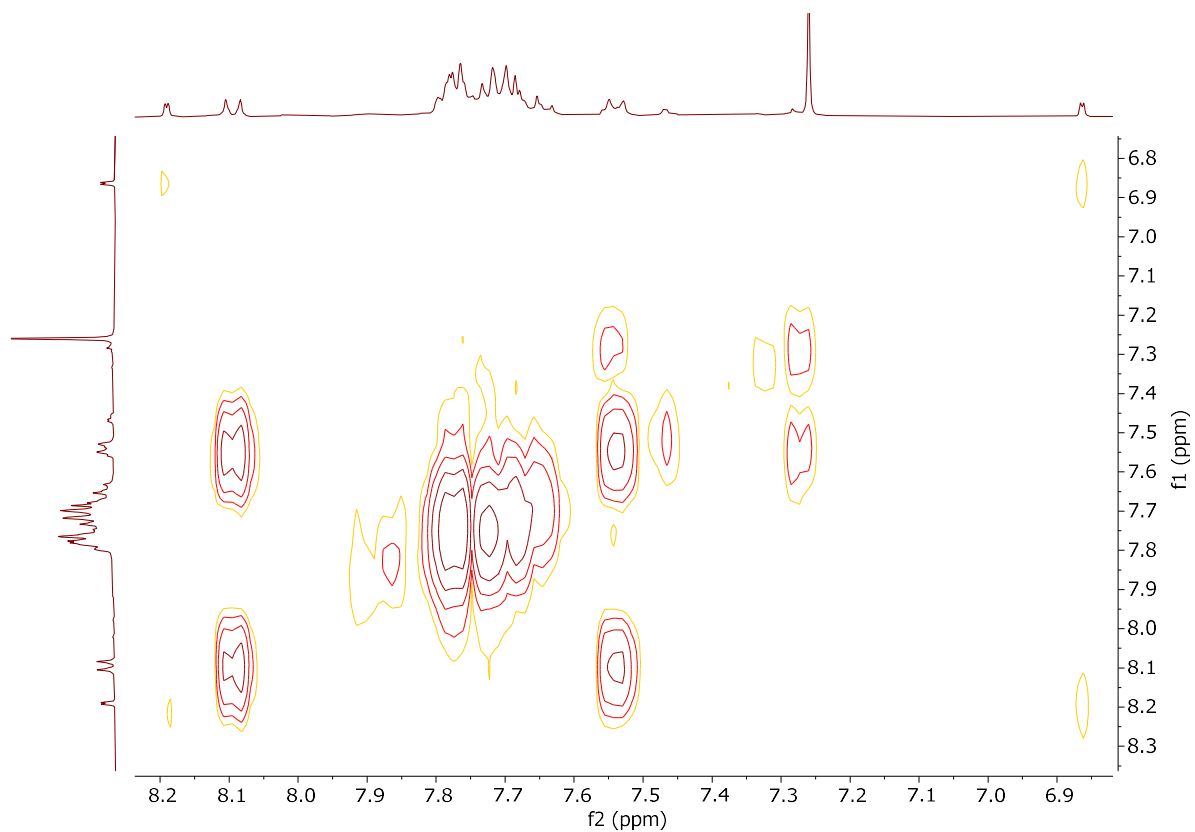

Figure S109: COSY NMR spectrum of (4-acetyl-1-(p-toluenesulfonyl)-1H-pyrrol-2-yl)diphenylsulfonium trifluoromethanesulfonate **10•OTf** in  $\text{CDCl}_3$

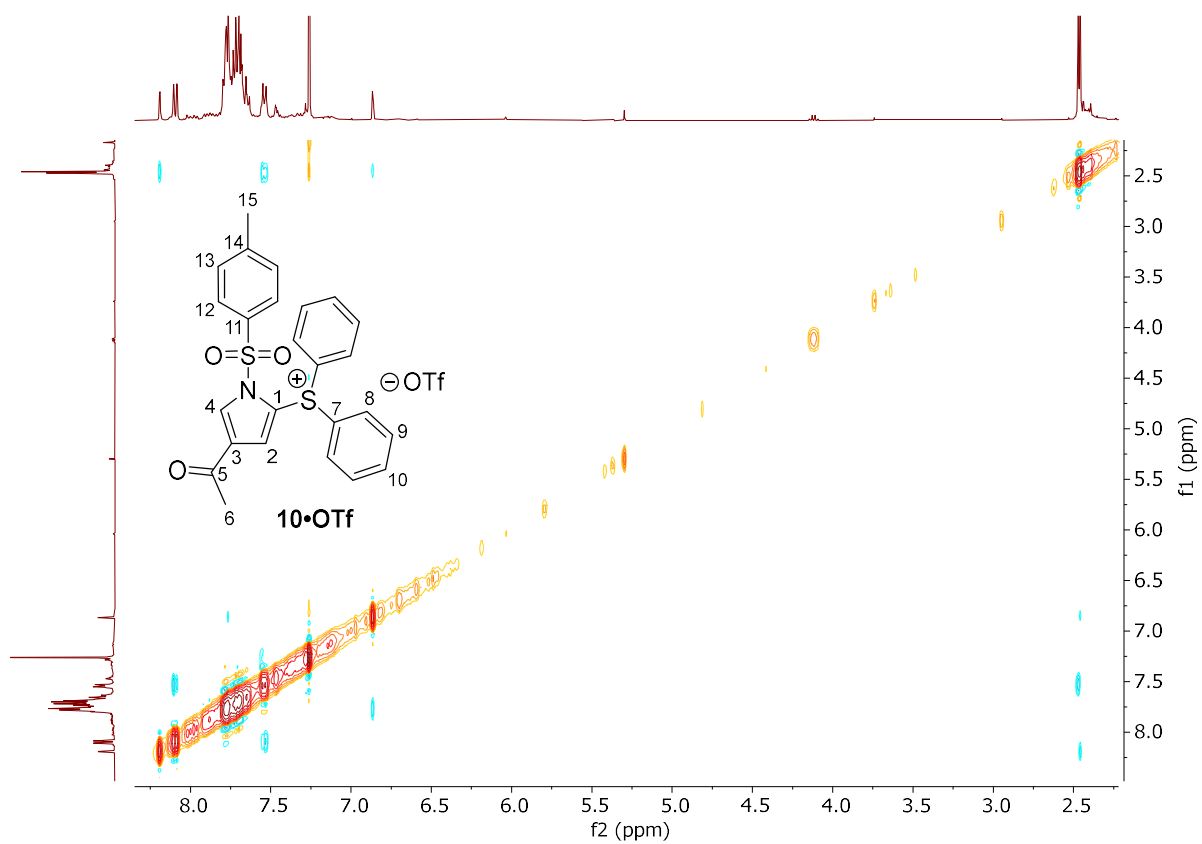

Figure S110: NOESY NMR spectrum of (4-acetyl-1-(p-toluenesulfonyl)-1H-pyrrol-2-yl)diphenylsulfonium trifluoromethanesulfonate **10•OTf** in  $\text{CDCl}_3$

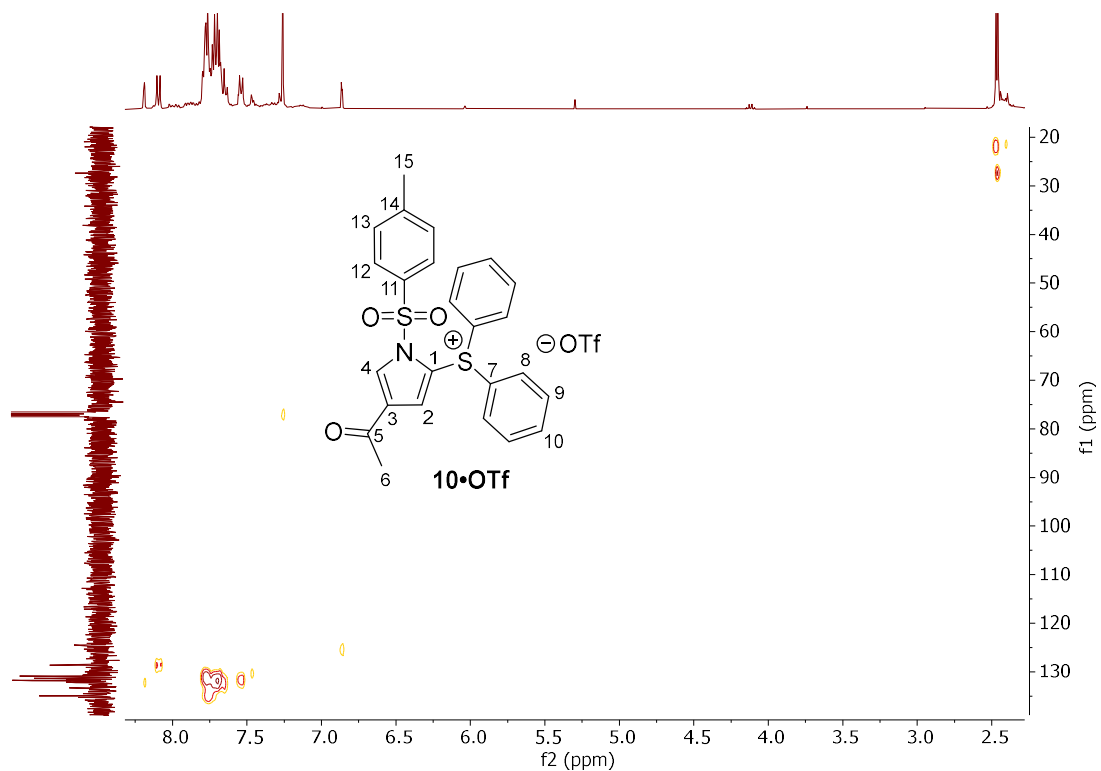

Figure S111: HSQC NMR spectrum of (4-acetyl-1-(p-toluenesulfonyl)-1H-pyrrol-2-yl)diphenylsulfonium trifluoromethanesulfonate **10•OTf** in  $CDCl_3$

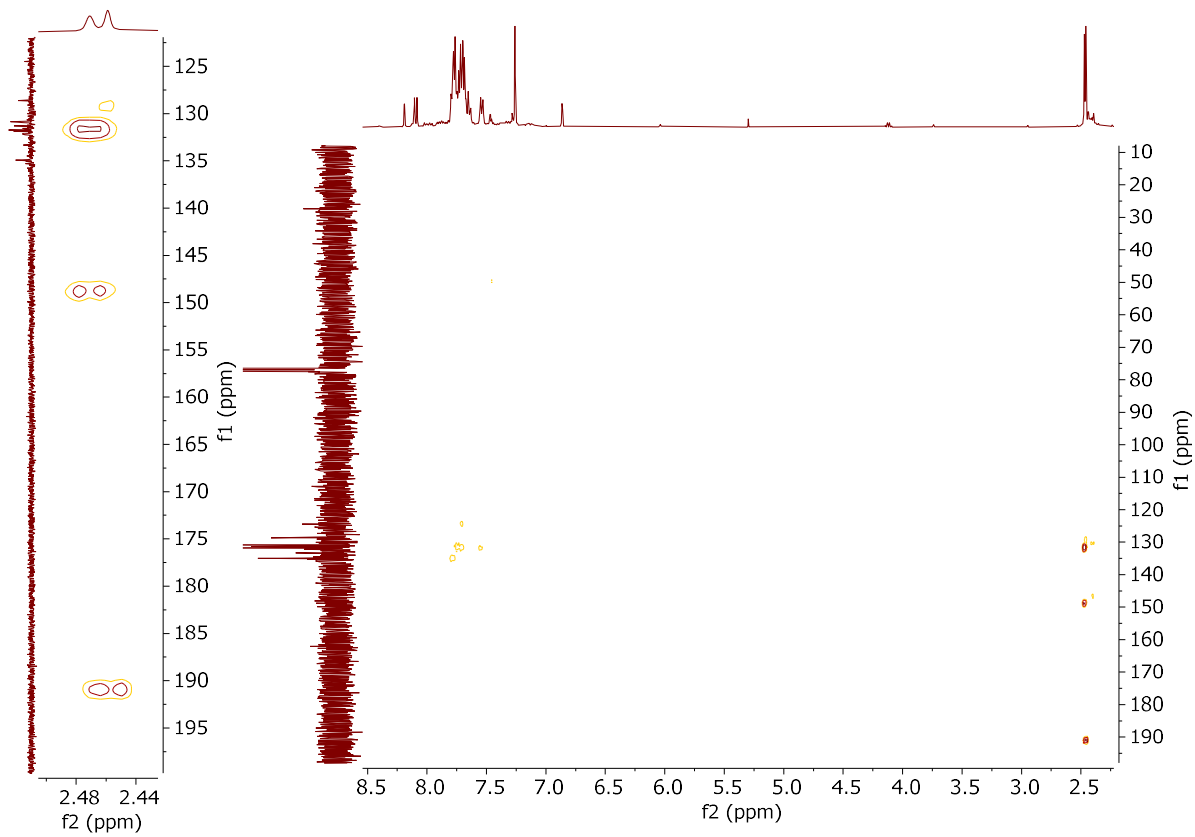

Figure S112: HMBC NMR spectrum of (4-acetyl-1-(p-toluenesulfonyl)-1H-pyrrol-2-yl)diphenylsulfonium trifluoromethanesulfonate **10•OTf** in  $CDCl_3$

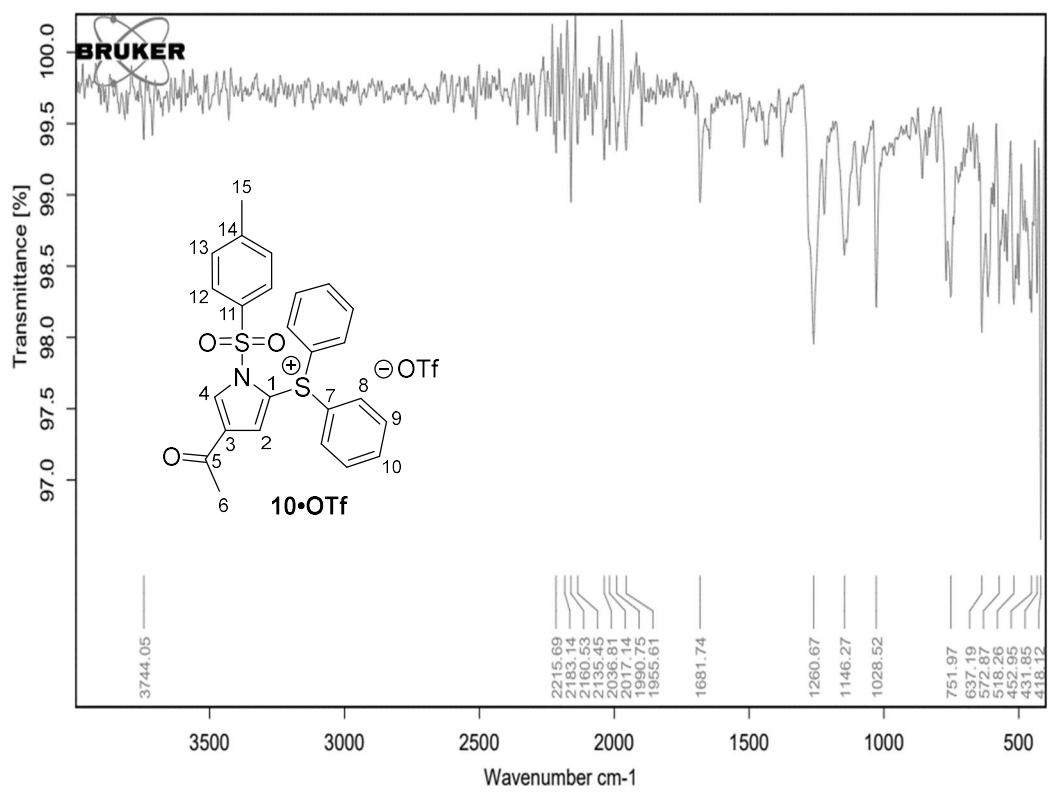

Figure S113: IR spectrum of (4-acetyl-1-(p-toluenesulfonyl)-1H-pyrrol-2-yl)diphenylsulfonium trifluoromethanesulfonate **10•OTf**

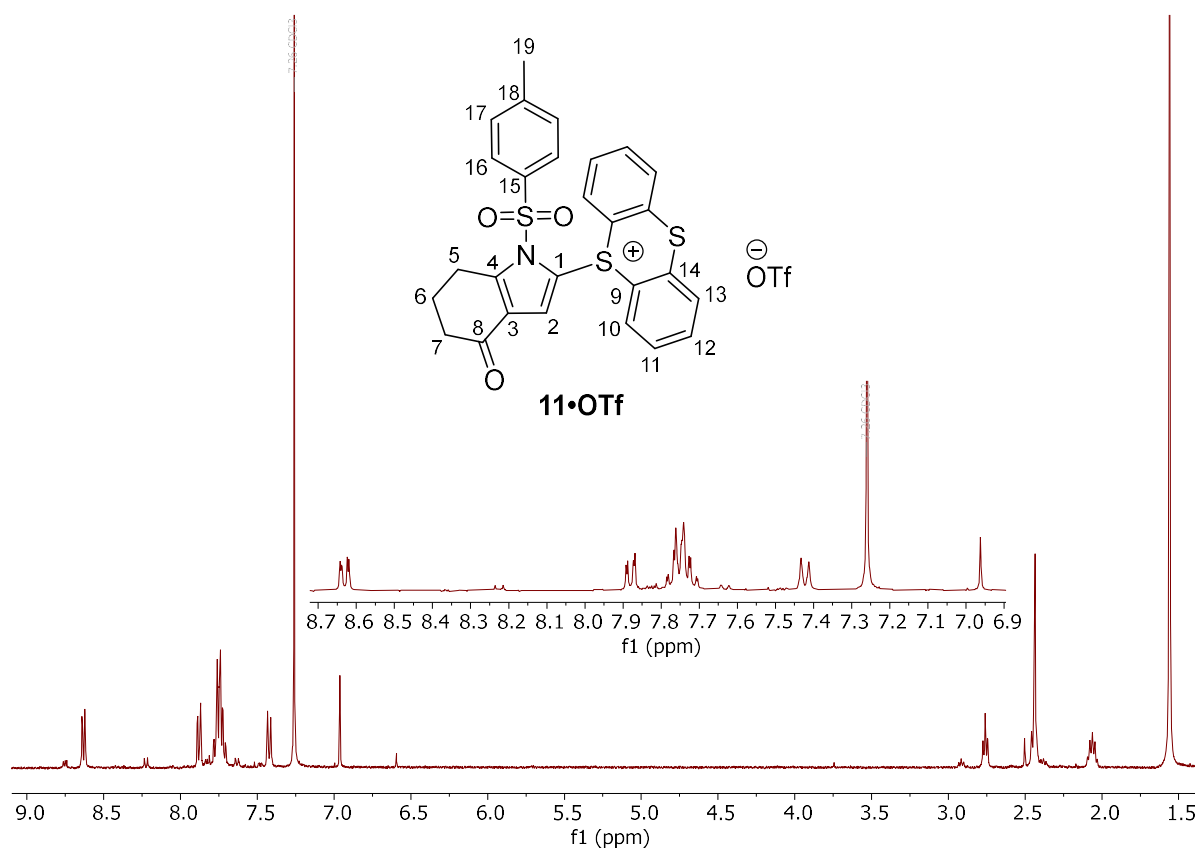

Figure S114: <sup>1</sup>H NMR spectrum of 5-(4-oxo-1-(p-toluenesulfonyl)-4,5,6,7-tetrahydro-1H-indol-2-yl)-5H-thianthren-5-ium trifluoromethanesulfonate **11•OTf** in CDCl<sub>3</sub>

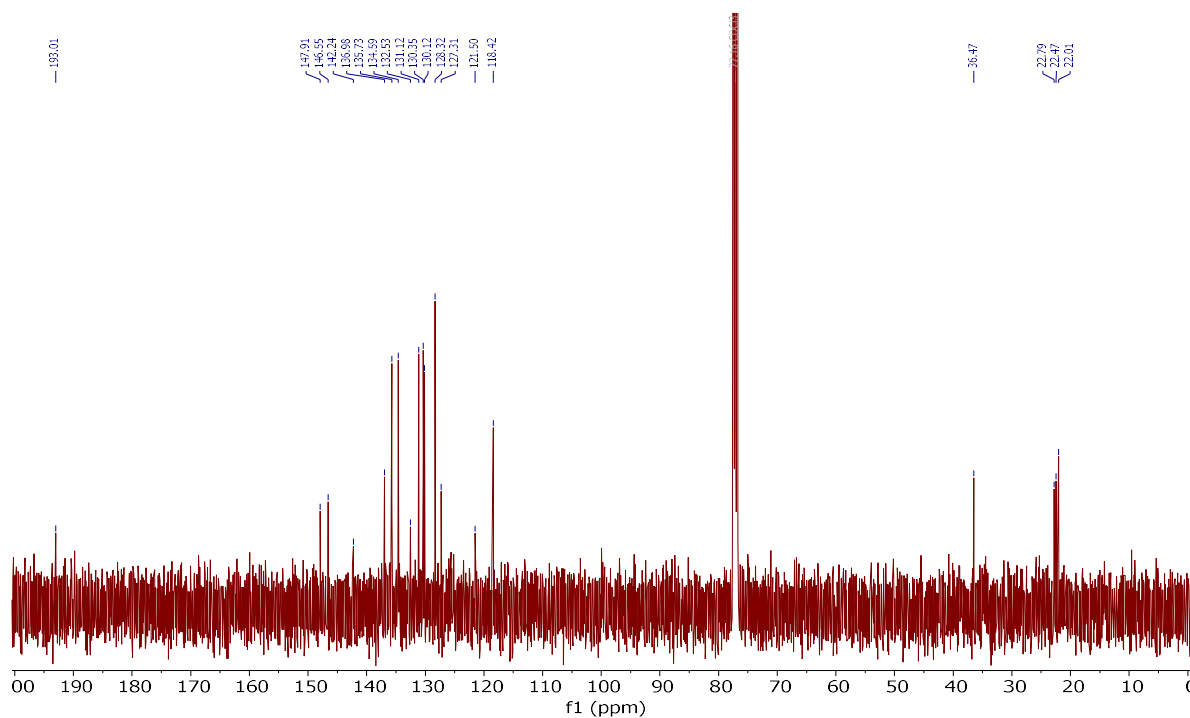

Figure S115: <sup>13</sup>C NMR spectrum of 5-(4-oxo-1-(p-toluenesulfonyl)-4,5,6,7-tetrahydro-1H-indol-2-yl)-5H-thianthren-5-ium trifluoromethanesulfonate **11•OTf** in CDCl<sub>3</sub>

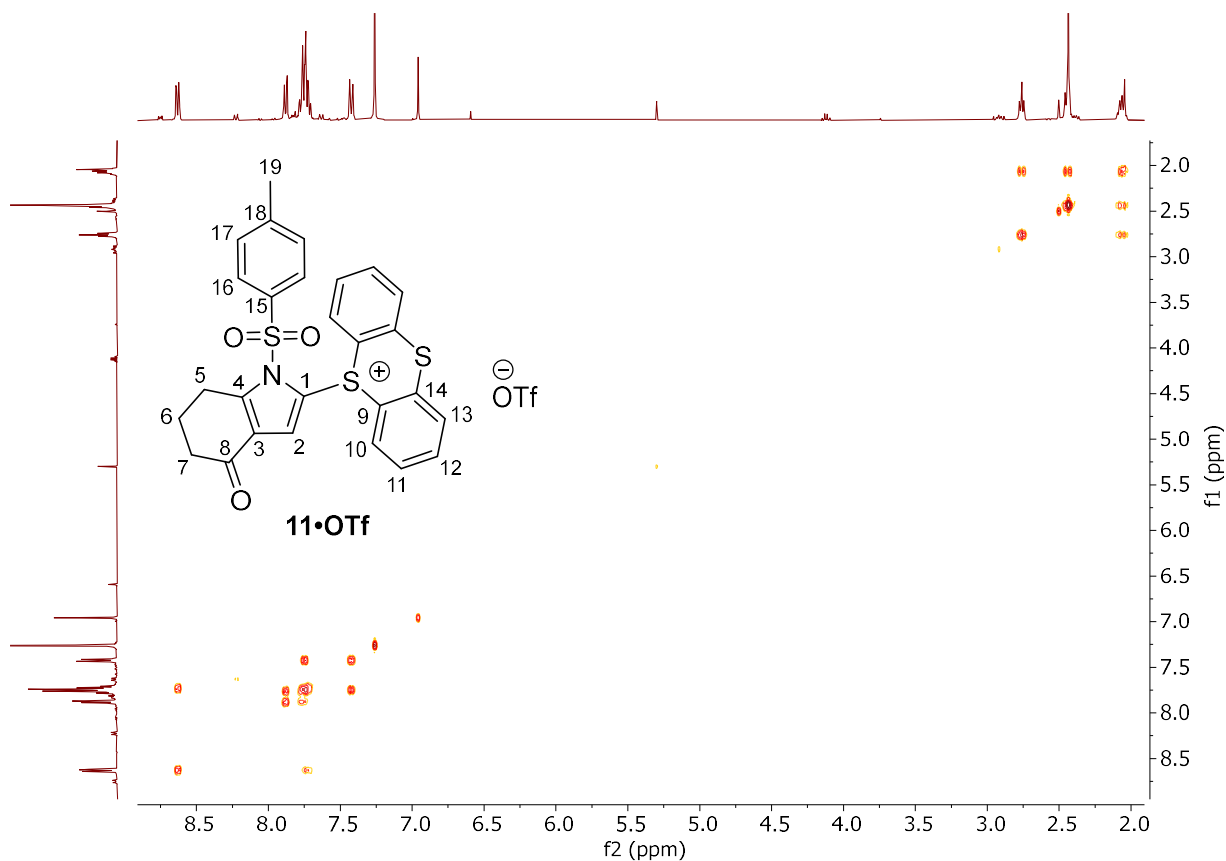

Figure S116: COSY NMR spectrum of 5-(4-oxo-1-(p-toluenesulfonyl)-4,5,6,7-tetrahydro-1H-indol-2-yl)-5H-thianthren-5-ium trifluoromethanesulfonate **11•OTf** in  $\text{CDCl}_3$

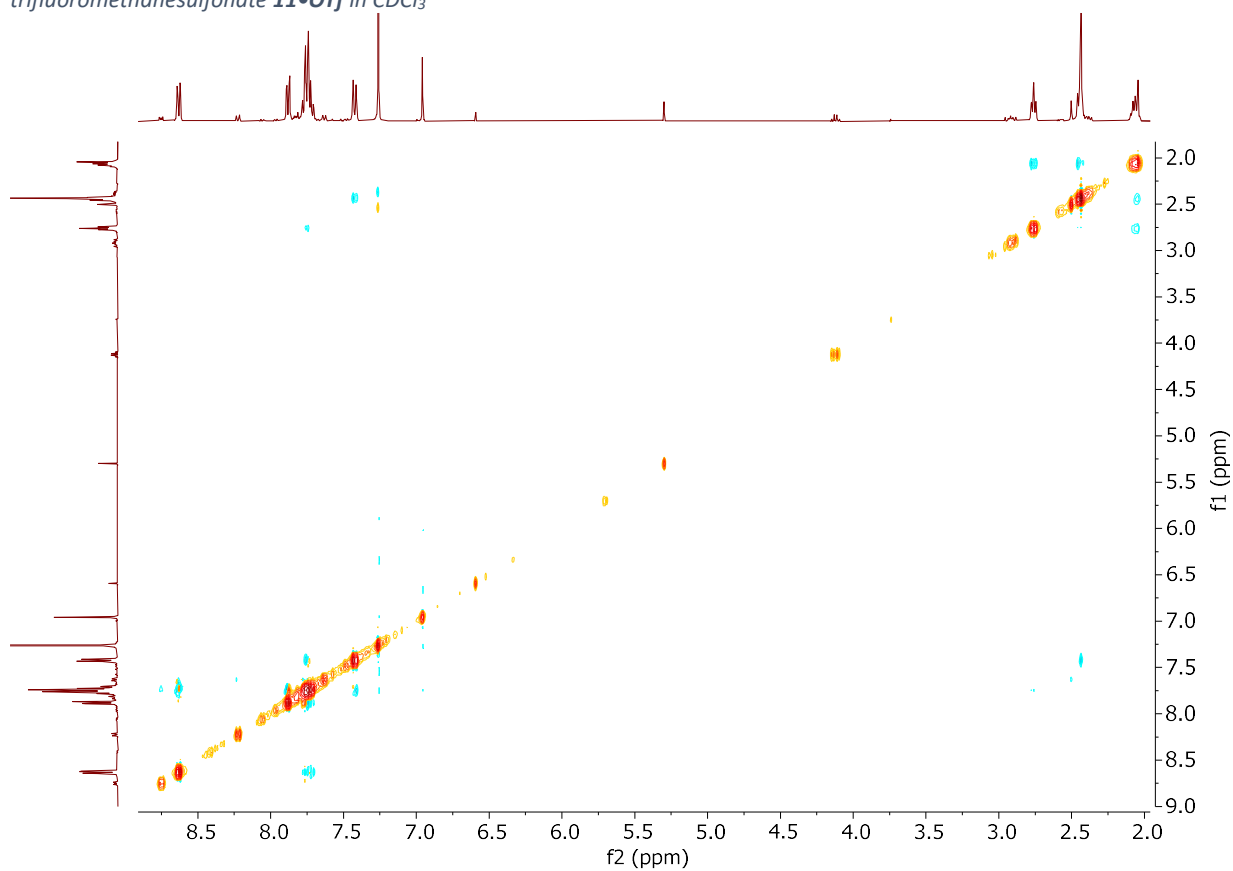

Figure S117: NOESY NMR spectrum of 5-(4-oxo-1-(p-toluenesulfonyl)-4,5,6,7-tetrahydro-1H-indol-2-yl)-5H-thianthren-5-ium trifluoromethanesulfonate **11•OTf** in  $\text{CDCl}_3$

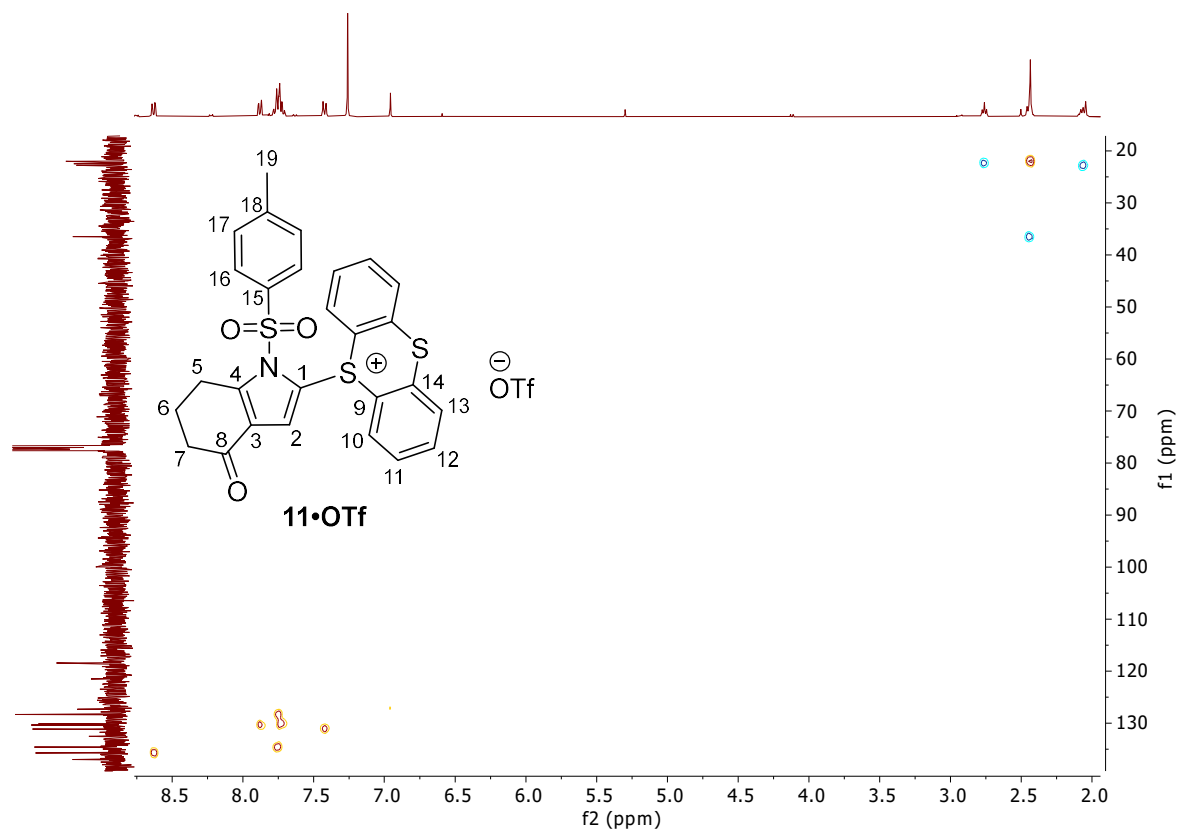

Figure S118: HSQC NMR spectrum of 5-(4-oxo-1-(p-toluenesulfonyl)-4,5,6,7-tetrahydro-1H-indol-2-yl)-5H-thianthren-5-ium trifluoromethanesulfonate **11•OTf** in CDCl<sub>3</sub>

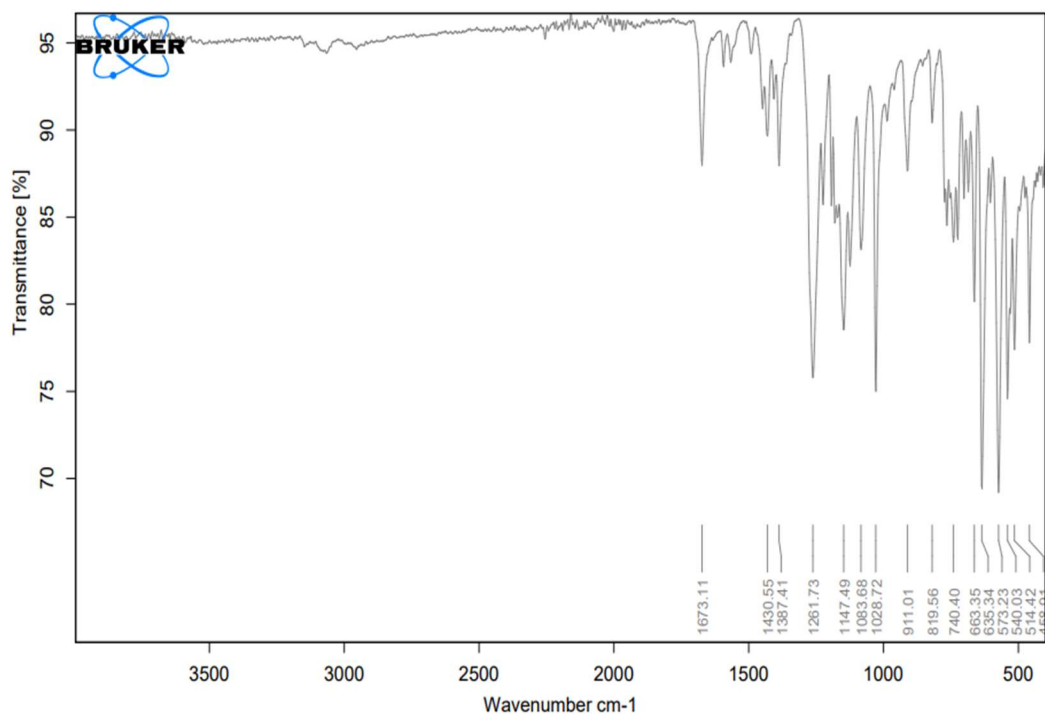

Figure S119: IR spectrum of 5-(4-oxo-1-(p-toluenesulfonyl)-4,5,6,7-tetrahydro-1H-indol-2-yl)-5H-thianthren-5-ium trifluoromethanesulfonate **11•OTf**

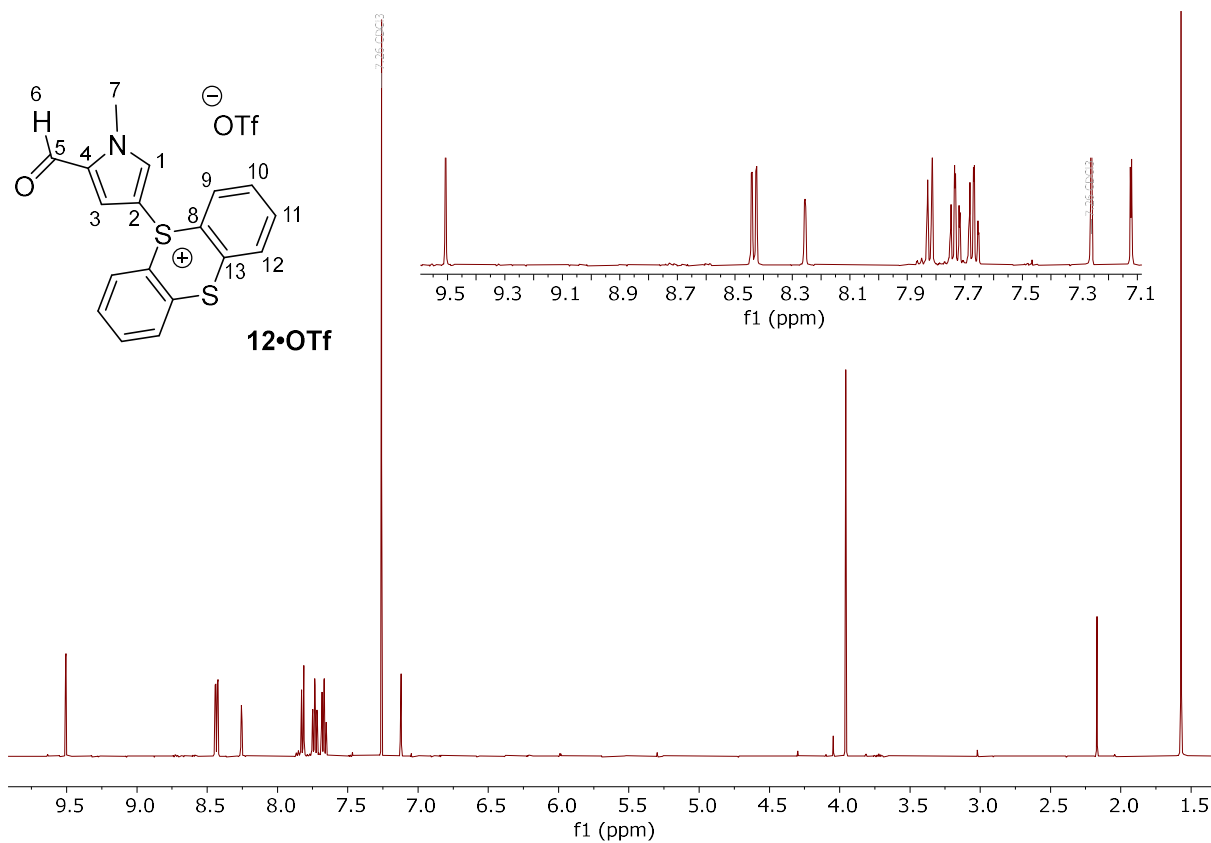

Figure S120: <sup>1</sup>H NMR spectrum of 5-(5-formyl-1-methyl-1H-pyrrol-3-yl)-5H-thianthren-5-ium trifluoromethanesulfonate **12•OTf** in CDCl<sub>3</sub>

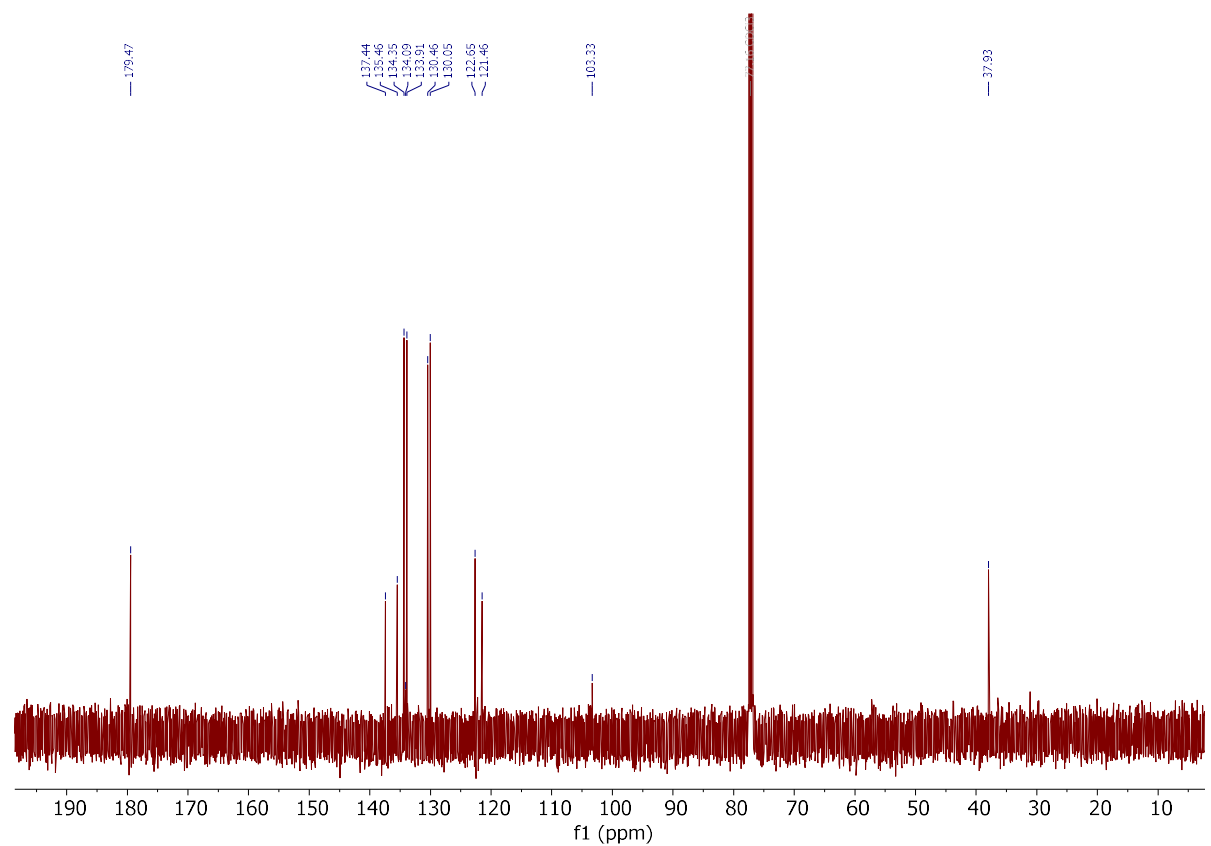

Figure S121: <sup>13</sup>C NMR spectrum of 5-(5-formyl-1-methyl-1H-pyrrol-3-yl)-5H-thianthren-5-ium trifluoromethanesulfonate **12•OTf** in CDCl<sub>3</sub>



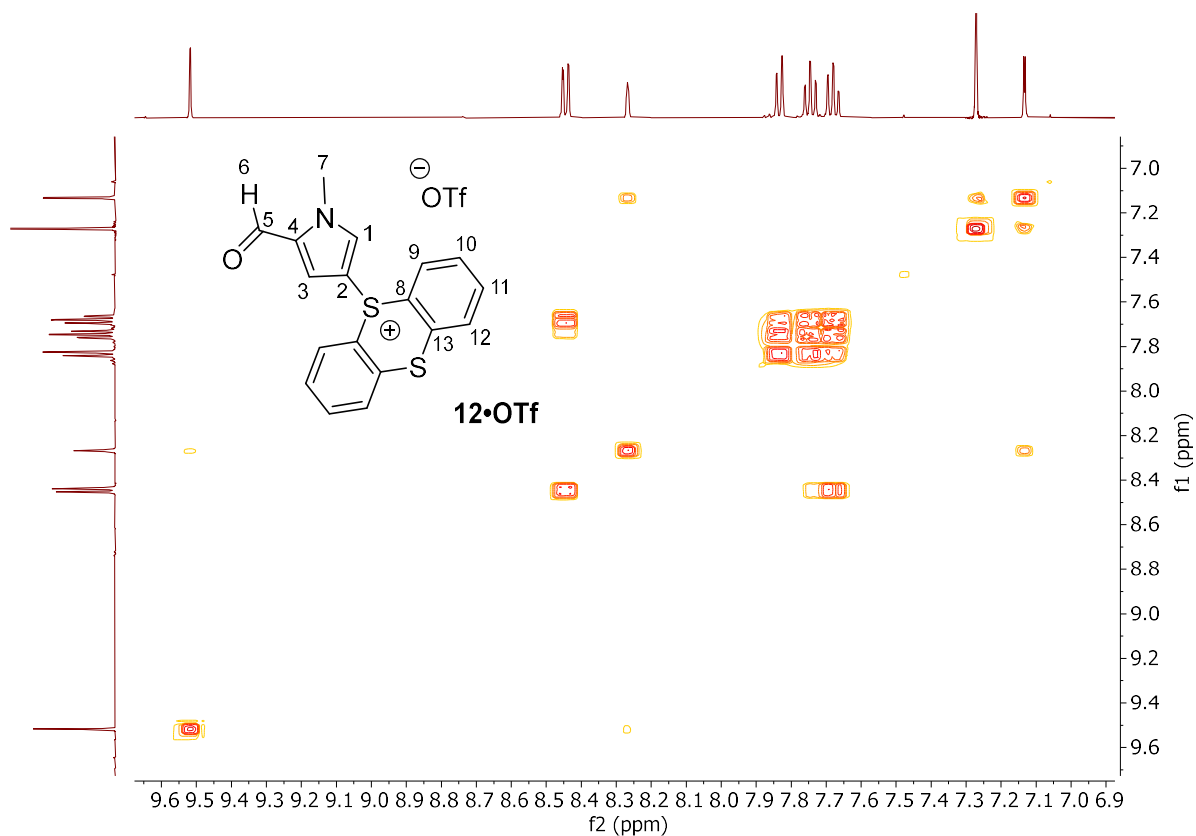

Figure S122: COSY NMR spectrum of 5-(5-formyl-1-methyl-1H-pyrrol-3-yl)-5H-thianthren-5-ium trifluoromethanesulfonate **12•OTf** in  $\text{CDCl}_3$

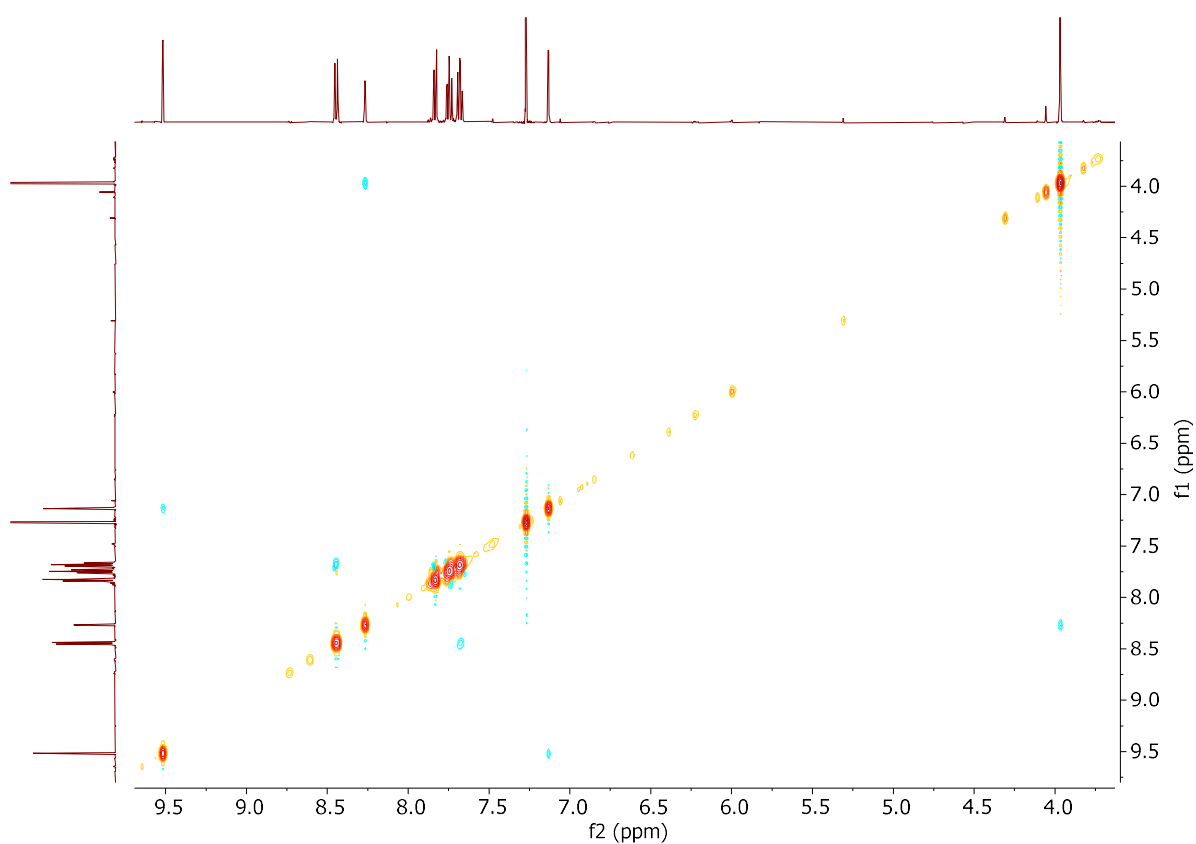

Figure S123: NOESY NMR spectrum of 5-(5-formyl-1-methyl-1H-pyrrol-3-yl)-5H-thianthren-5-ium trifluoromethanesulfonate **12•OTf** in  $\text{CDCl}_3$

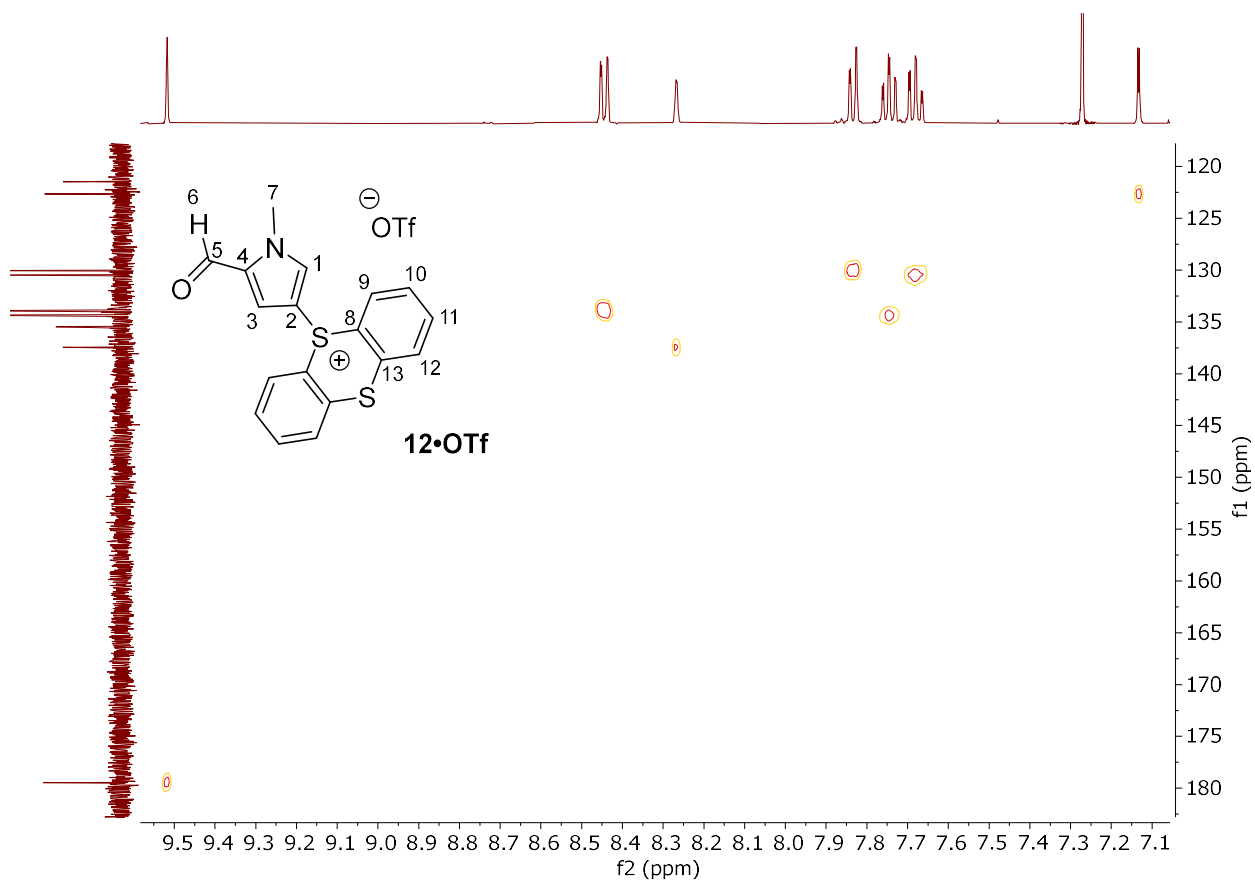

Figure S124: HSQC NMR spectrum of 5-(5-formyl-1-methyl-1H-pyrrol-3-yl)-5H-thianthren-5-ium trifluoromethanesulfonate **12•OTf** in  $\text{CDCl}_3$

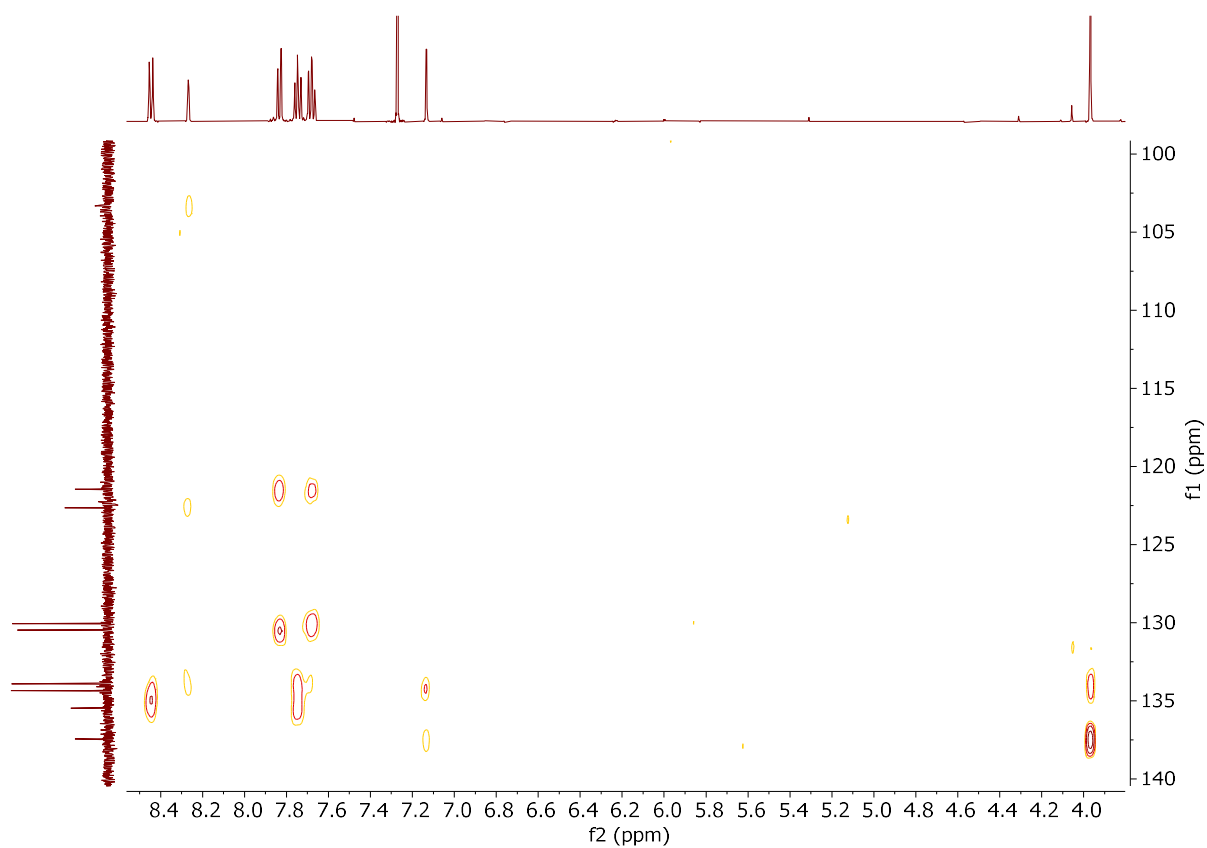

Figure S125: HMBC NMR spectrum of 5-(5-formyl-1-methyl-1H-pyrrol-3-yl)-5H-thianthren-5-ium trifluoromethanesulfonate **12•OTf** in  $\text{CDCl}_3$

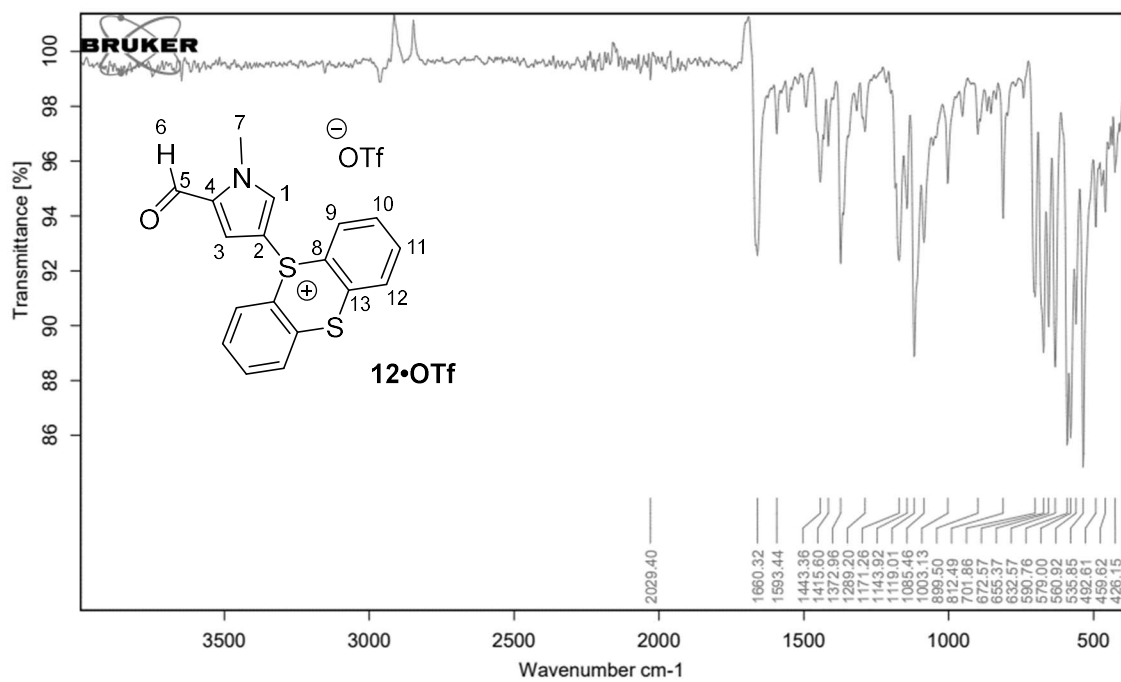

Figure S126: IR spectrum of 5-(5-formyl-1-methyl-1H-pyrrol-3-yl)-5H-thianthren-5-ium trifluoromethanesulfonate **12•OTf**

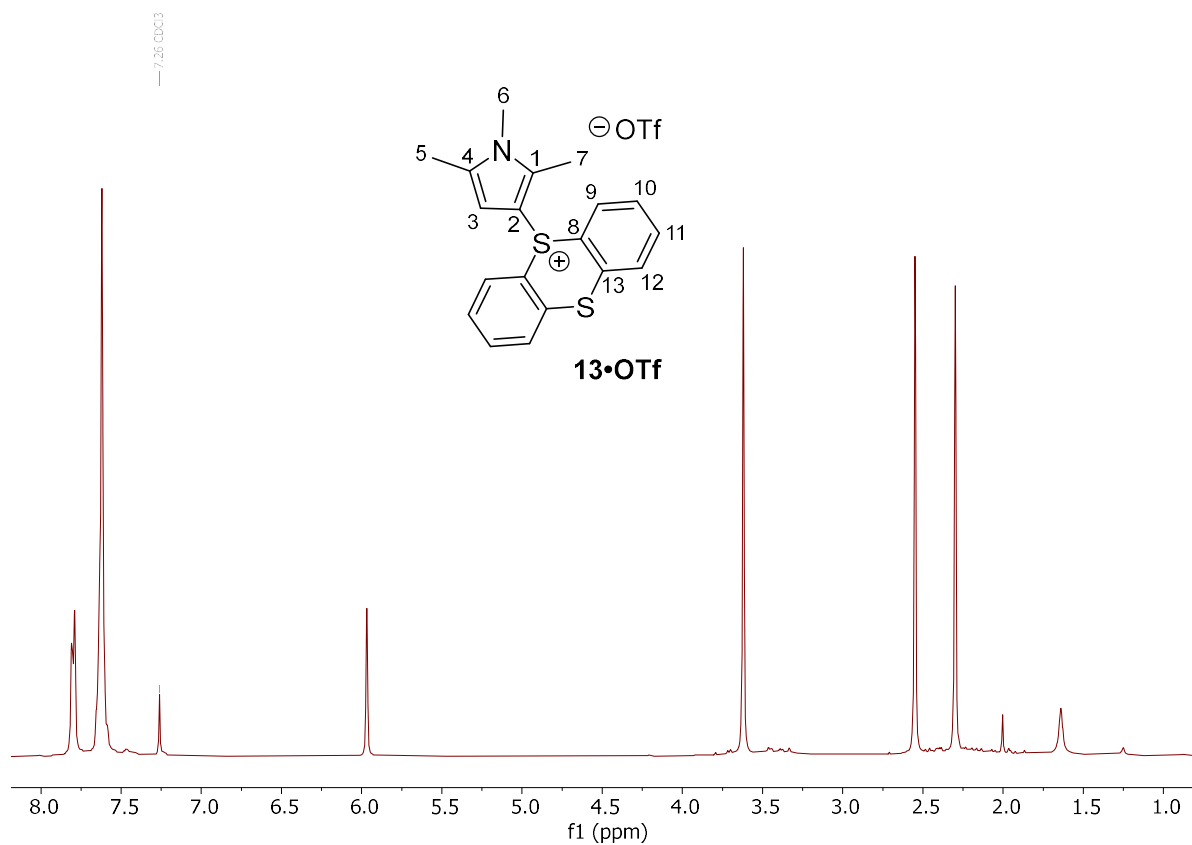

Figure S127:  $^1\text{H}$  NMR spectrum of 5-(1,2,5-trimethyl-1H-pyrrol-3-yl)-5H-thianthren-5-ium trifluoromethanesulfonate **13•OTf** in  $\text{CDCl}_3$

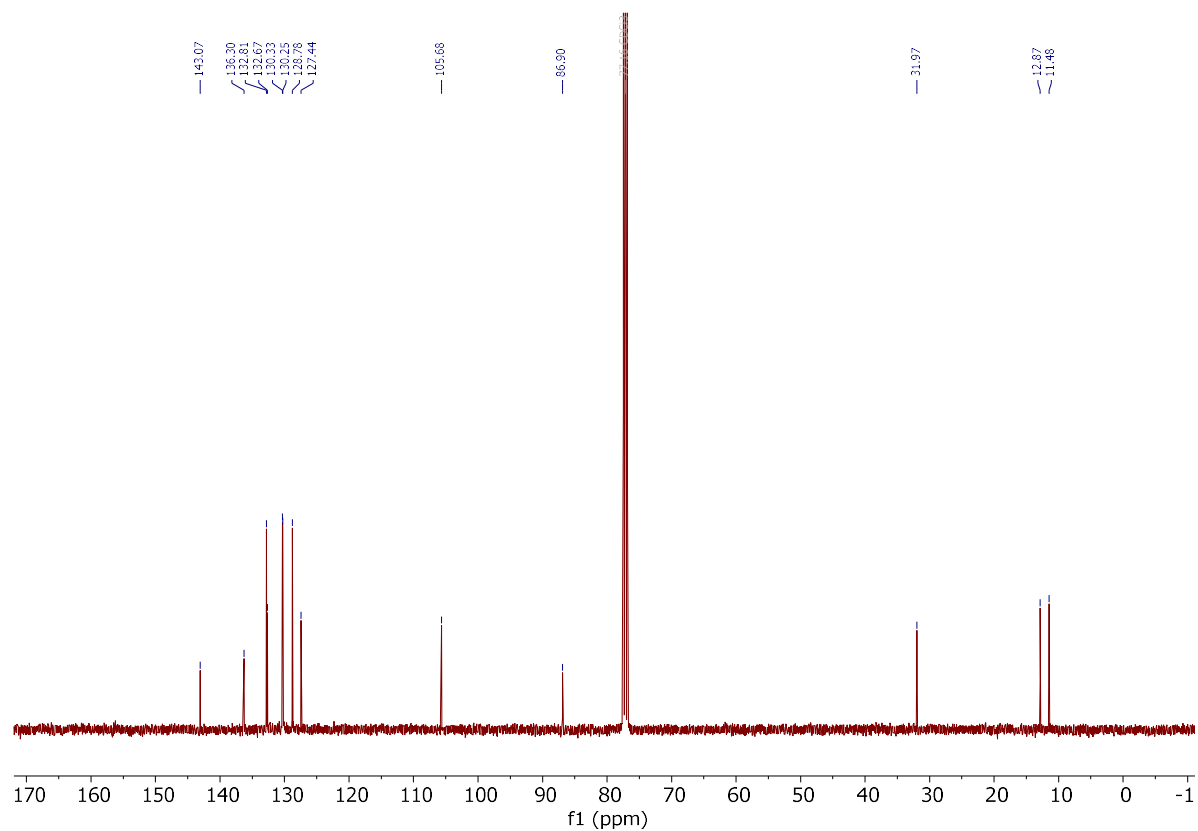

Figure S128:  $^{13}\text{C}$  NMR spectrum of 5-(1,2,5-trimethyl-1H-pyrrol-3-yl)-5H-thianthren-5-ium trifluoromethanesulfonate **13•OTf** in  $\text{CDCl}_3$

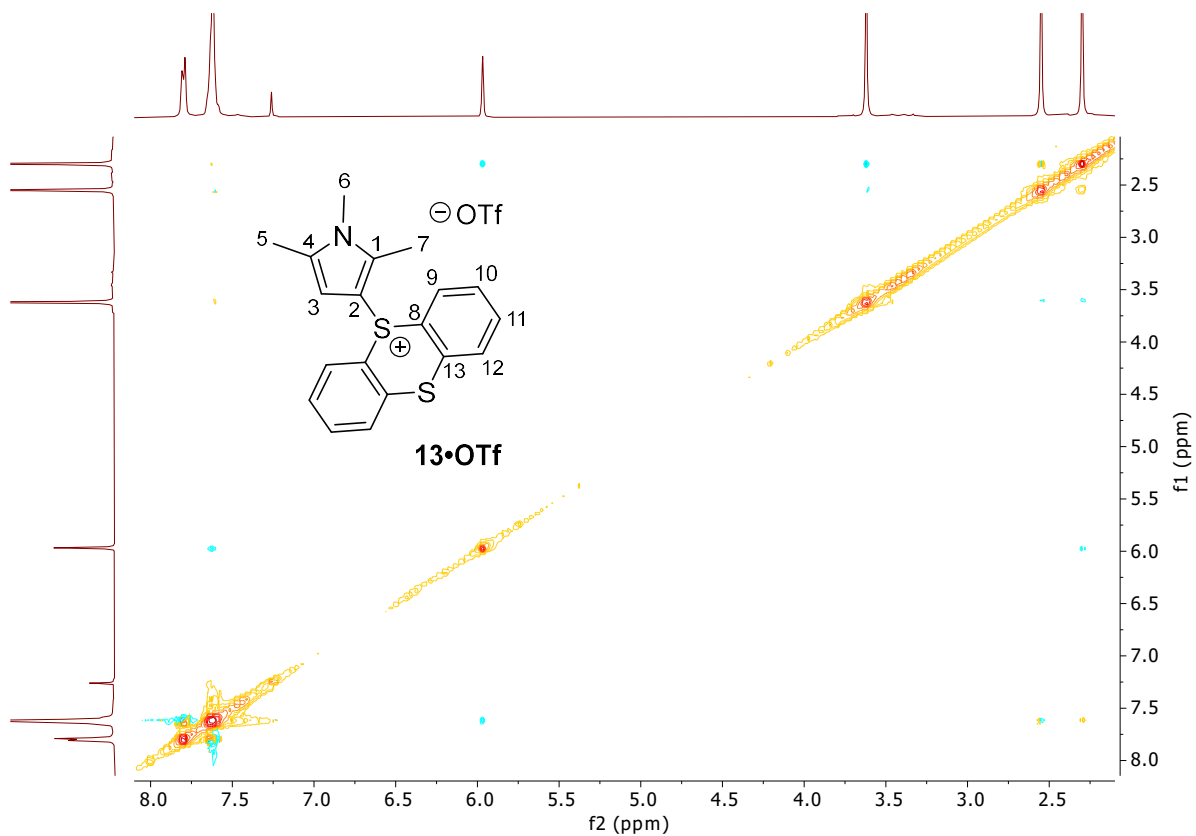

Figure S129: NOESY NMR spectrum of 5-(1,2,5-trimethyl-1H-pyrrol-3-yl)-5H-thianthren-5-ium trifluoromethanesulfonate **13•OTf** in  $CDCl_3$

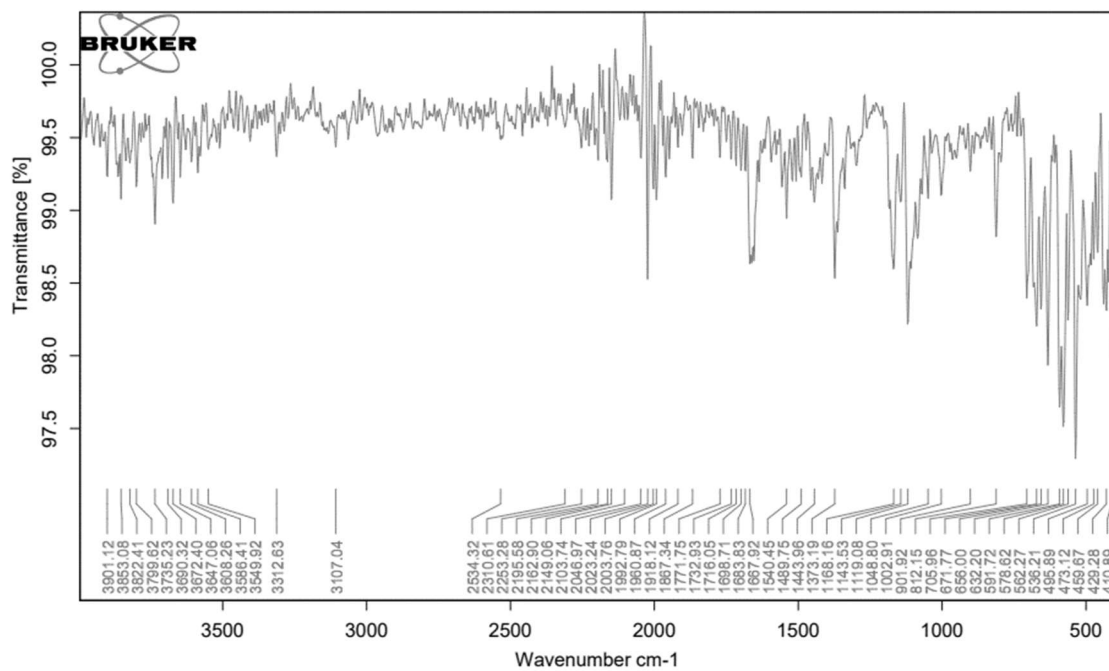

Figure S130: IR spectrum of 5-(1,2,5-trimethyl-1H-pyrrol-3-yl)-5H-thianthren-5-ium trifluoromethanesulfonate **13•OTf**

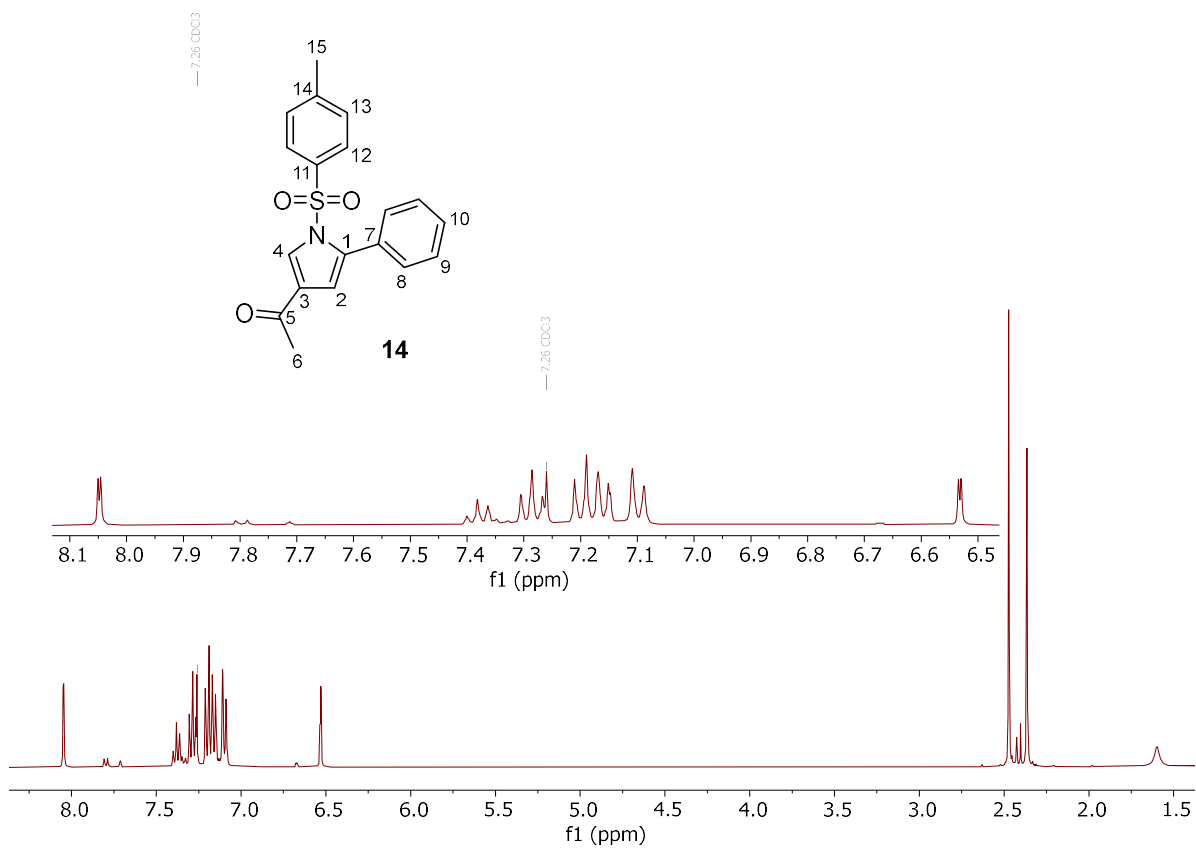

Figure S131:  $^1\text{H}$  NMR spectrum of 1-(5-phenyl-1-(p-toluenesulfonyl)-1H-pyrrol-3-yl)ethan-1-one **14** in  $\text{CDCl}_3$

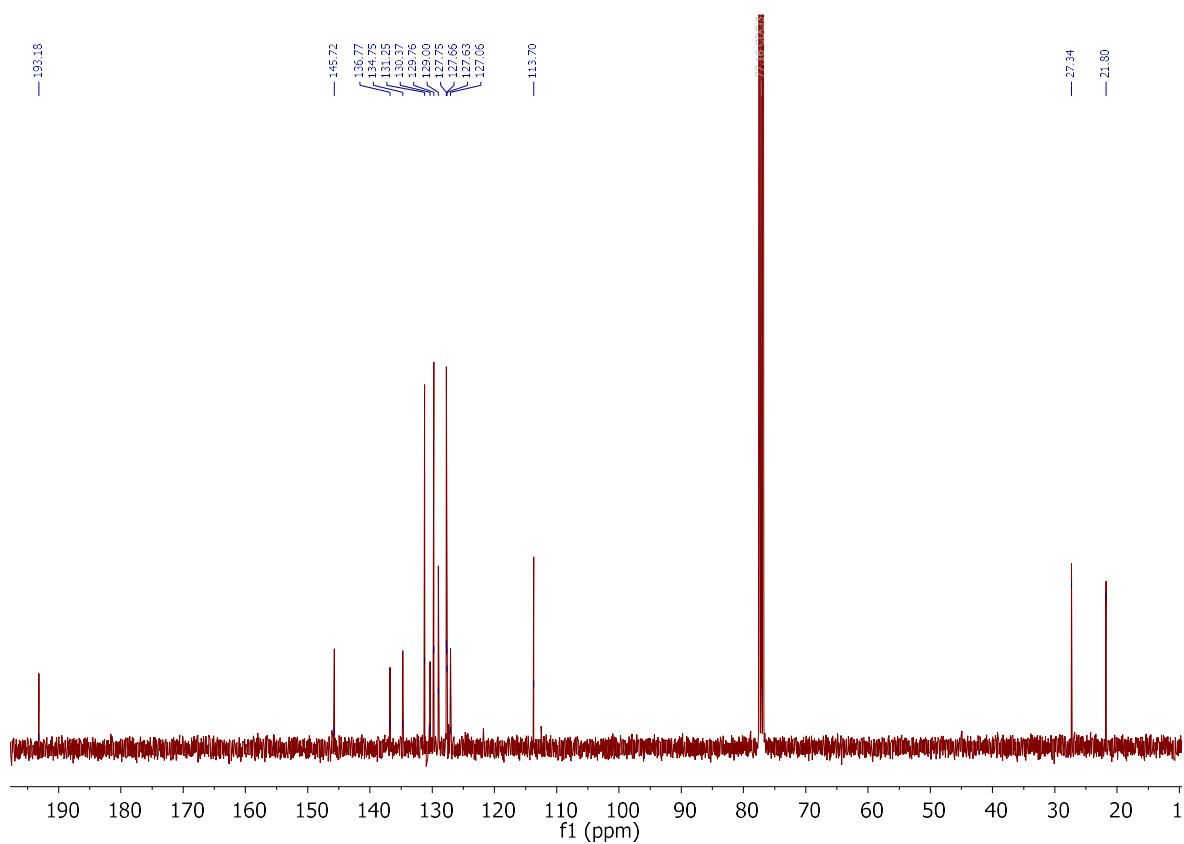

Figure S132:  $^{13}\text{C}$  NMR spectrum of 1-(5-phenyl-1-(p-toluenesulfonyl)-1H-pyrrol-3-yl)ethan-1-one **14** in  $\text{CDCl}_3$

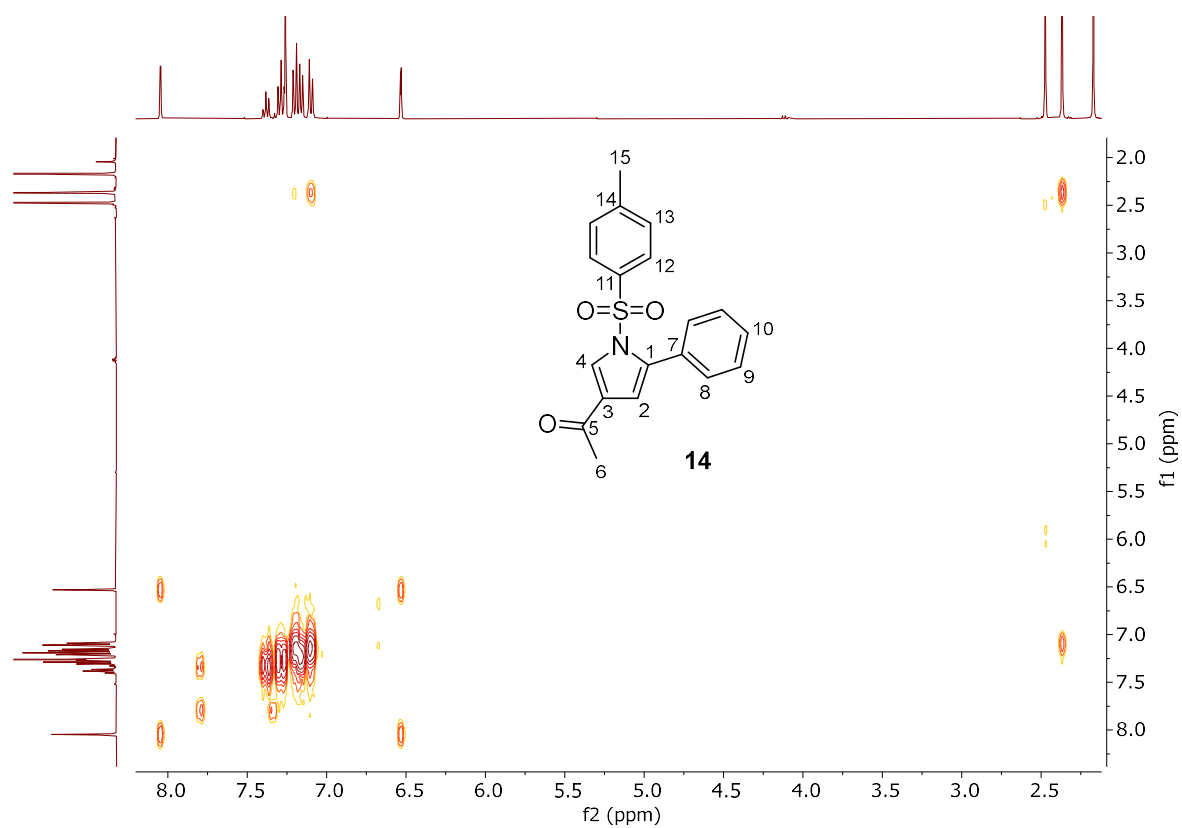

Figure S133: COSY NMR spectrum of 1-(5-phenyl-1-(p-toluenesulfonyl)-1H-pyrrol-3-yl)ethan-1-one **14** in CDCl<sub>3</sub>

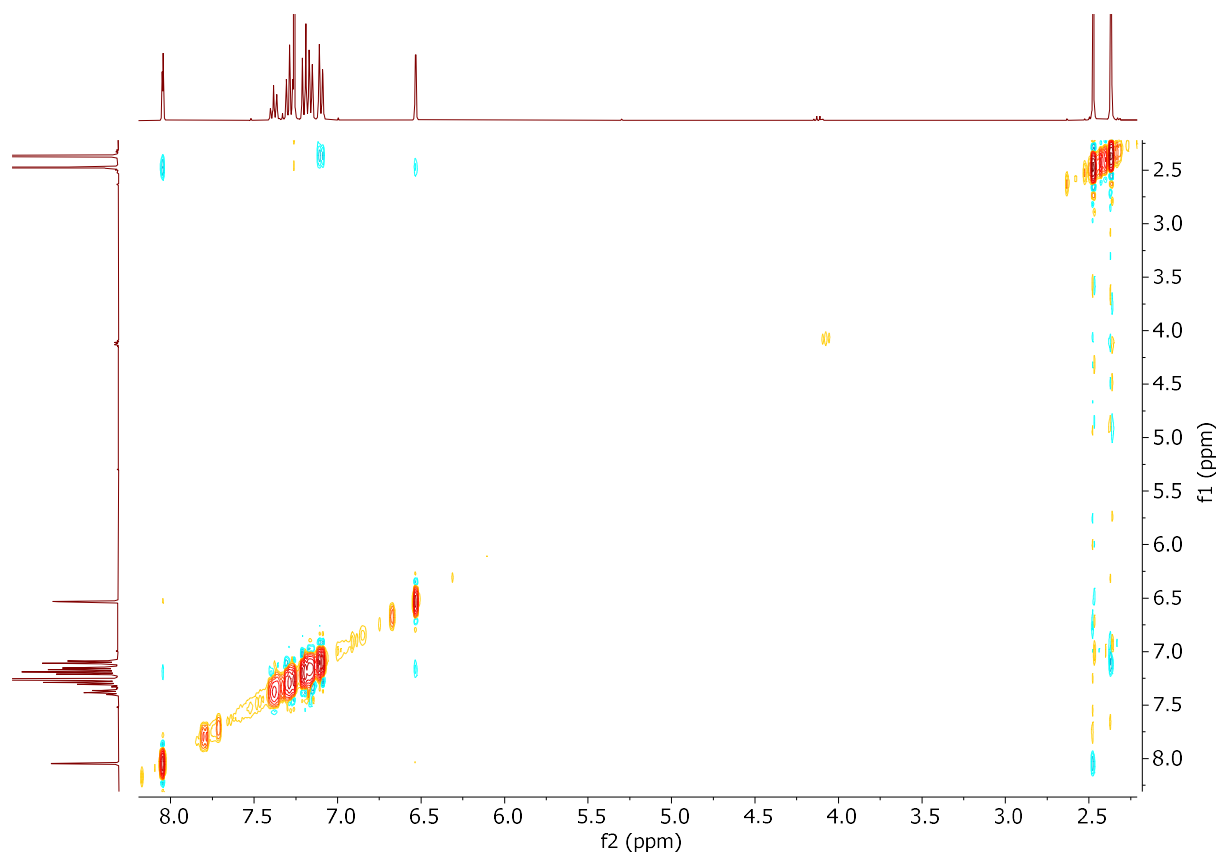

Figure S134: NOESY NMR spectrum of 1-(5-phenyl-1-(p-toluenesulfonyl)-1H-pyrrol-3-yl)ethan-1-one **14** in CDCl<sub>3</sub>

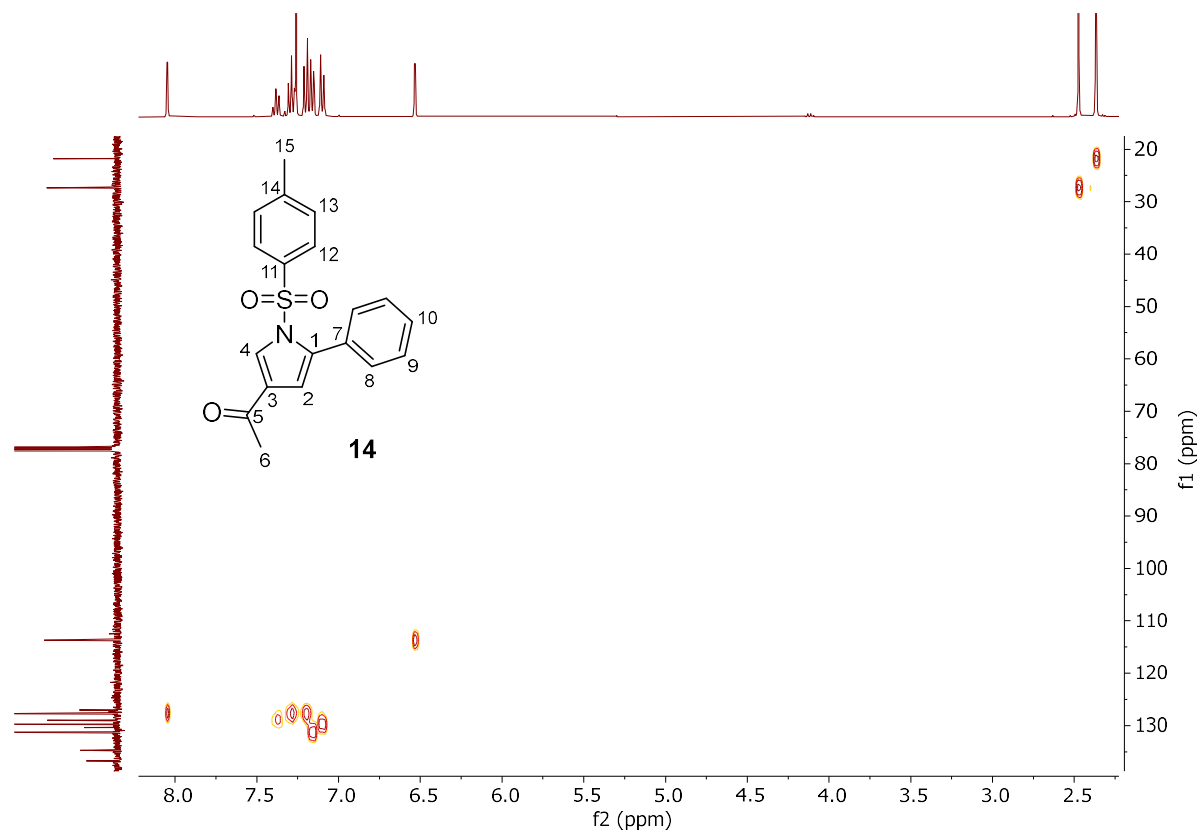

Figure S135: HSQC NMR spectrum of 1-(5-phenyl-1-(p-toluenesulfonyl)-1H-pyrrol-3-yl)ethan-1-one **14** in CDCl<sub>3</sub>

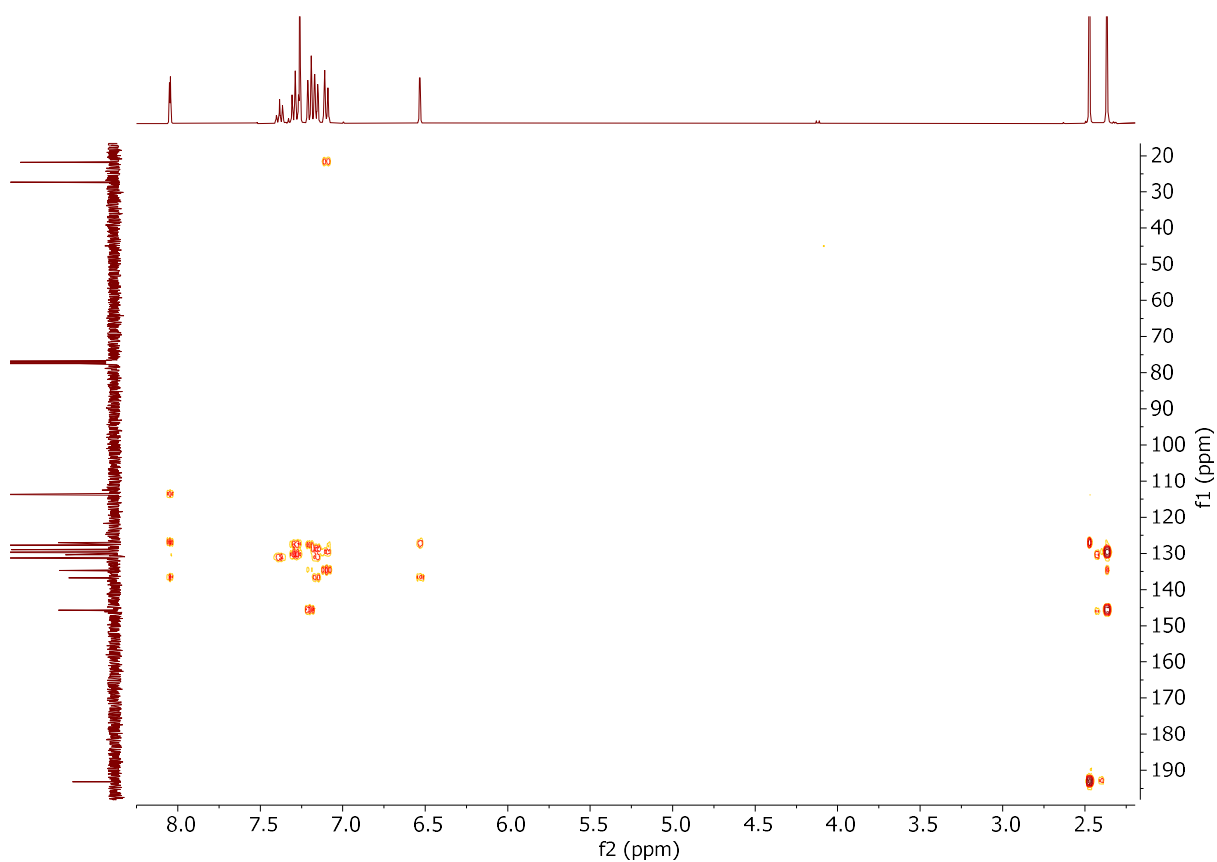

Figure S136: HMBC NMR spectrum of 1-(5-phenyl-1-(p-toluenesulfonyl)-1H-pyrrol-3-yl)ethan-1-one **14** in CDCl<sub>3</sub>



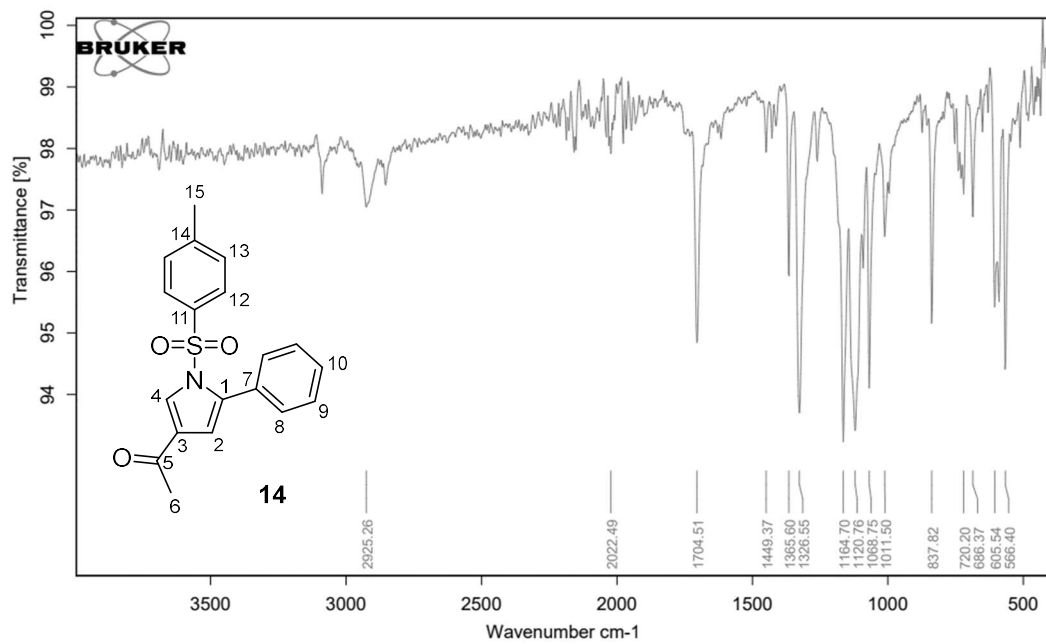

Figure S137: IR spectrum of 1-(5-phenyl-1-(p-toluenesulfonyl)-1H-pyrrol-3-yl)ethan-1-one **14**

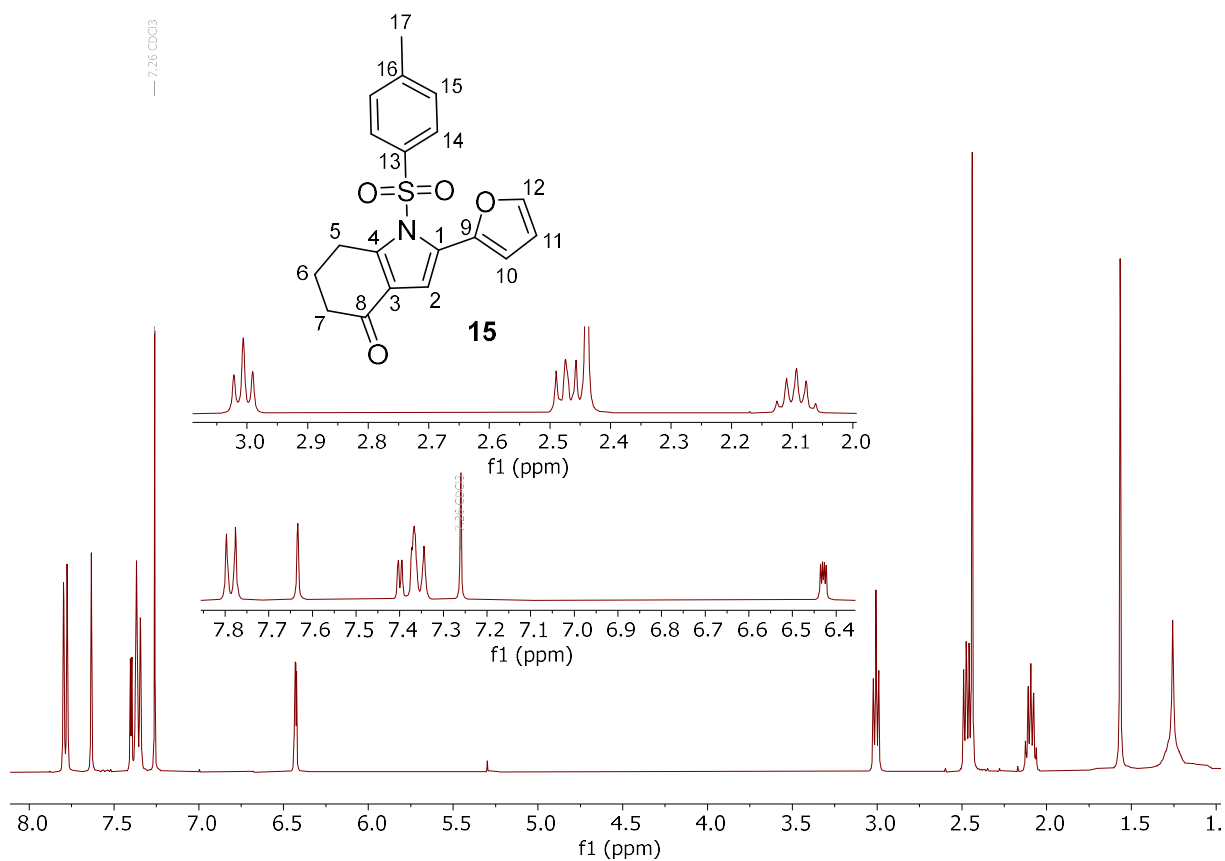

Figure S138:  $^1\text{H}$  NMR spectrum of 2-(furan-2-yl)-1-(p-toluenesulfonyl)-1,5,6,7-tetrahydro-4H-indol-4-one **15** in CDCl<sub>3</sub>.

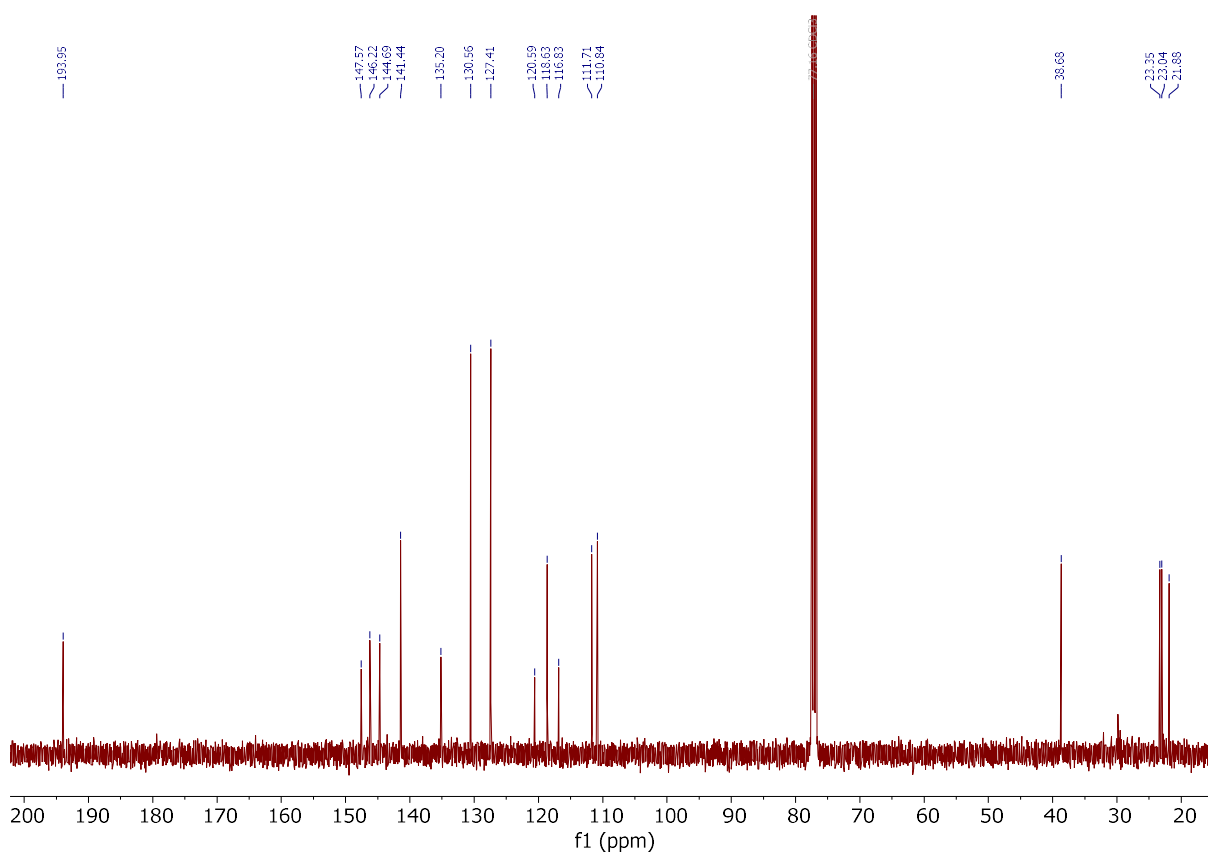

Figure S139:  $^{13}\text{C}$  NMR spectrum of 2-(furan-2-yl)-1-(p-toluenesulfonyl)-1,5,6,7-tetrahydro-4H-indol-4-one **15** in CDCl<sub>3</sub>.

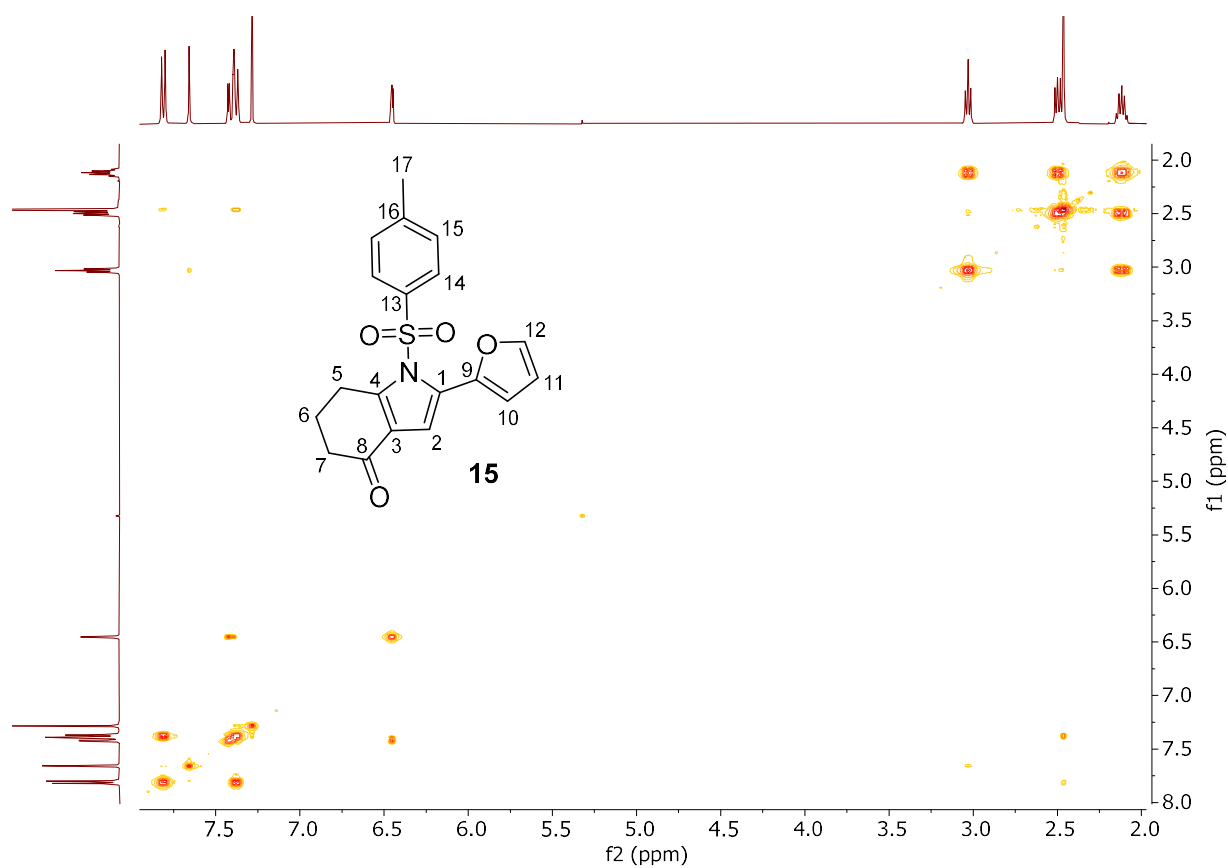

Figure S140: COSY NMR spectrum of 2-(furan-2-yl)-1-(p-toluenesulfonyl)-1,5,6,7-tetrahydro-4H-indol-4-one **15** in CDCl<sub>3</sub>.

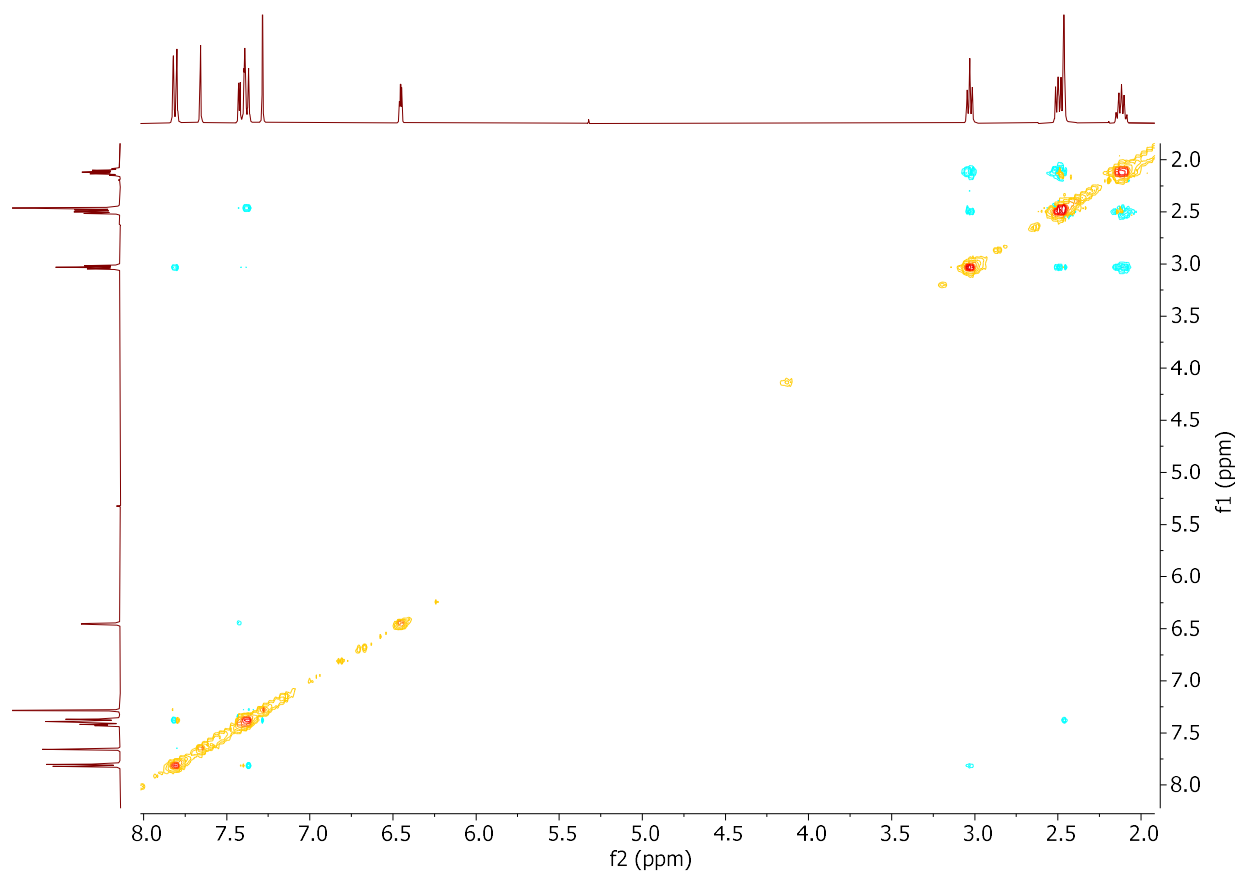

Figure S141: NOESY NMR spectrum of 2-(furan-2-yl)-1-(p-toluenesulfonyl)-1,5,6,7-tetrahydro-4H-indol-4-one **15** in CDCl<sub>3</sub>.

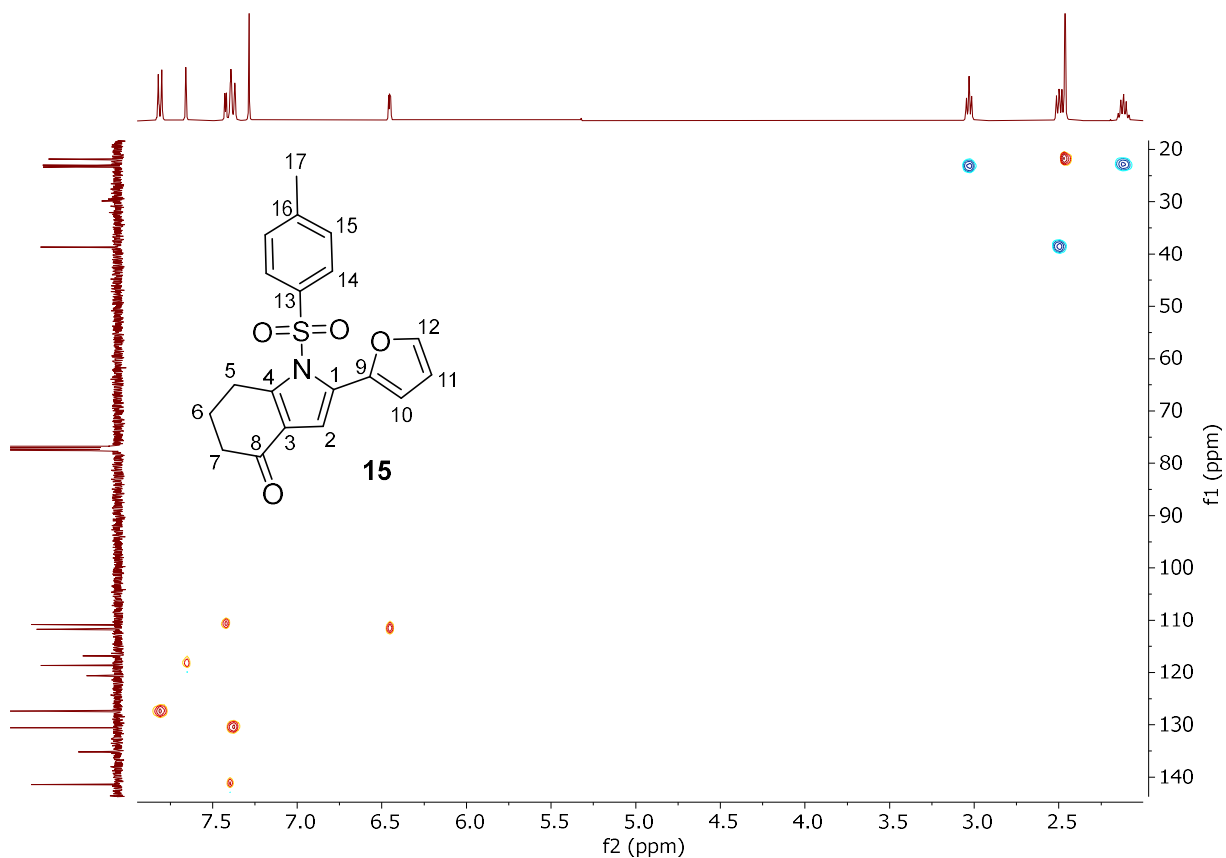

Figure S142: HSQC NMR spectrum of 2-(furan-2-yl)-1-(p-toluenesulfonyl)-1,5,6,7-tetrahydro-4H-indol-4-one **15** in  $CDCl_3$ .

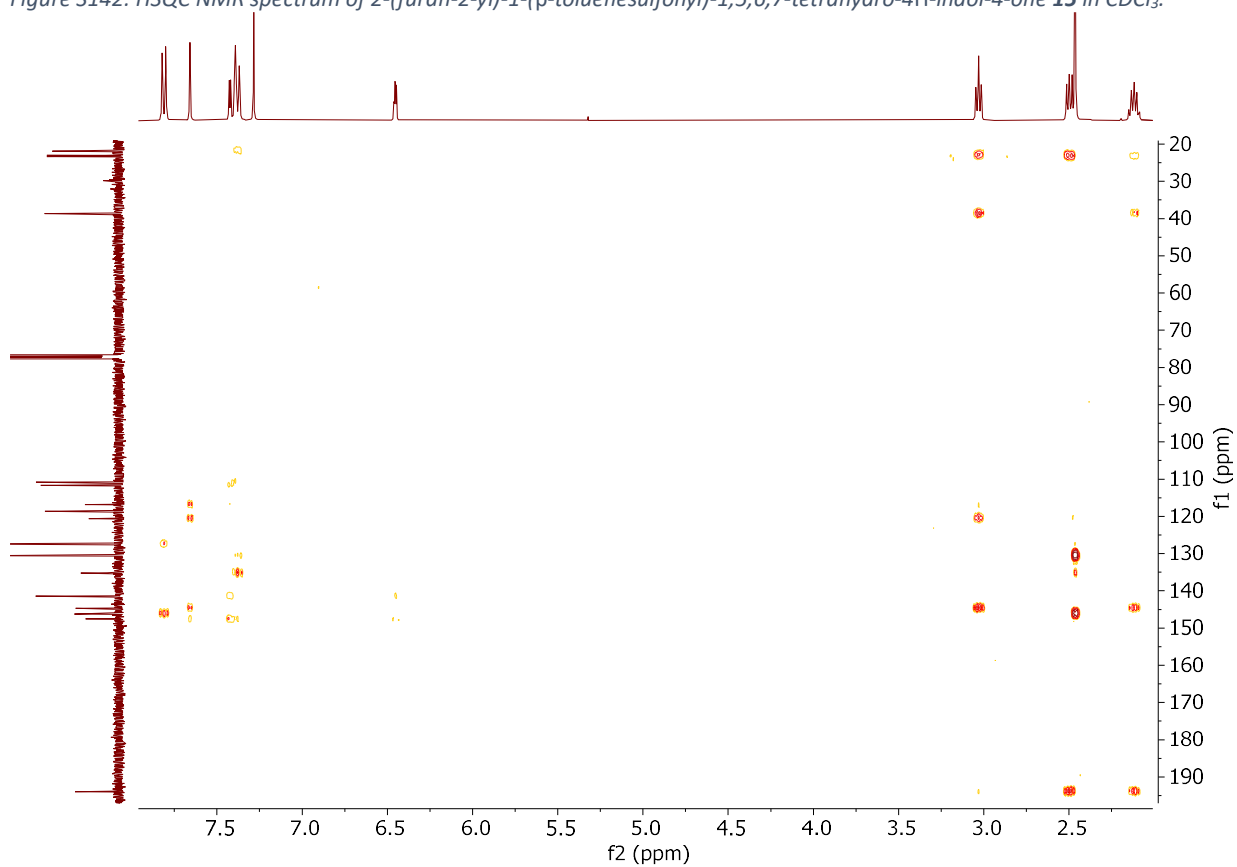

Figure S143: HMBC NMR spectrum of 2-(furan-2-yl)-1-(p-toluenesulfonyl)-1,5,6,7-tetrahydro-4H-indol-4-one **15** in  $CDCl_3$ .

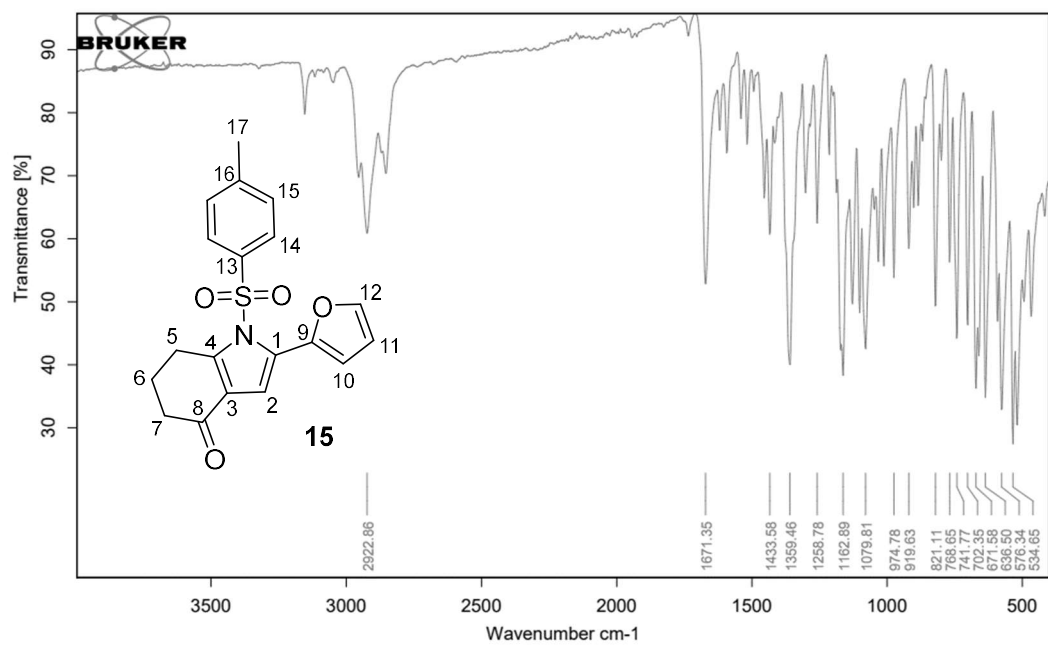

Figure S144: IR Spectrum of spectrum of 2-(furan-2-yl)-1-(p-toluenesulfonyl)-1,5,6,7-tetrahydro-4H-indol-4-one 15

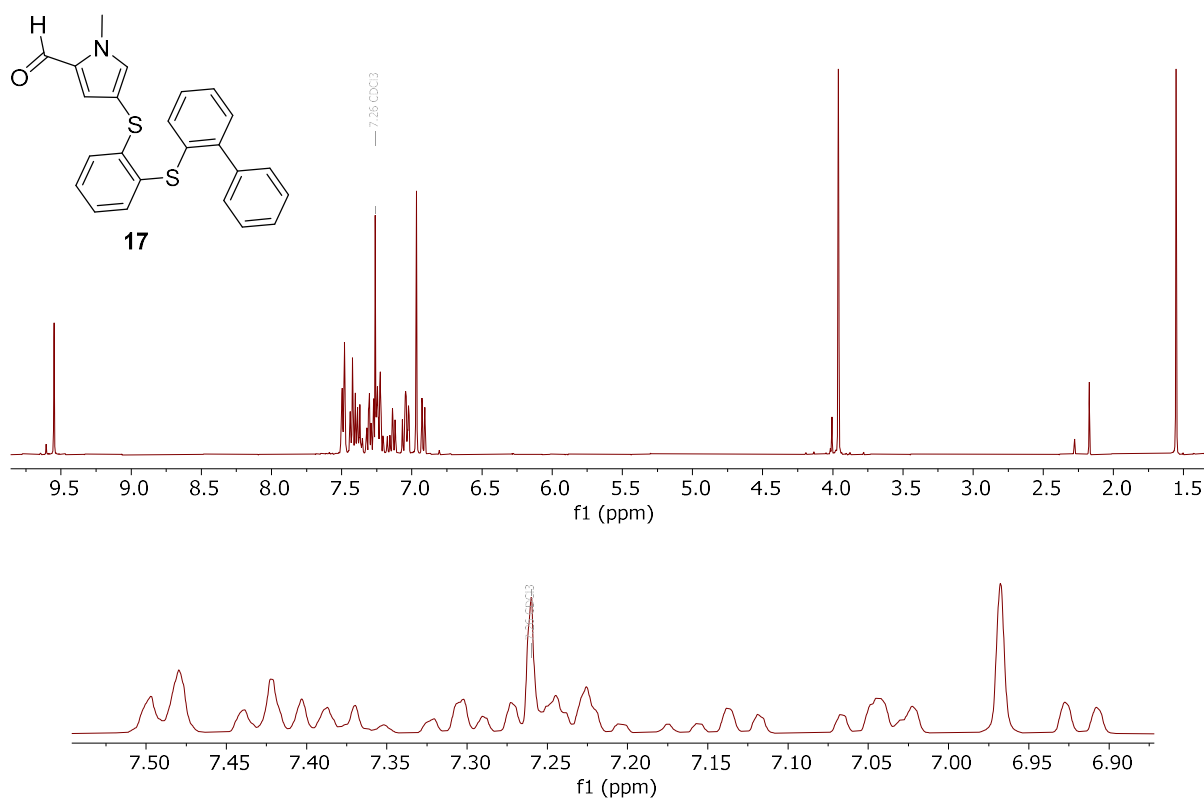

Figure S145:  $^1\text{H}$  NMR spectrum of 4-((2-([1,1'-biphenyl]-2-ylthio)phenyl)thio)-1-methyl-1H-pyrrole-2-carbaldehyde **17** in  $\text{CDCl}_3$

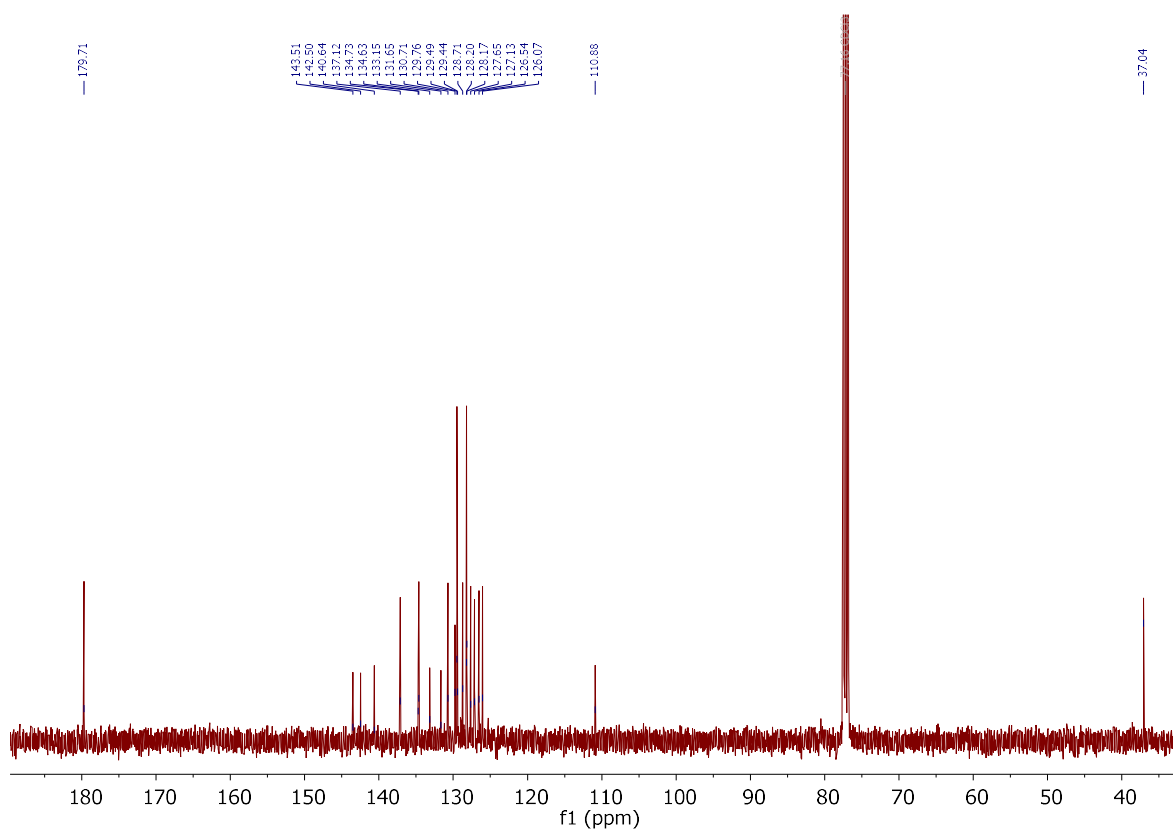

Figure S146:  $^{13}\text{C}$  NMR spectrum of 4-((2-([1,1'-biphenyl]-2-ylthio)phenyl)thio)-1-methyl-1H-pyrrole-2-carbaldehyde **17** in  $\text{CDCl}_3$

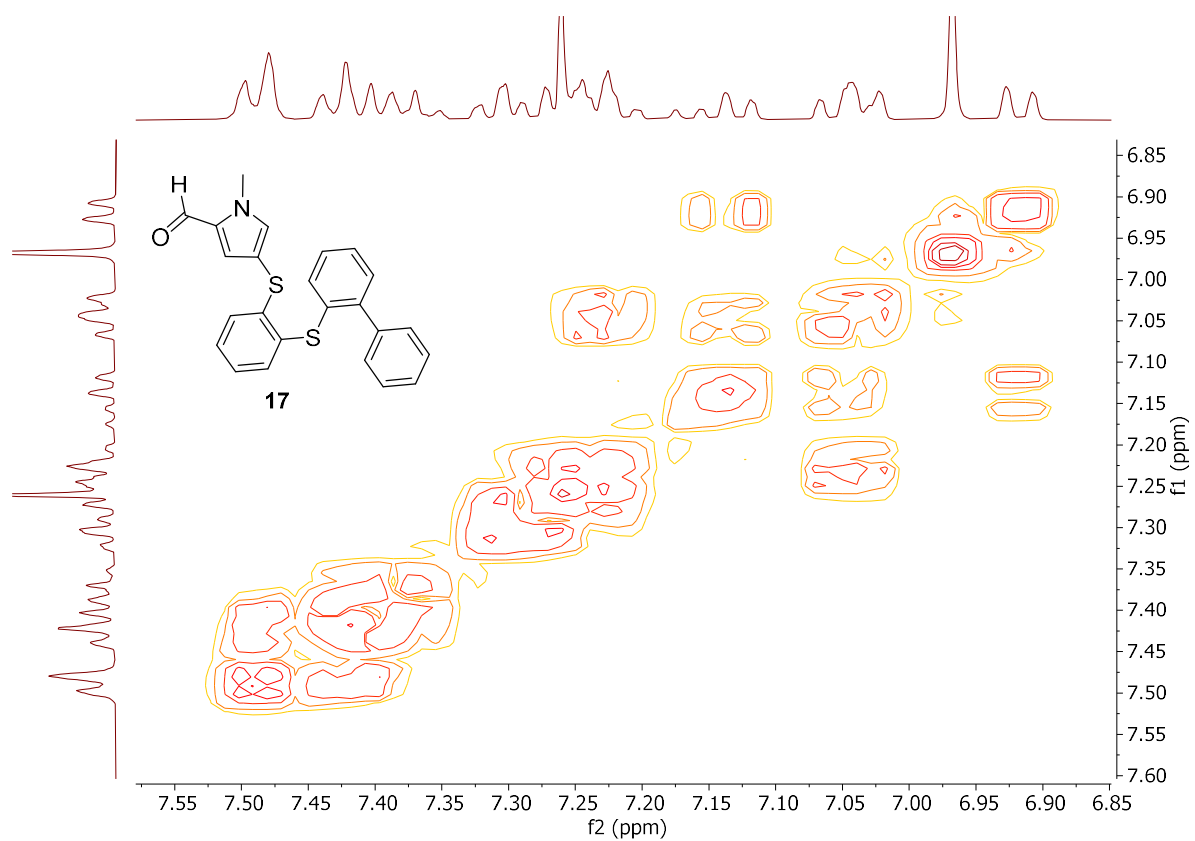

Figure S147: COSY spectrum of 4-((2-([1,1'-biphenyl]-2-ylthio)phenyl)thio)-1-methyl-1H-pyrrole-2-carbaldehyde **17** in  $CDCl_3$

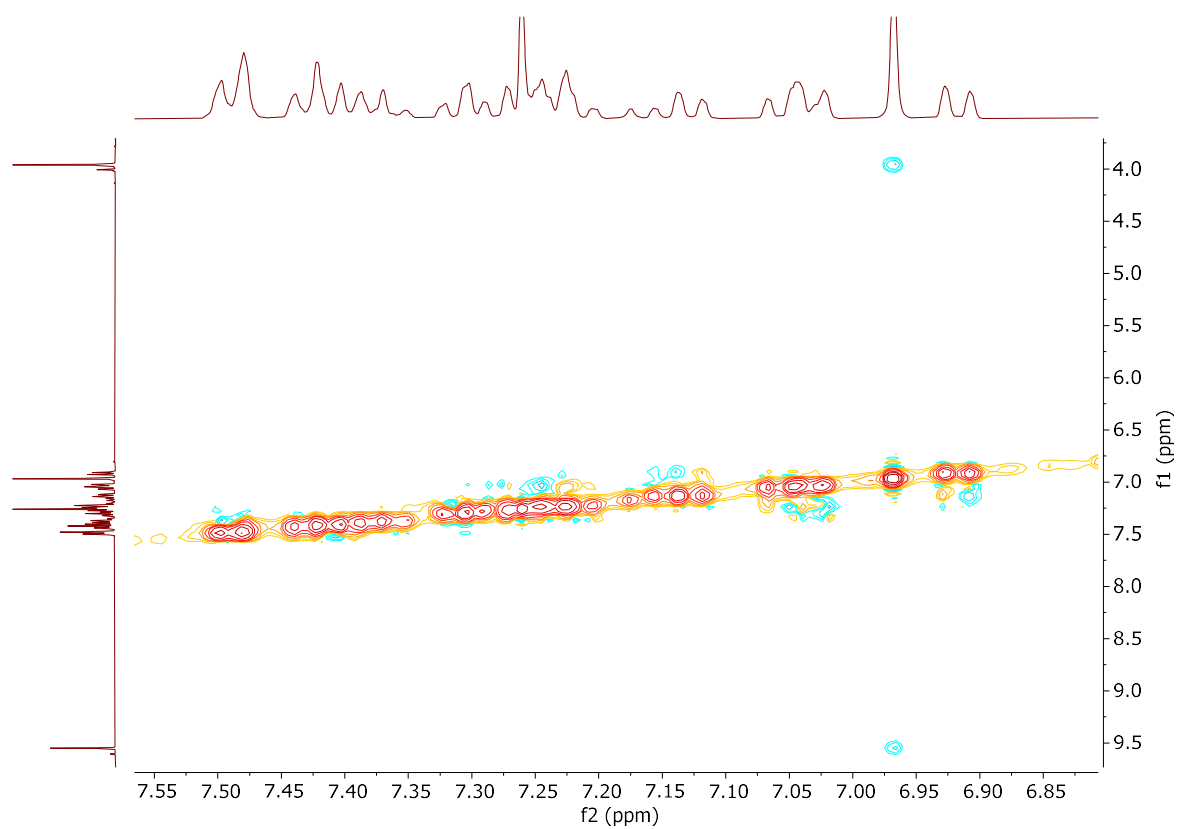

Figure S148: NOESY spectrum of 4-((2-([1,1'-biphenyl]-2-ylthio)phenyl)thio)-1-methyl-1H-pyrrole-2-carbaldehyde **17** in  $CDCl_3$

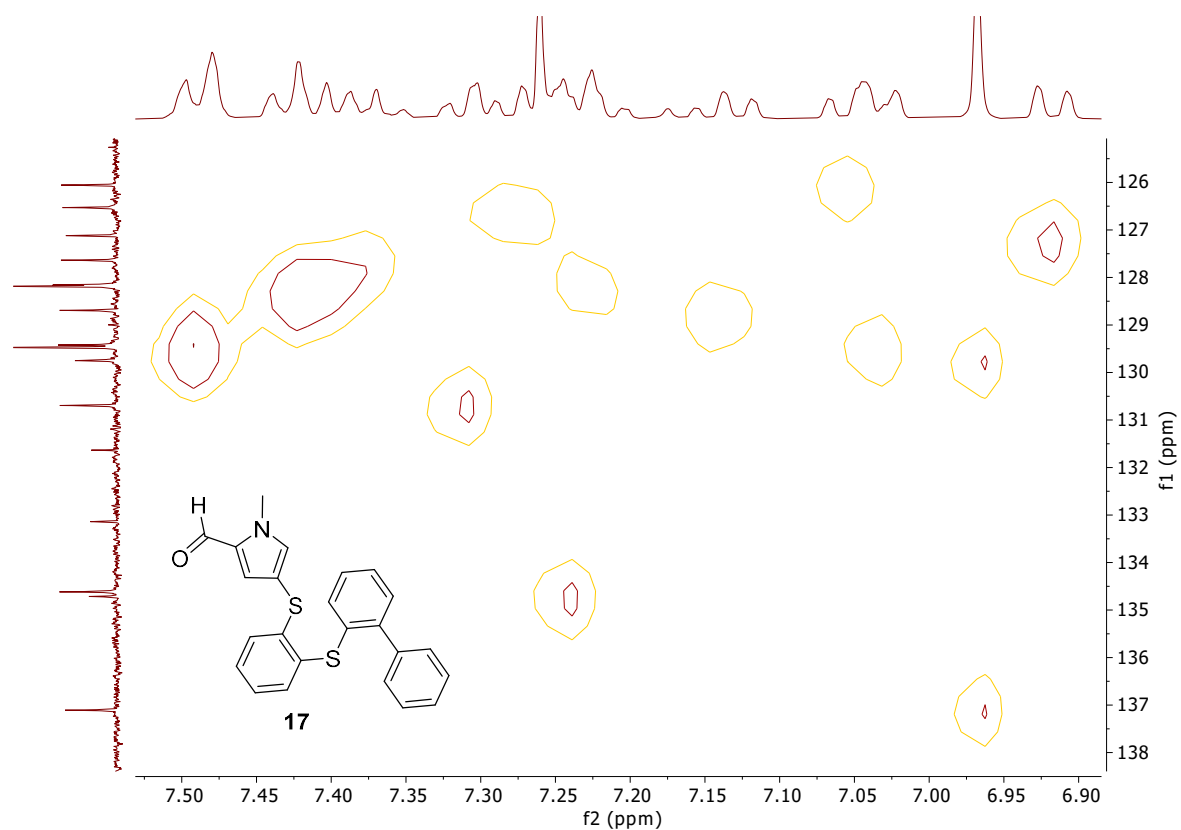

Figure S149: HSQC spectrum of 4-((2-([1,1'-biphenyl]-2-ylthio)phenyl)thio)-1-methyl-1H-pyrrole-2-carbaldehyde **17** in  $\text{CDCl}_3$

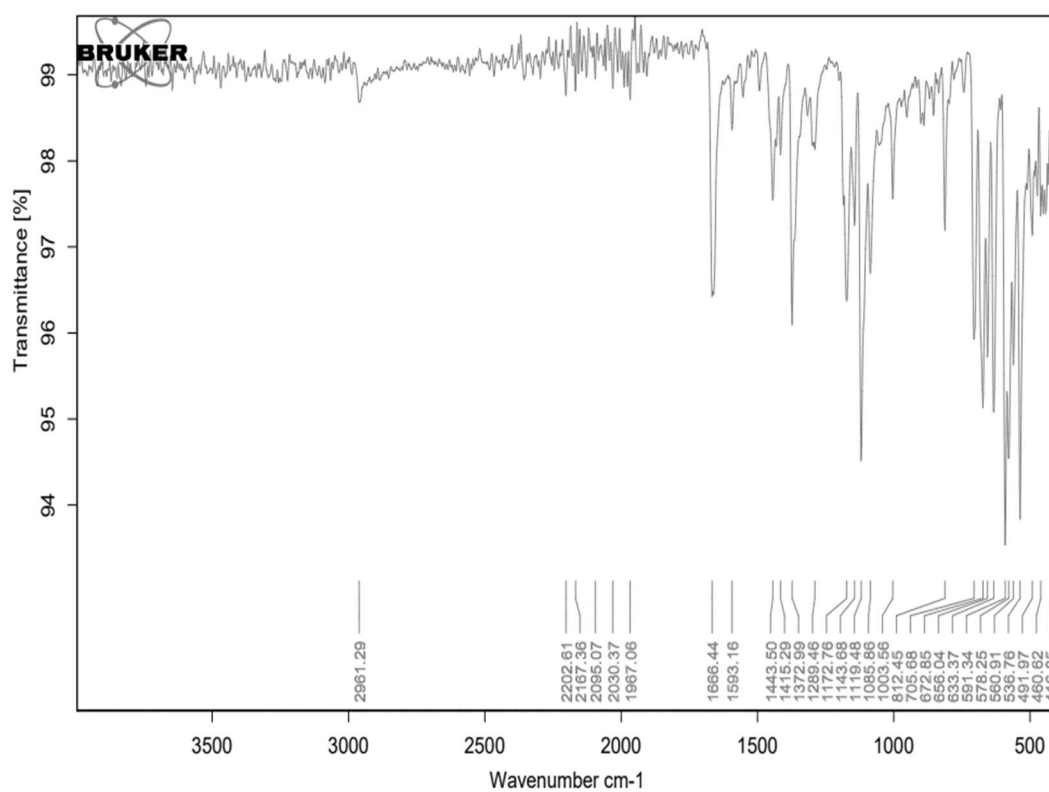

Figure S150: IR spectrum of spectrum of 4-((2-([1,1'-biphenyl]-2-ylthio)phenyl)thio)-1-methyl-1H-pyrrole-2-carbaldehyde **17**



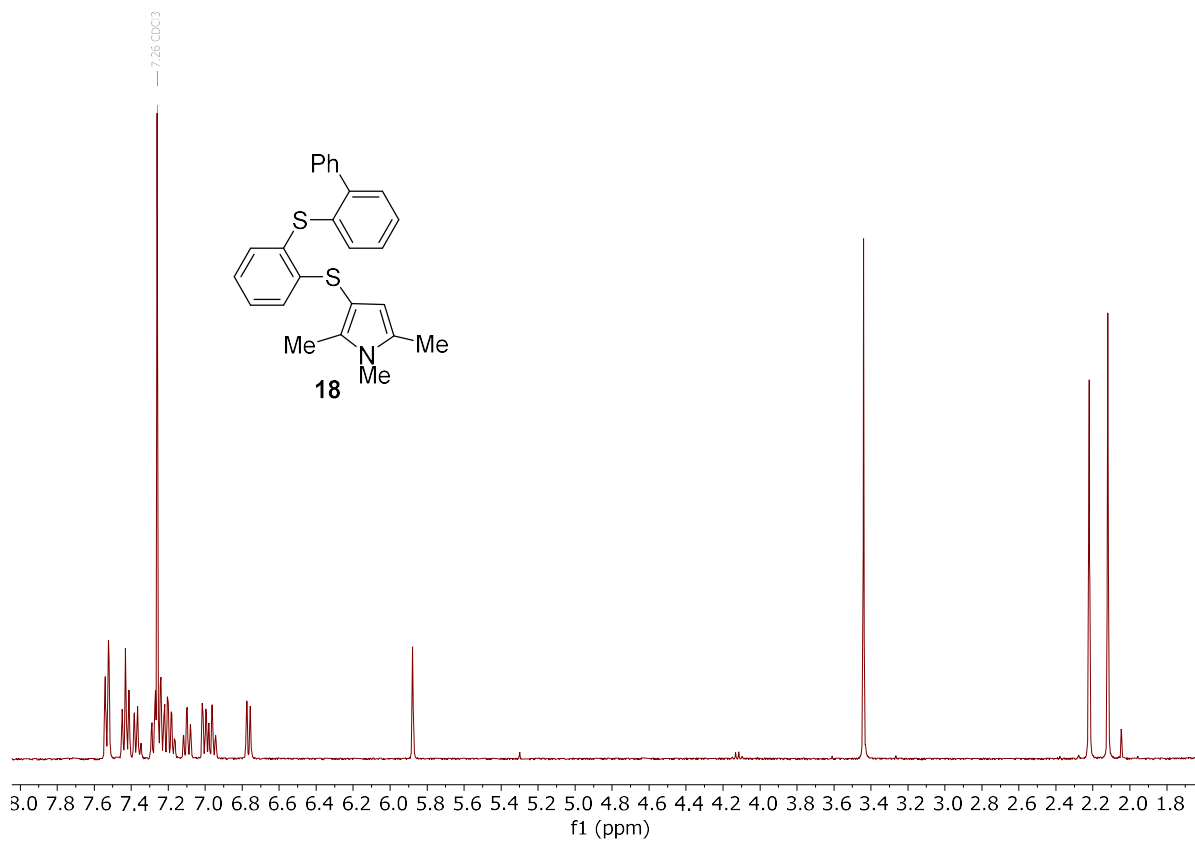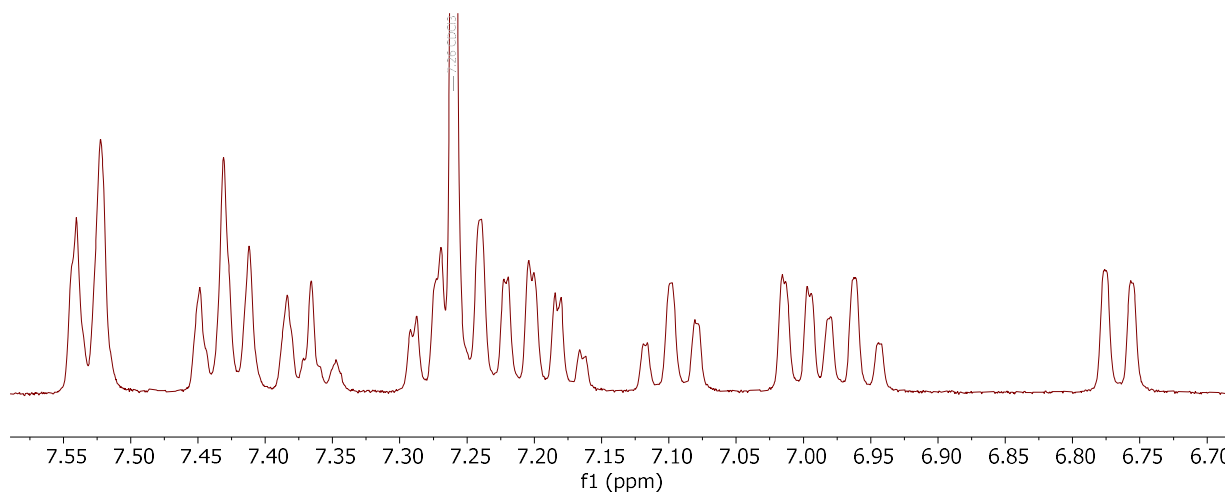

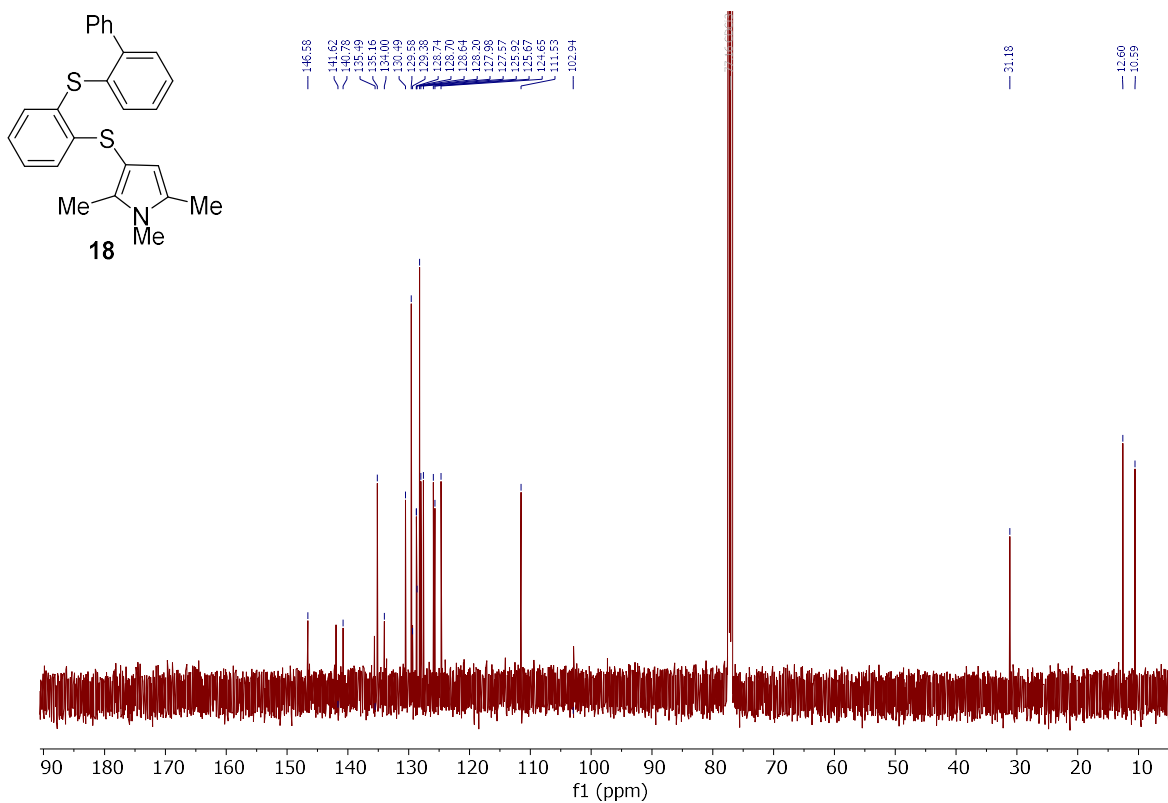

Figure S153: <sup>13</sup>C NMR spectrum of 3-((2-([1,1'-biphenyl]-2-ylthio)phenyl)thio)-1,2,5-trimethyl-1H-pyrrole **18** in CDCl<sub>3</sub>

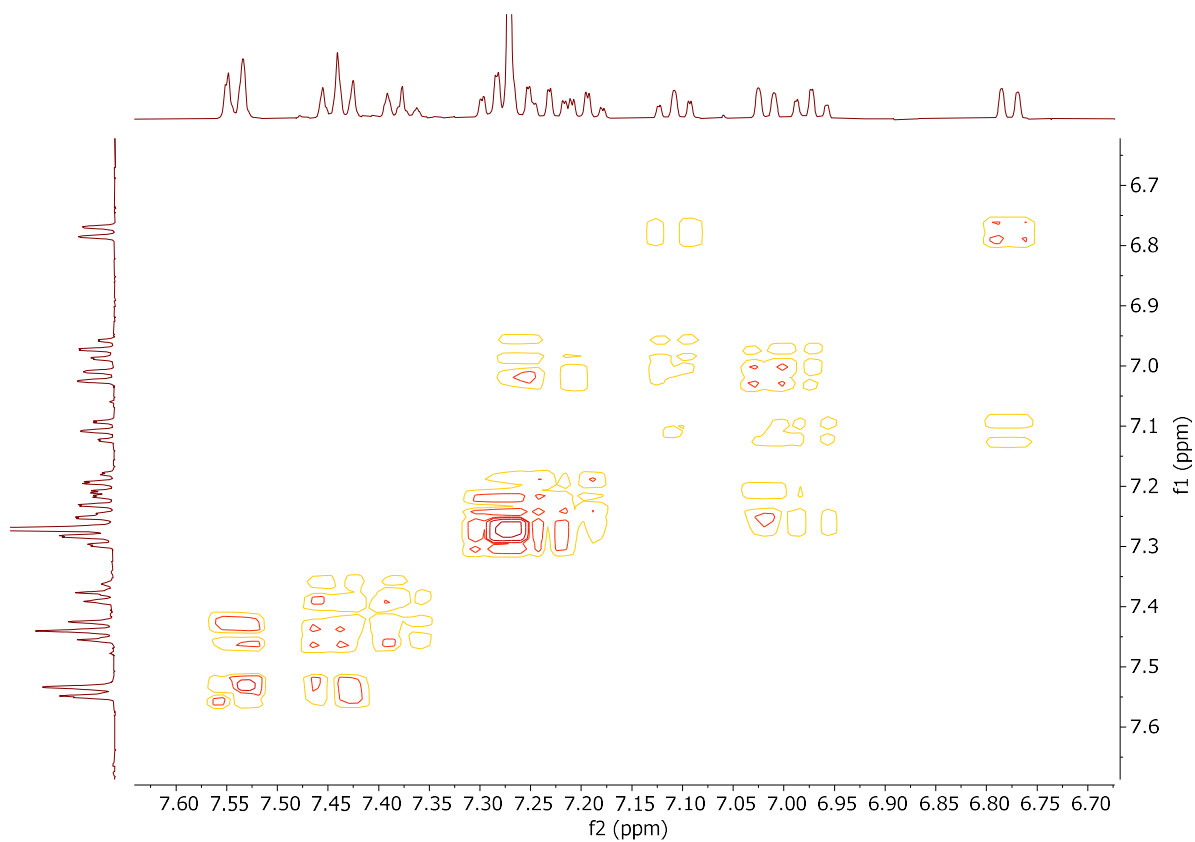

Figure S154: COSY spectrum of 3-((2-([1,1'-biphenyl]-2-ylthio)phenyl)thio)-1,2,5-trimethyl-1H-pyrrole **18** in CDCl<sub>3</sub>

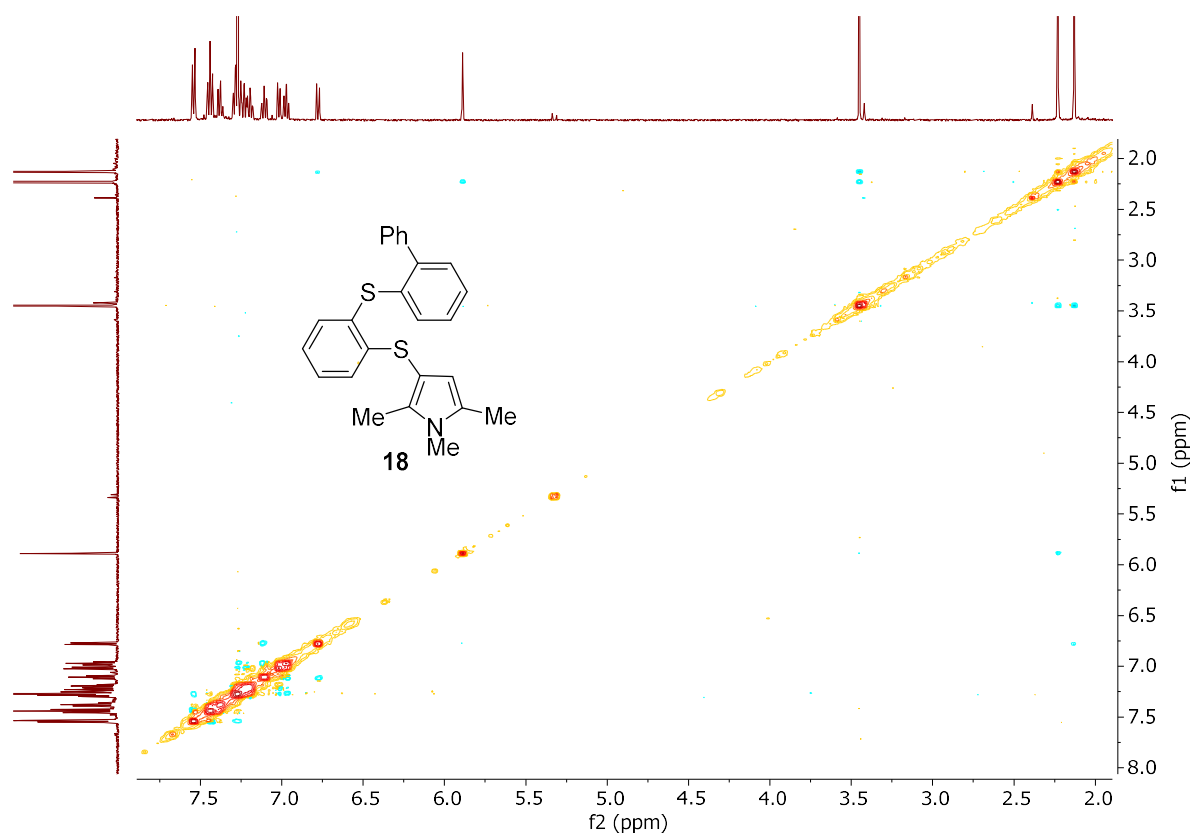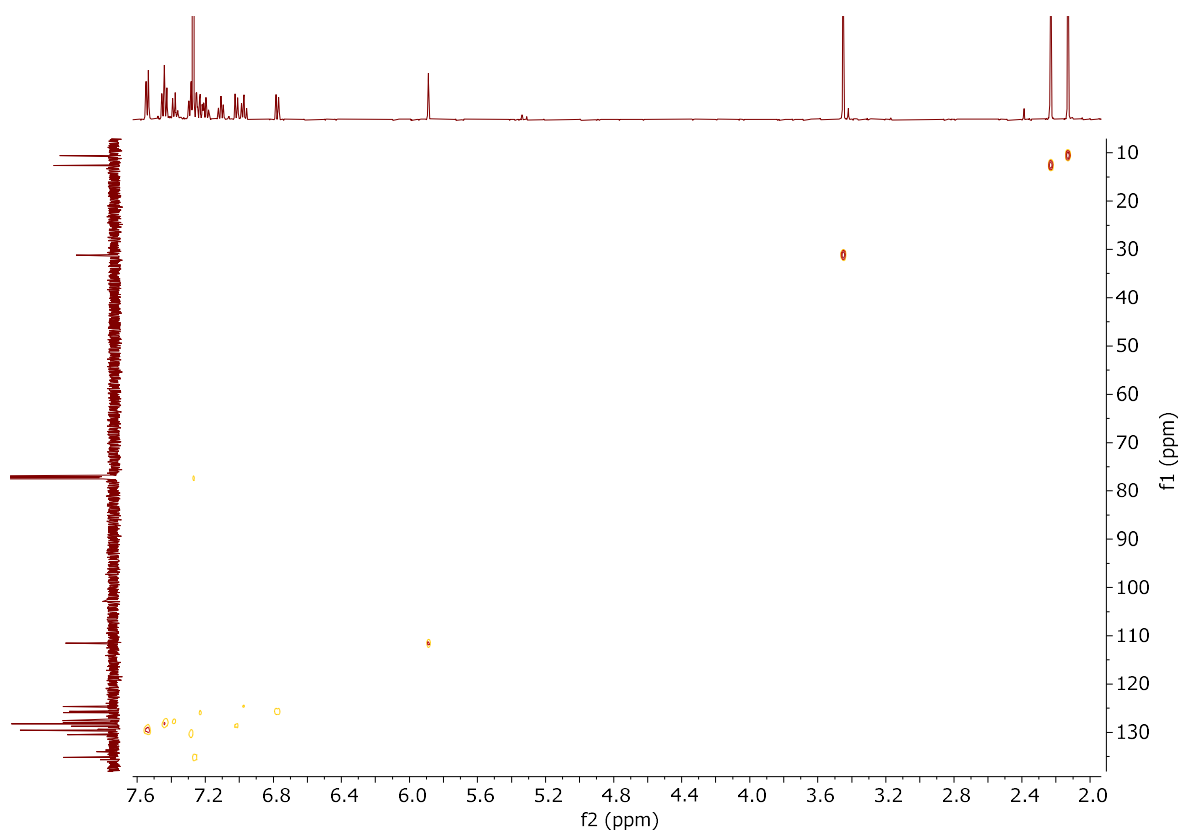

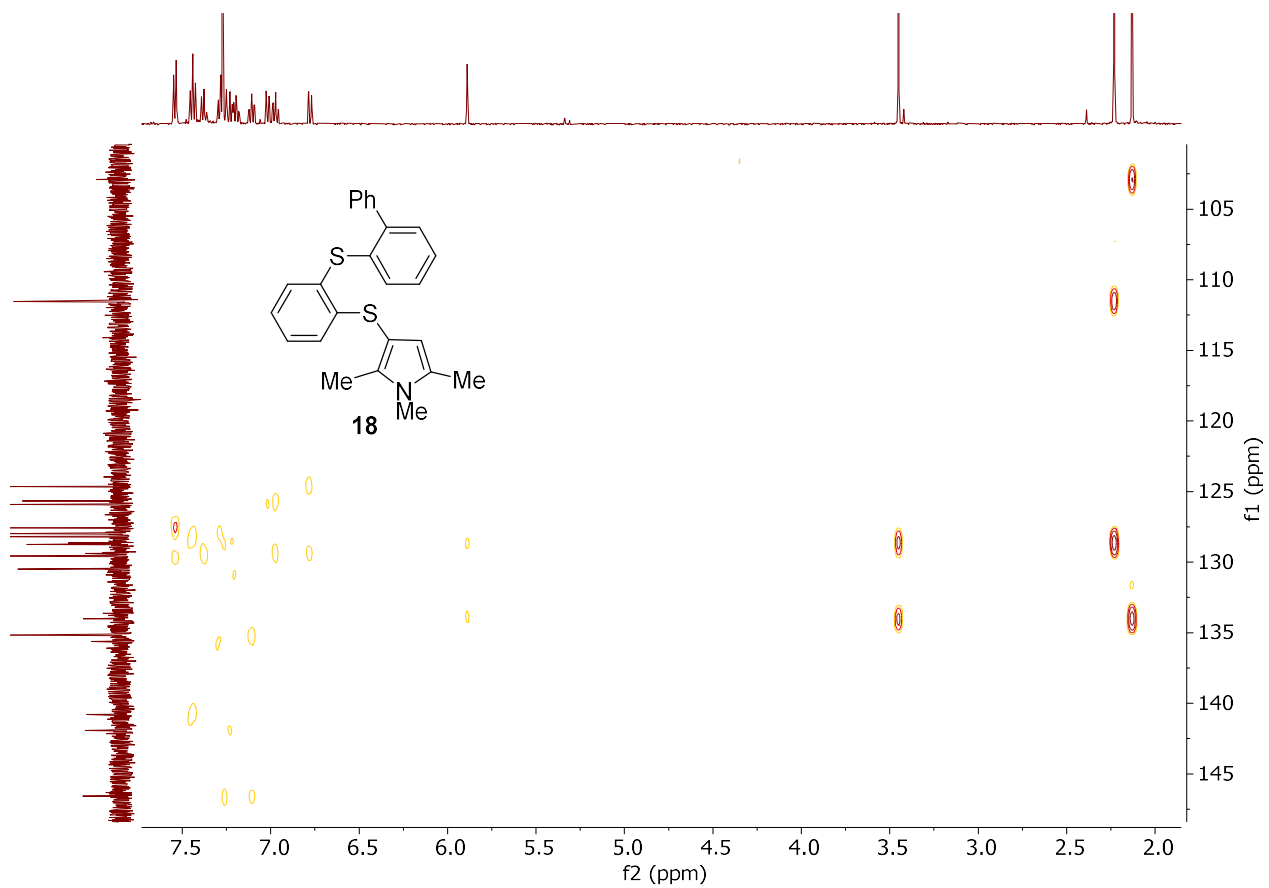

Figure S157: HMBC spectrum of 3-((2-([1,1'-biphenyl]-2-ylthio)phenyl)thio)-1,2,5-trimethyl-1H-pyrrole **18** in  $CDCl_3$

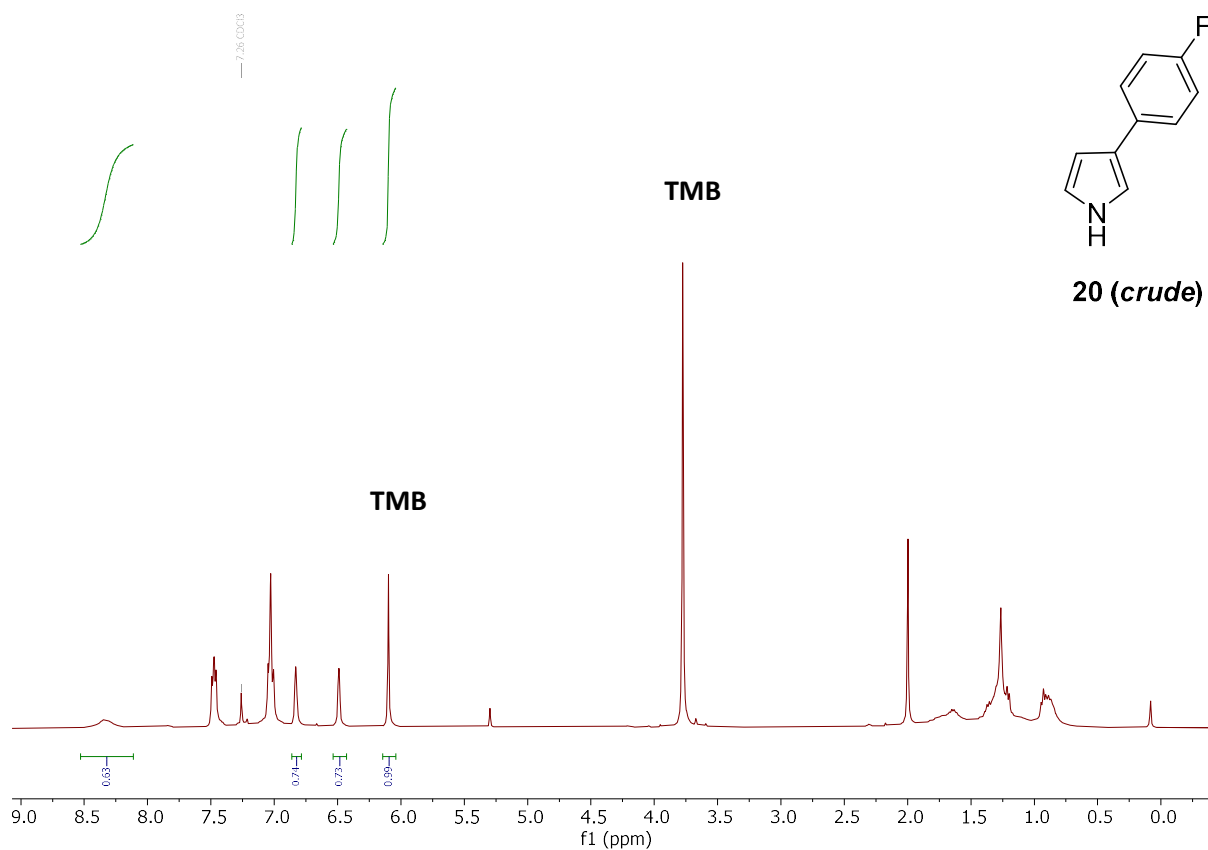

Figure S158:  $^1\text{H}$  Crude NMR of deprotection of 3-(4-fluorophenyl)-1-((2,4,6-triisopropylphenyl)sulfonyl)-1H-pyrrole **20** in  $\text{CDCl}_3$  with trimethoxy benzene (**TMB**) internal standard.

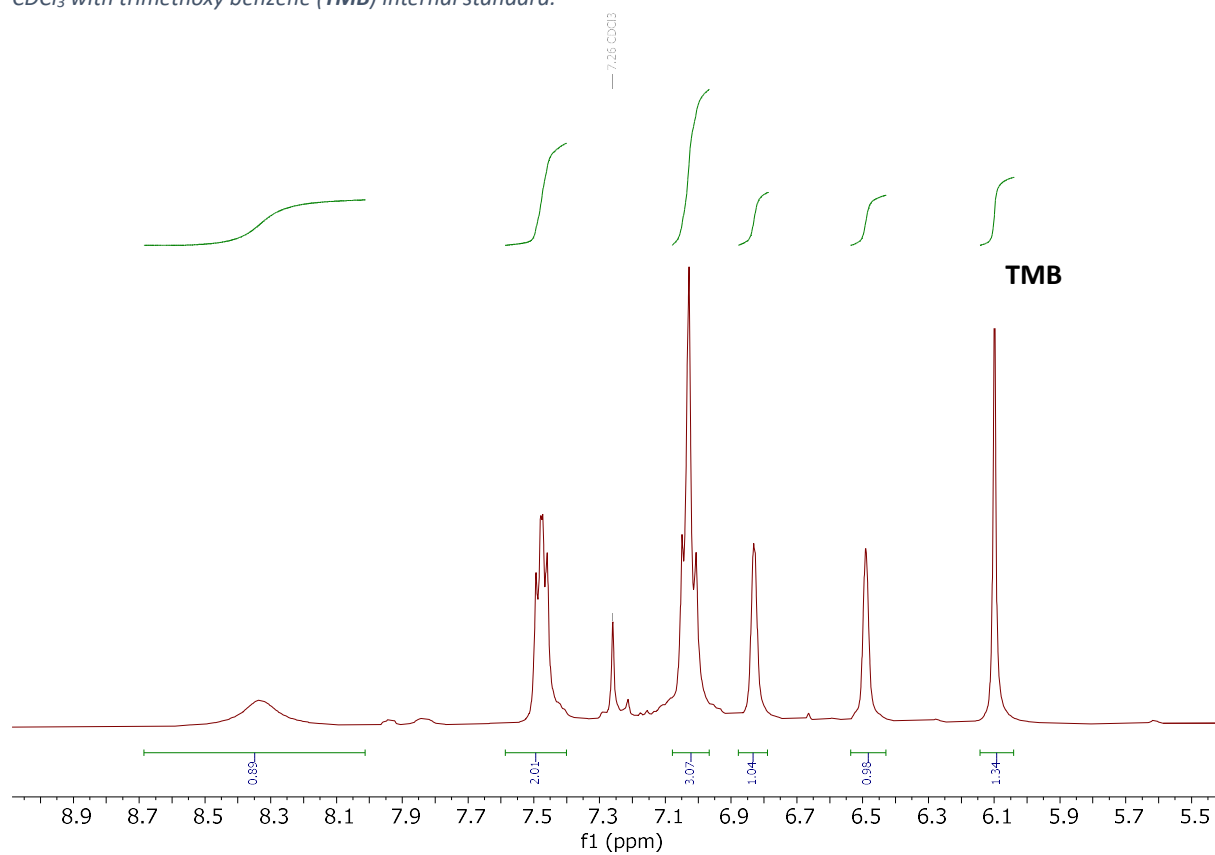

Figure S159: Zoomed region of  $^1\text{H}$  Crude NMR of deprotection of 3-(4-fluorophenyl)-1-((2,4,6-triisopropylphenyl)sulfonyl)-1H-pyrrole **20** in  $\text{CDCl}_3$  with trimethoxy benzene (**TMB**) internal standard

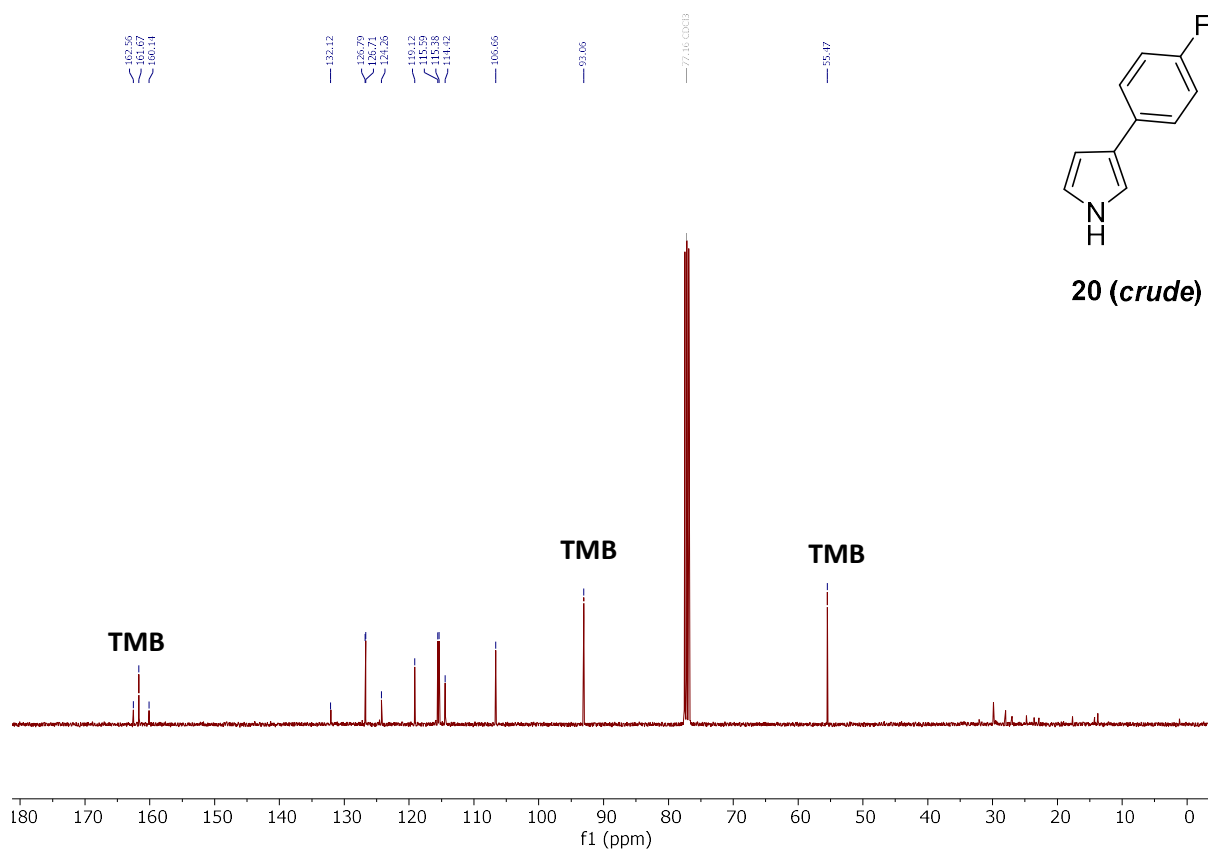

Figure S160: <sup>13</sup>C Crude NMR of deprotection of 3-(4-fluorophenyl)-1-((2,4,6-triisopropylphenyl)sulfonyl)-1H-pyrrole in CDCl<sub>3</sub> with trimethoxy benzene (TMB) internal standard

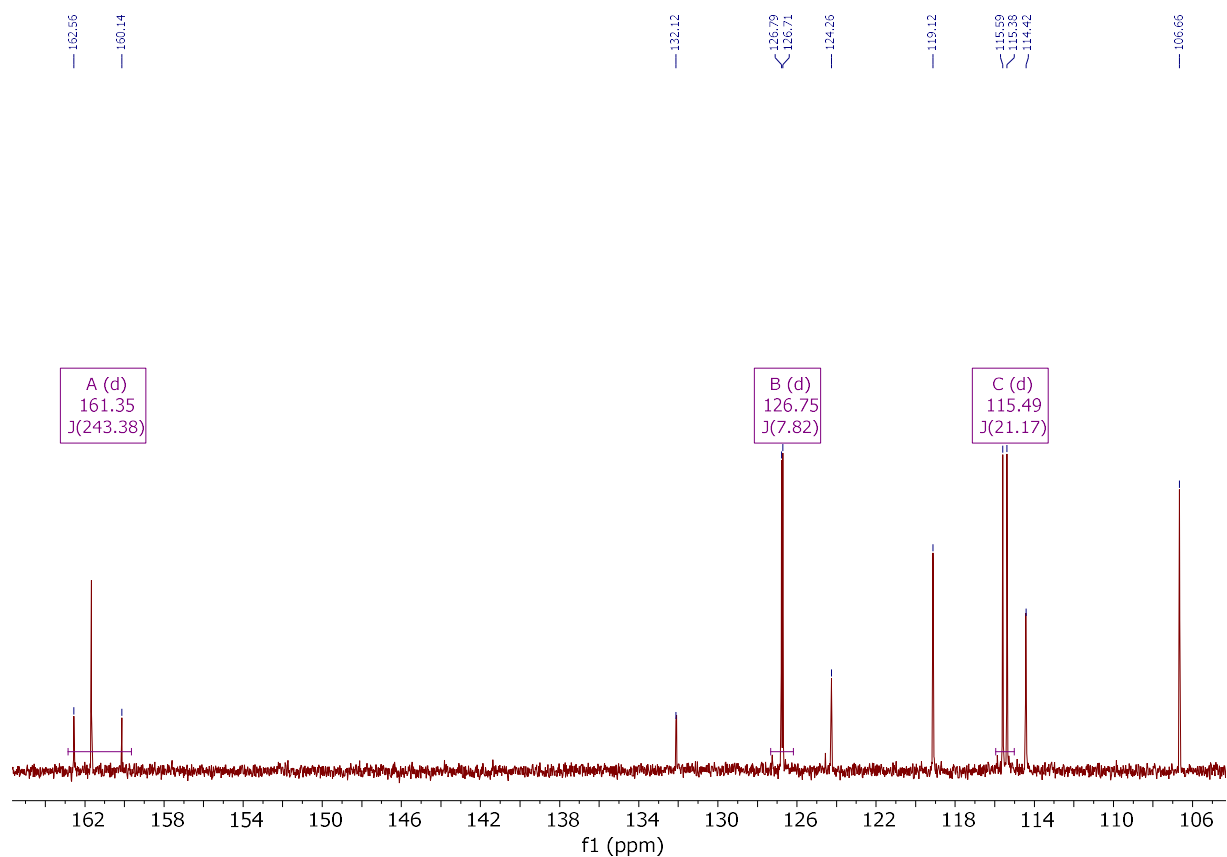

Figure S161: Zoomed region of <sup>13</sup>C Crude NMR of deprotection of 3-(4-fluorophenyl)-1-((2,4,6-triisopropylphenyl)sulfonyl)-1H-pyrrole in CDCl<sub>3</sub> with trimethoxy benzene (TMB) internal standard

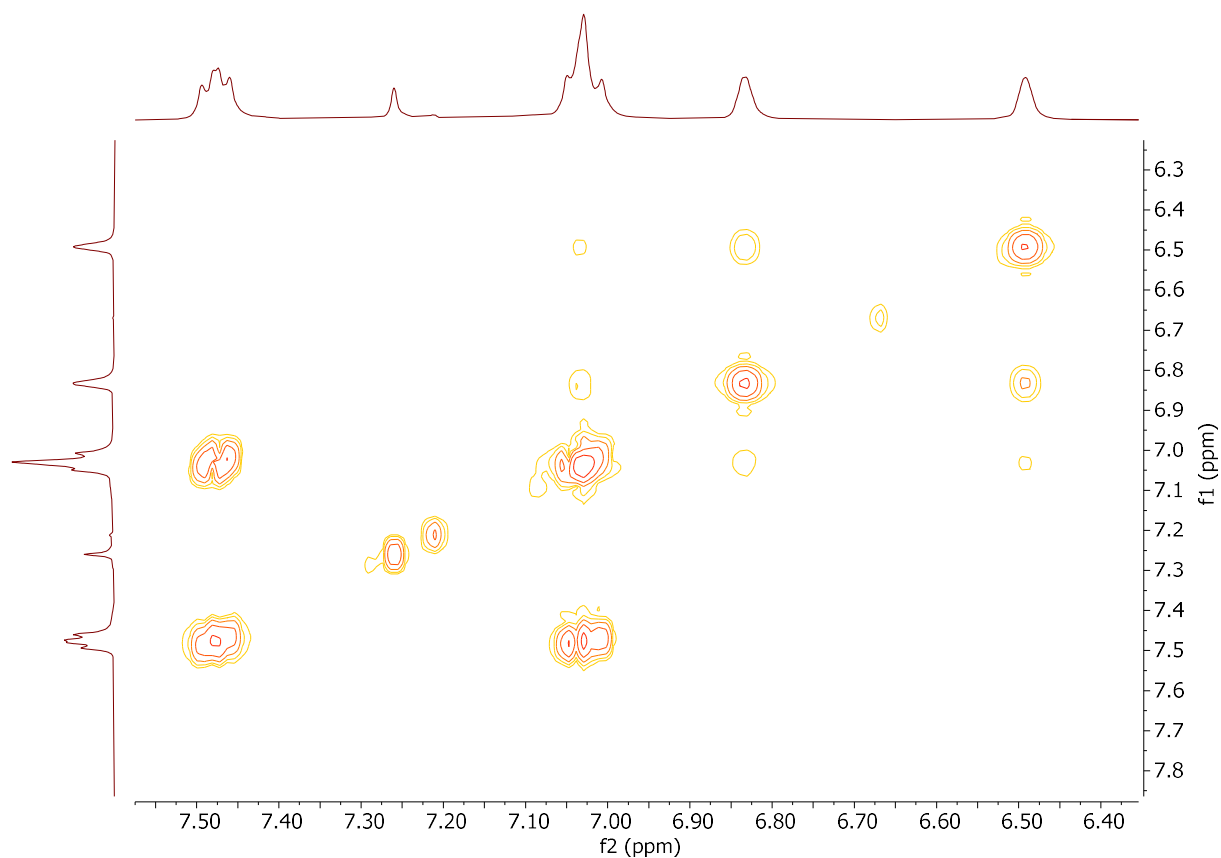

Figure S162: Crude COSY NMR of deprotection of 3-(4-fluorophenyl)-1-((2,4,6-triisopropylphenyl)sulfonyl)-1H-pyrrole **20** in  $\text{CDCl}_3$  with trimethoxy benzene (TMB) internal standard

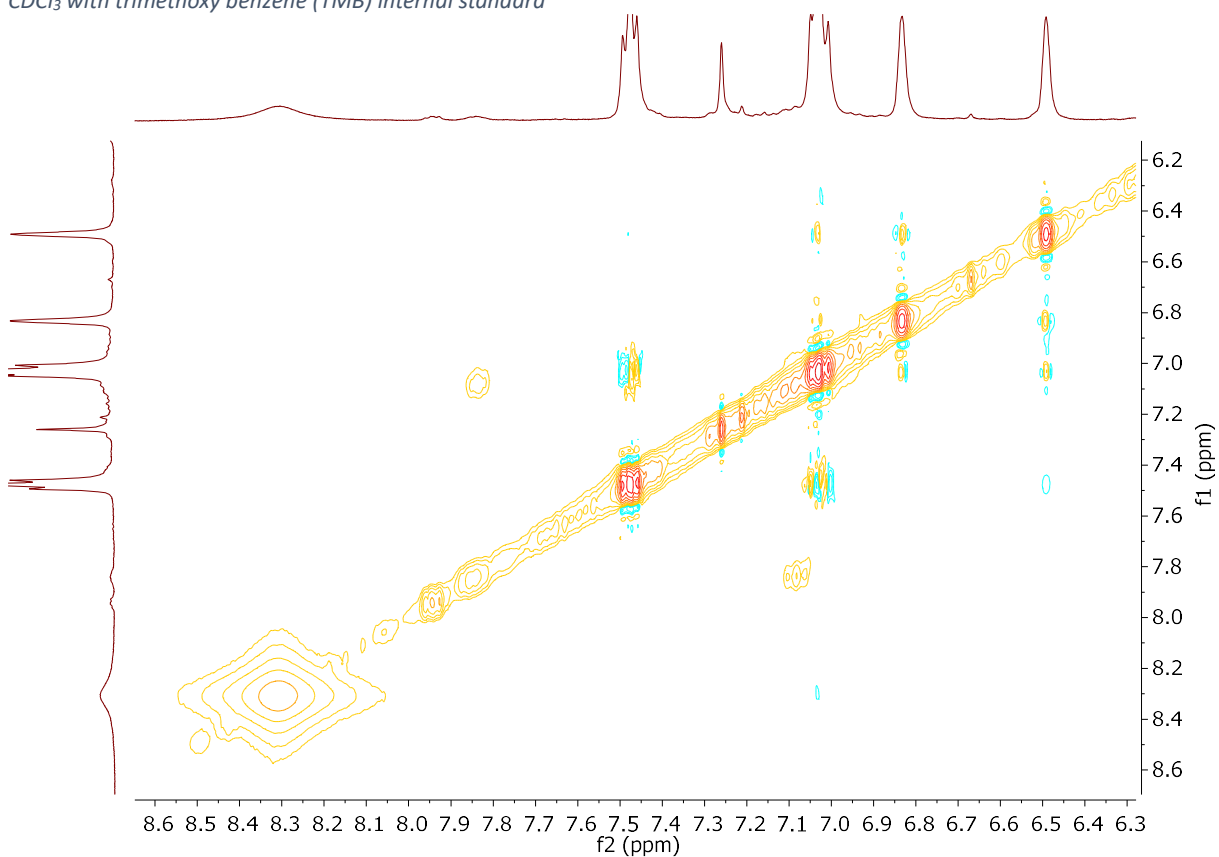

Figure S163: Crude NOESY NMR of deprotection of 3-(4-fluorophenyl)-1-((2,4,6-triisopropylphenyl)sulfonyl)-1H-pyrrole **20** with trimethoxy benzene (TMB) internal standard

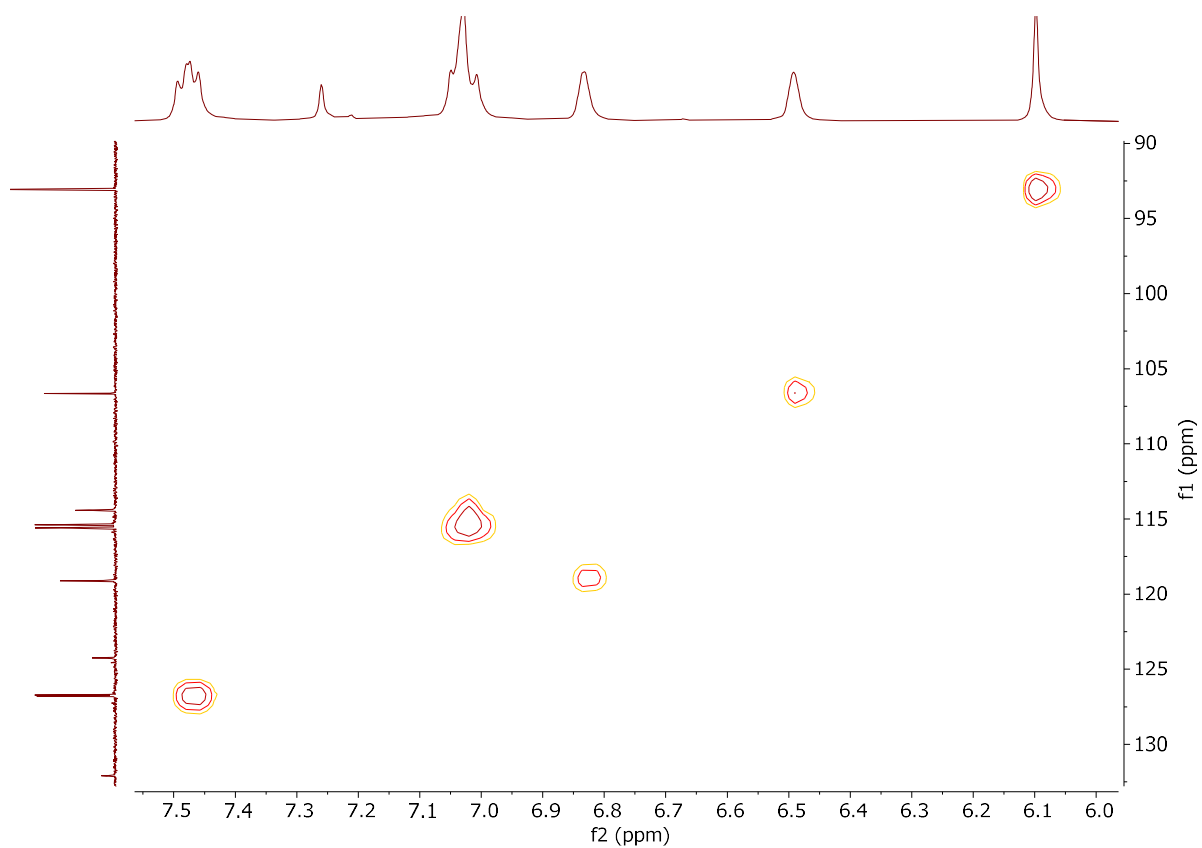

Figure S164: Crude HSQC NMR of deprotection of 3-(4-fluorophenyl)-1-((2,4,6-triisopropylphenyl)sulfonyl)-1H-pyrrole **20** with trimethoxy benzene (TMB) internal standard

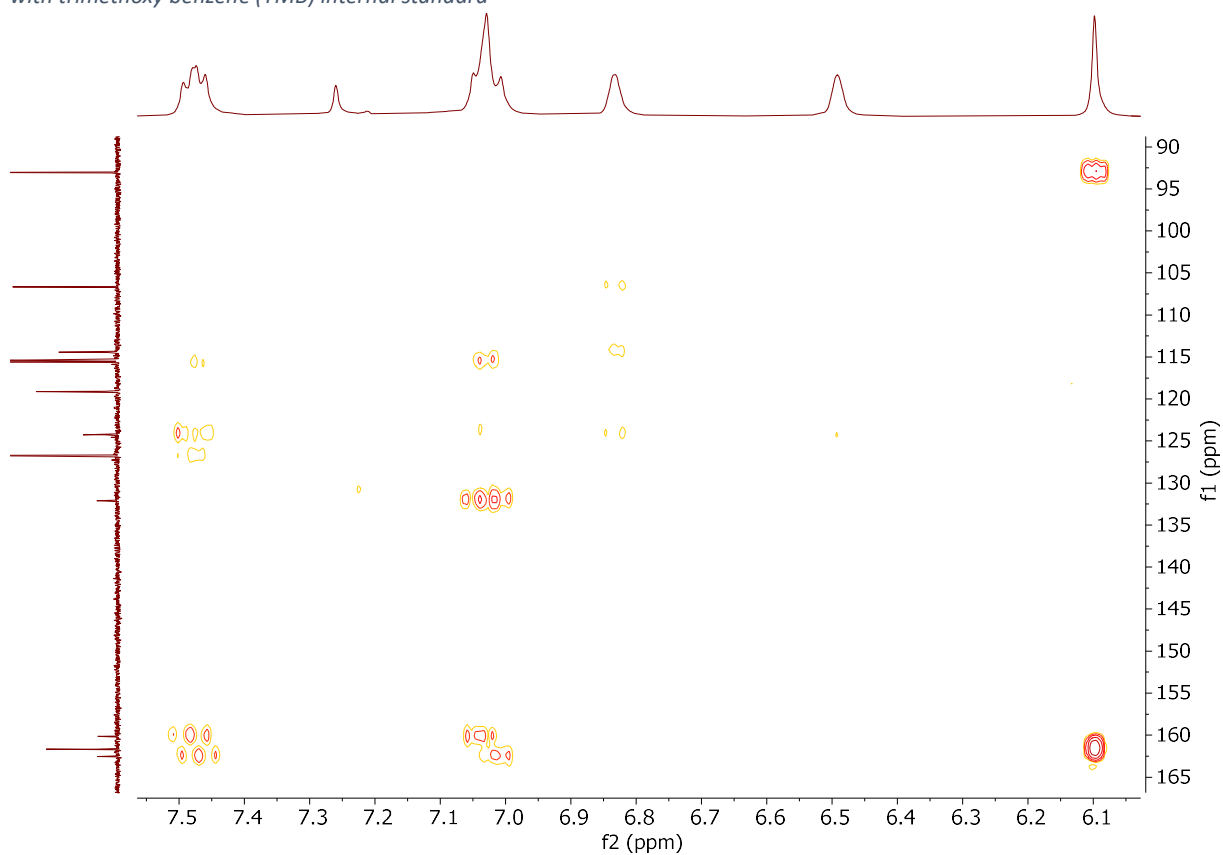

Figure S165: Crude HMBC NMR of deprotection of 3-(4-fluorophenyl)-1-((2,4,6-triisopropylphenyl)sulfonyl)-1H-pyrrole **20** with trimethoxy benzene (TMB) internal standard.



## References

1. CrysAlisPro 1.171.41.93a - 1.171.43.104a (Rigaku OD, 2020-23)
2. G. M. Sheldrick, *Acta Cryst.*, 2015, **C71**, 3-8.
3. C. B. Hübschle, G. M. Sheldrick and B. Dittrich, *J. Appl. Cryst.*, 2011, **44**, 1281-1284.
4. L. J. Farrugia, *J. Appl. Crystallogr.*, 1997, **30**, 565.
5. C. F. Macrae, P. R. Edgington, P. McCabe, E. Pidcock, G. P. Shields, R. Taylor, M. Towler and J. van der Streek, *J. Appl. Crystallogr.*, 2006, **39**, 453-457.
6. C. Retich and S. Bräse, *Eur. J. Org. Chem.*, 2018, 60-77
7. T. Okumi, A. Mori and K. Okano, *Chem. Commun.*, 2023, **59**, 1046-1049.
8. M. L. Rosenberg, J. H. F. Aasheim, M. Trebbin, E. Uggerud and T. Hansen, *Tetrahedron Lett.*, 2009, **50**, 6506-6508.
9. L. Knight, J. Huffman and M. Isherwood, *Synlett*, 2003, 1993-1996.
10. C. B. Bheeter, J. K. Bera and H. Doucet, *Tetrahedron Lett.*, 2012, **53**, 509-513.
11. T. J. Donohoe, A. J. Orr, K. Gosby and M. Bingham, *Eur. J. Org. Chem.*, 2005, 1969-1971.
12. K. Xu, W. J. Li, R. Sun, L. H. Luo, X. Chen, C. C. Zhang, X. L. Zheng, M. L. Yuan, H. Y. Fu, R. X. Li and H. Chen, *Org. Lett.*, 2020, **22**, 6107-6111.
